# Supplementary material for: ortho-Ethynyl group assisted regioselective and diastereoselective [2 + 2] cross-photocycloaddition of alkenes under photocatalyst-, additive-, and solvent-free conditions
Source: Royal Society of Chemistry journal article supplement (doi:10.1039/d1qo01017d), 2021-01-01

## *Supporting Information*

### **ortho-Ethynyl Group Assisted Regioselective and Diastereoselective [2+2] Cross-Photocycloaddition of Alkenes under Photocatalyst-, Additive-, and Solvent-free Conditions**

Xiaofei Xie, Hong Pan, Tai-Ping Zhou, Man-Yi Han, Lei Wang,\* Xiao Geng, Yongmin Ma, Rong-Zhen Liao,\* Zhi-Ming Wang, Jianguo Yang, and Pinhua Li\*

*Advanced Research Institute and Department of Chemistry, Taizhou University, Taizhou, Zhejiang 318000, P. R. China*

*Department of Chemistry; Key Laboratory of Green and Precise Synthetic Chemistry, Ministry of Education, Huaibei Normal University, Huaibei, Anhui 235000, P. R. China*

*School of Chemistry and Chemical Engineering, Huazhong University of Science and Technology, Wuhan, Hubei, 430074, P. R. China*

*State Key Laboratory of Organometallic Chemistry, Shanghai Institute of Organic Chemistry, Shanghai 200032, P. R. China*

## *Table of Contents*

|     |                                                                                              |      |
|-----|----------------------------------------------------------------------------------------------|------|
| 1.  | General considerations.....                                                                  | S3   |
| 2.  | General procedures for the synthesis of substrates and products.....                         | S3   |
| 3.  | X-Ray single crystal diffraction analysis of the products.....                               | S12  |
| 4.  | Further optimization of the reaction conditions .....                                        | S24  |
| 5.  | Mechanistic investigations.....                                                              | S25  |
| 6.  | The possible stereoisomers of [2+2]-cycloaddition products.....                              | S32  |
| 7.  | DFT calculations for the [2+2] cross-cycloaddition of <b>1a</b> and <b>2a</b> .....          | S33  |
| 8.  | Characterization data for the products.....                                                  | S76  |
| 9.  | <sup>1</sup> H NMR, <sup>13</sup> C NMR and <sup>19</sup> F NMR spectra of the products..... | S111 |
| 10. | HRMS spectra for the products.....                                                           | S177 |

## 1. General considerations

All  $^1\text{H}$  NMR,  $^{13}\text{C}$  NMR and  $^{19}\text{F}$  NMR spectra were recorded on a 600 MHz or 400 MHz Bruker FT-NMR spectrometers (600/150/564 MHz, or 400/100/376 MHz, respectively). All chemical shifts are given as  $\delta$  value (ppm) with reference to tetramethylsilane (TMS) as an internal standard. The peak patterns are indicated as follows: s, singlet; d, doublet; t, triplet; m, multiplet; q, quartet. The coupling constants,  $J$ , are reported in Hertz (Hz). High resolution mass spectroscopy data of the product were collected on an Agilent Technologies 6540 UHD Accurate-Mass Q-TOF LC/MS (ESI). The chemicals and solvents were purchased from commercial suppliers either Aldrich (USA), or Shanghai Chemical Company (P. R. China). Products were purified by flash chromatography on 200–300 mesh silica gels,  $\text{SiO}_2$ .

## 2. General procedures for the synthesis of substrates and products

### 2.1 Representative procedure for the synthesis of 1a and 4a

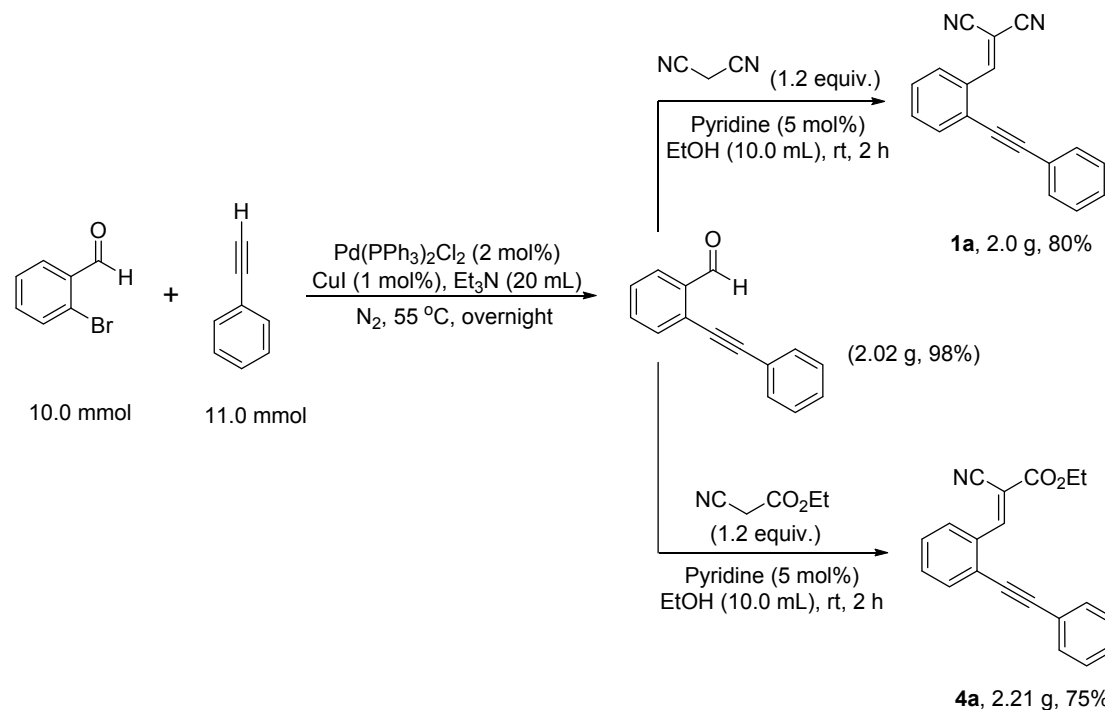

To a solution of 2-bromobenzaldehyde (1.85 g, 10.0 mmol) and ethynylbenzene (1.124g, 11.0 mmol) in Et<sub>3</sub>N (20.0 mL) was added Pd(PPh<sub>3</sub>)<sub>2</sub>Cl<sub>2</sub> (140 mg, 2.0% mol) and CuI (20 mg, 1.0% mol). The mixture was stirred at 55 °C for overnight. It was then quenched with water and washed with ethyl acetate. After removal of solvent, the crude residue was purified by flash chromatography on silica gel (petroleum ether/ethyl acetate = 100:1, v/v) to afford the desired product 2-(phenylethynyl)benzaldehyde (2.02 g, 98% yield).

To a solution of 2-(phenylethynyl)benzaldehyde (2.02 g, 9.8 mmol) and malononitrile (780 mg, 11.8 mmol) in EtOH (10.0 mL) at room temperature was added pyridine (39 mg, 5% mol) under air. The reaction mixture was stirred at room temperature for 2 h, then mixed solution was suction filtered and washed with ethanol to afford the desired product **1a** (yellow solid, 2.0 g, 80% yield).

To a solution of 2-(phenylethynyl)benzaldehyde (2.02 g, 9.8 mmol) and ethyl 2-cyanoacetate (1.34 g, 11.8 mmol) in EtOH (10.0 mL) at room temperature was added pyridine (39 mg, 5% mol) under air. The reaction mixture was stirred at room temperature for 2 h, then mixed solution was suction filtered and washed with ethanol to afford the desired product **4a** (yellow solid, 2.21 g, 75% yield).

**2-(2-(Phenylethynyl)benzylidene)malononitrile (1a):** Yellow solid. m.p. 105.7–106.3 °C. <sup>1</sup>H NMR (400 MHz, CDCl<sub>3</sub>) δ 8.44 (s, 1H), 8.30–8.28 (m, 1H), 7.69–7.67 (m, 1H), 7.60–7.54 (m, 3H), 7.50–7.46 (m, 1H), 7.42–7.38 (m, 1H); <sup>13</sup>C NMR (100 MHz, CDCl<sub>3</sub>) δ 157.8, 133.8, 133.3, 131.7, 131.6, 129.5, 128.9,

128.6, 127.9, 126.6, 121.6, 113.7, 112.4, 98.5, 85.1, 83.9. HRMS (ESI)  $[M+H]^+$

Calcd. for  $[C_{18}H_{11}N_2]^+$ : 255.0917, Found: 255.0920.

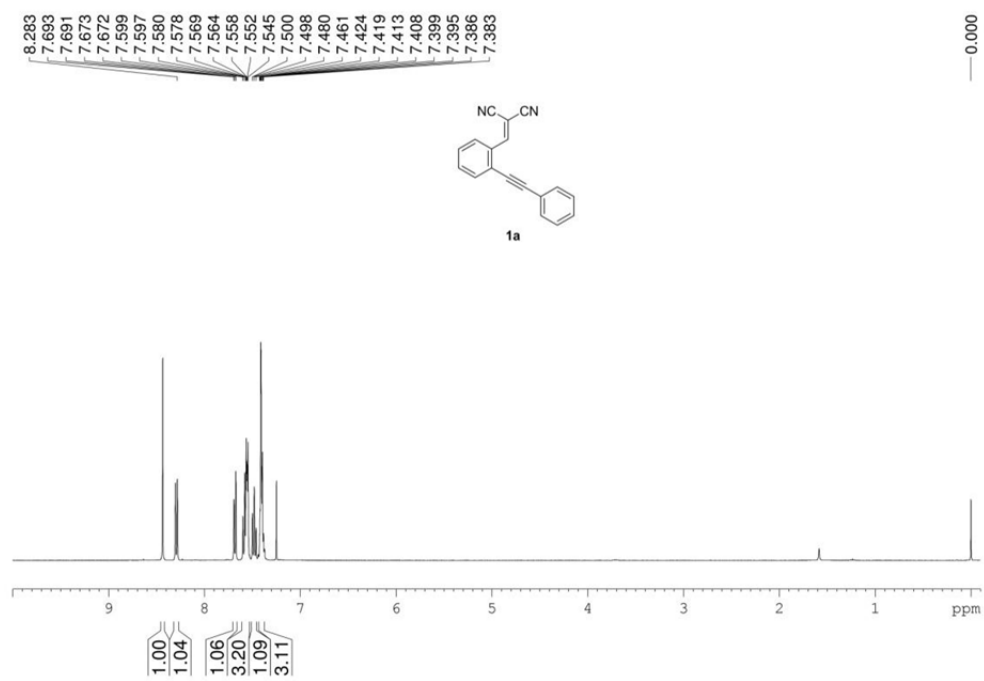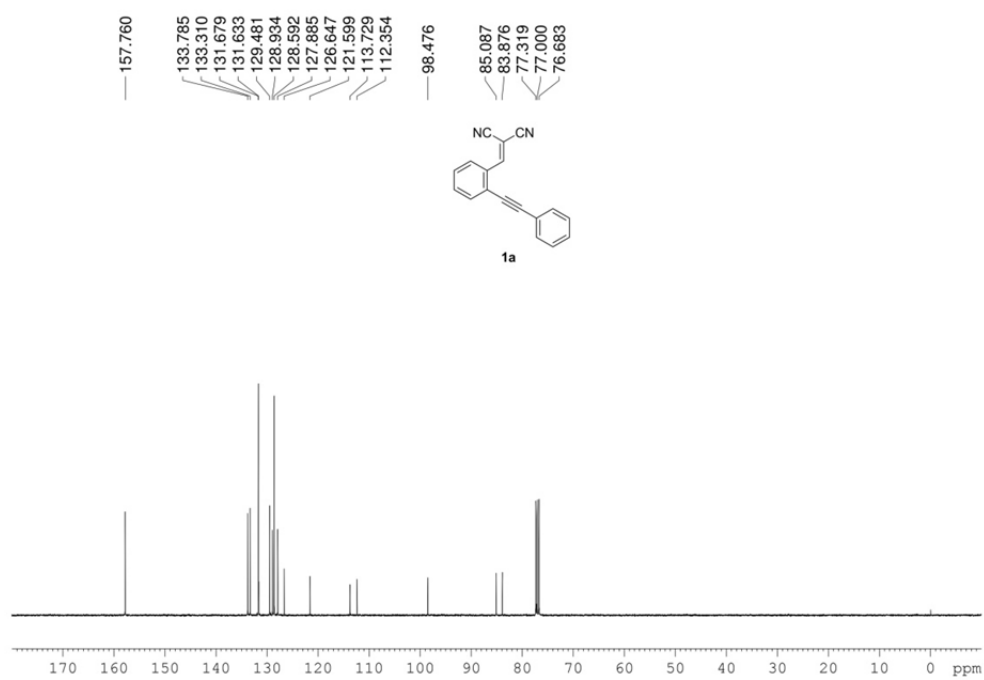

**Ethyl (*E*)-2-cyano-3-(2-(phenylethynyl)phenyl)acrylate (4a):** Yellow solid. m.p. 56.2–58.1 °C. <sup>1</sup>H NMR (400 MHz, CDCl<sub>3</sub>) δ 9.01 (s, 1H), 8.42–8.40 (m, 1H), 7.67–7.65 (m, 1H), 7.59 (s, 2H), 7.54–7.45 (m, 2H), 7.39 (s, 3H), 4.44–4.39 (m, 2H), 1.41 (t, *J* = 8.0 Hz, 3H); <sup>13</sup>C NMR (100 MHz, CDCl<sub>3</sub>) δ 162.3, 153.0, 132.8, 132.6, 132.5, 131.7, 129.1, 128.8, 128.5, 128.3, 126.7, 122.2, 115.3, 104.3, 97.8, 85.9, 62.7, 14.1. HRMS (ESI) [M+Na]<sup>+</sup> Calcd. for [C<sub>20</sub>H<sub>15</sub>NNaO<sub>2</sub>]<sup>+</sup>: 324.0995, Found: 324.0999.

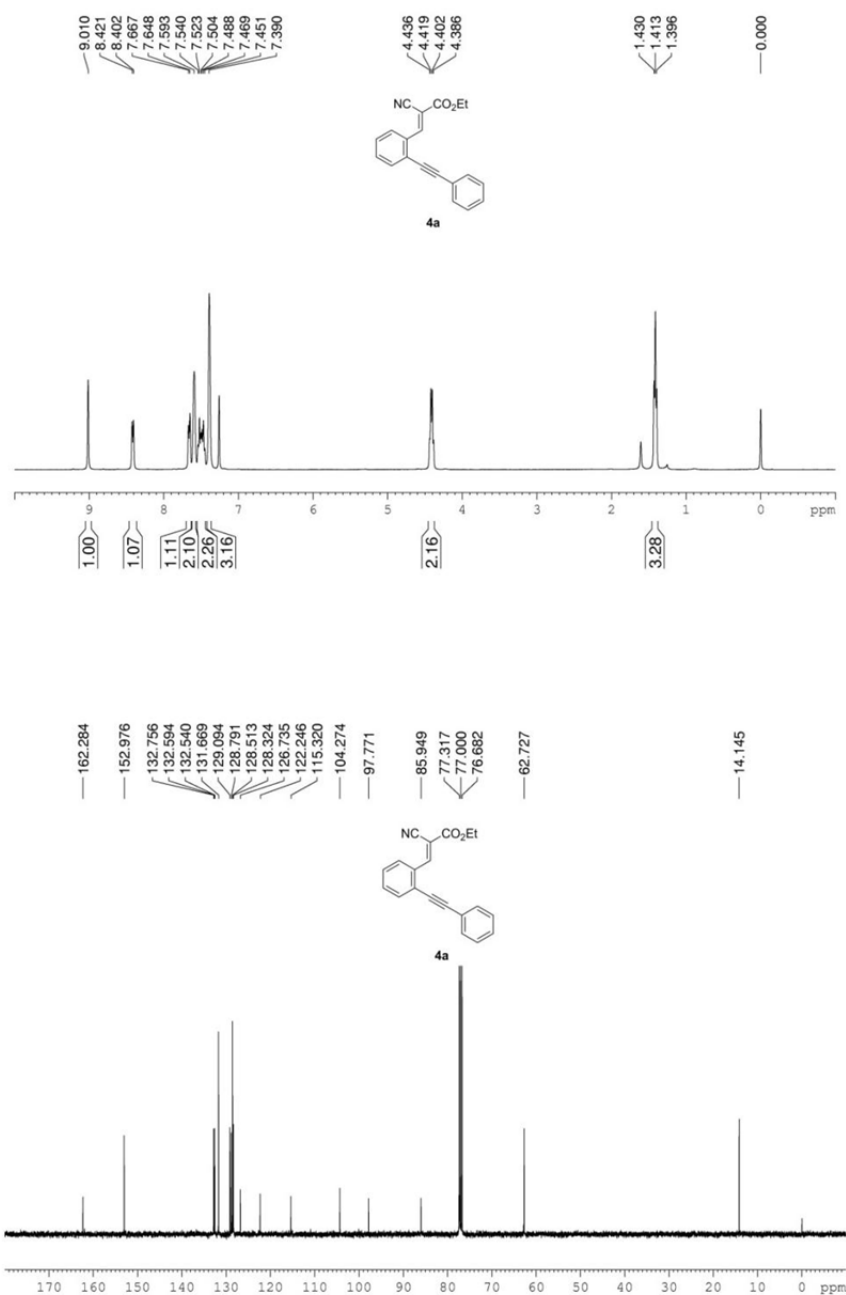

## 2.2 Representative procedure for *ortho*-ethynyl group assisted regioselective and diastereoselective [2+2] cross-photocycloaddition of alkenes

### 2.2.1 Synthesis of **3aa** and **3(aa)'** in 0.20 mmol scale

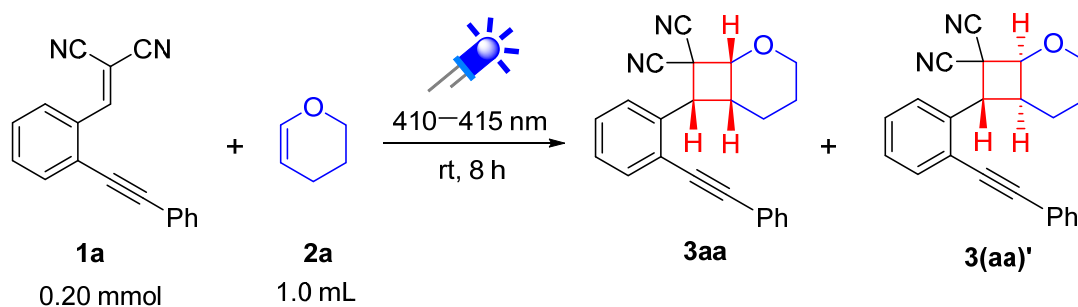

A 5 mL oven-dried reaction vessel equipped with a magnetic stirrer bar was charged with 2-(2-(phenylethynyl)benzylidene)malononitrile (**1a**, 50.9 mg, 0.20 mmol), 3,4-dihydro-2*H*-pyran (**2a**, 1.0 mL). The reaction vessel was exposed to blue LED (410–415 nm, 3 W) irradiation at room temperature in air with stirring for 8 h. After completion of the reaction, the mixture was concentrated to yield the crude product, which was further purified by flash chromatography (silica gel, petroleum ether/ethyl acetate = 20:1, V/V) to give the product **3aa** (54 mg, 79% yield) and product **3(aa)'** (8 mg, 11% yield).

### 2.2.2 Synthesis of **3aa** in 2.0 mmol scale

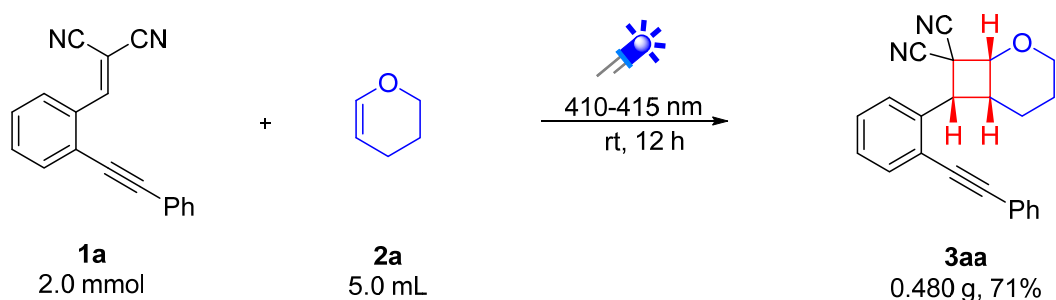

A 20.0 mL oven-dried reaction vessel equipped with a magnetic stirrer bar was charged with 2-(2-(phenylethynyl)benzylidene)malononitrile (**1a**, 0.520 g, 2.0 mmol) and 3,4-dihydro-2*H*-pyran (**2a**, 5.0 mL). The reaction vessel was exposed to LED (410–415 nm, 3 W) irradiation at room temperature in air with stirring for 12 h. After

completion of the reaction, the mixture was concentrated to yield the crude product, which was further purified by flash chromatography (silica gel, petroleum ether/ethyl acetate = 20:1) to give the desired product **3aa** (0.480 g, 71% yield).

### 2.2.3 Synthesis of **7ac** in 2.0 mmol scale

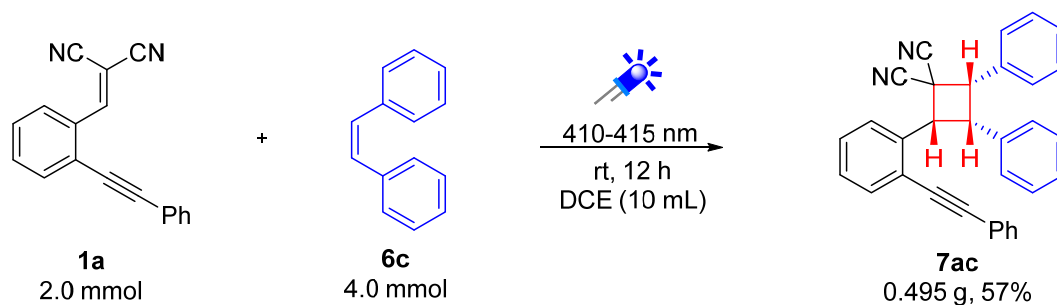

A 20 mL oven-dried reaction vessel equipped with a magnetic stirrer bar was charged with 2-(2-(phenylethynyl)benzylidene)malononitrile (**1a**, 0.509 g, 2.0 mmol), (*Z*)-1,2-diphenylethene (**6c**, 0.721 g, 4.0 mmol) and DCE (10.0 mL). The reaction vessel was exposed to LED (410–415 nm) irradiation at room temperature in air with stirring for 12 h. After completion of the reaction, the mixture was concentrated to yield the crude product, which was further purified by flash chromatography (silica gel, petroleum ether/ethyl acetate = 20:1) to give the desired product **7ac** (0.495 g, 57% yield).

### 2.3.1 Further transformations of **7ac** into compound **10**

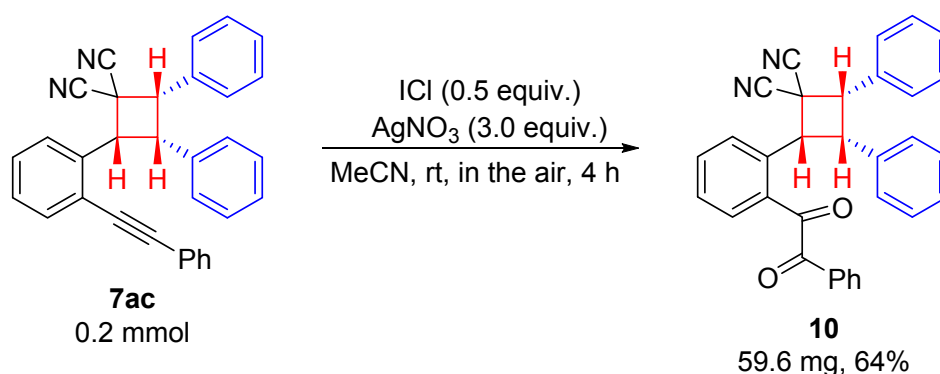

According to a reported procedure (see: W. Yang, Y. Chen, Y. Yao, X. Yang, Q. Lin, D. Yang, *J. Org. Chem.* **2019**, *84*, 11080–11090), a 5 mL oven-dried reaction



vessel equipped with a magnetic stirrer bar was charged with ( $\pm$ )-(*2S,3S,4R*)-2,3-diphenyl-4-(2-(phenylethynyl)phenyl)cyclobutane-1,1-dicarbonitrile (**7ac**, 86.9 mg, 0.2 mmol), ICl (16.3 mg, 0.10 mmol), AgNO<sub>3</sub> (101.9 mg, 0.60 mmol) and MeCN (2.0 mL). The reaction vessel was exposed to room temperature in air with stirring for 4 h. After completion of the reaction, the mixture was concentrated to yield the crude product, which was further purified by flash chromatography (silica gel, petroleum ether/ethyl acetate = 10:1, V/V) to give the product **10** (59.6 mg, 64% yield).

**( $\pm$ )-(*2R,3S,4S*)-2-(2-(2-Oxo-2-phenylacetyl)phenyl)-3,4-diphenylcyclobutane-1,1-dicarbonitrile (**10**):** Brown oil. <sup>1</sup>H NMR (400 MHz, CDCl<sub>3</sub>)  $\delta$  7.93–7.91 (m, 1H), 7.77–7.73 (m, 1H), 7.61–7.55 (m, 2H), 7.47–7.41 (m, 3H), 7.35–7.31 (m, 2H), 7.27–7.24 (m, 2H), 7.23–7.19 (m, 2H), 7.16–7.12 (m, 2H), 6.96–6.91 (m, 4H), 5.58 (d, *J* = 9.2 Hz, 1H), 5.13 (t, *J* = 9.6 Hz, 1H), 4.78 (d, *J* = 9.6 Hz, 1H); <sup>13</sup>C NMR (100 MHz, CDCl<sub>3</sub>)  $\delta$  195.8, 193.4, 135.7, 134.7, 134.5, 134.3, 133.4, 132.7, 132.5, 131.8, 131.0, 129.7, 129.0, 128.9, 128.6, 128.39, 128.36, 128.1, 127.6, 116.0, 114.3, 49.8, 49.7, 49.0, 37.9. HRMS (ESI) [M+Na]<sup>+</sup> Calcd. for [C<sub>32</sub>H<sub>22</sub>N<sub>2</sub>NaO<sub>2</sub>]<sup>+</sup>: 489.1573, Found: 489.1573.

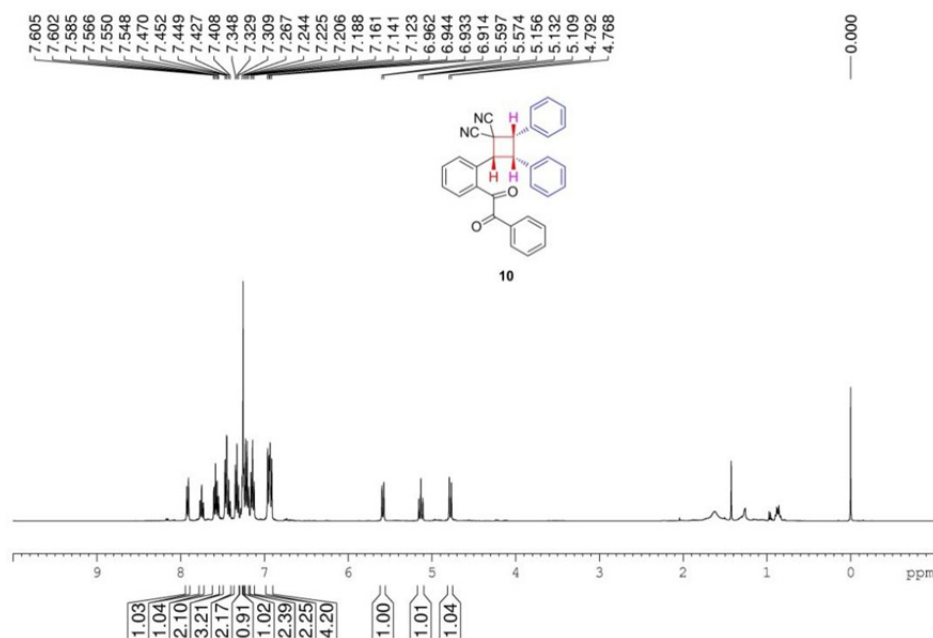

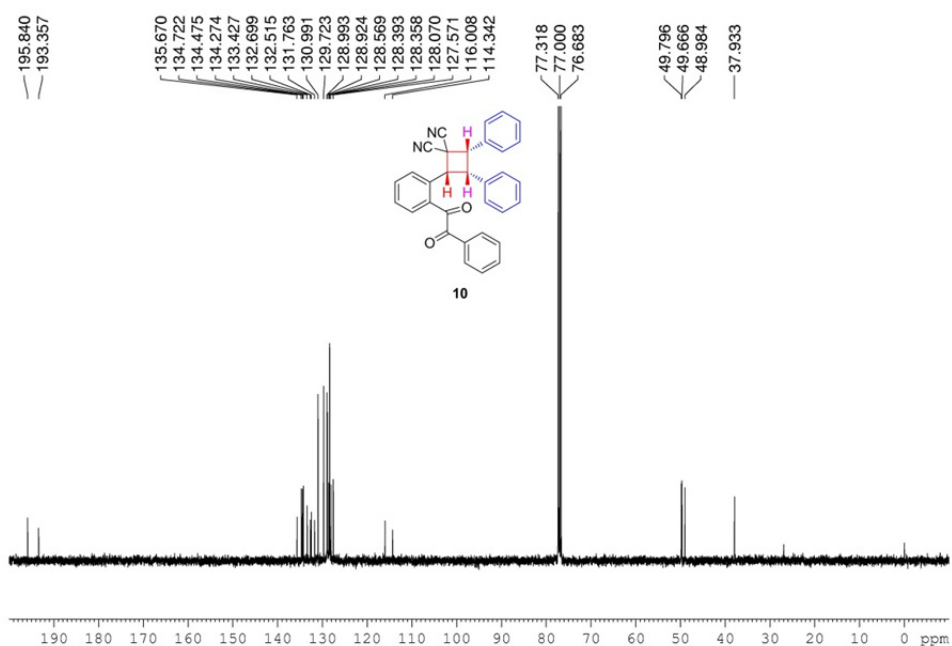

### 2.3.2 Further transformations of 7ac into compound 11

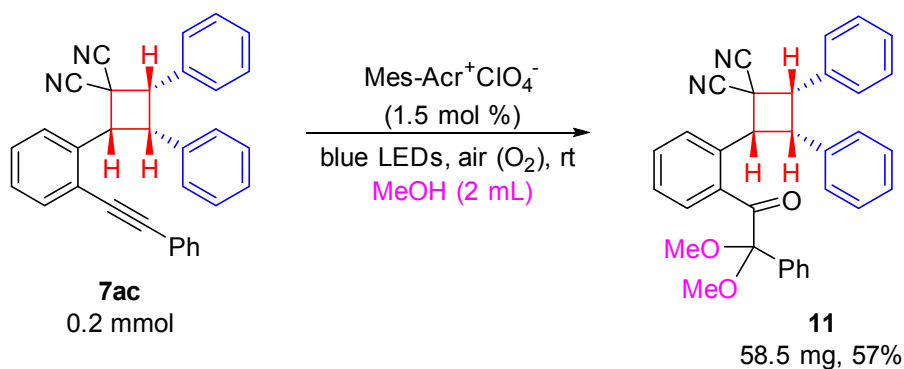

According to a reported procedure (see: W.-L. Lei, B. Yang, Q.-B. Zhang, P.-F. Yuan, L.-Z. Wu, Q. Liu, *Green Chem.* **2018**, *20*, 5479–5483), a 5.0 mL oven-dried reaction vessel equipped with a magnetic stirrer bar was charged with (±)-(2*S*,3*S*,4*R*)-2,3-diphenyl-4-(2-(phenylethynyl)phenyl)cyclobutane-1,1-dicarbonitrile (**7ac**, 86.9 mg, 0.2 mmol), 9-mesityl-10-methylacridinium perchlorate (1.3 mg, 1.5 mol%) and MeOH (2.0 mL). The reaction vessel was exposed to LED (450–455 nm, 3 W)

irradiation at room temperature in air with stirring for 3 h. After completion of the reaction, the mixture was concentrated to yield the crude product, which was further purified by flash chromatography (silica gel, petroleum ether/ethyl acetate = 20:1, V/V) to give the product **11** (58.5 mg, 57% yield).

**(±)-(2*R*,3*S*,4*S*)-2-(2-(2,2-Dimethoxy-2-phenylacetyl)phenyl)-3,4-diphenyl**

**cyclobutane-1,1-dicarbonitrile (11):** Brown oil.  $^1\text{H}$  NMR (400 MHz,  $\text{CDCl}_3$ )  $\delta$  7.95–7.93 (m, 1H), 7.48–7.46 (m, 1H), 7.43–7.40 (m, 2H), 7.32–7.27 (m, 6H), 7.21–7.17 (m, 1H), 7.13–7.09 (m, 1H), 7.06–7.02 (m, 2H), 7.01–6.99 (m, 2H), 6.89–6.87 (m, 2H), 5.00 (d,  $J = 9.2$  Hz, 1H), 4.84 (t,  $J = 9.2$  Hz, 1H), 4.68 (d,  $J = 9.6$  Hz, 1H), 3.18 (s, 3H), 2.94 (s, 3H);  $^{13}\text{C}$  NMR (100 MHz,  $\text{CDCl}_3$ )  $\delta$  197.9, 136.6, 135.3, 134.1, 133.6, 132.8, 131.6, 131.0, 129.0, 128.7, 128.4, 128.3, 128.2, 128.1, 128.0, 127.3, 127.2, 126.8, 116.0, 114.5, 103.8, 50.1, 50.0, 49.9, 49.5, 48.5, 37.8. HRMS (ESI)  $[\text{M}+\text{Na}]^+$  Calcd. for  $[\text{C}_{34}\text{H}_{28}\text{N}_2\text{NaO}_3]^+$ : 535.1992, Found: 535.1995.

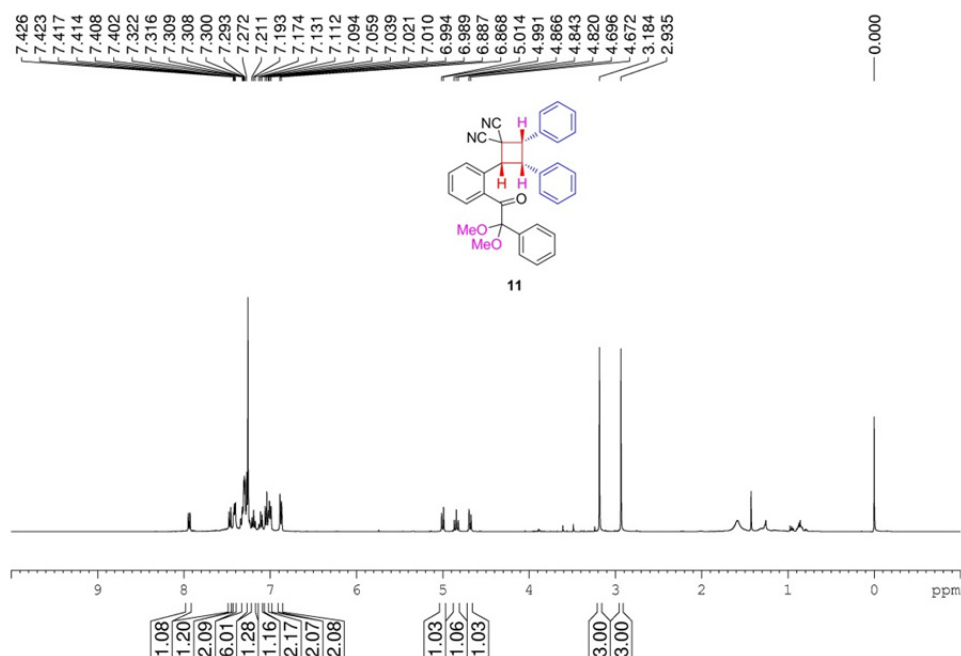

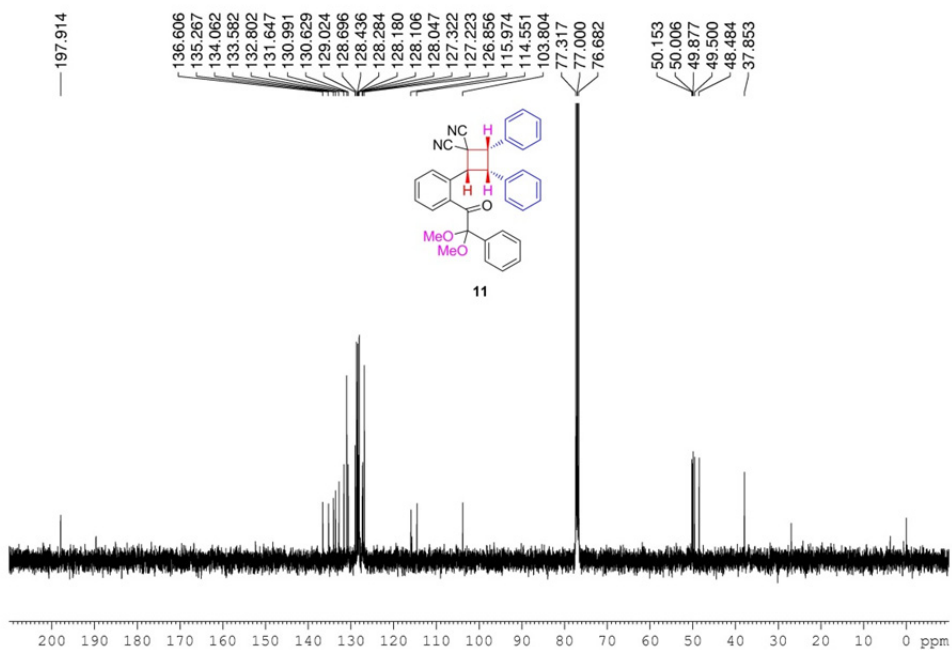

### 3. X-Ray single crystal diffraction analysis of the products

#### 3.1 X-Ray single crystal diffraction analysis of 3aa (CCDC: 2035710)

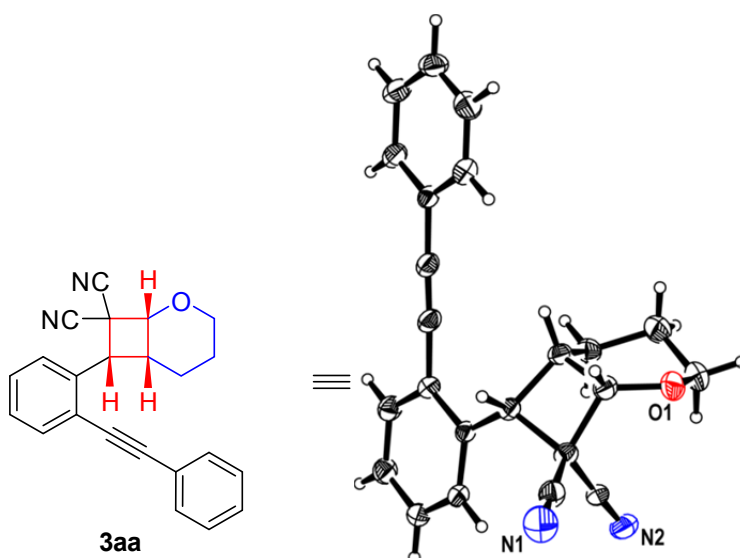

## checkCIF/PLATON report

Structure factors have been supplied for datablock(s) 1

THIS REPORT IS FOR GUIDANCE ONLY. IF USED AS PART OF A REVIEW PROCEDURE FOR PUBLICATION, IT SHOULD NOT REPLACE THE EXPERTISE OF AN EXPERIENCED CRYSTALLOGRAPHIC REFEREE.

No syntax errors found.

[CIF dictionary](#)

[Interpreting this report](#)

### Datablock: 1

---

Bond precision: C-C = 0.0031 A                      Wavelength=0.71073

Cell:                      a=7.6019(8)              b=26.579(3)              c=9.0787(10)  
                            alpha=90              beta=98.982(2)              gamma=90

Temperature:              296 K

|                | Calculated   | Reported     |
|----------------|--------------|--------------|
| Volume         | 1811.9(3)    | 1811.9(3)    |
| Space group    | P 21/n       | P 21/n       |
| Hall group     | -P 2yn       | -P 2yn       |
| Moiety formula | C23 H18 N2 O | ?            |
| Sum formula    | C23 H18 N2 O | C23 H18 N2 O |
| Mr             | 338.39       | 338.39       |
| Dx, g cm-3     | 1.240        | 1.241        |
| Z              | 4            | 4            |
| Mu (mm-1)      | 0.077        | 0.077        |
| F000           | 712.0        | 712.0        |
| F000'          | 712.27       |              |
| h, k, lmax     | 9, 31, 10    | 9, 31, 10    |
| Nref           | 3176         | 3174         |
| Tmin, Tmax     | 0.985, 0.990 |              |
| Tmin'          | 0.979        |              |

Correction method= Not given

Data completeness= 0.999                      Theta(max)= 24.990

R(reflections)= 0.0459( 1970)              wR2(reflections)= 0.1308( 3174)

S = 0.915                      Npar= 235

---

The following ALERTS were generated. Each ALERT has the format  
**test-name\_ALERT\_alert-type\_alert-level.**  
Click on the hyperlinks for more details of the test.

---

### 3.2 X-Ray single crystal diffraction analysis of 3(aa)' (CCDC: 2035711)

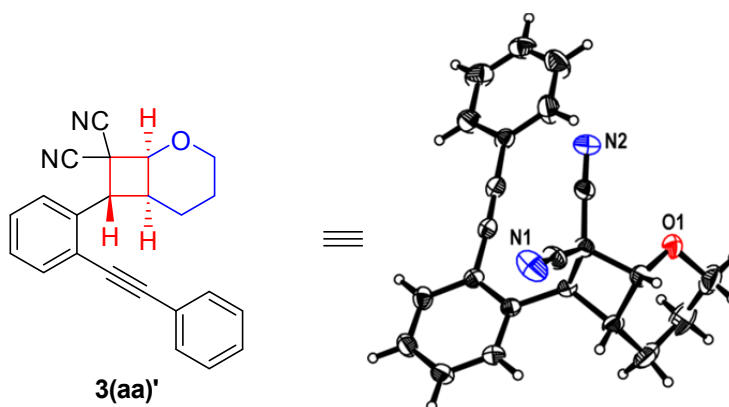

#### Datablock: 1

---

|                        |                |                                  |              |
|------------------------|----------------|----------------------------------|--------------|
| Bond precision:        | C-C = 0.0030 Å | Wavelength=0.71073               |              |
| Cell:                  | a=11.6258 (16) | b=11.1970 (16)                   | c=15.042 (2) |
|                        | alpha=90       | beta=110.329 (2)                 | gamma=90     |
| Temperature:           | 296 K          |                                  |              |
|                        | Calculated     | Reported                         |              |
| Volume                 | 1836.1 (4)     | 1836.1 (4)                       |              |
| Space group            | P 21/c         | P 21/c                           |              |
| Hall group             | -P 2ybc        | -P 2ybc                          |              |
| Moiety formula         | C23 H18 N2 O   | ?                                |              |
| Sum formula            | C23 H18 N2 O   | C23 H18 N2 O                     |              |
| Mr                     | 338.39         | 338.39                           |              |
| Dx, g cm <sup>-3</sup> | 1.224          | 1.224                            |              |
| Z                      | 4              | 4                                |              |
| Mu (mm <sup>-1</sup> ) | 0.076          | 0.076                            |              |
| F000                   | 712.0          | 712.0                            |              |
| F000'                  | 712.27         |                                  |              |
| h, k, lmax             | 13, 13, 17     | 13, 13, 17                       |              |
| Nref                   | 3229           | 3221                             |              |
| Tmin, Tmax             | 0.980, 0.985   |                                  |              |
| Tmin'                  | 0.980          |                                  |              |
| Correction method=     | Not given      |                                  |              |
| Data completeness=     | 0.998          | Theta(max)= 24.998               |              |
| R(reflections)=        | 0.0454 ( 2445) | wR2(reflections)= 0.1401 ( 3221) |              |
| S =                    | 0.873          | Npar= 236                        |              |

---

### 3.3 X-Ray single crystal diffraction analysis of 3ab (CCDC: 2035712)

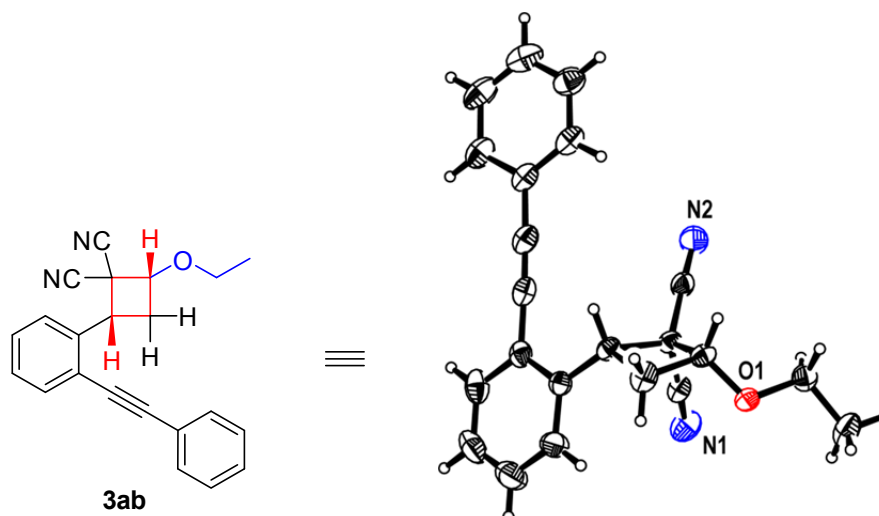

#### Datablock: 1

---

Bond precision: C-C = 0.0027 Å

Wavelength=0.71073

Cell: a=12.2425 (11)  
alpha=90

b=7.5829 (7)  
beta=101.893 (2)

c=20.0771 (19)  
gamma=90

Temperature: 296 K

|                        | Calculated   | Reported     |
|------------------------|--------------|--------------|
| Volume                 | 1823.8 (3)   | 1823.8 (3)   |
| Space group            | P 21/c       | P 21/c       |
| Hall group             | -P 2ybc      | -P 2ybc      |
| Moiety formula         | C22 H18 N2 O | ?            |
| Sum formula            | C22 H18 N2 O | C22 H18 N2 O |
| Mr                     | 326.38       | 326.38       |
| Dx, g cm <sup>-3</sup> | 1.189        | 1.189        |
| Z                      | 4            | 4            |
| Mu (mm <sup>-1</sup> ) | 0.074        | 0.074        |
| F000                   | 688.0        | 688.0        |
| F000'                  | 688.26       |              |
| h, k, lmax             | 14, 9, 23    | 14, 9, 23    |
| Nref                   | 3199         | 3194         |
| Tmin, Tmax             | 0.978, 0.979 |              |
| Tmin'                  | 0.978        |              |

Correction method= Not given

Data completeness= 0.998

Theta(max)= 24.999

R(reflections)= 0.0424 ( 2321)

wR2(reflections)= 0.1160 ( 3194)

S = 1.050

Npar= 227

---

### 3.4 X-Ray single crystal diffraction analysis of 5aa (CCDC: 2035713)

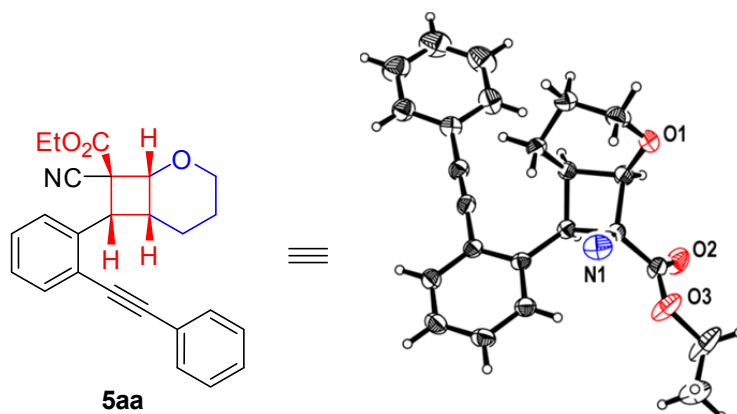

#### Datablock: 1

---

|                        |                                                  |                                                  |                          |
|------------------------|--------------------------------------------------|--------------------------------------------------|--------------------------|
| Bond precision:        | C-C = 0.0032 Å                                   | Wavelength=0.71073                               |                          |
| Cell:                  | a=11.0334 (12)<br>alpha=90                       | b=8.2617 (9)<br>beta=94.328 (2)                  | c=23.153 (3)<br>gamma=90 |
| Temperature:           | 296 K                                            |                                                  |                          |
|                        | Calculated                                       | Reported                                         |                          |
| Volume                 | 2104.5 (4)                                       | 2104.5 (4)                                       |                          |
| Space group            | P 21/n                                           | P 21/n                                           |                          |
| Hall group             | -P 2yn                                           | -P 2yn                                           |                          |
| Moiety formula         | C <sub>25</sub> H <sub>23</sub> N O <sub>3</sub> | ?                                                |                          |
| Sum formula            | C <sub>25</sub> H <sub>23</sub> N O <sub>3</sub> | C <sub>25</sub> H <sub>23</sub> N O <sub>3</sub> |                          |
| Mr                     | 385.44                                           | 385.44                                           |                          |
| Dx, g cm <sup>-3</sup> | 1.217                                            | 1.217                                            |                          |
| Z                      | 4                                                | 4                                                |                          |
| Mu (mm <sup>-1</sup> ) | 0.080                                            | 0.080                                            |                          |
| F <sub>000</sub>       | 816.0                                            | 816.0                                            |                          |
| F <sub>000</sub> '     | 816.37                                           |                                                  |                          |
| h, k, lmax             | 13, 9, 27                                        | 13, 9, 27                                        |                          |
| Nref                   | 3699                                             | 3696                                             |                          |
| Tmin, Tmax             | 0.979, 0.983                                     |                                                  |                          |
| Tmin'                  | 0.979                                            |                                                  |                          |
| Correction method=     | Not given                                        |                                                  |                          |
| Data completeness=     | 0.999                                            | Theta (max)= 24.994                              |                          |
| R(reflections)=        | 0.0480 ( 2516)                                   | wR2(reflections)=                                | 0.1367 ( 3696)           |
| S =                    | 1.069                                            | Npar=                                            | 263                      |

---



### 3.5 X-Ray single crystal diffraction analysis of 5(aa)' (CCDC: 2045867)

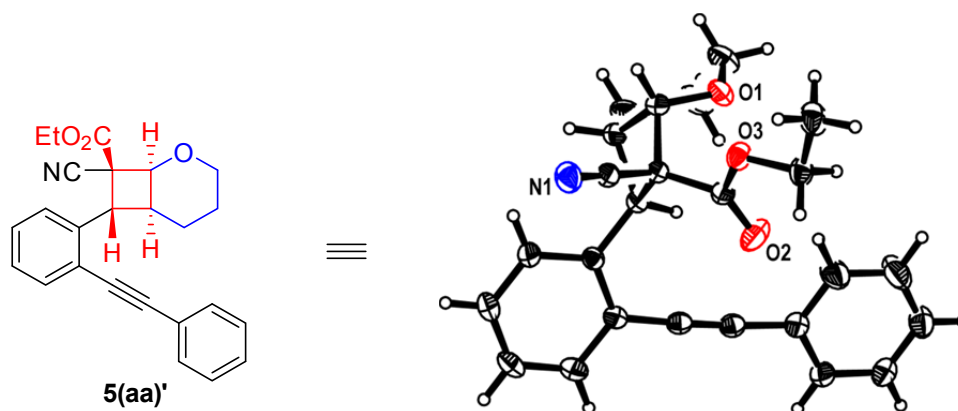

#### Datablock: 1

---

|                        |                                                  |                                                  |                |
|------------------------|--------------------------------------------------|--------------------------------------------------|----------------|
| Bond precision:        | C-C = 0.0023 Å                                   | Wavelength=0.71073                               |                |
| Cell:                  | a=11.9742 (8)                                    | b=12.1683 (8)                                    | c=15.4294 (11) |
|                        | alpha=90                                         | beta=109.162 (1)                                 | gamma=90       |
| Temperature:           | 296 K                                            |                                                  |                |
|                        | Calculated                                       | Reported                                         |                |
| Volume                 | 2123.6 (3)                                       | 2123.6 (3)                                       |                |
| Space group            | P 21/c                                           | P 21/c                                           |                |
| Hall group             | -P 2ybc                                          | -P 2ybc                                          |                |
| Moiety formula         | C <sub>25</sub> H <sub>23</sub> N O <sub>3</sub> | ?                                                |                |
| Sum formula            | C <sub>25</sub> H <sub>23</sub> N O <sub>3</sub> | C <sub>25</sub> H <sub>23</sub> N O <sub>3</sub> |                |
| Mr                     | 385.44                                           | 385.44                                           |                |
| Dx, g cm <sup>-3</sup> | 1.206                                            | 1.206                                            |                |
| Z                      | 4                                                | 4                                                |                |
| Mu (mm <sup>-1</sup> ) | 0.079                                            | 0.079                                            |                |
| F000                   | 816.0                                            | 816.0                                            |                |
| F000'                  | 816.37                                           |                                                  |                |
| h, k, lmax             | 14, 14, 18                                       | 14, 14, 18                                       |                |
| Nref                   | 3746                                             | 3737                                             |                |
| Tmin, Tmax             | 0.980, 0.984                                     |                                                  |                |
| Tmin'                  | 0.980                                            |                                                  |                |
| Correction method=     | Not given                                        |                                                  |                |
| Data completeness=     | 0.998                                            | Theta(max)= 24.996                               |                |
| R(reflections)=        | 0.0407 ( 2801)                                   | wR2(reflections)= 0.1142 ( 3737)                 |                |
| S =                    | 0.970                                            | Npar= 263                                        |                |

---

### 3.6 X-Ray single crystal diffraction analysis of 7aa (CCDC: 2035714)

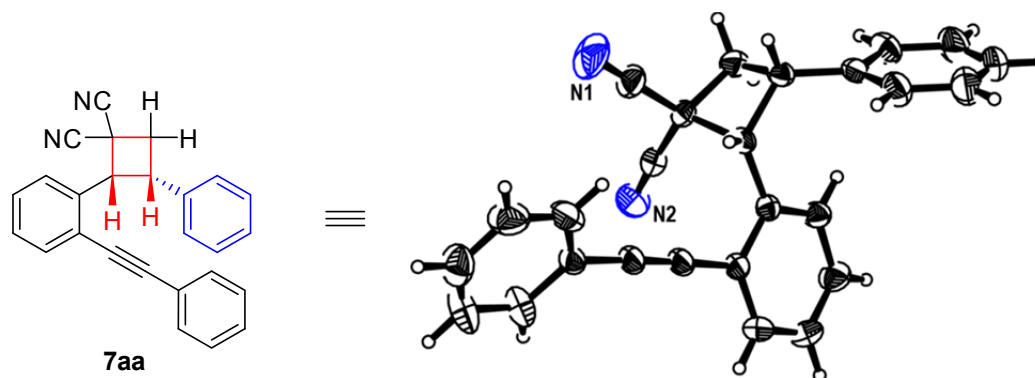

#### Datablock: 1

Bond precision: C-C = 0.0032 Å

Wavelength=0.71073

Cell: a=19.398(3)

b=10.0574(15)

c=21.725(4)

alpha=90

beta=107.917(6)

gamma=90

Temperature: 296 K

|                        | Calculated                                     | Reported                                       |
|------------------------|------------------------------------------------|------------------------------------------------|
| Volume                 | 4032.9(11)                                     | 4032.9(11)                                     |
| Space group            | C 2/c                                          | C 2/c                                          |
| Hall group             | -C 2yc                                         | -C 2yc                                         |
| Moiety formula         | C <sub>26</sub> H <sub>18</sub> N <sub>2</sub> | ?                                              |
| Sum formula            | C <sub>26</sub> H <sub>18</sub> N <sub>2</sub> | C <sub>26</sub> H <sub>18</sub> N <sub>2</sub> |
| Mr                     | 358.42                                         | 358.42                                         |
| Dx, g cm <sup>-3</sup> | 1.181                                          | 1.181                                          |
| Z                      | 8                                              | 8                                              |
| Mu (mm <sup>-1</sup> ) | 0.069                                          | 0.069                                          |
| F000                   | 1504.0                                         | 1504.0                                         |
| F000'                  | 1504.52                                        |                                                |
| h, k, lmax             | 22, 11, 25                                     | 22, 11, 25                                     |
| Nref                   | 3533                                           | 3505                                           |
| Tmin, Tmax             | 0.982, 0.985                                   |                                                |
| Tmin'                  | 0.982                                          |                                                |

Correction method= Not given

Data completeness= 0.992

Theta(max)= 24.996

R(reflections)= 0.0456( 1704)

wR2(reflections)= 0.0918( 3505)

S = 0.846

Npar= 253

### 3.7 X-Ray single crystal diffraction analysis of 7bc (CCDC: 2035715)

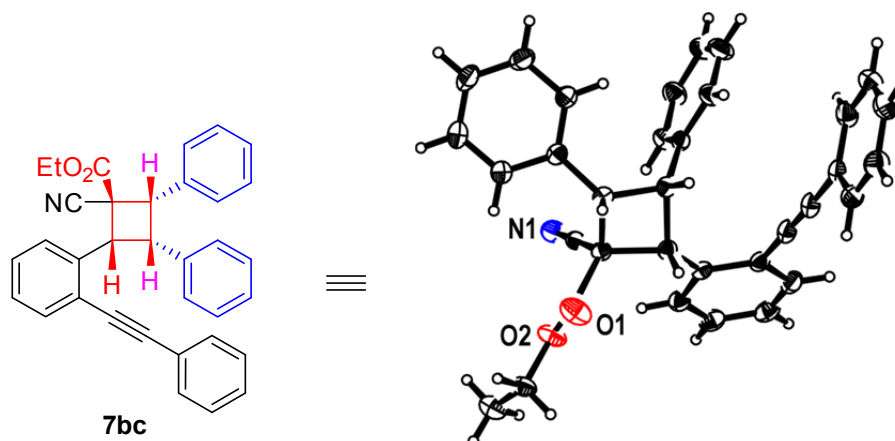

#### Datablock: 1

Bond precision: C-C = 0.0023 Å

Wavelength=0.71073

Cell: a=9.9610 (12)  
alpha=70.640 (2)

b=11.2201 (14)  
beta=86.203 (2)

c=12.7264 (16)  
gamma=74.814 (2)

Temperature: 296 K

|                        | Calculated   | Reported     |
|------------------------|--------------|--------------|
| Volume                 | 1294.7 (3)   | 1294.7 (3)   |
| Space group            | P -1         | P -1         |
| Hall group             | -P 1         | -P 1         |
| Moiety formula         | C34 H27 N O2 | ?            |
| Sum formula            | C34 H27 N O2 | C34 H27 N O2 |
| Mr                     | 481.57       | 481.56       |
| Dx, g cm <sup>-3</sup> | 1.235        | 1.235        |
| Z                      | 2            | 2            |
| Mu (mm <sup>-1</sup> ) | 0.076        | 0.076        |
| F000                   | 508.0        | 508.0        |
| F000'                  | 508.21       |              |
| h, k, lmax             | 11, 13, 15   | 11, 13, 15   |
| Nref                   | 4554         | 4524         |
| Tmin, Tmax             | 0.977, 0.983 |              |
| Tmin'                  | 0.977        |              |

Correction method= Not given

Data completeness= 0.993

Theta(max)= 24.999

R(reflections)= 0.0395 ( 3568)

wR2(reflections)= 0.1214 ( 4524)

S = 0.953

Npar= 334

### 3.8 X-Ray single crystal diffraction analysis of 7bd (CCDC: 2035716)

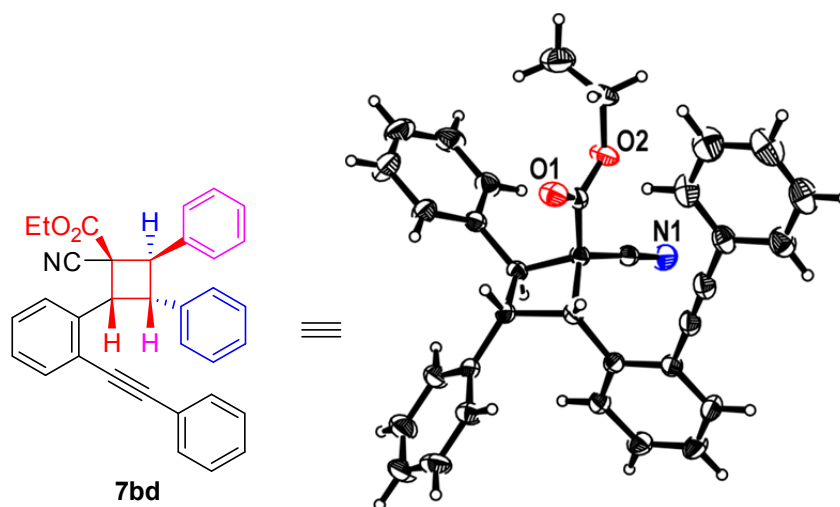

#### Datablock: 1

Bond precision: C-C = 0.0026 Å

Wavelength=0.71073

Cell: a=10.6954(13)

b=23.526(3)

c=11.3878(13)

alpha=90

beta=108.403(2)

gamma=90

Temperature: 296 K

|                        | Calculated                                       | Reported                                         |
|------------------------|--------------------------------------------------|--------------------------------------------------|
| Volume                 | 2718.9(6)                                        | 2718.8(6)                                        |
| Space group            | P 21/n                                           | P 21/n                                           |
| Hall group             | -P 2yn                                           | -P 2yn                                           |
| Moiety formula         | C <sub>34</sub> H <sub>27</sub> N O <sub>2</sub> | ?                                                |
| Sum formula            | C <sub>34</sub> H <sub>27</sub> N O <sub>2</sub> | C <sub>34</sub> H <sub>27</sub> N O <sub>2</sub> |
| Mr                     | 481.57                                           | 481.56                                           |
| Dx, g cm <sup>-3</sup> | 1.176                                            | 1.176                                            |
| Z                      | 4                                                | 4                                                |
| Mu (mm <sup>-1</sup> ) | 0.072                                            | 0.072                                            |
| F <sub>000</sub>       | 1016.0                                           | 1016.0                                           |
| F <sub>000</sub> '     | 1016.42                                          |                                                  |
| h, k, lmax             | 12, 27, 13                                       | 12, 27, 13                                       |
| Nref                   | 4790                                             | 4787                                             |
| Tmin, Tmax             | 0.979, 0.983                                     |                                                  |
| Tmin'                  | 0.979                                            |                                                  |

Correction method= Not given

Data completeness= 0.999

Theta(max)= 24.999

R(reflections)= 0.0426( 3440)

wR2(reflections)= 0.1141( 4787)

S = 1.044

Npar= 334

### 3.9 X-Ray single crystal diffraction analysis of 7be (CCDC: 2035717)

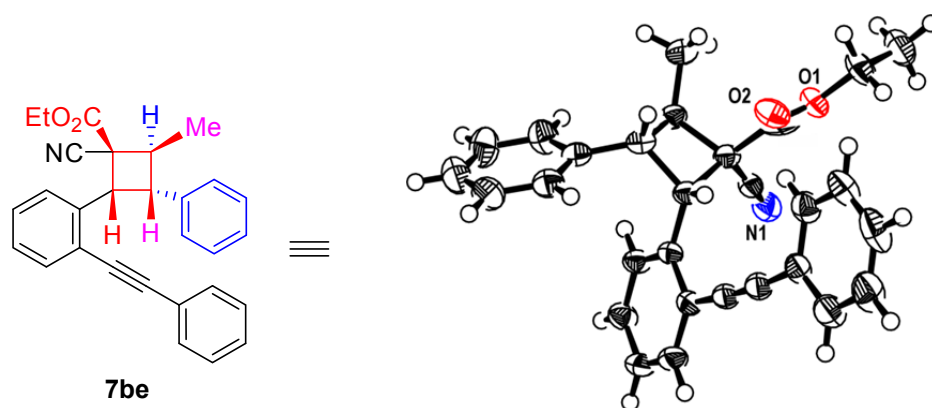

#### Datablock: 1

Bond precision: C-C = 0.0032 Å      Wavelength=0.71073

Cell:                    a=17.274 (2)      b=17.574 (2)      c=17.610 (2)  
                              alpha=90            beta=119.159 (2)      gamma=90

Temperature:            100 K

|                        | Calculated   | Reported      |
|------------------------|--------------|---------------|
| Volume                 | 4668.4 (9)   | 4668.7 (10)   |
| Space group            | P 21/c       | P 21/c        |
| Hall group             | -P 2ybc      | -P 2ybc       |
| Moiety formula         | C29 H25 N O2 | ?             |
| Sum formula            | C29 H25 N O2 | C58 H50 N2 O4 |
| Mr                     | 419.50       | 839.00        |
| Dx, g cm <sup>-3</sup> | 1.194        | 1.194         |
| Z                      | 8            | 4             |
| Mu (mm <sup>-1</sup> ) | 0.074        | 0.074         |
| F000                   | 1776.0       | 1776.0        |
| F000'                  | 1776.74      |               |
| h,k,lmax               | 20,20,20     | 20,20,20      |
| Nref                   | 8216         | 8195          |
| Tmin,Tmax              | 0.981,0.982  |               |
| Tmin'                  | 0.981        |               |

Correction method= Not given

Data completeness= 0.997      Theta(max) = 25.000

R(reflections)= 0.0476 ( 4844)      wR2(reflections)= 0.1258 ( 8195)

S = 0.811      Npar= 581

### 3.10 X-Ray single crystal diffraction analysis of 8aa (CCDC: 2035718)

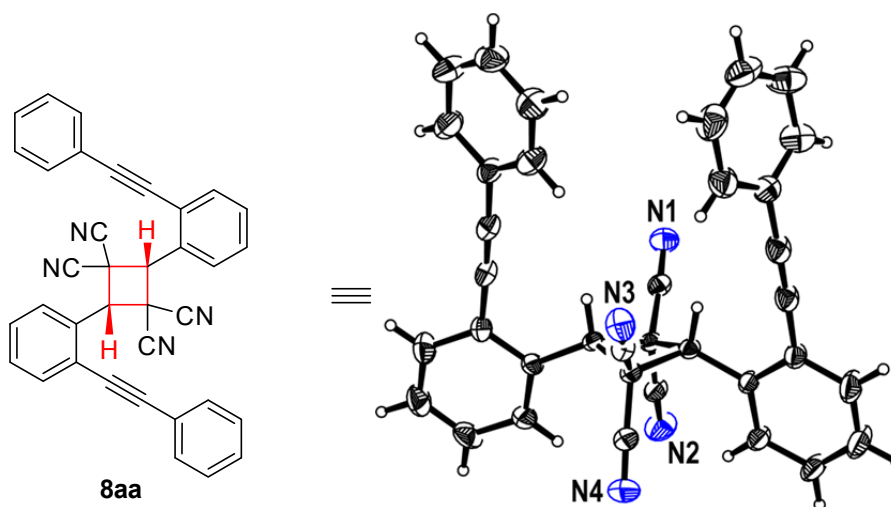

#### Datablock: 1

|                        |                                                |                                                |                          |
|------------------------|------------------------------------------------|------------------------------------------------|--------------------------|
| Bond precision:        | C-C = 0.0047 Å                                 | Wavelength=0.71073                             |                          |
| Cell:                  | a=10.4403 (13)<br>alpha=90                     | b=21.619 (3)<br>beta=100.287 (3)               | c=25.312 (3)<br>gamma=90 |
| Temperature:           | 296 K                                          |                                                |                          |
|                        | Calculated                                     | Reported                                       |                          |
| Volume                 | 5621.3 (12)                                    | 5621.2 (12)                                    |                          |
| Space group            | P 21/c                                         | P 21/c                                         |                          |
| Hall group             | -P 2ybc                                        | -P 2ybc                                        |                          |
| Moiety formula         | C <sub>36</sub> H <sub>20</sub> N <sub>4</sub> | C <sub>36</sub> H <sub>20</sub> N <sub>4</sub> |                          |
| Sum formula            | C <sub>36</sub> H <sub>20</sub> N <sub>4</sub> | C <sub>36</sub> H <sub>20</sub> N <sub>4</sub> |                          |
| Mr                     | 508.56                                         | 508.56                                         |                          |
| Dx, g cm <sup>-3</sup> | 1.202                                          | 1.202                                          |                          |
| Z                      | 8                                              | 8                                              |                          |
| Mu (mm <sup>-1</sup> ) | 0.072                                          | 0.072                                          |                          |
| F000                   | 2112.0                                         | 2112.0                                         |                          |
| F000'                  | 2112.73                                        |                                                |                          |
| h, k, lmax             | 12, 25, 30                                     | 12, 25, 30                                     |                          |
| Nref                   | 10022                                          | 10008                                          |                          |
| Tmin, Tmax             | 0.975, 0.980                                   | 0.898, 0.908                                   |                          |
| Tmin'                  | 0.975                                          |                                                |                          |
| Correction method=     | # Reported T Limits: Tmin=0.898 Tmax=0.908     |                                                |                          |
| AbsCorr =              | MULTI-SCAN                                     |                                                |                          |
| Data completeness=     | 0.999                                          | Theta(max)= 25.099                             |                          |
| R(reflections)=        | 0.0593 ( 5296)                                 | wR2(reflections)= 0.1756 ( 10008)              |                          |
| S =                    | 1.004                                          | Npar= 709                                      |                          |

### 3.11 X-Ray single crystal diffraction analysis of 9aa (CCDC: 2035719)

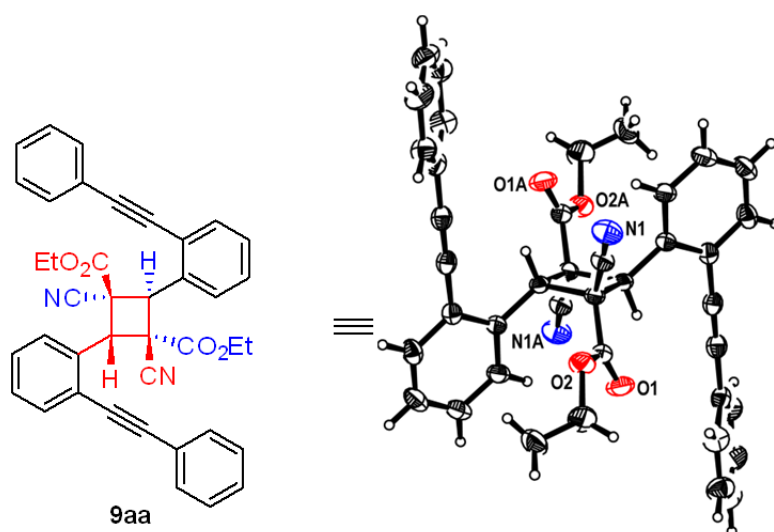

#### Datablock: 1

|                              |                |                                  |              |
|------------------------------|----------------|----------------------------------|--------------|
| Bond precision:              | C-C = 0.0024 Å | Wavelength=0.71073               |              |
| Cell:                        | a=11.2244 (19) | b=12.002 (2)                     | c=11.899 (2) |
|                              | alpha=90       | beta=93.971 (3)                  | gamma=90     |
| Temperature:                 | 296 K          |                                  |              |
|                              | Calculated     | Reported                         |              |
| Volume                       | 1599.1 (5)     | 1599.0 (5)                       |              |
| Space group                  | P 21/n         | P 21/n                           |              |
| Hall group                   | -P 2yn         | -P 2yn                           |              |
| Moiety formula               | C40 H28 N2 O4  | ?                                |              |
| Sum formula                  | C40 H28 N2 O4  | C20 H14 N O2                     |              |
| Mr                           | 600.64         | 300.32                           |              |
| Dx, g cm <sup>-3</sup>       | 1.247          | 1.247                            |              |
| Z                            | 2              | 4                                |              |
| Mu (mm <sup>-1</sup> )       | 0.081          | 0.081                            |              |
| F000                         | 628.0          | 628.0                            |              |
| F000'                        | 628.28         |                                  |              |
| h, k, lmax                   | 13, 14, 14     | 13, 14, 14                       |              |
| Nref                         | 2982           | 2973                             |              |
| Tmin, Tmax                   | 0.978, 0.979   |                                  |              |
| Tmin'                        | 0.978          |                                  |              |
| Correction method= Not given |                |                                  |              |
| Data completeness=           | 0.997          | Theta(max)= 25.497               |              |
| R(reflections)=              | 0.0465 ( 2220) | wR2(reflections)= 0.1511 ( 2973) |              |
| S =                          | 0.930          | Npar= 220                        |              |

#### 4. Further optimization of the reaction conditions (Table S1)

**Table S1. Optimization of the photocatalyst and time on the reaction<sup>a</sup>**

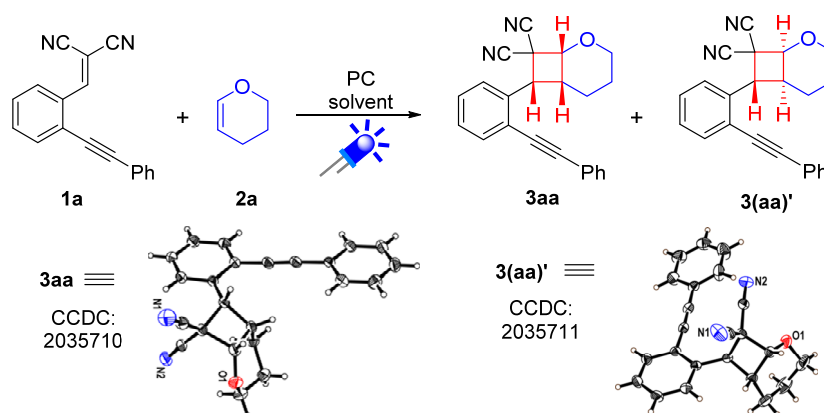

| entry    | photocatalyst (PC)                                 | <b>2a</b> (equiv.) | light source (nm) | solvent | time (h) | yield (%) <sup>b</sup><br><b>3aa/3(aa)'</b> <sup>c</sup> |
|----------|----------------------------------------------------|--------------------|-------------------|---------|----------|----------------------------------------------------------|
| 1        | <i>fac</i> -Ir(ppy) <sub>3</sub>                   | 2.0                | 380–385           | DCE     | 8        | 27/4                                                     |
| 2        | Ru(bpy) <sub>3</sub> Cl <sub>2</sub>               | 2.0                | 450–455           | DCE     | 8        | 29/4                                                     |
| 3        | Mes-Acr <sup>+</sup> ClO <sub>4</sub> <sup>-</sup> | 2.0                | 420–425           | DCE     | 8        | 28/4                                                     |
| 4        | TPPT                                               | 2.0                | 410–415           | DCE     | 8        | 35/5                                                     |
| 5        | rose bengal                                        | 2.0                | 530–535           | DCE     | 8        | 28/4                                                     |
| 6        | eosin Y                                            | 2.0                | 530–535           | DCE     | 8        | 15/trace                                                 |
| <b>7</b> | –                                                  | <b>55 (1.0 mL)</b> | <b>410–415</b>    | –       | <b>8</b> | <b>79/11</b>                                             |
| 8        | –                                                  | 55 (1.0 mL)        | 410–415           | –       | 2        | 29/4                                                     |
| 9        | –                                                  | 55 (1.0 mL)        | 410–415           | –       | 4        | 43/6                                                     |
| 10       | –                                                  | 55 (1.0 mL)        | 410–415           | –       | 6        | 64/9                                                     |
| 11       | –                                                  | 55 (1.0 mL)        | 410–415           | –       | 10       | 79/11                                                    |
| 12       | –                                                  | 55 (1.0 mL)        | 410–415           | –       | 12       | 79/11                                                    |
| 13       | –                                                  | 55 (1.0 mL)        | 410–415           | –       | 20       | 72/10                                                    |

<sup>a</sup>Reaction conditions: **1a** (0.20 mmol), **2a** (0.40 mmol), PC (2.5 mol%), DCE (1.0 mL), room temperature, air, under LED irradiation for the time indicated in Table S1. <sup>b</sup>Yield of isolated product. TPPT = 2,4,6-triphenylpyrylium tetrafluoroborate.



## 5. Mechanistic investigations

### 5.1 The UV/Vis absorption spectra of **1a**, **1a'**, **1a''** and **1-III**

The UV/Vis absorption spectra of 2-(2-(phenylethynyl)benzylidene) malononitrile **1a** (0.1 M, 0.05 M, 0.025 M), 2-(3-(phenylethynyl)benzylidene) malononitrile **1a'** (0.1 M, 0.05 M, 0.025 M) and 2-(4-(phenylethynyl)benzylidene) malononitrile **1a''** (0.1 M, 0.05 M, 0.025 M) in 1,2-dichloroethane were recorded in 1 cm path quartz cuvettes by using a UV-Visible U-4100 spectrophotometer. The obtained charge-transfer bands in UV/vis absorption spectra were shown in Figures S1, S2, and S3. In addition, the UV/Vis absorption spectra comparison of **1-III** in 1,2-dichloroethane was shown in Figure S4.

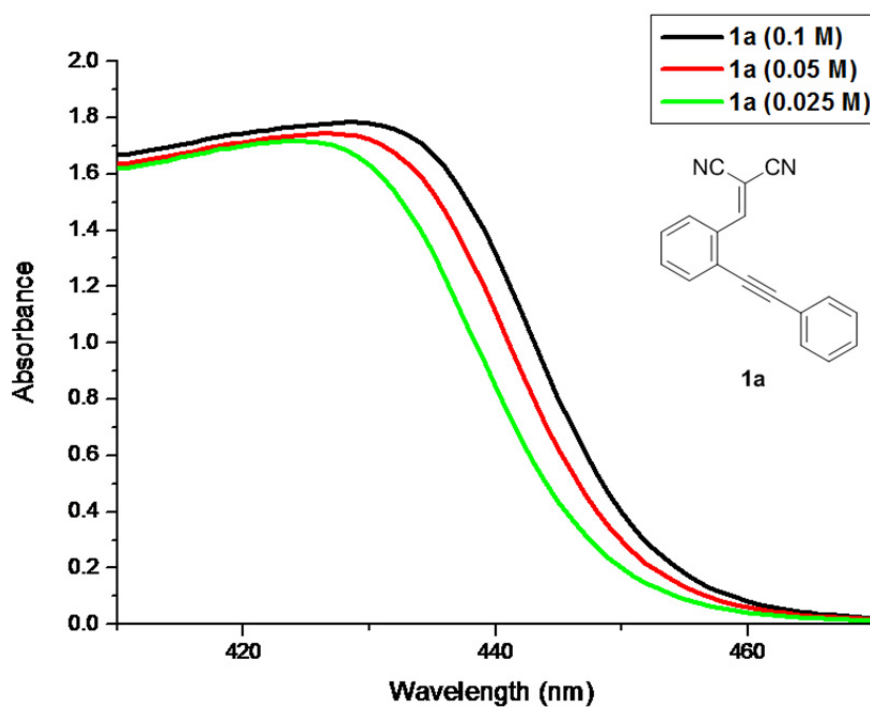

**Figure S1.** Absorption spectra of **1a** in DCE

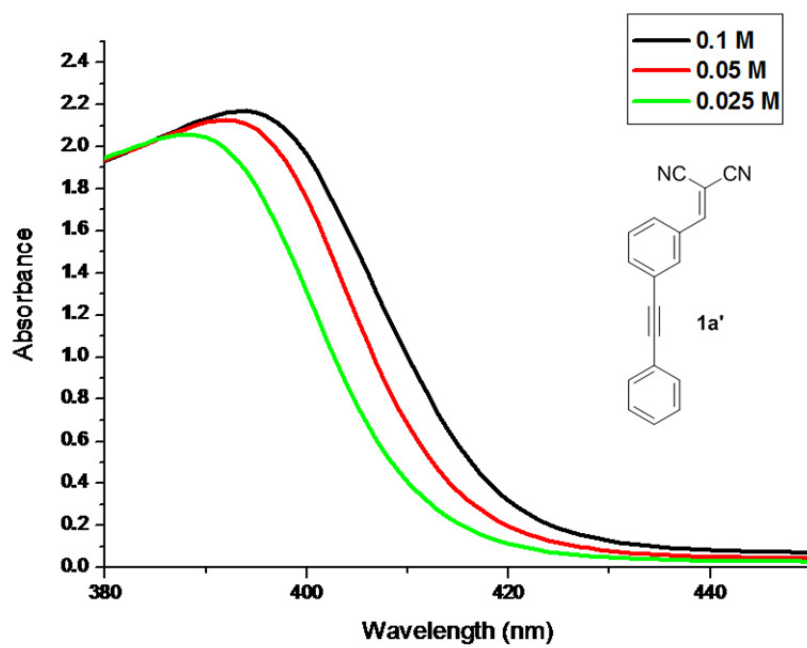

Figure S2. Absorption spectra of 1a' in DCE

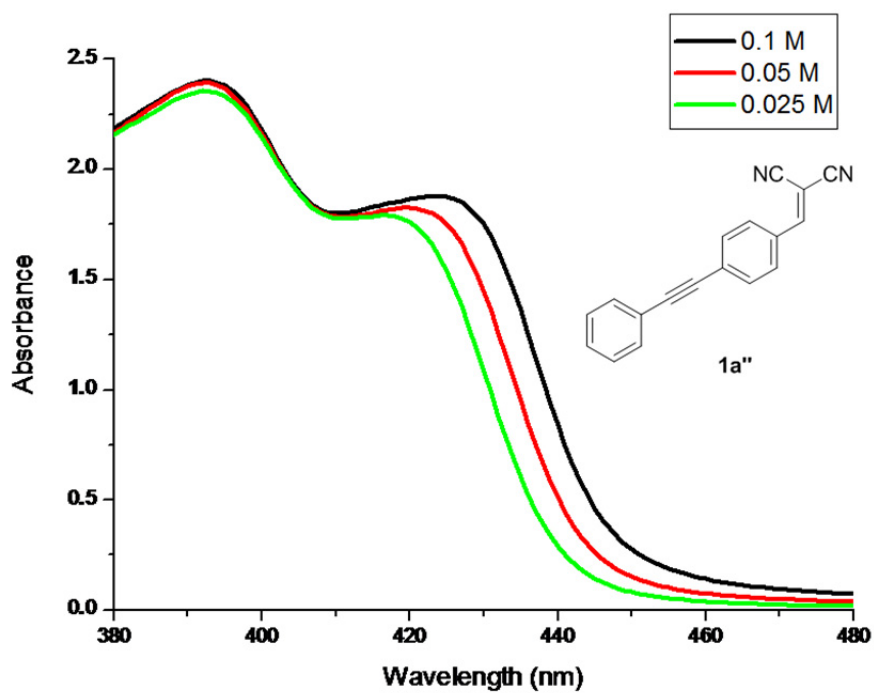

Figure S3. Absorption spectra of 1a'' in DCE

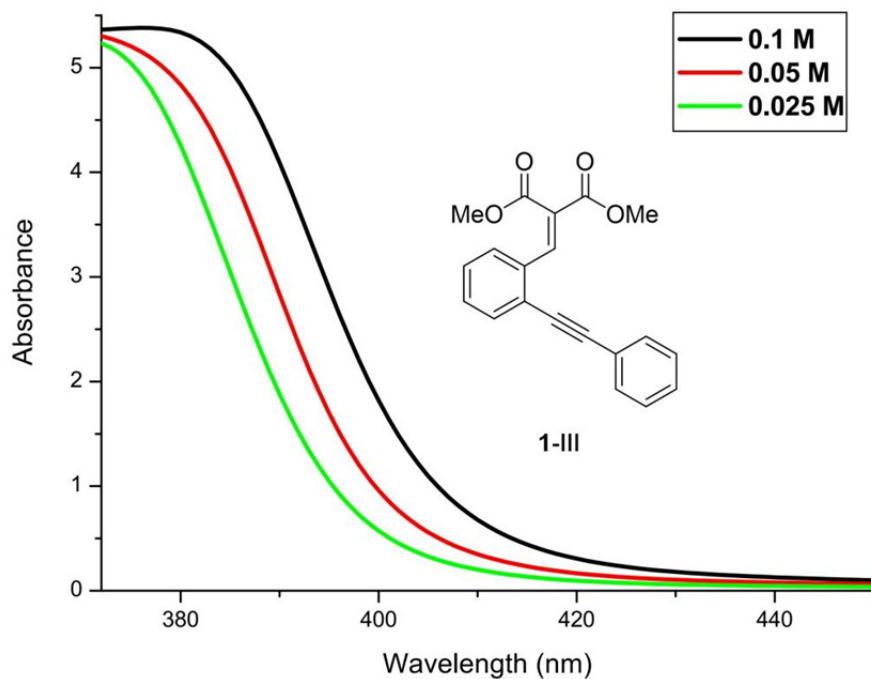

**Figure S4.** Absorption spectra of **1-III** in DCE

## 5.2 Fluorescence quenching experiment of **1a** with **2a**

To further elucidate the possible reaction pathway, fluorescence quenching experiment was performed. The fluorescence emission intensity was recorded on the Cary Eclipse Fluorescence Spectrometer with the excitation wavelength was fixed at 380 nm, and the fluorescence quenching result of 2-(2-(phenylethynyl)benzylidene)malononitrile (**1a**, 50.9 mg, 0.20 mmol in 2.0 mL DCE) by the addition of 3,4-dihydro-2*H*-pyran (**2a**, 2.0 equiv., 4.0 equiv. and 6.0 equiv.) was shown in Figure S5.

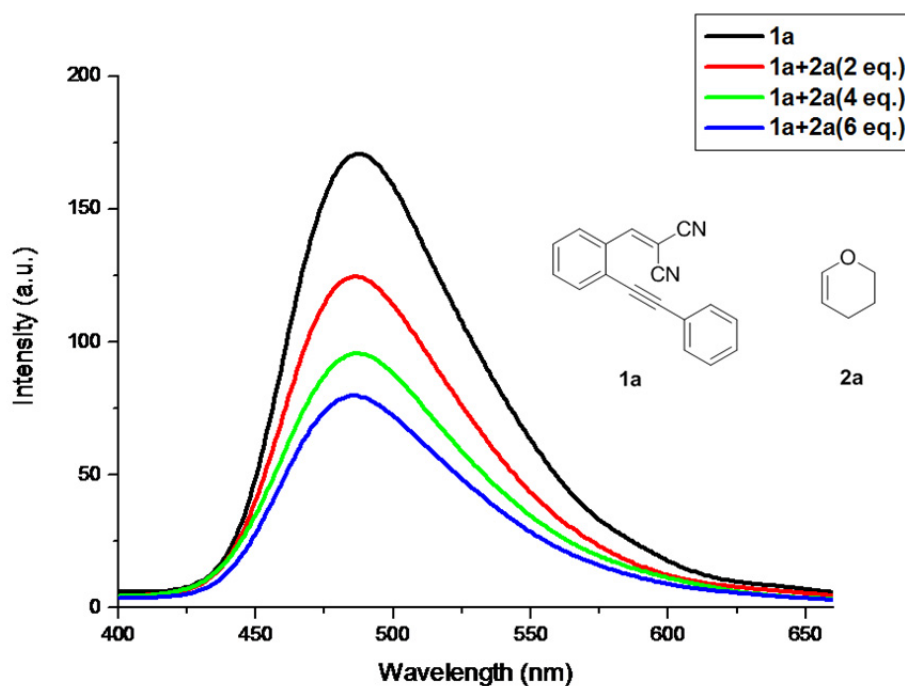

**Figure S5.** Fluorescence quenching experiment of **1a** with **2a**

### 5.3 Cyclic voltammetry measurements of **1a** and **2a** under visible light irradiation

Cyclic voltammetry measurements of **1a** and **2a** were performed in a three-electrode cell system under air at room temperature. The working electrode was a steady glassy carbon disk electrode, the counter electrode a platinum wire. The reference was an Ag/AgCl electrode submerged in saturated aqueous KCl solution, and separated from reaction by a salt bridge. DCE (5.0 mL) containing 0.25 M *n*-Bu<sub>4</sub>NBF<sub>6</sub> was poured into the electrochemical cell in the samples of **1a** (0.50 mmol), **2a** (0.50 mmol), and **1a/2a** (0.50 mmol/0.50 mmol), respectively. Under the irradiation of blue LED (410–415 nm, 3 W) for 1 h, the samples were scanned at rate of 0.1 V/s ranging from 1.0 V to 4.0 V, and the corresponding cyclic voltammetry curves were recorded, as shown in Figure S6. It can be seen from Figure S6 that

there is no redox process between **1a** and **2a** under the present reaction conditions.

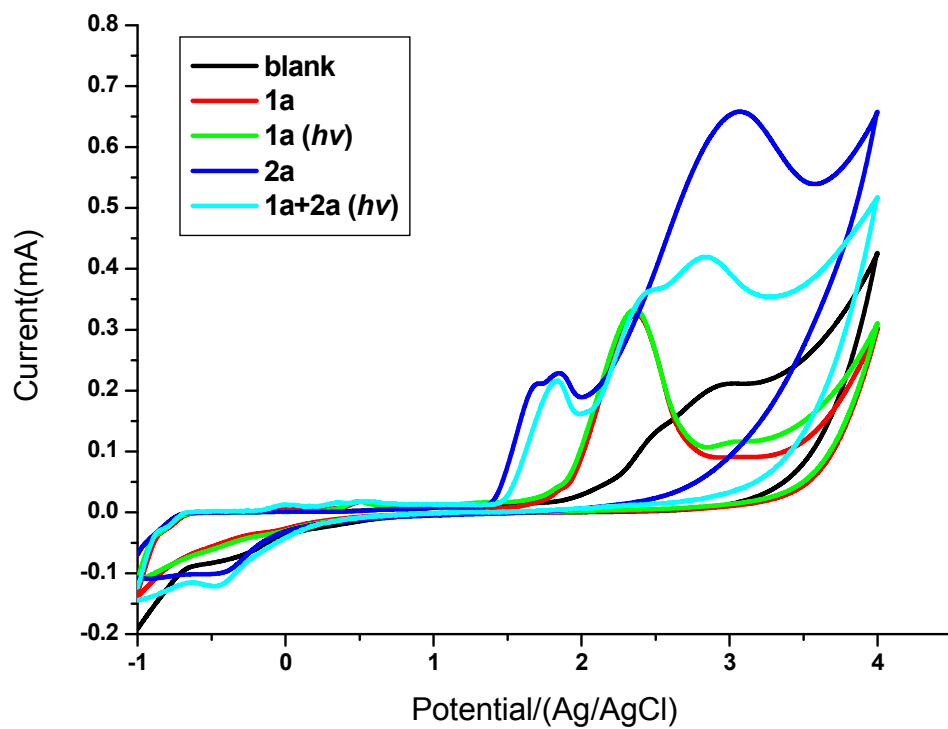

**Figure S6.** Cyclic voltammetry curves

## 5.4 The trapping experiments of key intermediates

### 5.4.1 The trapping experiment of key intermediate **Int1** using BHT

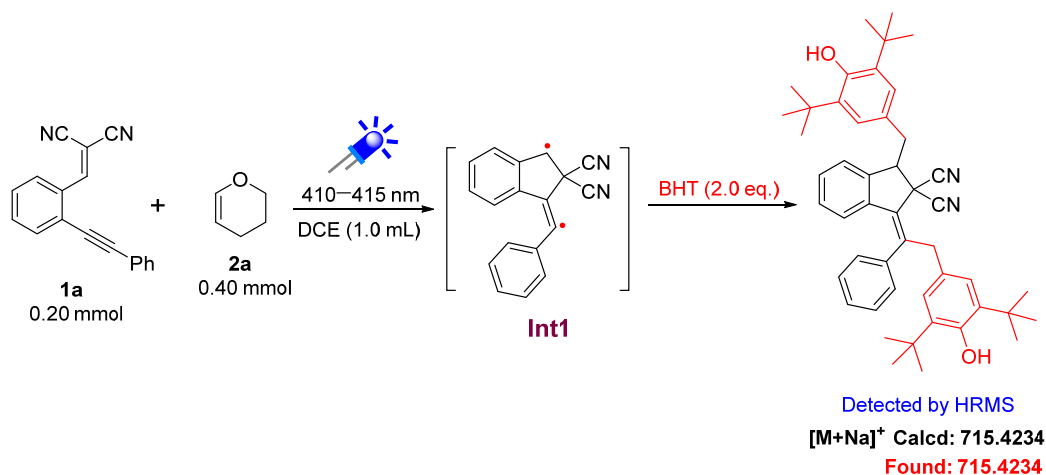

A 5 mL oven-dried reaction vessel equipped with a magnetic stirrer bar was charged with 2-(2-(phenylethynyl)benzylidene)malononitrile (**1a**, 50.9 mg, 0.20 mmol), 3,4-dihydro-2*H*-pyran (**2a**, 0.40 mmol) in DCE (1.0 mL), and 2,6-di-*tert*-butyl-4-methylphenol (BHT, 88.2 mg, 0.40 mmol) as a free-radical trapping reagent was added. The reaction vessel was exposed to blue LED (410–415 nm, 3 W) irradiation at room temperature in air with stirring for 8 h. After the reaction, their corresponding adduct was detected by HRMS analysis (Figure S7).

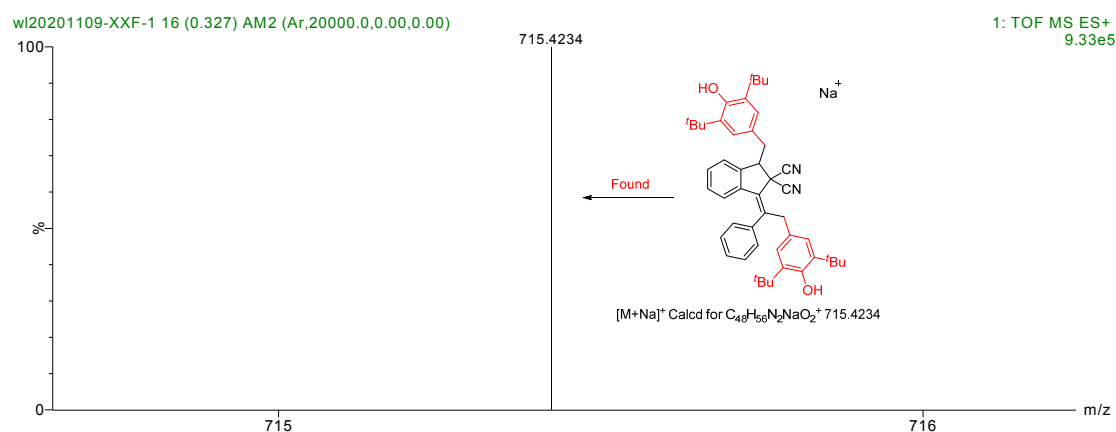

**Figure S7.** HRMS analysis of the **Int1** adduct with BHT

## 5.4.2 The trapping experiment of key intermediate **Int3** using ethyl diazoacetate

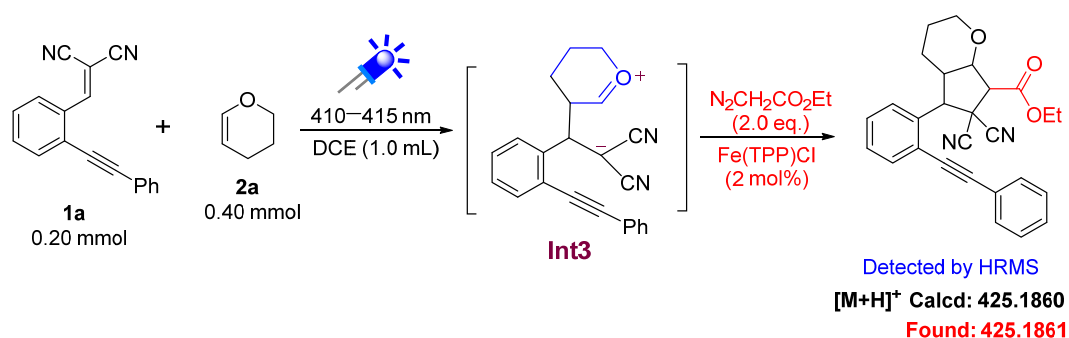

A 5 mL oven-dried reaction vessel equipped with a magnetic stirrer bar was charged with 2-(2-(phenylethynyl)benzylidene)malononitrile (**1a**, 50.9 mg, 0.20 mmol), 3,4-dihydro-2*H*-pyran (**2a**, 33.6 mg, 0.40 mmol) in DCE (1.0 mL), and ethyl diazoacetate (0.40 mmol) with Fe(TPP)Cl (0.0040 mmol, 2 mol%) as a carbanion capturing agent was added. The reaction vessel was exposed to blue LED (410–415 nm, 3 W) irradiation at room temperature in air with stirring for 8 h. After the reaction, their corresponding adduct was detected by HRMS analysis (Figure S8).

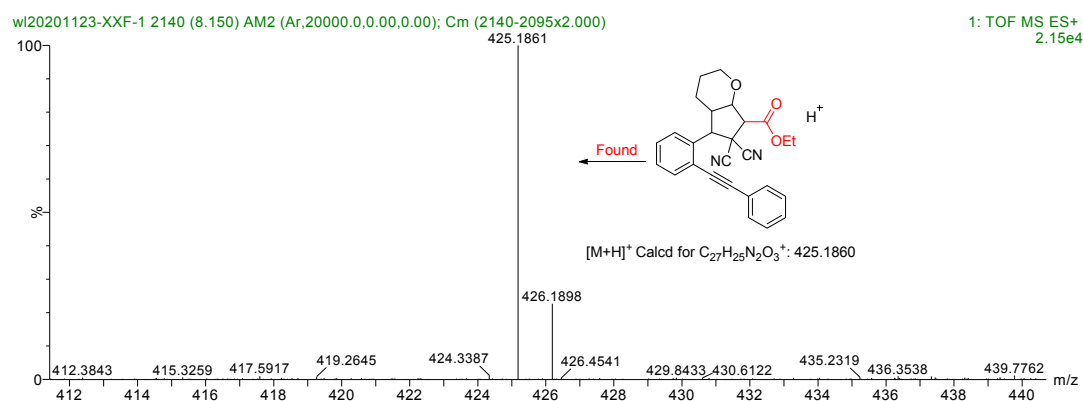

**Figure S8.** HRMS analysis of the **Int3** adduct with ethyl diazoacetate

## 6. The possible stereoisomers of [2+2]-cycloaddition products

In theory, a crossed [2+2] cycloaddition of two different asymmetric chain olefins can yield sixteen head-to-head and sixteen head-to-tail stereoisomers (Scheme S1). As outlined above, the major products in all cases were found to be the ( $\pm$ )-(*trans,trans*)-*anti*-head-to-head (**I**) isomer derived from an electron-poor and an electron-rich olefin. Importantly, only head-to-head isomers were found and no head-to-tail isomers were observed, illustrating the regioselectivity of the reaction. Moreover, among the isolated head-to-head isomers, **I** was obtained in the majority and ( $\pm$ )-(*trans,cis*)-*syn*-head-to-head (**VI = I'**) was isolated in the minority with good diastereoselectivity, demonstrating almost no geometric isomerization of the olefins during the [2+2]-cycloaddition.

**Scheme S1. The possible stereoisomers of [2+2]-cycloaddition products**

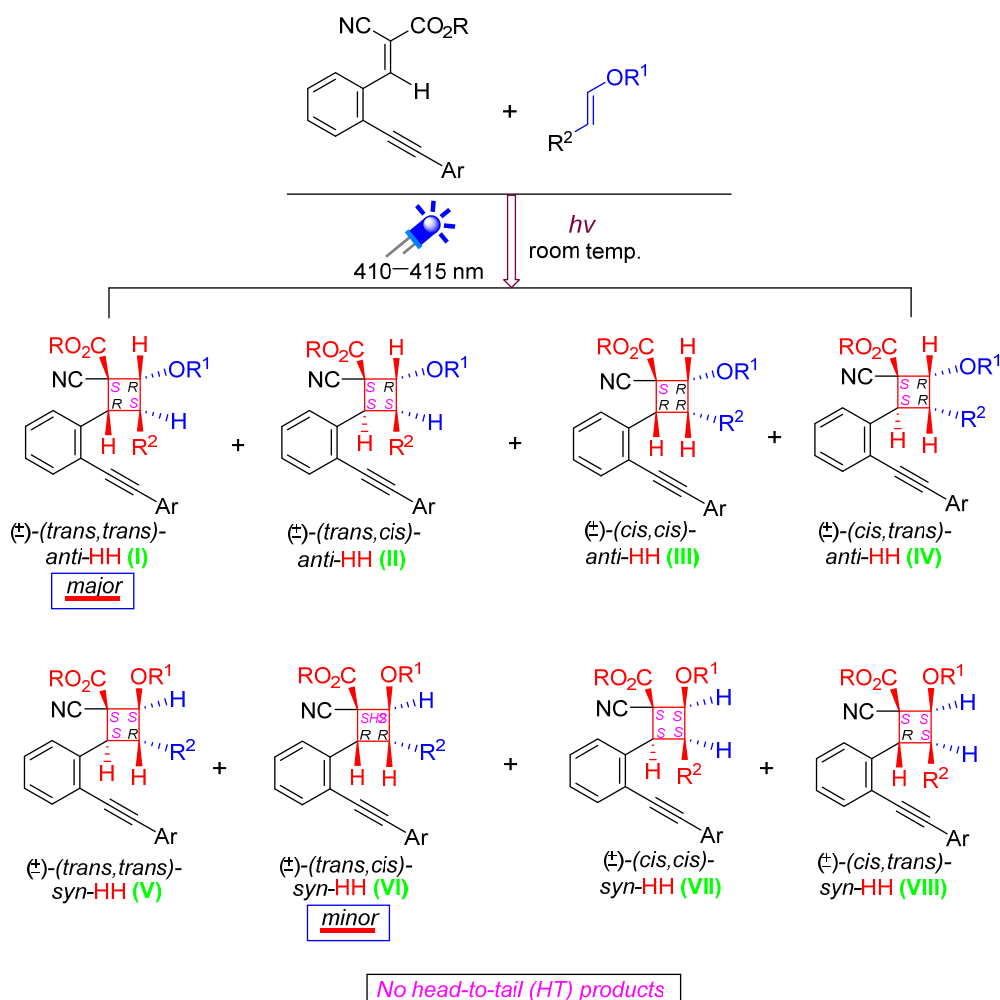



## 7. DFT calculations for the [2+2] cross-cycloaddition of 1a and 2a

All density functional theory (DFT) calculations were carried out using the M06-D3 functional<sup>[1]</sup> (with Grimme's D3 dispersion<sup>[2]</sup>) and performed in the Gaussian 16 program.<sup>[3]</sup> The def2-SVP<sup>[4]</sup> basis set was used for geometry optimization. Analytical frequency calculations were implemented on all the optimized structures at the same level of theory, to identify all the stationary point as minima (zero imaginary frequency) or transition states (one imaginary frequency) and to obtain Gibbs free energy corrections at 298 K. The final and solvation energies for the fully optimized structures in the dichloromethane were calculated by employing the SMD continuum solvation model<sup>[5]</sup> with the larger def2-TZVPP<sup>[6]</sup> basis set. The basis set information is downloaded from the website.<sup>[7]</sup>

### References

- [1] Y. Zhao, D. G. Truhlar, *Theor. Chem. Acc.* **2008**, *120*, 215-241.
- [2] S. Grimme, *J. Comput. Chem.* **2006**, *27*, 1787-1799.
- [3] M. J. Frisch, G. W. Trucks, H. B. Schlegel, G. E. Scuseria, M. A. Robb, J. R. Cheeseman, G. Scalmani, V. Barone, G. A. Petersson, H. Nakatsuji, X. Li, M. Caricato, A. V. Marenich, J. Bloino, B. G. Janesko, R. Gomperts, B. Mennucci, H. P. Hratchian, J. V. Ortiz, A. F. Izmaylov, J. L. Sonnenberg, Williams, F. Ding, F. Lipparini, F. Egidi, J. Goings, B. Peng, A. Petrone, T. Henderson, D. Ranasinghe, V. G. Zakrzewski, J. Gao, N. Rega, G. Zheng, W. Liang, M. Hada, M. Ehara, K. Toyota, R. Fukuda, J. Hasegawa, M. Ishida, T. Nakajima, Y. Honda, O. Kitao, H. Nakai, T. Vreven, K. Throssell, J. A. Montgomery Jr., J. E. Peralta, F. Ogliaro, M. J. Bearpark, J. J. Heyd, E. N. Brothers, K. N. Kudin, V. N. Staroverov, T. A. Keith, R. Kobayashi, J. Normand, K. Raghavachari, A. P. Rendell, J. C. Burant, S. S. Iyengar, J. Tomasi, M. Cossi, J. M. Millam, M. Klene, C. Adamo, R. Cammi, J. W. Ochterski, R. L. Martin, K. Morokuma, O. Farkas, J. B. Foresman, D. J. Fox, Gaussian Inc.: Wallingford, CT, **2016**.
- [4] F. Weigend, R. Ahlrichs, *Phys. Chem. Chem. Phys.* **2005**, *7*, 3297-3305.
- [5] A. V. Marenich, C. J. Cramer, D. G. Truhlar, *J. Phys. Chem. B* **2009**, *113*, 6378-6396.
- [6] F. Weigend, *Phys. Chem. Chem. Phys.* **2006**, *8*, 1057-1065.
- [7] (a) B. P. Pritchard, D. Altarawy, B. Didier, T. D. Gibson, T. L. Windus, *J. Chem. Inf. Model.* **2019**, *59*, 4814-4820. (b) <http://www.basissetexchange.org/>

## 7.1 Computational structures

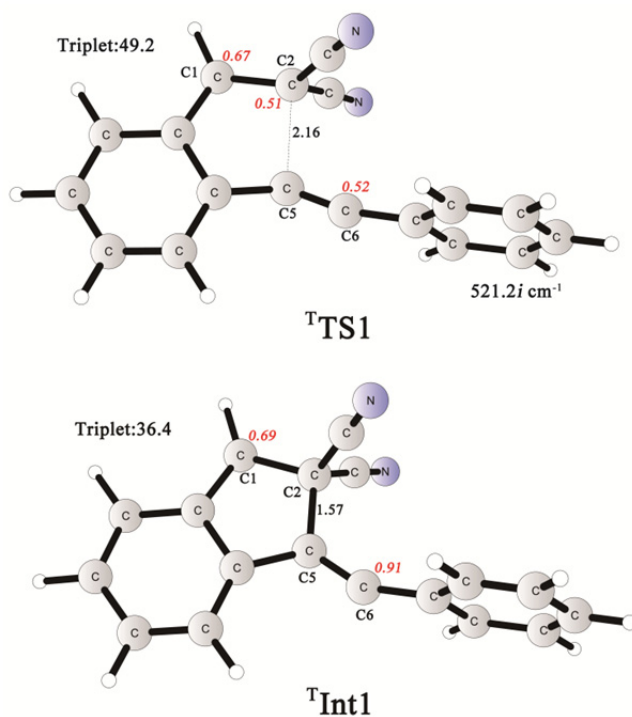

**Figure S9.** Optimized structures of  $\text{TS1}$ ,  $\text{Int1}$  (Distances are given in Å. Spin densities on selected atoms are indicated in red italics. Superscripts indicate the multiplicity of the structures)

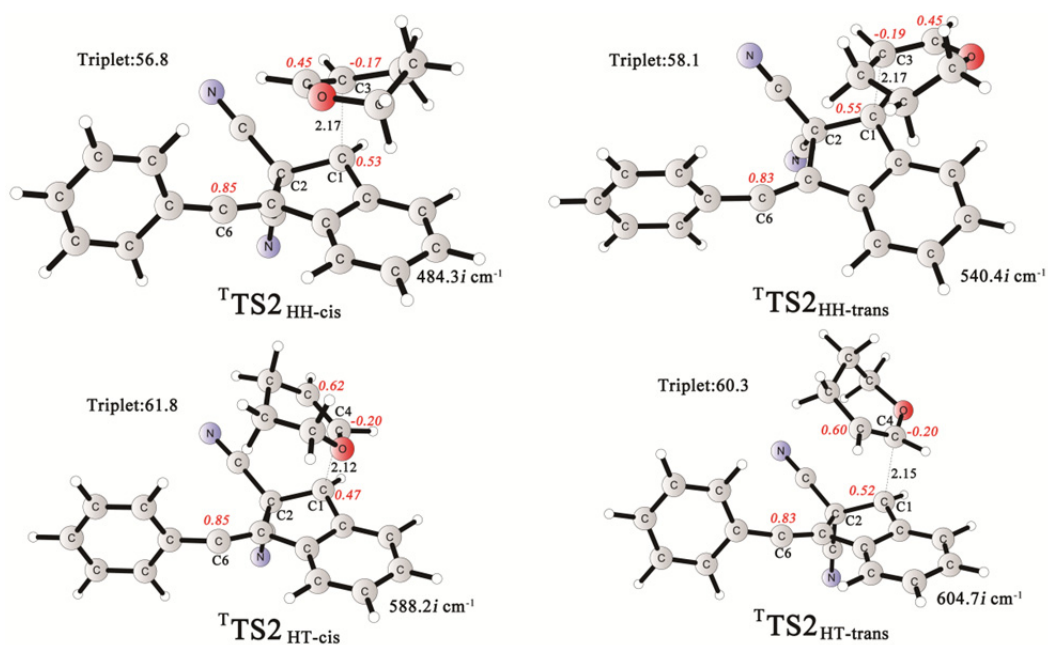

**Figure S10.** Optimized structures of  $\text{TS2}_{\text{HH-cis}}$ ,  $\text{TS2}_{\text{HH-trans}}$ ,  $\text{TS2}_{\text{HT-cis}}$  and  $\text{TS2}_{\text{HT-trans}}$  (Distances are given in Å. Spin densities on selected atoms are indicated in red italics)

Superscripts indicate the multiplicity of the structures. The imaginary frequencies for transition states are also shown.

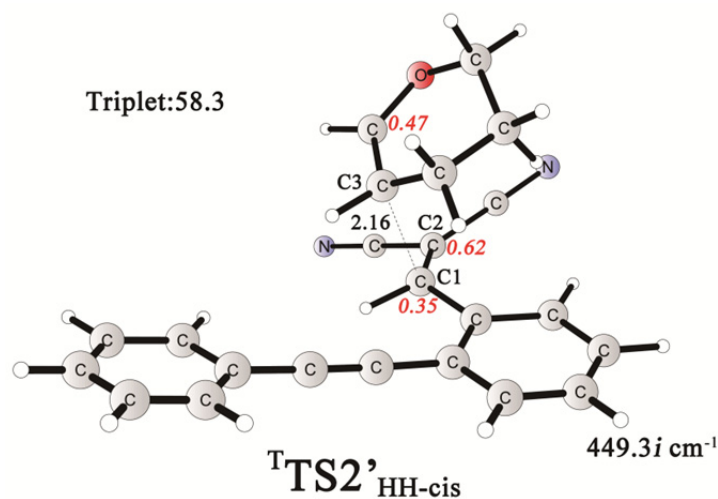

**Figure S11.** Optimized structures of  $\text{TS2}'_{\text{HH-cis}}$  (Distances are given in Å. Spin densities on selected atoms are indicated in red italics. Superscripts indicate the multiplicity of the structures)

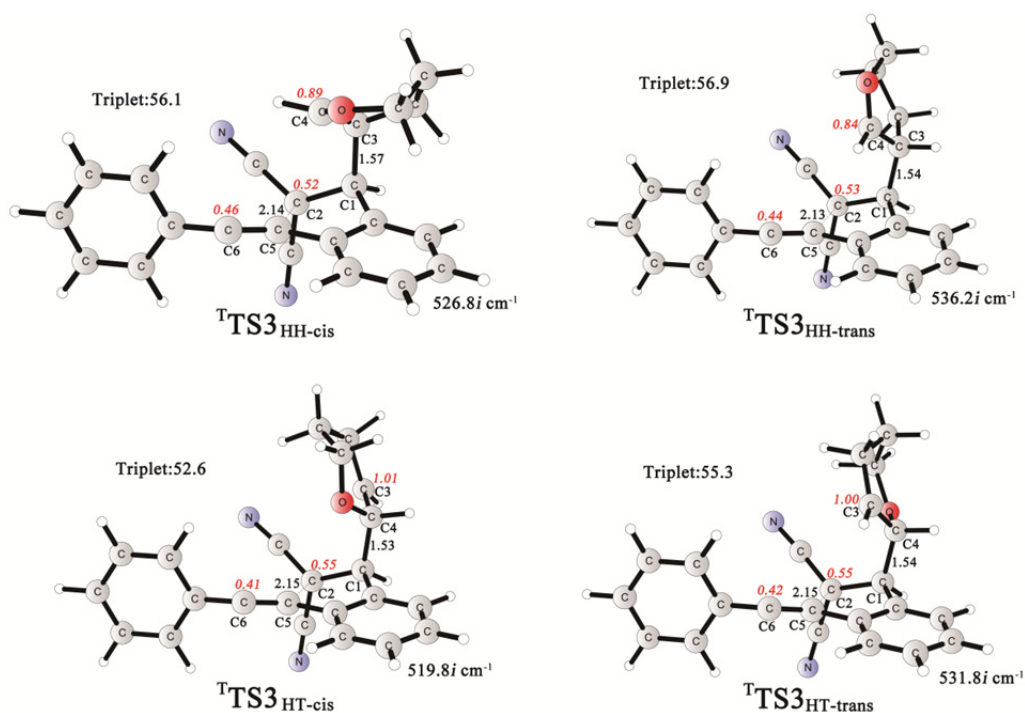

**Figure S12.** Optimized structures of  $\text{TS3}_{\text{HH-cis}}$ ,  $\text{TS3}_{\text{HH-trans}}$ ,  $\text{TS3}_{\text{HT-cis}}$  and  $\text{TS}_{\text{HT-trans}}$  (Distances are given in Å. Spin densities on selected atoms are indicated in red italics. Superscripts indicate the multiplicity of the structures. The imaginary frequencies for transition states are also shown.)

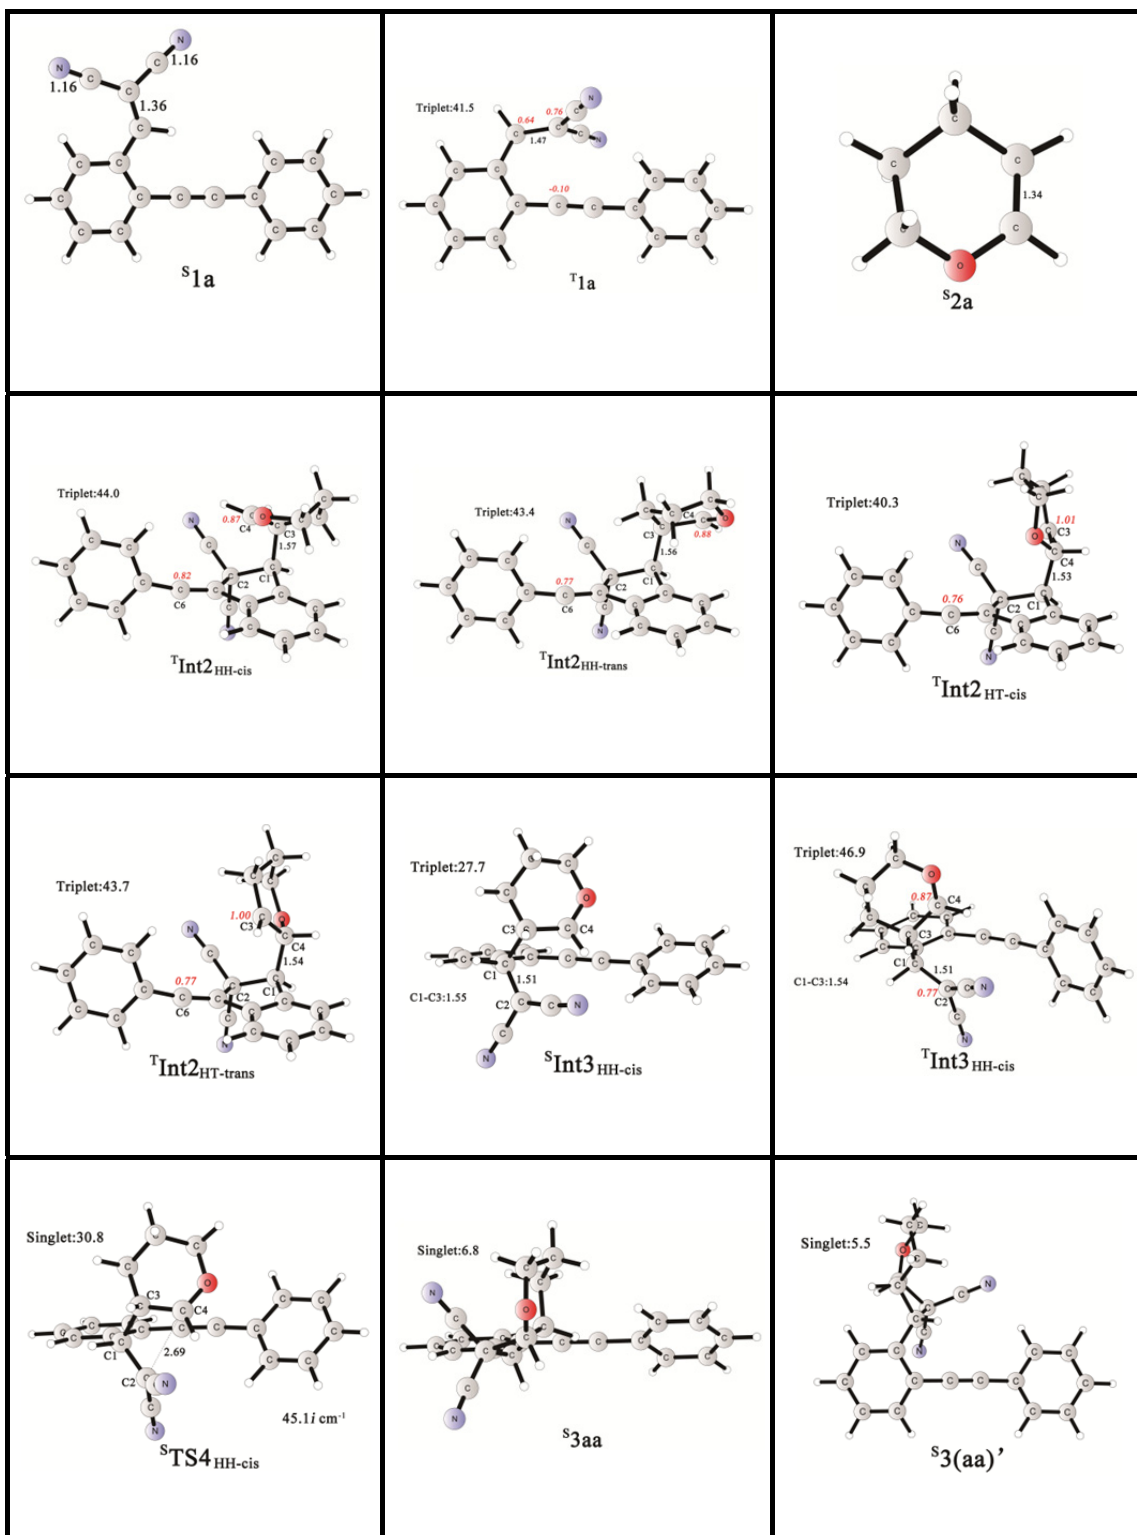

## 6.2 Calculated energies (Table S2)

**Table S2. Calculated energies in Hartree and imaginary frequencies**

| Stationary point                      | Geometry optimization energy | Gibbs energy correction energy | Large basis energy | Imaginary frequencies |
|---------------------------------------|------------------------------|--------------------------------|--------------------|-----------------------|
| <sup>S</sup> 1a                       | -800.1491078                 | 0.17435                        | -801.0534516       |                       |
| <sup>T</sup> 1a                       | -800.0825673                 | 0.170151                       | -800.9831834       |                       |
| <sup>S</sup> 2a                       | -270.1541718                 | 0.093198                       | -270.4654954       |                       |
| <sup>T</sup> TS1                      | -800.0722321                 | 0.17202                        | -800.9727379       | 521.2 <i>i</i>        |
| <sup>T</sup> Int1                     | -800.0975839                 | 0.172406                       | -800.9935537       |                       |
| <sup>T</sup> TS2 <sub>HH-cis</sub>    | -1070.251336                 | 0.28926                        | -1071.450099       | 484.3 <i>i</i>        |
| <sup>T</sup> TS2' <sub>HH-cis</sub>   | -1070.239978                 | 0.286748                       | -1071.445166       | 449.3 <i>i</i>        |
| <sup>T</sup> TS2 <sub>HH-trans</sub>  | -1070.248466                 | 0.287897                       | -1071.44677        | 540.4 <i>i</i>        |
| <sup>T</sup> TS2 <sub>HT-cis</sub>    | -1070.243688                 | 0.288427                       | -1071.441337       | 588.2 <i>i</i>        |
| <sup>T</sup> TS2 <sub>HT-trans</sub>  | -1070.245195                 | 0.287819                       | -1071.443048       | 604.7 <i>i</i>        |
| <sup>T</sup> Int2 <sub>HH-cis</sub>   | -1070.275993                 | 0.291296                       | -1071.472514       |                       |
| <sup>T</sup> Int2 <sub>HH-trans</sub> | -1070.279219                 | 0.291778                       | -1071.473968       |                       |
| <sup>T</sup> Int2 <sub>HT-cis</sub>   | -1070.280389                 | 0.289309                       | -1071.476434       |                       |
| <sup>T</sup> Int2 <sub>HT-trans</sub> | -1070.277859                 | 0.291104                       | -1071.47283        |                       |
| <sup>T</sup> TS3 <sub>HH-cis</sub>    | -1070.250967                 | 0.289948                       | -1071.451959       | 526.8 <i>i</i>        |
| <sup>T</sup> TS3 <sub>HH-trans</sub>  | -1070.249982                 | 0.290511                       | -1071.451208       | 536.2 <i>i</i>        |
| <sup>T</sup> TS3 <sub>HT-cis</sub>    | -1070.255044                 | 0.288265                       | -1071.455761       | 519.8 <i>i</i>        |
| <sup>T</sup> TS3 <sub>HT-trans</sub>  | -1070.252336                 | 0.288225                       | -1071.451575       | 531.8 <i>i</i>        |
| <sup>S</sup> Int3 <sub>HH-cis</sub>   | -1070.273872                 | 0.293507                       | -1071.500684       |                       |
| <sup>T</sup> Int3 <sub>HH-cis</sub>   | -1070.264610                 | 0.290353                       | -1071.467087       |                       |
| <sup>S</sup> TS4 <sub>HH-cis</sub>    | -1070.272697                 | 0.29469                        | -1071.497068       | 45.1 <i>i</i>         |
| <sup>S</sup> 3aa                      | -1070.337302                 | 0.296885                       | -1071.537505       |                       |
| <sup>S</sup> 3(aa)'                   | -1070.33925                  | 0.296702                       | -1071.539326       |                       |

### 6.3 Cartesian coordinates of optimized structures

<sup>s</sup>1a E(opt)= -800.1491078 hartree

---

| Center | Atomic | Atomic | Coordinates (Angstroms) |           |           |
|--------|--------|--------|-------------------------|-----------|-----------|
| Number | Number | Type   | X                       | Y         | Z         |
| 1      | 6      | 0      | 3.497300                | -2.531861 | 0.000063  |
| 2      | 6      | 0      | 3.250627                | -1.167458 | 0.000114  |
| 3      | 6      | 0      | 1.936990                | -0.664936 | 0.000122  |
| 4      | 6      | 0      | 0.852643                | -1.592901 | 0.000082  |
| 5      | 6      | 0      | 1.124938                | -2.969589 | 0.000025  |
| 6      | 6      | 0      | 2.432174                | -3.434822 | 0.000015  |
| 7      | 1      | 0      | 0.284511                | -3.668495 | -0.000010 |
| 8      | 1      | 0      | 2.624765                | -4.511185 | -0.000028 |
| 9      | 1      | 0      | 4.097770                | -0.478978 | 0.000161  |
| 10     | 6      | 0      | -0.500095               | -1.154292 | 0.000092  |
| 11     | 6      | 0      | -1.656238               | -0.769512 | 0.000091  |
| 12     | 6      | 0      | -2.998197               | -0.292650 | 0.000015  |
| 13     | 6      | 0      | -3.256352               | 1.089651  | -0.000012 |
| 14     | 6      | 0      | -4.077422               | -1.192820 | -0.000030 |
| 15     | 6      | 0      | -4.565148               | 1.555505  | -0.000082 |
| 16     | 1      | 0      | -2.416172               | 1.791051  | 0.000023  |
| 17     | 6      | 0      | -5.382838               | -0.717788 | -0.000100 |
| 18     | 1      | 0      | -3.874004               | -2.267335 | -0.000007 |
| 19     | 6      | 0      | -5.629950               | 0.654809  | -0.000126 |
| 20     | 1      | 0      | -4.756724               | 2.632003  | -0.000102 |
| 21     | 1      | 0      | -6.217424               | -1.424423 | -0.000134 |

|    |   |   |           |           |           |
|----|---|---|-----------|-----------|-----------|
| 22 | 1 | 0 | -6.658956 | 1.025167  | -0.000182 |
| 23 | 1 | 0 | 4.528132  | -2.894667 | 0.000064  |
| 24 | 6 | 0 | 1.617142  | 0.745204  | 0.000188  |
| 25 | 1 | 0 | 0.543676  | 0.966838  | 0.000383  |
| 26 | 6 | 0 | 2.411357  | 1.855027  | 0.000025  |
| 27 | 6 | 0 | 1.780891  | 3.142933  | 0.000138  |
| 28 | 6 | 0 | 3.842218  | 1.858165  | -0.000303 |
| 29 | 7 | 0 | 1.248772  | 4.174643  | 0.000239  |
| 30 | 7 | 0 | 5.003254  | 1.875933  | -0.000534 |

---

<sup>1</sup>1a E(opt)= -800.0825673 hartree

---

| Center<br>Number | Atomic<br>Number | Atomic<br>Type | Coordinates (Angstroms) |           |           |
|------------------|------------------|----------------|-------------------------|-----------|-----------|
|                  |                  |                | X                       | Y         | Z         |
| 1                | 6                | 0              | 4.734161                | -1.005588 | -0.138835 |
| 2                | 6                | 0              | 4.113850                | 0.216947  | 0.003836  |
| 3                | 6                | 0              | 2.694566                | 0.338671  | 0.023555  |
| 4                | 6                | 0              | 1.916922                | -0.863252 | -0.127318 |
| 5                | 6                | 0              | 2.577223                | -2.091875 | -0.264771 |
| 6                | 6                | 0              | 3.964772                | -2.172324 | -0.271039 |
| 7                | 1                | 0              | 1.970416                | -2.994834 | -0.374521 |
| 8                | 1                | 0              | 4.453058                | -3.144035 | -0.382843 |
| 9                | 1                | 0              | 4.710156                | 1.128467  | 0.112144  |
| 10               | 6                | 0              | 0.497346                | -0.835093 | -0.138794 |
| 11               | 6                | 0              | -0.723723               | -0.856317 | -0.152904 |
| 12               | 6                | 0              | -2.147860               | -0.820196 | -0.140112 |
| 13               | 6                | 0              | -2.844175               | 0.052563  | -0.995283 |

|    |   |   |           |           |           |
|----|---|---|-----------|-----------|-----------|
| 14 | 6 | 0 | -2.869342 | -1.644261 | 0.741323  |
| 15 | 6 | 0 | -4.232811 | 0.096223  | -0.961284 |
| 16 | 1 | 0 | -2.283832 | 0.695308  | -1.681103 |
| 17 | 6 | 0 | -4.257102 | -1.594143 | 0.764475  |
| 18 | 1 | 0 | -2.322769 | -2.316322 | 1.408721  |
| 19 | 6 | 0 | -4.941227 | -0.724681 | -0.085032 |
| 20 | 1 | 0 | -4.767508 | 0.779140  | -1.627108 |
| 21 | 1 | 0 | -4.811782 | -2.236088 | 1.454484  |
| 22 | 1 | 0 | -6.034056 | -0.686226 | -0.062395 |
| 23 | 1 | 0 | 5.825841  | -1.065218 | -0.146750 |
| 24 | 6 | 0 | 2.132033  | 1.614254  | 0.199773  |
| 25 | 6 | 0 | 0.694692  | 1.926313  | 0.273544  |
| 26 | 1 | 0 | 2.819753  | 2.466100  | 0.299180  |
| 27 | 6 | 0 | -0.002352 | 2.331129  | -0.886424 |
| 28 | 6 | 0 | 0.021012  | 1.931040  | 1.515872  |
| 29 | 7 | 0 | -0.514549 | 1.921623  | 2.552062  |
| 30 | 7 | 0 | -0.560764 | 2.646556  | -1.861104 |

-----

<sup>s</sup>2a E(opt)= -270.1541718 hartree

| Center<br>Number | Atomic<br>Number | Atomic<br>Type | Coordinates (Angstroms) |           |           |
|------------------|------------------|----------------|-------------------------|-----------|-----------|
|                  |                  |                | X                       | Y         | Z         |
| 1                | 6                | 0              | -0.838587               | -1.039830 | -0.323980 |
| 2                | 6                | 0              | 0.535344                | -1.206578 | 0.291770  |
| 3                | 6                | 0              | 0.901208                | 1.065299  | -0.083398 |
| 4                | 6                | 0              | -0.398089               | 1.356272  | 0.063121  |
| 5                | 6                | 0              | -1.443051               | 0.283944  | 0.126008  |

S40



|    |   |   |           |           |           |
|----|---|---|-----------|-----------|-----------|
| 6  | 1 | 0 | 0.454666  | -1.189800 | 1.398726  |
| 7  | 1 | 0 | 1.008829  | -2.157420 | 0.004108  |
| 8  | 1 | 0 | -0.730803 | -1.049945 | -1.423871 |
| 9  | 1 | 0 | -1.478050 | -1.896525 | -0.055760 |
| 10 | 1 | 0 | -1.854807 | 0.191953  | 1.150633  |
| 11 | 1 | 0 | -2.305231 | 0.550466  | -0.510746 |
| 12 | 1 | 0 | 1.675465  | 1.830482  | -0.199354 |
| 13 | 1 | 0 | -0.688986 | 2.409846  | 0.095730  |
| 14 | 8 | 0 | 1.422247  | -0.180462 | -0.112574 |

-----

<sup>‡</sup>TS1 E(opt)= -800.0722321 hartree

| Center<br>Number | Atomic<br>Number | Atomic<br>Type | Coordinates (Angstroms) |           |           |
|------------------|------------------|----------------|-------------------------|-----------|-----------|
|                  |                  |                | X                       | Y         | Z         |
| 1                | 6                | 0              | 3.144317                | -1.575206 | 0.147180  |
| 2                | 6                | 0              | 3.685869                | -0.330752 | 0.505544  |
| 3                | 6                | 0              | 2.888974                | 0.820805  | 0.425880  |
| 4                | 6                | 0              | 1.571908                | 0.745529  | -0.007268 |
| 5                | 6                | 0              | 0.986586                | -0.520629 | -0.398071 |
| 6                | 6                | 0              | 1.835735                | -1.670650 | -0.291268 |
| 7                | 7                | 0              | 0.773488                | 1.891934  | -0.025785 |
| 8                | 6                | 0              | -0.503955               | 1.981287  | -0.572055 |
| 9                | 6                | 0              | -1.099517               | 0.713889  | -0.939904 |
| 10               | 6                | 0              | -0.348058               | -0.557078 | -0.822648 |
| 11               | 8                | 0              | -1.066283               | 3.074157  | -0.674747 |
| 12               | 6                | 0              | -2.135554               | -2.111608 | 0.088724  |
| 13               | 6                | 0              | -3.118905               | -0.966116 | 0.388776  |

S41

|    |   |   |           |           |           |
|----|---|---|-----------|-----------|-----------|
| 14 | 6 | 0 | -2.500847 | 0.300468  | 0.950847  |
| 15 | 6 | 0 | -1.576066 | 0.313131  | 1.952972  |
| 16 | 1 | 0 | 3.755777  | -2.470579 | 0.211157  |
| 17 | 1 | 0 | 4.713172  | -0.253259 | 0.846304  |
| 18 | 1 | 0 | 3.296552  | 1.786060  | 0.716768  |
| 19 | 1 | 0 | 1.438222  | -2.640782 | -0.567767 |
| 20 | 1 | 0 | 1.182827  | 2.779562  | 0.234003  |
| 21 | 1 | 0 | -1.953094 | 0.776261  | -1.606573 |
| 22 | 1 | 0 | -2.711244 | -3.008515 | -0.169847 |
| 23 | 1 | 0 | -1.559277 | -2.360873 | 0.987105  |
| 24 | 1 | 0 | -3.672550 | -0.720930 | -0.525716 |
| 25 | 1 | 0 | -3.871888 | -1.322714 | 1.106397  |
| 26 | 1 | 0 | -3.004067 | 1.234253  | 0.710946  |
| 27 | 1 | 0 | -1.232537 | 1.249317  | 2.379665  |
| 28 | 1 | 0 | -1.093761 | -0.592051 | 2.306490  |
| 29 | 6 | 0 | -1.151037 | -1.800902 | -1.067512 |
| 30 | 1 | 0 | -0.511235 | -2.672779 | -1.227846 |
| 31 | 1 | 0 | -1.737745 | -1.672771 | -1.989796 |

-----

<sup>T</sup>Int1 E(opt)= -800.0975839 hartree

| Center<br>Number | Atomic<br>Number | Atomic<br>Type | Coordinates (Angstroms) |           |           |
|------------------|------------------|----------------|-------------------------|-----------|-----------|
|                  |                  |                | X                       | Y         | Z         |
| 1                | 6                | 0              | 4.591280                | -1.232494 | 0.000379  |
| 2                | 6                | 0              | 4.193523                | 0.090751  | 0.001226  |
| 3                | 6                | 0              | 2.807786                | 0.388674  | 0.000761  |
| 4                | 6                | 0              | 1.861571                | -0.683496 | -0.000561 |

S42

|    |   |   |           |           |           |
|----|---|---|-----------|-----------|-----------|
| 5  | 6 | 0 | 2.281058  | -2.009495 | -0.001412 |
| 6  | 6 | 0 | 3.647336  | -2.280762 | -0.000940 |
| 7  | 1 | 0 | 1.540695  | -2.815822 | -0.002401 |
| 8  | 1 | 0 | 3.995459  | -3.317363 | -0.001594 |
| 9  | 6 | 0 | 2.153093  | 1.623363  | 0.001459  |
| 10 | 1 | 0 | 4.928357  | 0.900619  | 0.002251  |
| 11 | 6 | 0 | 0.509409  | -0.147509 | -0.000607 |
| 12 | 6 | 0 | -0.662832 | -0.749480 | -0.001086 |
| 13 | 6 | 0 | -2.056906 | -0.752656 | -0.000782 |
| 14 | 6 | 0 | -2.780544 | -0.761461 | 1.222486  |
| 15 | 6 | 0 | -2.781627 | -0.759473 | -1.223389 |
| 16 | 6 | 0 | -4.164771 | -0.768124 | 1.211607  |
| 17 | 1 | 0 | -2.224845 | -0.744519 | 2.164704  |
| 18 | 6 | 0 | -4.165873 | -0.766147 | -1.211229 |
| 19 | 1 | 0 | -2.226823 | -0.740967 | -2.166104 |
| 20 | 6 | 0 | -4.864248 | -0.773298 | 0.000490  |
| 21 | 1 | 0 | -4.712228 | -0.762706 | 2.158267  |
| 22 | 1 | 0 | -4.714160 | -0.759172 | -2.157397 |
| 23 | 1 | 0 | -5.957804 | -0.777161 | 0.000991  |
| 24 | 6 | 0 | 0.651339  | 1.414009  | 0.000449  |
| 25 | 6 | 0 | 0.021894  | 1.967958  | -1.207207 |
| 26 | 7 | 0 | -0.460041 | 2.377888  | -2.177681 |
| 27 | 6 | 0 | 0.020203  | 1.966662  | 1.207760  |
| 28 | 7 | 0 | -0.463195 | 2.375603  | 2.177921  |
| 29 | 1 | 0 | 2.606225  | 2.616289  | 0.002462  |
| 30 | 1 | 0 | 5.657625  | -1.475767 | 0.000726  |

---

<sup>T</sup>TS2<sub>HH-cis</sub> E(opt)= -1070.251336 hartree

| Center<br>Number | Atomic<br>Number | Atomic<br>Type | Coordinates (Angstroms) |           |           |
|------------------|------------------|----------------|-------------------------|-----------|-----------|
|                  |                  |                | X                       | Y         | Z         |
| 1                | 6                | 0              | -3.315942               | -1.729492 | -1.914916 |
| 2                | 6                | 0              | -3.215288               | -1.492967 | -0.547912 |
| 3                | 6                | 0              | -1.961735               | -1.175245 | -0.001256 |
| 4                | 6                | 0              | -0.827834               | -1.132139 | -0.847433 |
| 5                | 6                | 0              | -0.936628               | -1.359985 | -2.215297 |
| 6                | 6                | 0              | -2.189868               | -1.655430 | -2.748176 |
| 7                | 1                | 0              | -0.044183               | -1.317284 | -2.848012 |
| 8                | 1                | 0              | -2.295226               | -1.849335 | -3.819122 |
| 9                | 6                | 0              | -1.604414               | -0.772930 | 1.333089  |
| 10               | 6                | 0              | -0.939810               | 1.980256  | 0.607330  |
| 11               | 6                | 0              | -2.480751               | 2.141648  | -1.161016 |
| 12               | 1                | 0              | -2.580259               | 1.093095  | -1.502422 |
| 13               | 1                | 0              | -4.097055               | -1.572729 | 0.096292  |
| 14               | 6                | 0              | 0.365768                | -0.818441 | -0.059199 |
| 15               | 6                | 0              | 1.575468                | -0.488732 | -0.442170 |
| 16               | 6                | 0              | 2.877147                | -0.037180 | -0.543296 |
| 17               | 6                | 0              | 3.145473                | 1.361660  | -0.610769 |
| 18               | 6                | 0              | 3.976634                | -0.941253 | -0.598995 |
| 19               | 6                | 0              | 4.446552                | 1.818349  | -0.716414 |
| 20               | 1                | 0              | 2.302546                | 2.059261  | -0.580525 |
| 21               | 6                | 0              | 5.269381                | -0.460719 | -0.705214 |
| 22               | 1                | 0              | 3.777627                | -2.015372 | -0.546880 |
| 23               | 6                | 0              | 5.515665                | 0.915886  | -0.764208 |
| 24               | 1                | 0              | 4.638590                | 2.894158  | -0.761734 |
| 25               | 1                | 0              | 6.105332                | -1.165267 | -0.739803 |

|    |   |   |           |           |           |
|----|---|---|-----------|-----------|-----------|
| 26 | 1 | 0 | 6.541370  | 1.285848  | -0.846796 |
| 27 | 6 | 0 | -1.874999 | 1.376520  | 1.433390  |
| 28 | 6 | 0 | -3.516988 | 2.459320  | -0.106436 |
| 29 | 1 | 0 | -3.397368 | 3.516112  | 0.194086  |
| 30 | 1 | 0 | -4.525460 | 2.361510  | -0.539347 |
| 31 | 8 | 0 | -1.162796 | 2.340022  | -0.661627 |
| 32 | 6 | 0 | -3.341050 | 1.545873  | 1.101985  |
| 33 | 1 | 0 | -3.866139 | 1.965291  | 1.976240  |
| 34 | 1 | 0 | -3.825037 | 0.573082  | 0.903085  |
| 35 | 1 | 0 | -1.590513 | 1.368694  | 2.491609  |
| 36 | 1 | 0 | 0.090409  | 2.173698  | 0.921119  |
| 37 | 1 | 0 | -2.570388 | 2.791805  | -2.043525 |
| 38 | 6 | 0 | -0.088030 | -0.958416 | 1.432353  |
| 39 | 6 | 0 | 0.191794  | -2.338577 | 1.864739  |
| 40 | 7 | 0 | 0.388282  | -3.433979 | 2.188707  |
| 41 | 6 | 0 | 0.617503  | -0.031138 | 2.322038  |
| 42 | 7 | 0 | 1.185075  | 0.705667  | 3.012508  |
| 43 | 1 | 0 | -2.216524 | -1.036886 | 2.203384  |
| 44 | 1 | 0 | -4.287145 | -1.988874 | -2.346454 |

-----

<sup>t</sup>TS2'<sub>HH-cis</sub> E(opt)= -1070.239978 hartree

| Center<br>Number | Atomic<br>Number | Atomic<br>Type | Coordinates (Angstroms) |          |           |
|------------------|------------------|----------------|-------------------------|----------|-----------|
|                  |                  |                | X                       | Y        | Z         |
| 1                | 6                | 0              | -2.452553               | 3.367550 | -0.487463 |
| 2                | 6                | 0              | -2.341202               | 2.010158 | -0.755095 |
| 3                | 6                | 0              | -1.098436               | 1.348054 | -0.699457 |

S45

|    |   |   |           |           |           |
|----|---|---|-----------|-----------|-----------|
| 4  | 6 | 0 | 0.051462  | 2.129208  | -0.361052 |
| 5  | 6 | 0 | -0.083736 | 3.499828  | -0.095811 |
| 6  | 6 | 0 | -1.324542 | 4.120953  | -0.153321 |
| 7  | 1 | 0 | 0.813623  | 4.070364  | 0.160260  |
| 8  | 1 | 0 | -1.413734 | 5.189995  | 0.056727  |
| 9  | 6 | 0 | -0.923827 | -0.070560 | -0.921575 |
| 10 | 6 | 0 | -1.350457 | -2.265293 | 0.903576  |
| 11 | 6 | 0 | -3.055983 | -1.575285 | 2.410239  |
| 12 | 1 | 0 | -2.690818 | -1.936675 | 3.391539  |
| 13 | 1 | 0 | -3.241837 | 1.453306  | -1.025591 |
| 14 | 6 | 0 | 1.329158  | 1.513691  | -0.258644 |
| 15 | 6 | 0 | 2.404292  | 0.946518  | -0.160562 |
| 16 | 6 | 0 | 3.640138  | 0.248398  | -0.043935 |
| 17 | 6 | 0 | 3.736049  | -1.090595 | -0.464798 |
| 18 | 6 | 0 | 4.775510  | 0.875696  | 0.497559  |
| 19 | 6 | 0 | 4.935794  | -1.780693 | -0.341956 |
| 20 | 1 | 0 | 2.856116  | -1.578005 | -0.897515 |
| 21 | 6 | 0 | 5.971567  | 0.178603  | 0.615445  |
| 22 | 1 | 0 | 4.701715  | 1.917051  | 0.823482  |
| 23 | 6 | 0 | 6.055948  | -1.149622 | 0.198151  |
| 24 | 1 | 0 | 4.998917  | -2.820663 | -0.674358 |
| 25 | 1 | 0 | 6.849325  | 0.676170  | 1.037592  |
| 26 | 1 | 0 | 6.999452  | -1.694606 | 0.292174  |
| 27 | 6 | 0 | -0.652389 | -1.047151 | 0.991386  |
| 28 | 6 | 0 | -2.629217 | -0.143896 | 2.183290  |
| 29 | 1 | 0 | -3.135216 | 0.260433  | 1.289513  |
| 30 | 1 | 0 | -2.969335 | 0.468306  | 3.033707  |
| 31 | 8 | 0 | -2.560452 | -2.473413 | 1.416456  |
| 32 | 6 | 0 | -1.120919 | -0.060118 | 2.016451  |

|    |   |   |           |           |           |
|----|---|---|-----------|-----------|-----------|
| 33 | 1 | 0 | -0.798307 | 0.964340  | 1.768849  |
| 34 | 1 | 0 | -0.616493 | -0.303849 | 2.973482  |
| 35 | 1 | 0 | 0.426733  | -1.106841 | 0.809837  |
| 36 | 1 | 0 | -0.987381 | -3.115613 | 0.317341  |
| 37 | 1 | 0 | -4.149297 | -1.689617 | 2.390644  |
| 38 | 6 | 0 | -1.933313 | -0.973945 | -1.475405 |
| 39 | 6 | 0 | -3.308634 | -0.931825 | -1.162867 |
| 40 | 7 | 0 | -4.437982 | -0.901163 | -0.868453 |
| 41 | 6 | 0 | -1.490388 | -2.061181 | -2.262911 |
| 42 | 7 | 0 | -1.078017 | -2.956269 | -2.887528 |
| 43 | 1 | 0 | 0.080280  | -0.341877 | -1.267393 |
| 44 | 1 | 0 | -3.434075 | 3.846158  | -0.547552 |

---

<sup>T</sup>TS2<sub>HH-trans</sub> E(opt)= -1070.248466 hartree

---

| Center<br>Number | Atomic<br>Number | Atomic<br>Type | Coordinates (Angstroms) |           |           |
|------------------|------------------|----------------|-------------------------|-----------|-----------|
|                  |                  |                | X                       | Y         | Z         |
| 1                | 6                | 0              | 3.060824                | 2.725311  | -0.540880 |
| 2                | 6                | 0              | 2.898782                | 1.756384  | 0.442240  |
| 3                | 6                | 0              | 1.657266                | 1.112928  | 0.562301  |
| 4                | 6                | 0              | 0.594860                | 1.477858  | -0.295475 |
| 5                | 6                | 0              | 0.765680                | 2.445966  | -1.280773 |
| 6                | 6                | 0              | 2.007519                | 3.066378  | -1.402837 |
| 7                | 1                | 0              | -0.071394               | 2.713646  | -1.933800 |
| 8                | 1                | 0              | 2.160044                | 3.834145  | -2.166404 |
| 9                | 6                | 0              | 1.279326                | 0.025375  | 1.428118  |
| 10               | 6                | 0              | 3.532827                | -1.633965 | 0.874855  |

|    |   |   |           |           |           |
|----|---|---|-----------|-----------|-----------|
| 11 | 6 | 0 | 4.114723  | -1.556292 | -1.397897 |
| 12 | 1 | 0 | 4.264625  | -2.642172 | -1.564195 |
| 13 | 1 | 0 | 3.727235  | 1.485088  | 1.103648  |
| 14 | 6 | 0 | -0.604530 | 0.710671  | 0.038684  |
| 15 | 6 | 0 | -1.788070 | 0.653519  | -0.528144 |
| 16 | 6 | 0 | -3.111100 | 0.231674  | -0.631086 |
| 17 | 6 | 0 | -3.459255 | -0.902440 | -1.413935 |
| 18 | 6 | 0 | -4.145418 | 0.936893  | 0.043071  |
| 19 | 6 | 0 | -4.779335 | -1.307270 | -1.506720 |
| 20 | 1 | 0 | -2.663039 | -1.455952 | -1.921071 |
| 21 | 6 | 0 | -5.460064 | 0.515904  | -0.063697 |
| 22 | 1 | 0 | -3.878529 | 1.803021  | 0.656266  |
| 23 | 6 | 0 | -5.786023 | -0.602262 | -0.838111 |
| 24 | 1 | 0 | -5.034023 | -2.188663 | -2.101992 |
| 25 | 1 | 0 | -6.246184 | 1.059732  | 0.467765  |
| 26 | 1 | 0 | -6.826693 | -0.929122 | -0.916059 |
| 27 | 6 | 0 | 2.183171  | -1.787123 | 0.624556  |
| 28 | 6 | 0 | 2.695196  | -1.164431 | -1.738238 |
| 29 | 1 | 0 | 2.593890  | -0.069454 | -1.648997 |
| 30 | 1 | 0 | 2.487939  | -1.415450 | -2.791152 |
| 31 | 8 | 0 | 4.441963  | -1.268945 | -0.043898 |
| 32 | 6 | 0 | 1.716612  | -1.867070 | -0.806739 |
| 33 | 1 | 0 | 0.701135  | -1.452367 | -0.928385 |
| 34 | 1 | 0 | 1.623733  | -2.934495 | -1.085118 |
| 35 | 1 | 0 | 1.622516  | -2.361608 | 1.370502  |
| 36 | 1 | 0 | 3.954005  | -1.674422 | 1.885475  |
| 37 | 1 | 0 | 4.852682  | -1.016702 | -2.009327 |
| 38 | 6 | 0 | -0.249757 | -0.086339 | 1.342476  |
| 39 | 6 | 0 | -0.859495 | 0.625123  | 2.476361  |



|    |   |   |           |           |           |
|----|---|---|-----------|-----------|-----------|
| 40 | 7 | 0 | -1.322554 | 1.216361  | 3.359505  |
| 41 | 6 | 0 | -0.772880 | -1.457100 | 1.292495  |
| 42 | 7 | 0 | -1.177093 | -2.540414 | 1.222145  |
| 43 | 1 | 0 | 1.724311  | -0.086298 | 2.422525  |
| 44 | 1 | 0 | 4.024412  | 3.232837  | -0.643785 |

---

<sup>†</sup>TS2<sub>HT-cis</sub> E(opt)= -1070.243688 hartree

---

| Center<br>Number | Atomic<br>Number | Atomic<br>Type | Coordinates (Angstroms) |           |           |
|------------------|------------------|----------------|-------------------------|-----------|-----------|
|                  |                  |                | X                       | Y         | Z         |
| 1                | 6                | 0              | -3.725227               | -2.387769 | -0.935839 |
| 2                | 6                | 0              | -3.485991               | -1.606986 | 0.187336  |
| 3                | 6                | 0              | -2.191641               | -1.119513 | 0.411654  |
| 4                | 6                | 0              | -1.157050               | -1.441448 | -0.493888 |
| 5                | 6                | 0              | -1.403585               | -2.217458 | -1.622922 |
| 6                | 6                | 0              | -2.696057               | -2.686541 | -1.841638 |
| 7                | 1                | 0              | -4.731443               | -2.774998 | -1.120544 |
| 8                | 1                | 0              | -0.586611               | -2.455161 | -2.312078 |
| 9                | 1                | 0              | -2.910640               | -3.302396 | -2.719478 |
| 10               | 6                | 0              | -1.730489               | -0.174462 | 1.399703  |
| 11               | 6                | 0              | -1.794129               | 2.696707  | 1.001408  |
| 12               | 6                | 0              | -0.663184               | 2.632533  | -1.186786 |
| 13               | 1                | 0              | -0.176482               | 3.238065  | -1.968454 |
| 14               | 1                | 0              | -4.296172               | -1.364878 | 0.882866  |
| 15               | 6                | 0              | 0.103219                | -0.855839 | -0.041292 |
| 16               | 6                | 0              | 1.295135                | -0.817343 | -0.593493 |
| 17               | 6                | 0              | 2.662106                | -0.551435 | -0.618336 |

|    |   |   |           |           |           |
|----|---|---|-----------|-----------|-----------|
| 18 | 6 | 0 | 3.181215  | 0.608987  | -1.253553 |
| 19 | 6 | 0 | 3.573673  | -1.455105 | -0.006028 |
| 20 | 6 | 0 | 4.543922  | 0.850732  | -1.260997 |
| 21 | 1 | 0 | 2.486038  | 1.309998  | -1.724957 |
| 22 | 6 | 0 | 4.933509  | -1.195444 | -0.025402 |
| 23 | 1 | 0 | 3.177644  | -2.346284 | 0.490490  |
| 24 | 6 | 0 | 5.427290  | -0.046496 | -0.651344 |
| 25 | 1 | 0 | 4.930123  | 1.752776  | -1.744005 |
| 26 | 1 | 0 | 5.623132  | -1.892655 | 0.458841  |
| 27 | 1 | 0 | 6.502526  | 0.152560  | -0.661034 |
| 28 | 6 | 0 | -2.540320 | 1.605074  | 0.567288  |
| 29 | 6 | 0 | -1.991837 | 2.120897  | -1.694699 |
| 30 | 1 | 0 | -1.875853 | 1.501238  | -2.598221 |
| 31 | 1 | 0 | -2.649395 | 2.975694  | -1.955919 |
| 32 | 1 | 0 | -3.447394 | 1.331851  | 1.123996  |
| 33 | 1 | 0 | -1.871892 | 2.981470  | 2.055894  |
| 34 | 1 | 0 | 0.002049  | 1.771037  | -0.990152 |
| 35 | 6 | 0 | -0.200437 | -0.276925 | 1.383407  |
| 36 | 6 | 0 | 0.213977  | -1.299725 | 2.359859  |
| 37 | 7 | 0 | 0.524095  | -2.125124 | 3.112573  |
| 38 | 6 | 0 | 0.561563  | 0.944926  | 1.660597  |
| 39 | 7 | 0 | 1.227934  | 1.867685  | 1.876638  |
| 40 | 1 | 0 | -2.200041 | -0.111348 | 2.388788  |
| 41 | 6 | 0 | -0.869918 | 3.429201  | 0.091800  |
| 42 | 8 | 0 | -2.663836 | 1.305174  | -0.750296 |
| 43 | 1 | 0 | 0.091408  | 3.627585  | 0.597320  |
| 44 | 1 | 0 | -1.294993 | 4.426739  | -0.146472 |

---

<sup>‡</sup>TS2<sub>HT-trans</sub> E(opt)= -1070.245195 hartree

---

| Center<br>Number | Atomic<br>Number | Atomic<br>Type | Coordinates (Angstroms) |           |           |
|------------------|------------------|----------------|-------------------------|-----------|-----------|
|                  |                  |                | X                       | Y         | Z         |
| 1                | 6                | 0              | -3.076856               | -3.307363 | -1.089405 |
| 2                | 6                | 0              | -3.188946               | -2.216323 | -0.233964 |
| 3                | 6                | 0              | -2.028346               | -1.526264 | 0.142860  |
| 4                | 6                | 0              | -0.775672               | -1.946707 | -0.356344 |
| 5                | 6                | 0              | -0.669718               | -3.033600 | -1.218651 |
| 6                | 6                | 0              | -1.829343               | -3.714560 | -1.582214 |
| 7                | 1                | 0              | -3.975423               | -3.859345 | -1.379985 |
| 8                | 1                | 0              | 0.312723                | -3.342664 | -1.590164 |
| 9                | 1                | 0              | -1.767230               | -4.577416 | -2.251019 |
| 10               | 6                | 0              | -1.893123               | -0.311463 | 0.912370  |
| 11               | 6                | 0              | -1.494011               | 1.454012  | -1.314712 |
| 12               | 6                | 0              | -1.776203               | 3.858607  | -0.841352 |
| 13               | 1                | 0              | -1.247169               | 4.811642  | -0.682131 |
| 14               | 1                | 0              | -4.166249               | -1.904340 | 0.149000  |
| 15               | 6                | 0              | 0.279245                | -1.071072 | 0.157314  |
| 16               | 6                | 0              | 1.538986                | -0.948671 | -0.186616 |
| 17               | 6                | 0              | 2.838360                | -0.481544 | -0.292397 |
| 18               | 6                | 0              | 3.138519                | 0.621952  | -1.141891 |
| 19               | 6                | 0              | 3.904856                | -1.093757 | 0.424771  |
| 20               | 6                | 0              | 4.437095                | 1.084359  | -1.254362 |
| 21               | 1                | 0              | 2.320110                | 1.098218  | -1.690865 |
| 22               | 6                | 0              | 5.196739                | -0.614999 | 0.296323  |
| 23               | 1                | 0              | 3.680336                | -1.939007 | 1.081514  |
| 24               | 6                | 0              | 5.473566                | 0.471603  | -0.540779 |

S51

|    |   |   |           |           |           |
|----|---|---|-----------|-----------|-----------|
| 25 | 1 | 0 | 4.652170  | 1.938254  | -1.903116 |
| 26 | 1 | 0 | 6.006178  | -1.089758 | 0.858191  |
| 27 | 1 | 0 | 6.497577  | 0.843483  | -0.634904 |
| 28 | 6 | 0 | -2.560808 | 1.211977  | -0.455592 |
| 29 | 6 | 0 | -2.373467 | 3.389379  | 0.467024  |
| 30 | 1 | 0 | -3.088698 | 4.118390  | 0.875886  |
| 31 | 1 | 0 | -1.578709 | 3.238746  | 1.220320  |
| 32 | 1 | 0 | -3.310111 | 0.458024  | -0.725280 |
| 33 | 1 | 0 | -1.168722 | 0.626275  | -1.954729 |
| 34 | 1 | 0 | -2.596344 | 4.057461  | -1.555131 |
| 35 | 6 | 0 | -0.407297 | -0.222585 | 1.277145  |
| 36 | 6 | 0 | -0.203988 | -0.917937 | 2.560547  |
| 37 | 7 | 0 | -0.066060 | -1.487202 | 3.560808  |
| 38 | 6 | 0 | 0.173573  | 1.117186  | 1.375646  |
| 39 | 7 | 0 | 0.673908  | 2.158400  | 1.463766  |
| 40 | 1 | 0 | -2.623721 | -0.017822 | 1.675195  |
| 41 | 6 | 0 | -0.843935 | 2.792517  | -1.405850 |
| 42 | 8 | 0 | -3.111034 | 2.181943  | 0.306525  |
| 43 | 1 | 0 | -0.588840 | 3.008604  | -2.458433 |
| 44 | 1 | 0 | 0.120093  | 2.808848  | -0.857770 |

-----

<sup>T</sup>Int2<sub>HF-cis</sub> E(opt)= -1070.275993 hartree

| Center<br>Number | Atomic<br>Number | Atomic<br>Type | Coordinates (Angstroms) |          |           |
|------------------|------------------|----------------|-------------------------|----------|-----------|
|                  |                  |                | X                       | Y        | Z         |
| 1                | 6                | 0              | -3.197664               | 2.468626 | 1.119831  |
| 2                | 6                | 0              | -3.097776               | 1.658932 | -0.012198 |

S52

|    |   |   |           |           |           |
|----|---|---|-----------|-----------|-----------|
| 3  | 6 | 0 | -1.879585 | 1.051983  | -0.304278 |
| 4  | 6 | 0 | -0.761367 | 1.304574  | 0.502386  |
| 5  | 6 | 0 | -0.862040 | 2.095571  | 1.644457  |
| 6  | 6 | 0 | -2.092890 | 2.668063  | 1.953015  |
| 7  | 1 | 0 | 0.022055  | 2.273839  | 2.264723  |
| 8  | 1 | 0 | -2.190718 | 3.301560  | 2.839096  |
| 9  | 6 | 0 | -1.549663 | 0.041016  | -1.368387 |
| 10 | 6 | 0 | -1.147051 | -1.880652 | 0.263514  |
| 11 | 6 | 0 | -3.042175 | -1.585689 | 1.647629  |
| 12 | 1 | 0 | -3.240192 | -0.493991 | 1.663914  |
| 13 | 1 | 0 | -3.966469 | 1.514681  | -0.662888 |
| 14 | 6 | 0 | 0.434818  | 0.681210  | -0.074262 |
| 15 | 6 | 0 | 1.650982  | 0.558559  | 0.398031  |
| 16 | 6 | 0 | 2.974972  | 0.178754  | 0.544168  |
| 17 | 6 | 0 | 3.299539  | -1.118966 | 1.033834  |
| 18 | 6 | 0 | 4.039321  | 1.069040  | 0.226735  |
| 19 | 6 | 0 | 4.621141  | -1.497498 | 1.185749  |
| 20 | 1 | 0 | 2.483625  | -1.807243 | 1.274782  |
| 21 | 6 | 0 | 5.354313  | 0.669350  | 0.387296  |
| 22 | 1 | 0 | 3.796112  | 2.065625  | -0.152705 |
| 23 | 6 | 0 | 5.655588  | -0.610330 | 0.866749  |
| 24 | 1 | 0 | 4.856673  | -2.500142 | 1.553803  |
| 25 | 1 | 0 | 6.163249  | 1.360182  | 0.132828  |
| 26 | 1 | 0 | 6.697846  | -0.917873 | 0.989050  |
| 27 | 6 | 0 | -1.893491 | -1.429276 | -0.945000 |
| 28 | 6 | 0 | -3.805739 | -2.247927 | 0.523366  |
| 29 | 1 | 0 | -3.568633 | -3.327667 | 0.532293  |
| 30 | 1 | 0 | -4.890137 | -2.158915 | 0.699336  |
| 31 | 8 | 0 | -1.651466 | -1.817895 | 1.513568  |

|    |   |   |           |           |           |
|----|---|---|-----------|-----------|-----------|
| 32 | 6 | 0 | -3.421229 | -1.626870 | -0.812637 |
| 33 | 1 | 0 | -3.793316 | -2.245272 | -1.645121 |
| 34 | 1 | 0 | -3.936033 | -0.656203 | -0.909611 |
| 35 | 1 | 0 | -1.524226 | -2.054696 | -1.778801 |
| 36 | 1 | 0 | -0.173100 | -2.373589 | 0.211315  |
| 37 | 1 | 0 | -3.326640 | -1.985681 | 2.633110  |
| 38 | 6 | 0 | -0.003298 | 0.238987  | -1.508679 |
| 39 | 6 | 0 | 0.255407  | 1.360418  | -2.423146 |
| 40 | 7 | 0 | 0.445987  | 2.258246  | -3.130110 |
| 41 | 6 | 0 | 0.733893  | -0.938433 | -1.968794 |
| 42 | 7 | 0 | 1.326312  | -1.874888 | -2.306184 |
| 43 | 1 | 0 | -2.052588 | 0.251571  | -2.329826 |
| 44 | 1 | 0 | -4.147901 | 2.956806  | 1.353941  |

-----

<sup>T</sup>Int2<sub>HH-trans</sub> E(opt)= -1070.279219 hartree

| Center<br>Number | Atomic<br>Number | Atomic<br>Type | Coordinates (Angstroms) |           |           |
|------------------|------------------|----------------|-------------------------|-----------|-----------|
|                  |                  |                | X                       | Y         | Z         |
| 1                | 6                | 0              | 3.046880                | 2.759458  | -0.431314 |
| 2                | 6                | 0              | 2.938980                | 1.654488  | 0.411253  |
| 3                | 6                | 0              | 1.719164                | 0.988581  | 0.492396  |
| 4                | 6                | 0              | 0.615648                | 1.449434  | -0.234139 |
| 5                | 6                | 0              | 0.722866                | 2.549692  | -1.084064 |
| 6                | 6                | 0              | 1.950205                | 3.197681  | -1.181776 |
| 7                | 1                | 0              | -0.151366               | 2.892839  | -1.646569 |
| 8                | 1                | 0              | 2.055720                | 4.066501  | -1.837581 |
| 9                | 6                | 0              | 1.405511                | -0.277312 | 1.242602  |

S54

|    |   |   |           |           |           |
|----|---|---|-----------|-----------|-----------|
| 10 | 6 | 0 | 3.506495  | -1.570821 | 0.816321  |
| 11 | 6 | 0 | 4.036159  | -1.534083 | -1.476902 |
| 12 | 1 | 0 | 4.180830  | -2.629434 | -1.584845 |
| 13 | 1 | 0 | 3.803350  | 1.304459  | 0.983078  |
| 14 | 6 | 0 | -0.570715 | 0.639751  | 0.055956  |
| 15 | 6 | 0 | -1.773313 | 0.650666  | -0.465933 |
| 16 | 6 | 0 | -3.109721 | 0.283588  | -0.576950 |
| 17 | 6 | 0 | -3.522154 | -0.733833 | -1.480253 |
| 18 | 6 | 0 | -4.097225 | 0.933212  | 0.214678  |
| 19 | 6 | 0 | -4.858282 | -1.080454 | -1.575968 |
| 20 | 1 | 0 | -2.763112 | -1.244202 | -2.080729 |
| 21 | 6 | 0 | -5.428565 | 0.571434  | 0.102671  |
| 22 | 1 | 0 | -3.780322 | 1.708344  | 0.919159  |
| 23 | 6 | 0 | -5.818133 | -0.431292 | -0.791442 |
| 24 | 1 | 0 | -5.163200 | -1.872103 | -2.266149 |
| 25 | 1 | 0 | -6.177991 | 1.070563  | 0.723442  |
| 26 | 1 | 0 | -6.871874 | -0.711945 | -0.873338 |
| 27 | 6 | 0 | 2.025679  | -1.561212 | 0.619134  |
| 28 | 6 | 0 | 2.614577  | -1.165003 | -1.830459 |
| 29 | 1 | 0 | 2.507780  | -0.066484 | -1.826519 |
| 30 | 1 | 0 | 2.396322  | -1.498027 | -2.858825 |
| 31 | 8 | 0 | 4.362225  | -1.163023 | -0.148761 |
| 32 | 6 | 0 | 1.653493  | -1.820207 | -0.848417 |
| 33 | 1 | 0 | 0.613194  | -1.517520 | -1.057105 |
| 34 | 1 | 0 | 1.679790  | -2.913612 | -1.009081 |
| 35 | 1 | 0 | 1.614391  | -2.392053 | 1.226019  |
| 36 | 1 | 0 | 3.931036  | -1.469570 | 1.821906  |
| 37 | 1 | 0 | 4.770043  | -1.030991 | -2.124099 |
| 38 | 6 | 0 | -0.168531 | -0.271313 | 1.262405  |

|    |   |   |           |           |           |
|----|---|---|-----------|-----------|-----------|
| 39 | 6 | 0 | -0.640866 | 0.402570  | 2.478409  |
| 40 | 7 | 0 | -1.006482 | 0.964379  | 3.423696  |
| 41 | 6 | 0 | -0.789171 | -1.594678 | 1.177703  |
| 42 | 7 | 0 | -1.288498 | -2.635302 | 1.080036  |
| 43 | 1 | 0 | 1.768895  | -0.229349 | 2.285210  |
| 44 | 1 | 0 | 3.999673  | 3.291150  | -0.505468 |

---

<sup>†</sup>Int2<sub>HF-cis</sub> E(opt)= -1070.280389 hartree

---

| Center<br>Number | Atomic<br>Number | Atomic<br>Type | Coordinates (Angstroms) |           |           |
|------------------|------------------|----------------|-------------------------|-----------|-----------|
|                  |                  |                | X                       | Y         | Z         |
| 1                | 6                | 0              | -2.855271               | -3.549542 | -0.676484 |
| 2                | 6                | 0              | -2.982936               | -2.389597 | 0.086532  |
| 3                | 6                | 0              | -1.869007               | -1.577040 | 0.267078  |
| 4                | 6                | 0              | -0.643809               | -1.921760 | -0.307374 |
| 5                | 6                | 0              | -0.512703               | -3.078121 | -1.074926 |
| 6                | 6                | 0              | -1.628506               | -3.888911 | -1.255941 |
| 7                | 1                | 0              | -3.721356               | -4.201496 | -0.821277 |
| 8                | 1                | 0              | 0.456264                | -3.333208 | -1.516028 |
| 9                | 1                | 0              | -1.545551               | -4.803207 | -1.850356 |
| 10               | 6                | 0              | -1.806511               | -0.256204 | 0.984862  |
| 11               | 6                | 0              | -2.601275               | 2.127461  | 0.987546  |
| 12               | 6                | 0              | -2.151973               | 3.353597  | -1.134967 |
| 13               | 1                | 0              | -2.509999               | 4.190014  | -1.757551 |
| 14               | 1                | 0              | -3.945263               | -2.124348 | 0.537615  |
| 15               | 6                | 0              | 0.384647                | -0.937395 | 0.032781  |
| 16               | 6                | 0              | 1.631021                | -0.830808 | -0.355161 |



|    |   |   |           |           |           |
|----|---|---|-----------|-----------|-----------|
| 17 | 6 | 0 | 2.925303  | -0.331704 | -0.404650 |
| 18 | 6 | 0 | 3.304411  | 0.635329  | -1.376712 |
| 19 | 6 | 0 | 3.907889  | -0.791411 | 0.516694  |
| 20 | 6 | 0 | 4.601961  | 1.113702  | -1.414267 |
| 21 | 1 | 0 | 2.547550  | 1.000549  | -2.076870 |
| 22 | 6 | 0 | 5.200328  | -0.299634 | 0.460572  |
| 23 | 1 | 0 | 3.615605  | -1.525603 | 1.273707  |
| 24 | 6 | 0 | 5.557330  | 0.650085  | -0.502710 |
| 25 | 1 | 0 | 4.879420  | 1.864511  | -2.159651 |
| 26 | 1 | 0 | 5.944466  | -0.653831 | 1.179668  |
| 27 | 1 | 0 | 6.580620  | 1.034071  | -0.539796 |
| 28 | 6 | 0 | -2.567893 | 0.839160  | 0.240461  |
| 29 | 6 | 0 | -2.486185 | 2.030736  | -1.789958 |
| 30 | 1 | 0 | -2.036764 | 1.943777  | -2.791193 |
| 31 | 1 | 0 | -3.588152 | 1.922703  | -1.910680 |
| 32 | 1 | 0 | -3.617932 | 0.453690  | 0.120661  |
| 33 | 1 | 0 | -2.788428 | 2.080121  | 2.067436  |
| 34 | 1 | 0 | -1.054218 | 3.441555  | -1.063017 |
| 35 | 6 | 0 | -0.262332 | 0.016724  | 1.092402  |
| 36 | 6 | 0 | 0.217215  | -0.418164 | 2.411273  |
| 37 | 7 | 0 | 0.590945  | -0.794030 | 3.441743  |
| 38 | 6 | 0 | 0.173933  | 1.401307  | 0.876188  |
| 39 | 7 | 0 | 0.617746  | 2.457281  | 0.699702  |
| 40 | 1 | 0 | -2.239505 | -0.320064 | 1.999549  |
| 41 | 6 | 0 | -2.762811 | 3.414191  | 0.262059  |
| 42 | 8 | 0 | -1.987524 | 0.952115  | -1.032587 |
| 43 | 1 | 0 | -2.327577 | 4.241403  | 0.850158  |
| 44 | 1 | 0 | -3.846786 | 3.657681  | 0.176404  |

<sup>1</sup>Int2<sub>HF-trans</sub> E(opt)= -1070.277859 hartree

---

| Center<br>Number | Atomic<br>Number | Atomic<br>Type | Coordinates (Angstroms) |           |           |
|------------------|------------------|----------------|-------------------------|-----------|-----------|
|                  |                  |                | X                       | Y         | Z         |
| 1                | 6                | 0              | -2.824880               | -3.504423 | -0.992924 |
| 2                | 6                | 0              | -3.023751               | -2.346826 | -0.240933 |
| 3                | 6                | 0              | -1.920615               | -1.575174 | 0.109415  |
| 4                | 6                | 0              | -0.635908               | -1.958587 | -0.289231 |
| 5                | 6                | 0              | -0.434000               | -3.111162 | -1.046872 |
| 6                | 6                | 0              | -1.539645               | -3.881444 | -1.394926 |
| 7                | 1                | 0              | -3.681716               | -4.125634 | -1.268490 |
| 8                | 1                | 0              | 0.578827                | -3.396540 | -1.348883 |
| 9                | 1                | 0              | -1.402740               | -4.794057 | -1.981845 |
| 10               | 6                | 0              | -1.909223               | -0.260676 | 0.835338  |
| 11               | 6                | 0              | -1.657884               | 1.161548  | -1.236365 |
| 12               | 6                | 0              | -2.634186               | 3.419297  | -1.117181 |
| 13               | 1                | 0              | -2.520220               | 4.472800  | -1.419363 |
| 14               | 1                | 0              | -4.030855               | -2.051912 | 0.072186  |
| 15               | 6                | 0              | 0.357309                | -0.986894 | 0.182080  |
| 16               | 6                | 0              | 1.619422                | -0.844914 | -0.135846 |
| 17               | 6                | 0              | 2.902592                | -0.344243 | -0.266789 |
| 18               | 6                | 0              | 3.173251                | 0.694896  | -1.203578 |
| 19               | 6                | 0              | 3.981376                | -0.856779 | 0.508134  |
| 20               | 6                | 0              | 4.456663                | 1.189230  | -1.345772 |
| 21               | 1                | 0              | 2.342538                | 1.100778  | -1.789401 |
| 22               | 6                | 0              | 5.257615                | -0.346859 | 0.348457  |
| 23               | 1                | 0              | 3.778551                | -1.650232 | 1.232993  |

---

|    |   |   |           |           |           |
|----|---|---|-----------|-----------|-----------|
| 24 | 6 | 0 | 5.506242  | 0.673552  | -0.576430 |
| 25 | 1 | 0 | 4.649145  | 1.994019  | -2.060943 |
| 26 | 1 | 0 | 6.076815  | -0.744164 | 0.954573  |
| 27 | 1 | 0 | 6.518157  | 1.070894  | -0.694400 |
| 28 | 6 | 0 | -2.464990 | 0.889918  | -0.015439 |
| 29 | 6 | 0 | -2.464248 | 3.306266  | 0.380488  |
| 30 | 1 | 0 | -3.209980 | 3.918896  | 0.914826  |
| 31 | 1 | 0 | -1.460148 | 3.681993  | 0.665591  |
| 32 | 1 | 0 | -3.485595 | 0.545181  | -0.328283 |
| 33 | 1 | 0 | -1.294715 | 0.301988  | -1.811222 |
| 34 | 1 | 0 | -3.658764 | 3.114396  | -1.401815 |
| 35 | 6 | 0 | -0.397117 | -0.073841 | 1.205275  |
| 36 | 6 | 0 | -0.158350 | -0.620933 | 2.547354  |
| 37 | 7 | 0 | 0.019487  | -1.086607 | 3.593116  |
| 38 | 6 | 0 | 0.114040  | 1.299240  | 1.143255  |
| 39 | 7 | 0 | 0.610388  | 2.344601  | 1.077757  |
| 40 | 1 | 0 | -2.516878 | -0.275714 | 1.756396  |
| 41 | 6 | 0 | -1.613186 | 2.530313  | -1.811571 |
| 42 | 8 | 0 | -2.607967 | 1.981618  | 0.859372  |
| 43 | 1 | 0 | -1.772322 | 2.504157  | -2.905348 |
| 44 | 1 | 0 | -0.598649 | 2.965232  | -1.673286 |

-----

<sup>T</sup>TS3<sub>HH-cis</sub> E(opt)= -1070.250967 hartree

| Center<br>Number | Atomic<br>Number | Atomic<br>Type | Coordinates (Angstroms) |          |           |
|------------------|------------------|----------------|-------------------------|----------|-----------|
|                  |                  |                | X                       | Y        | Z         |
| 1                | 6                | 0              | 3.418796                | 2.442732 | -0.815976 |

S59

|    |   |   |           |           |           |
|----|---|---|-----------|-----------|-----------|
| 2  | 6 | 0 | 3.118961  | 1.613104  | 0.263031  |
| 3  | 6 | 0 | 1.865229  | 1.012851  | 0.358958  |
| 4  | 6 | 0 | 0.885504  | 1.302648  | -0.606117 |
| 5  | 6 | 0 | 1.194485  | 2.121800  | -1.698239 |
| 6  | 6 | 0 | 2.463339  | 2.680535  | -1.804689 |
| 7  | 1 | 0 | 0.423326  | 2.329474  | -2.445082 |
| 8  | 1 | 0 | 2.701637  | 3.329674  | -2.651706 |
| 9  | 6 | 0 | 1.465239  | 0.010907  | 1.408527  |
| 10 | 6 | 0 | 1.148619  | -1.901126 | -0.252398 |
| 11 | 6 | 0 | 3.136014  | -1.640221 | -1.507020 |
| 12 | 1 | 0 | 3.358716  | -0.552703 | -1.500846 |
| 13 | 1 | 0 | 3.865684  | 1.442899  | 1.045666  |
| 14 | 6 | 0 | -0.436147 | 0.770888  | -0.390777 |
| 15 | 6 | 0 | -1.629683 | 0.564124  | -0.687589 |
| 16 | 6 | 0 | -2.988793 | 0.200512  | -0.708952 |
| 17 | 6 | 0 | -3.394067 | -1.036115 | -1.256641 |
| 18 | 6 | 0 | -3.958357 | 1.055955  | -0.141507 |
| 19 | 6 | 0 | -4.732092 | -1.398429 | -1.237759 |
| 20 | 1 | 0 | -2.635496 | -1.700118 | -1.681415 |
| 21 | 6 | 0 | -5.293041 | 0.678694  | -0.127156 |
| 22 | 1 | 0 | -3.634365 | 2.005253  | 0.295595  |
| 23 | 6 | 0 | -5.683780 | -0.544366 | -0.675999 |
| 24 | 1 | 0 | -5.040146 | -2.359708 | -1.657994 |
| 25 | 1 | 0 | -6.039148 | 1.340919  | 0.320567  |
| 26 | 1 | 0 | -6.737466 | -0.837042 | -0.660971 |
| 27 | 6 | 0 | 1.821774  | -1.462972 | 1.003145  |
| 28 | 6 | 0 | 3.807643  | -2.323652 | -0.338141 |
| 29 | 1 | 0 | 3.542949  | -3.396672 | -0.364080 |
| 30 | 1 | 0 | 4.903186  | -2.262551 | -0.442049 |

|    |   |   |           |           |           |
|----|---|---|-----------|-----------|-----------|
| 31 | 8 | 0 | 1.734888  | -1.840877 | -1.465875 |
| 32 | 6 | 0 | 3.350824  | -1.688317 | 0.967448  |
| 33 | 1 | 0 | 3.659335  | -2.306389 | 1.825763  |
| 34 | 1 | 0 | 3.877276  | -0.726843 | 1.088061  |
| 35 | 1 | 0 | 1.391232  | -2.085332 | 1.809546  |
| 36 | 1 | 0 | 0.143660  | -2.328944 | -0.274238 |
| 37 | 1 | 0 | 3.475731  | -2.039972 | -2.474918 |
| 38 | 6 | 0 | -0.033319 | 0.172967  | 1.620229  |
| 39 | 6 | 0 | -0.462084 | 1.372238  | 2.268934  |
| 40 | 7 | 0 | -0.806038 | 2.365547  | 2.767419  |
| 41 | 6 | 0 | -0.873368 | -0.957154 | 1.836722  |
| 42 | 7 | 0 | -1.576946 | -1.874892 | 1.968408  |
| 43 | 1 | 0 | 1.992364  | 0.240307  | 2.357709  |
| 44 | 1 | 0 | 4.403124  | 2.914550  | -0.881597 |

-----

<sup>T</sup>TS3<sub>HH-trans</sub> E(opt)= -1070.249982 hartree

| Center<br>Number | Atomic<br>Number | Atomic<br>Type | Coordinates (Angstroms) |          |           |
|------------------|------------------|----------------|-------------------------|----------|-----------|
|                  |                  |                | X                       | Y        | Z         |
| 1                | 6                | 0              | 2.944298                | 3.520851 | -0.604767 |
| 2                | 6                | 0              | 2.962871                | 2.341832 | 0.134688  |
| 3                | 6                | 0              | 1.811919                | 1.564788 | 0.244434  |
| 4                | 6                | 0              | 0.629309                | 1.981889 | -0.381380 |
| 5                | 6                | 0              | 0.614609                | 3.167688 | -1.129644 |
| 6                | 6                | 0              | 1.769891                | 3.930907 | -1.239390 |
| 7                | 1                | 0              | -0.315507               | 3.479646 | -1.613122 |
| 8                | 1                | 0              | 1.754897                | 4.859614 | -1.816387 |

S61

|    |   |   |           |           |           |
|----|---|---|-----------|-----------|-----------|
| 9  | 6 | 0 | 1.772389  | 0.251804  | 0.991532  |
| 10 | 6 | 0 | 1.961547  | -1.096490 | -1.084025 |
| 11 | 6 | 0 | 3.044159  | -3.183186 | -1.159550 |
| 12 | 1 | 0 | 4.115037  | -2.889950 | -1.163703 |
| 13 | 1 | 0 | 3.881403  | 2.021304  | 0.639717  |
| 14 | 6 | 0 | -0.545032 | 1.158401  | -0.228555 |
| 15 | 6 | 0 | -1.735284 | 0.866219  | -0.464795 |
| 16 | 6 | 0 | -3.031115 | 0.317113  | -0.478020 |
| 17 | 6 | 0 | -3.384458 | -0.689102 | -1.403391 |
| 18 | 6 | 0 | -3.988986 | 0.752944  | 0.464413  |
| 19 | 6 | 0 | -4.659234 | -1.234046 | -1.384638 |
| 20 | 1 | 0 | -2.633493 | -1.038539 | -2.117451 |
| 21 | 6 | 0 | -5.259499 | 0.196671  | 0.472214  |
| 22 | 1 | 0 | -3.705497 | 1.521041  | 1.190065  |
| 23 | 6 | 0 | -5.600245 | -0.793457 | -0.451417 |
| 24 | 1 | 0 | -4.923895 | -2.017759 | -2.099868 |
| 25 | 1 | 0 | -5.993725 | 0.533912  | 1.209137  |
| 26 | 1 | 0 | -6.603310 | -1.229223 | -0.440016 |
| 27 | 6 | 0 | 2.558866  | -0.842949 | 0.249767  |
| 28 | 6 | 0 | 2.549227  | -3.396452 | 0.249435  |
| 29 | 1 | 0 | 1.475096  | -3.648249 | 0.201957  |
| 30 | 1 | 0 | 3.064547  | -4.257892 | 0.703060  |
| 31 | 8 | 0 | 2.289750  | -2.168955 | -1.809716 |
| 32 | 6 | 0 | 2.758395  | -2.135249 | 1.079906  |
| 33 | 1 | 0 | 2.075675  | -2.145051 | 1.945938  |
| 34 | 1 | 0 | 3.778475  | -2.124268 | 1.501558  |
| 35 | 1 | 0 | 3.571070  | -0.395191 | 0.101186  |
| 36 | 1 | 0 | 1.468231  | -0.315919 | -1.670686 |
| 37 | 1 | 0 | 2.942753  | -4.083082 | -1.783226 |

|    |   |   |           |           |           |
|----|---|---|-----------|-----------|-----------|
| 38 | 6 | 0 | 0.315896  | -0.109530 | 1.247865  |
| 39 | 6 | 0 | -0.288479 | 0.513940  | 2.383552  |
| 40 | 7 | 0 | -0.772024 | 1.052162  | 3.294885  |
| 41 | 6 | 0 | -0.215289 | -1.393735 | 0.926626  |
| 42 | 7 | 0 | -0.700265 | -2.422446 | 0.675437  |
| 43 | 1 | 0 | 2.272314  | 0.398563  | 1.971070  |
| 44 | 1 | 0 | 3.849422  | 4.129571  | -0.682916 |

---

<sup>T</sup>TS3<sub>HT-cis</sub> E(opt)= -1070.255044 hartree

---

| Center<br>Number | Atomic<br>Number | Atomic<br>Type | Coordinates (Angstroms) |           |           |
|------------------|------------------|----------------|-------------------------|-----------|-----------|
|                  |                  |                | X                       | Y         | Z         |
| 1                | 6                | 0              | -3.418285               | -3.136493 | -0.669498 |
| 2                | 6                | 0              | -3.292833               | -1.993452 | 0.116057  |
| 3                | 6                | 0              | -2.060388               | -1.357004 | 0.229858  |
| 4                | 6                | 0              | -0.943767               | -1.874076 | -0.439478 |
| 5                | 6                | 0              | -1.072978               | -3.021528 | -1.232475 |
| 6                | 6                | 0              | -2.308908               | -3.646717 | -1.345661 |
| 7                | 1                | 0              | -4.386984               | -3.637168 | -0.752131 |
| 8                | 1                | 0              | -0.193520               | -3.415436 | -1.749477 |
| 9                | 1                | 0              | -2.408300               | -4.546044 | -1.959688 |
| 10               | 6                | 0              | -1.858357               | -0.074002 | 0.993278  |
| 11               | 6                | 0              | -2.293310               | 2.388654  | 1.011505  |
| 12               | 6                | 0              | -1.487623               | 3.574100  | -1.028369 |
| 13               | 1                | 0              | -1.653867               | 4.477537  | -1.637896 |
| 14               | 1                | 0              | -4.160870               | -1.591629 | 0.650670  |
| 15               | 6                | 0              | 0.315416                | -1.197316 | -0.268675 |

|    |   |   |           |           |           |
|----|---|---|-----------|-----------|-----------|
| 16 | 6 | 0 | 1.526681  | -0.995750 | -0.479284 |
| 17 | 6 | 0 | 2.870810  | -0.576712 | -0.477987 |
| 18 | 6 | 0 | 3.311694  | 0.432725  | -1.360599 |
| 19 | 6 | 0 | 3.785935  | -1.143928 | 0.435361  |
| 20 | 6 | 0 | 4.631969  | 0.854250  | -1.329092 |
| 21 | 1 | 0 | 2.591711  | 0.881778  | -2.050377 |
| 22 | 6 | 0 | 5.103903  | -0.711743 | 0.456044  |
| 23 | 1 | 0 | 3.433470  | -1.913801 | 1.128208  |
| 24 | 6 | 0 | 5.530765  | 0.283602  | -0.425114 |
| 25 | 1 | 0 | 4.967005  | 1.641385  | -2.010095 |
| 26 | 1 | 0 | 5.807277  | -1.149827 | 1.169508  |
| 27 | 1 | 0 | 6.570617  | 0.621933  | -0.403171 |
| 28 | 6 | 0 | -2.410886 | 1.129224  | 0.224419  |
| 29 | 6 | 0 | -2.006067 | 2.348802  | -1.749772 |
| 30 | 1 | 0 | -1.520586 | 2.213724  | -2.728695 |
| 31 | 1 | 0 | -3.101410 | 2.438102  | -1.932661 |
| 32 | 1 | 0 | -3.495788 | 0.906693  | 0.032014  |
| 33 | 1 | 0 | -2.570586 | 2.344990  | 2.072055  |
| 34 | 1 | 0 | -0.398144 | 3.463891  | -0.889172 |
| 35 | 6 | 0 | -0.377971 | 0.070651  | 1.321213  |
| 36 | 6 | 0 | 0.109608  | -0.720053 | 2.405937  |
| 37 | 7 | 0 | 0.501626  | -1.392520 | 3.270836  |
| 38 | 6 | 0 | 0.347813  | 1.278879  | 1.093294  |
| 39 | 7 | 0 | 1.023726  | 2.204666  | 0.891045  |
| 40 | 1 | 0 | -2.426706 | -0.122254 | 1.943535  |
| 41 | 6 | 0 | -2.166405 | 3.703547  | 0.332090  |
| 42 | 8 | 0 | -1.743433 | 1.180383  | -1.008769 |
| 43 | 1 | 0 | -1.625214 | 4.415901  | 0.980157  |
| 44 | 1 | 0 | -3.179000 | 4.148172  | 0.195885  |



---

<sup>T</sup>TS3<sub>HT-trans</sub> E(opt)= -1070.252336 hartree

---

| Center<br>Number | Atomic<br>Number | Atomic<br>Type | Coordinates (Angstroms) |           |           |
|------------------|------------------|----------------|-------------------------|-----------|-----------|
|                  |                  |                | X                       | Y         | Z         |
| 1                | 6                | 0              | 3.066706                | 3.474362  | -0.568632 |
| 2                | 6                | 0              | 3.041261                | 2.289496  | 0.162066  |
| 3                | 6                | 0              | 1.868360                | 1.542281  | 0.242249  |
| 4                | 6                | 0              | 0.709222                | 1.995344  | -0.404913 |
| 5                | 6                | 0              | 0.739104                | 3.186940  | -1.142579 |
| 6                | 6                | 0              | 1.916652                | 3.919885  | -1.222913 |
| 7                | 1                | 0              | 3.988667                | 4.059723  | -0.624516 |
| 8                | 1                | 0              | -0.172281               | 3.529154  | -1.640801 |
| 9                | 1                | 0              | 1.937596                | 4.853062  | -1.792400 |
| 10               | 6                | 0              | 1.781899                | 0.219787  | 0.954722  |
| 11               | 6                | 0              | 1.916066                | -1.165071 | -1.152335 |
| 12               | 6                | 0              | 2.952307                | -3.388044 | -0.921801 |
| 13               | 1                | 0              | 2.927585                | -4.434632 | -1.265520 |
| 14               | 1                | 0              | 3.939841                | 1.941384  | 0.683137  |
| 15               | 6                | 0              | -0.486738               | 1.202721  | -0.276174 |
| 16               | 6                | 0              | -1.679367               | 0.915910  | -0.498547 |
| 17               | 6                | 0              | -2.984794               | 0.387793  | -0.483021 |
| 18               | 6                | 0              | -3.392982               | -0.576057 | -1.429363 |
| 19               | 6                | 0              | -3.891250               | 0.802225  | 0.517596  |
| 20               | 6                | 0              | -4.674911               | -1.101577 | -1.375152 |
| 21               | 1                | 0              | -2.678987               | -0.909155 | -2.187731 |
| 22               | 6                | 0              | -5.170236               | 0.267211  | 0.559496  |

|    |   |   |           |           |           |
|----|---|---|-----------|-----------|-----------|
| 23 | 1 | 0 | -3.560020 | 1.533927  | 1.260485  |
| 24 | 6 | 0 | -5.566322 | -0.680938 | -0.385587 |
| 25 | 1 | 0 | -4.984575 | -1.853353 | -2.106256 |
| 26 | 1 | 0 | -5.866077 | 0.586352  | 1.340214  |
| 27 | 1 | 0 | -6.575346 | -1.101111 | -0.346893 |
| 28 | 6 | 0 | 2.508533  | -0.894975 | 0.184390  |
| 29 | 6 | 0 | 2.490482  | -3.315087 | 0.515736  |
| 30 | 1 | 0 | 3.110452  | -3.949442 | 1.170962  |
| 31 | 1 | 0 | 1.447094  | -3.686760 | 0.582782  |
| 32 | 1 | 0 | 3.554163  | -0.514916 | 0.045033  |
| 33 | 1 | 0 | 1.529063  | -0.318246 | -1.730004 |
| 34 | 1 | 0 | 4.004597  | -3.053733 | -0.990738 |
| 35 | 6 | 0 | 0.322007  | -0.113914 | 1.216800  |
| 36 | 6 | 0 | -0.288698 | 0.514335  | 2.344320  |
| 37 | 7 | 0 | -0.792271 | 1.062553  | 3.238521  |
| 38 | 6 | 0 | -0.233807 | -1.377974 | 0.857526  |
| 39 | 7 | 0 | -0.757982 | -2.368727 | 0.543022  |
| 40 | 1 | 0 | 2.298952  | 0.290116  | 1.931525  |
| 41 | 6 | 0 | 2.059241  | -2.503061 | -1.778203 |
| 42 | 8 | 0 | 2.554809  | -2.005327 | 1.048997  |
| 43 | 1 | 0 | 2.438895  | -2.419545 | -2.814230 |
| 44 | 1 | 0 | 1.057266  | -2.976542 | -1.871906 |

---

<sup>s</sup>Int3<sub>HH-cis</sub> E(opt)= -1070.273872 hartree

---

| Center | Atomic | Atomic | Coordinates (Angstroms) |   |   |
|--------|--------|--------|-------------------------|---|---|
| Number | Number | Type   | X                       | Y | Z |

---

|    |   |   |           |           |           |
|----|---|---|-----------|-----------|-----------|
| 1  | 6 | 0 | 4.123120  | 0.059292  | 1.967252  |
| 2  | 6 | 0 | 3.687188  | -0.086958 | 0.652019  |
| 3  | 6 | 0 | 2.330519  | -0.140881 | 0.337012  |
| 4  | 6 | 0 | 1.395314  | -0.057925 | 1.389006  |
| 5  | 6 | 0 | 1.837153  | 0.112474  | 2.711055  |
| 6  | 6 | 0 | 3.194926  | 0.168643  | 2.999621  |
| 7  | 1 | 0 | 1.092917  | 0.181695  | 3.509667  |
| 8  | 1 | 0 | 3.528452  | 0.284571  | 4.034315  |
| 9  | 6 | 0 | 1.900852  | -0.311109 | -1.104154 |
| 10 | 6 | 0 | -0.407029 | 0.894631  | -1.203957 |
| 11 | 6 | 0 | -0.386991 | 3.201420  | -0.648465 |
| 12 | 1 | 0 | -0.071316 | 3.131271  | 0.407897  |
| 13 | 1 | 0 | 4.418198  | -0.181324 | -0.158280 |
| 14 | 6 | 0 | -0.006115 | -0.149210 | 1.136521  |
| 15 | 6 | 0 | -1.221737 | -0.269705 | 1.048614  |
| 16 | 6 | 0 | -2.633241 | -0.375859 | 0.897516  |
| 17 | 6 | 0 | -3.484231 | 0.300735  | 1.790721  |
| 18 | 6 | 0 | -3.185845 | -1.138208 | -0.149464 |
| 19 | 6 | 0 | -4.861944 | 0.212652  | 1.642851  |
| 20 | 1 | 0 | -3.045523 | 0.889119  | 2.601995  |
| 21 | 6 | 0 | -4.567312 | -1.209856 | -0.289706 |
| 22 | 1 | 0 | -2.527405 | -1.659319 | -0.857421 |
| 23 | 6 | 0 | -5.405021 | -0.541179 | 0.601713  |
| 24 | 1 | 0 | -5.519246 | 0.736036  | 2.342829  |
| 25 | 1 | 0 | -4.992159 | -1.799854 | -1.106216 |
| 26 | 1 | 0 | -6.490689 | -0.607275 | 0.485666  |
| 27 | 6 | 0 | 1.023108  | 0.877410  | -1.582867 |
| 28 | 6 | 0 | 0.777310  | 3.389665  | -1.581220 |
| 29 | 1 | 0 | 0.402929  | 3.462020  | -2.618798 |

|    |   |   |           |           |           |
|----|---|---|-----------|-----------|-----------|
| 30 | 1 | 0 | 1.272105  | 4.347349  | -1.356181 |
| 31 | 8 | 0 | -1.068495 | 1.955778  | -0.949130 |
| 32 | 6 | 0 | 1.730307  | 2.220684  | -1.416131 |
| 33 | 1 | 0 | 2.564331  | 2.273834  | -2.133911 |
| 34 | 1 | 0 | 2.188174  | 2.265322  | -0.411497 |
| 35 | 1 | 0 | 0.871074  | 0.664895  | -2.671979 |
| 36 | 1 | 0 | -1.030192 | 0.020860  | -1.453461 |
| 37 | 1 | 0 | -1.166327 | 3.968747  | -0.735393 |
| 38 | 6 | 0 | 1.314241  | -1.684207 | -1.360314 |
| 39 | 6 | 0 | 2.080196  | -2.782930 | -0.926521 |
| 40 | 7 | 0 | 2.768115  | -3.646363 | -0.540439 |
| 41 | 6 | 0 | 0.119746  | -1.850956 | -2.048513 |
| 42 | 7 | 0 | -0.925006 | -1.863323 | -2.594686 |
| 43 | 1 | 0 | 2.829476  | -0.170490 | -1.701315 |
| 44 | 1 | 0 | 5.194319  | 0.082374  | 2.185475  |

-----

<sup>T</sup>Int3<sub>HF-cis</sub> E(opt)= -1070.26461 hartree

| Center<br>Number | Atomic<br>Number | Atomic<br>Type | Coordinates (Angstroms) |          |           |
|------------------|------------------|----------------|-------------------------|----------|-----------|
|                  |                  |                | X                       | Y        | Z         |
| 1                | 6                | 0              | 3.418796                | 2.442732 | -0.815976 |
| 2                | 6                | 0              | 3.118961                | 1.613104 | 0.263031  |
| 3                | 6                | 0              | 1.865229                | 1.012851 | 0.358958  |
| 4                | 6                | 0              | 0.885504                | 1.302648 | -0.606117 |
| 5                | 6                | 0              | 1.194485                | 2.121800 | -1.698239 |
| 6                | 6                | 0              | 2.463339                | 2.680535 | -1.804689 |
| 7                | 1                | 0              | 0.423326                | 2.329474 | -2.445082 |

S68

|    |   |   |           |           |           |
|----|---|---|-----------|-----------|-----------|
| 8  | 1 | 0 | 2.701637  | 3.329674  | -2.651706 |
| 9  | 6 | 0 | 1.465239  | 0.010907  | 1.408527  |
| 10 | 6 | 0 | 1.148619  | -1.901126 | -0.252398 |
| 11 | 6 | 0 | 3.136014  | -1.640221 | -1.507020 |
| 12 | 1 | 0 | 3.358716  | -0.552703 | -1.500846 |
| 13 | 1 | 0 | 3.865684  | 1.442899  | 1.045666  |
| 14 | 6 | 0 | -0.436147 | 0.770888  | -0.390777 |
| 15 | 6 | 0 | -1.629683 | 0.564124  | -0.687589 |
| 16 | 6 | 0 | -2.988793 | 0.200512  | -0.708952 |
| 17 | 6 | 0 | -3.394067 | -1.036115 | -1.256641 |
| 18 | 6 | 0 | -3.958357 | 1.055955  | -0.141507 |
| 19 | 6 | 0 | -4.732092 | -1.398429 | -1.237759 |
| 20 | 1 | 0 | -2.635496 | -1.700118 | -1.681415 |
| 21 | 6 | 0 | -5.293041 | 0.678694  | -0.127156 |
| 22 | 1 | 0 | -3.634365 | 2.005253  | 0.295595  |
| 23 | 6 | 0 | -5.683780 | -0.544366 | -0.675999 |
| 24 | 1 | 0 | -5.040146 | -2.359708 | -1.657994 |
| 25 | 1 | 0 | -6.039148 | 1.340919  | 0.320567  |
| 26 | 1 | 0 | -6.737466 | -0.837042 | -0.660971 |
| 27 | 6 | 0 | 1.821774  | -1.462972 | 1.003145  |
| 28 | 6 | 0 | 3.807643  | -2.323652 | -0.338141 |
| 29 | 1 | 0 | 3.542949  | -3.396672 | -0.364080 |
| 30 | 1 | 0 | 4.903186  | -2.262551 | -0.442049 |
| 31 | 8 | 0 | 1.734888  | -1.840877 | -1.465875 |
| 32 | 6 | 0 | 3.350824  | -1.688317 | 0.967448  |
| 33 | 1 | 0 | 3.659335  | -2.306389 | 1.825763  |
| 34 | 1 | 0 | 3.877276  | -0.726843 | 1.088061  |
| 35 | 1 | 0 | 1.391232  | -2.085332 | 1.809546  |
| 36 | 1 | 0 | 0.143660  | -2.328944 | -0.274238 |

|    |   |   |           |           |           |
|----|---|---|-----------|-----------|-----------|
| 37 | 1 | 0 | 3.475731  | -2.039972 | -2.474918 |
| 38 | 6 | 0 | -0.033319 | 0.172967  | 1.620229  |
| 39 | 6 | 0 | -0.462084 | 1.372238  | 2.268934  |
| 40 | 7 | 0 | -0.806038 | 2.365547  | 2.767419  |
| 41 | 6 | 0 | -0.873368 | -0.957154 | 1.836722  |
| 42 | 7 | 0 | -1.576946 | -1.874892 | 1.968408  |
| 43 | 1 | 0 | 1.992364  | 0.240307  | 2.357709  |
| 44 | 1 | 0 | 4.403124  | 2.914550  | -0.881597 |

-----

<sup>s</sup>TS4<sub>HH-cis</sub> E(opt)= -1070.272697 hartree

| Center<br>Number | Atomic<br>Number | Atomic<br>Type | Coordinates (Angstroms) |           |           |
|------------------|------------------|----------------|-------------------------|-----------|-----------|
|                  |                  |                | X                       | Y         | Z         |
| 1                | 6                | 0              | -4.389111               | -1.508601 | -0.709884 |
| 2                | 6                | 0              | -3.810262               | -0.420964 | -0.059909 |
| 3                | 6                | 0              | -2.426314               | -0.272927 | 0.038947  |
| 4                | 6                | 0              | -1.607967               | -1.271518 | -0.538072 |
| 5                | 6                | 0              | -2.197628               | -2.361243 | -1.198480 |
| 6                | 6                | 0              | -3.578411               | -2.482284 | -1.284978 |
| 7                | 1                | 0              | -1.543199               | -3.121821 | -1.633372 |
| 8                | 1                | 0              | -4.020524               | -3.342527 | -1.794681 |
| 9                | 6                | 0              | -1.879948               | 0.941551  | 0.754373  |
| 10               | 6                | 0              | 0.418314                | 1.699689  | 0.046063  |
| 11               | 6                | 0              | 0.897703                | 1.768536  | -2.284282 |
| 12               | 1                | 0              | 0.778334                | 0.705993  | -2.564524 |
| 13               | 1                | 0              | -4.452893               | 0.339176  | 0.396550  |
| 14               | 6                | 0              | -0.184312               | -1.205501 | -0.475032 |

|    |   |   |           |           |           |
|----|---|---|-----------|-----------|-----------|
| 15 | 6 | 0 | 1.033335  | -1.211380 | -0.416882 |
| 16 | 6 | 0 | 2.443921  | -1.127642 | -0.233412 |
| 17 | 6 | 0 | 3.333746  | -1.251223 | -1.312968 |
| 18 | 6 | 0 | 2.950693  | -0.877939 | 1.054402  |
| 19 | 6 | 0 | 4.702709  | -1.123235 | -1.107201 |
| 20 | 1 | 0 | 2.935648  | -1.453990 | -2.312373 |
| 21 | 6 | 0 | 4.320513  | -0.751053 | 1.249620  |
| 22 | 1 | 0 | 2.250782  | -0.794768 | 1.892456  |
| 23 | 6 | 0 | 5.197894  | -0.871329 | 0.171802  |
| 24 | 1 | 0 | 5.391155  | -1.222920 | -1.951231 |
| 25 | 1 | 0 | 4.708092  | -0.558201 | 2.253712  |
| 26 | 1 | 0 | 6.275403  | -0.771278 | 0.330390  |
| 27 | 6 | 0 | -1.045650 | 1.875060  | -0.159365 |
| 28 | 6 | 0 | -0.370305 | 2.556470  | -2.476204 |
| 29 | 1 | 0 | -0.190232 | 3.612130  | -2.200673 |
| 30 | 1 | 0 | -0.639956 | 2.549709  | -3.544036 |
| 31 | 8 | 0 | 1.288164  | 1.770575  | -0.887141 |
| 32 | 6 | 0 | -1.466275 | 1.939010  | -1.624739 |
| 33 | 1 | 0 | -2.413308 | 2.496113  | -1.708543 |
| 34 | 1 | 0 | -1.676249 | 0.923456  | -2.001662 |
| 35 | 1 | 0 | -1.158108 | 2.899989  | 0.275376  |
| 36 | 1 | 0 | 0.855936  | 1.760745  | 1.049725  |
| 37 | 1 | 0 | 1.768515  | 2.179830  | -2.810811 |
| 38 | 6 | 0 | -1.062303 | 0.579671  | 1.995114  |
| 39 | 6 | 0 | -1.159716 | -0.691983 | 2.590364  |
| 40 | 7 | 0 | -1.215673 | -1.767488 | 3.044812  |
| 41 | 6 | 0 | -0.514400 | 1.658937  | 2.694624  |
| 42 | 7 | 0 | -0.007093 | 2.646836  | 3.076926  |
| 43 | 1 | 0 | -2.774757 | 1.532079  | 1.046731  |

44            1            0            -5.477933    -1.594373    -0.761482

---

<sup>s</sup>3aa E(opt)= -1070.337302 hartree

---

| Center<br>Number | Atomic<br>Number | Atomic<br>Type | Coordinates (Angstroms) |           |           |
|------------------|------------------|----------------|-------------------------|-----------|-----------|
|                  |                  |                | X                       | Y         | Z         |
| 1                | 6                | 0              | -2.493291               | -3.523779 | -0.490508 |
| 2                | 6                | 0              | -2.452695               | -2.229390 | 0.022086  |
| 3                | 6                | 0              | -1.249890               | -1.531732 | 0.139399  |
| 4                | 6                | 0              | -0.052790               | -2.178954 | -0.248268 |
| 5                | 6                | 0              | -0.106515               | -3.482798 | -0.766877 |
| 6                | 6                | 0              | -1.317523               | -4.150169 | -0.893568 |
| 7                | 1                | 0              | 0.829390                | -3.963273 | -1.065455 |
| 8                | 1                | 0              | -1.342549               | -5.164303 | -1.301228 |
| 9                | 6                | 0              | -1.193865               | -0.162286 | 0.746169  |
| 10               | 6                | 0              | -1.492087               | 1.960309  | 0.722308  |
| 11               | 6                | 0              | -1.765763               | 3.198328  | -1.322598 |
| 12               | 1                | 0              | -1.797337               | 4.274854  | -1.549030 |
| 13               | 1                | 0              | -3.388452               | -1.763552 | 0.344404  |
| 14               | 6                | 0              | 1.216159                | -1.544100 | -0.099514 |
| 15               | 6                | 0              | 2.305357                | -1.011706 | 0.017647  |
| 16               | 6                | 0              | 3.566384                | -0.357154 | 0.145743  |
| 17               | 6                | 0              | 3.679594                | 1.020684  | -0.109189 |
| 18               | 6                | 0              | 4.712263                | -1.075506 | 0.526562  |
| 19               | 6                | 0              | 4.906741                | 1.660583  | 0.017830  |
| 20               | 1                | 0              | 2.791013                | 1.582230  | -0.415667 |
| 21               | 6                | 0              | 5.935932                | -0.428627 | 0.651135  |



|    |   |   |           |           |           |
|----|---|---|-----------|-----------|-----------|
| 22 | 1 | 0 | 4.624732  | -2.147415 | 0.724952  |
| 23 | 6 | 0 | 6.037384  | 0.939011  | 0.398509  |
| 24 | 1 | 0 | 4.982740  | 2.732729  | -0.184008 |
| 25 | 1 | 0 | 6.821261  | -0.997227 | 0.949464  |
| 26 | 1 | 0 | 7.002080  | 1.444464  | 0.497846  |
| 27 | 6 | 0 | -0.446785 | 1.024834  | 0.094314  |
| 28 | 6 | 0 | -0.498924 | 2.555845  | -1.842602 |
| 29 | 1 | 0 | -0.465004 | 2.662130  | -2.938937 |
| 30 | 1 | 0 | 0.381749  | 3.093560  | -1.440712 |
| 31 | 8 | 0 | -1.883698 | 3.111352  | 0.094123  |
| 32 | 6 | 0 | -0.449416 | 1.094022  | -1.426669 |
| 33 | 1 | 0 | -1.321428 | 0.562064  | -1.850645 |
| 34 | 1 | 0 | 0.442271  | 0.581999  | -1.824722 |
| 35 | 1 | 0 | 0.575329  | 1.190276  | 0.473156  |
| 36 | 1 | 0 | -1.209260 | 2.222122  | 1.757366  |
| 37 | 1 | 0 | -2.647646 | 2.735798  | -1.804594 |
| 38 | 6 | 0 | -2.486724 | 0.721009  | 0.853797  |
| 39 | 6 | 0 | -3.411281 | 0.638991  | -0.272183 |
| 40 | 7 | 0 | -4.152440 | 0.598970  | -1.162046 |
| 41 | 6 | 0 | -3.217061 | 0.613117  | 2.109771  |
| 42 | 7 | 0 | -3.746185 | 0.523653  | 3.136964  |
| 43 | 1 | 0 | -0.817536 | -0.257504 | 1.783363  |
| 44 | 1 | 0 | -3.452617 | -4.041321 | -0.572744 |

---

<sup>s</sup>3(aa)' E(opt)= -1070.33925 hartree

---

| Center | Atomic | Atomic | Coordinates (Angstroms) |   |   |
|--------|--------|--------|-------------------------|---|---|
| Number | Number | Type   | X                       | Y | Z |

---

|    |   |   |           |           |           |
|----|---|---|-----------|-----------|-----------|
| 1  | 6 | 0 | -2.186758 | 3.913558  | -0.303266 |
| 2  | 6 | 0 | -2.308874 | 2.533529  | -0.453096 |
| 3  | 6 | 0 | -1.187215 | 1.706250  | -0.462988 |
| 4  | 6 | 0 | 0.093108  | 2.290786  | -0.306458 |
| 5  | 6 | 0 | 0.204292  | 3.681531  | -0.158657 |
| 6  | 6 | 0 | -0.926961 | 4.487661  | -0.157698 |
| 7  | 1 | 0 | -3.082750 | 4.540023  | -0.298457 |
| 8  | 1 | 0 | 1.199829  | 4.116859  | -0.037540 |
| 9  | 1 | 0 | -0.824708 | 5.569535  | -0.037444 |
| 10 | 6 | 0 | -1.269571 | 0.216355  | -0.591840 |
| 11 | 6 | 0 | -2.793147 | -0.775879 | 0.588658  |
| 12 | 6 | 0 | -3.356706 | -3.062933 | 0.140759  |
| 13 | 1 | 0 | -4.129629 | -3.748507 | 0.519291  |
| 14 | 1 | 0 | -3.307314 | 2.099917  | -0.564561 |
| 15 | 6 | 0 | 1.261613  | 1.475386  | -0.280317 |
| 16 | 6 | 0 | 2.257987  | 0.773647  | -0.248887 |
| 17 | 6 | 0 | 3.446513  | -0.014002 | -0.216963 |
| 18 | 6 | 0 | 3.380180  | -1.416682 | -0.157727 |
| 19 | 6 | 0 | 4.705108  | 0.612370  | -0.244272 |
| 20 | 6 | 0 | 4.548946  | -2.168409 | -0.127270 |
| 21 | 1 | 0 | 2.405183  | -1.911735 | -0.122654 |
| 22 | 6 | 0 | 5.867281  | -0.148298 | -0.214814 |
| 23 | 1 | 0 | 4.753883  | 1.704187  | -0.287879 |
| 24 | 6 | 0 | 5.792871  | -1.539833 | -0.157009 |
| 25 | 1 | 0 | 4.485702  | -3.258974 | -0.076711 |
| 26 | 1 | 0 | 6.841472  | 0.348498  | -0.236016 |
| 27 | 1 | 0 | 6.709348  | -2.136443 | -0.132853 |
| 28 | 6 | 0 | -1.237545 | -0.548267 | 0.810092  |

|    |   |   |           |           |           |
|----|---|---|-----------|-----------|-----------|
| 29 | 6 | 0 | -2.621997 | -0.450426 | -0.902308 |
| 30 | 6 | 0 | -3.592343 | -2.698597 | -1.308860 |
| 31 | 1 | 0 | -3.571071 | -3.614467 | -1.921414 |
| 32 | 1 | 0 | -4.601727 | -2.259374 | -1.420752 |
| 33 | 8 | 0 | -3.406483 | -1.930534 | 0.999108  |
| 34 | 6 | 0 | -2.532763 | -1.707172 | -1.762308 |
| 35 | 1 | 0 | -1.537615 | -2.178981 | -1.659474 |
| 36 | 1 | 0 | -2.639769 | -1.445234 | -2.827575 |
| 37 | 1 | 0 | -2.381668 | -3.577472 | 0.245709  |
| 38 | 1 | 0 | -0.445905 | -0.137992 | -1.234054 |
| 39 | 6 | 0 | -0.897352 | 0.234012  | 1.989412  |
| 40 | 6 | 0 | -0.429188 | -1.756009 | 0.744892  |
| 41 | 7 | 0 | -0.679399 | 0.889023  | 2.919908  |
| 42 | 7 | 0 | 0.217062  | -2.713508 | 0.647954  |
| 43 | 1 | 0 | -3.407413 | 0.211036  | -1.304619 |
| 44 | 1 | 0 | -3.282495 | 0.063324  | 1.114670  |

---

## 8. Characterization data for the products

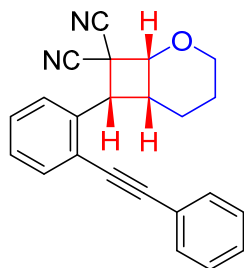

(±)-**(1*R*,6*R*,7*R*)-7-(2-(Phenylethynyl)phenyl)-2-oxabicyclo[4.2.0]octane-8,8-dicarbonitrile (3aa)**: White solid. m.p. 143.8–144.6 °C. <sup>1</sup>H NMR (600 MHz, CDCl<sub>3</sub>) δ 7.64–7.60 (m, 2H), 7.493–7.489 (m, 2H), 7.45–7.43 (m, 1H), 7.39–7.34 (m, 4H), 4.86 (d, *J* = 7.8 Hz, 1H), 4.45 (t, *J* = 12.0 Hz, 1H), 4.16 (d, *J* = 7.8 Hz, 1H), 3.89–3.87 (m, 1H), 3.54–3.48 (m, 1H), 2.18–2.15 (m, 1H), 1.87–1.81 (m, 1H), 1.70–1.68 (m, 1H), 1.61–1.55 (m, 1H); <sup>13</sup>C NMR (150 MHz, CDCl<sub>3</sub>) δ 134.9, 133.6, 131.3, 128.9, 128.7, 128.6, 127.9, 127.0, 122.6, 122.2, 115.3, 114.8, 94.2, 87.2, 73.7, 64.6, 44.0, 40.1, 36.7, 22.1, 19.7. HRMS (ESI) [M+Na]<sup>+</sup> Calcd. for [C<sub>23</sub>H<sub>18</sub>N<sub>2</sub>NaO]<sup>+</sup>: 361.1311, Found: 361.1315.

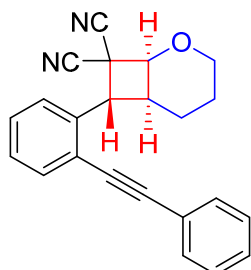

(±)-**(1*S*,6*S*,7*R*)-7-(2-(phenylethynyl)phenyl)-2-oxabicyclo[4.2.0]octane-8,8-dicarbonitrile [3(aa)']**: White solid. m.p. 145.1–145.6 °C. <sup>1</sup>H NMR (600 MHz, CDCl<sub>3</sub>) δ 7.67–7.65 (m, 3H), 7.44–7.42 (m, 2H), 7.40–7.36 (m, 4H), 5.10 (d, *J* = 11.4 Hz, 1H), 4.59 (t, *J* = 5.4 Hz, 1H), 4.15–4.13 (m, 1H), 3.46 (td, *J*<sub>1</sub> = 1.8 Hz, *J*<sub>2</sub> = 12.0 Hz, 1H), 3.21–3.17 (m, 1H), 2.00–1.92 (m, 1H), 1.82–1.76 (m, 1H), 1.72–1.69 (m, 1H), 1.62–1.58 (m, 1H); <sup>13</sup>C NMR (150 MHz, CDCl<sub>3</sub>) δ 134.9, 133.2, 131.9, 128.9, 128.72, 128.70, 128.4, 126.9, 124.4, 122.7, 113.0, 112.4, 95.5, 86.3, 73.1, 65.3, 47.0, 38.2, 34.2, 21.0, 20.3. HRMS (ESI) [M+Na]<sup>+</sup> Calcd. for [C<sub>23</sub>H<sub>18</sub>N<sub>2</sub>NaO]<sup>+</sup>: 361.1311, Found: 361.1315.

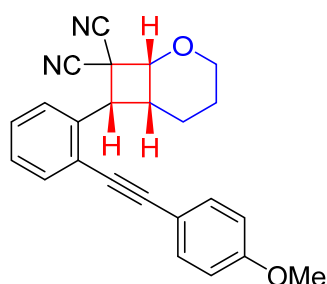

(±)-**(1*R*,6*R*,7*R*)-7-(2-((4-Methoxyphenyl)ethynyl)phenyl)-2-**

**oxabicyclo[4.2.0]octane-8,8-dicarbonitrile (3ba):** White solid. m.p. 142.7–143.9 °C. <sup>1</sup>H NMR (400 MHz, CDCl<sub>3</sub>) δ 7.62–7.57 (m, 2H), 7.45–7.39 (m, 3H), 7.36–7.32 (m, 1H), 6.93–6.89 (m, 2H), 4.86 (d, *J* = 7.6 Hz, 1H), 4.45 (td, *J*<sub>1</sub> = 3.2 Hz, *J*<sub>2</sub> = 11.6 Hz, 1H), 4.15 (d, *J* = 8.0 Hz, 1H), 3.90–3.86 (m, 1H), 3.84 (s, 3H), 3.54–3.45 (m, 1H), 2.19–2.13 (m, 1H), 1.89–1.78 (m, 1H), 1.72–1.67 (m, 1H), 1.64–1.52 (m, 1H); <sup>13</sup>C NMR (100 MHz, CDCl<sub>3</sub>) δ 160.0, 134.7, 133.4, 132.8, 128.3, 127.8, 126.9, 122.5, 115.4, 114.9, 114.6, 114.2, 94.4, 86.0, 73.7, 64.6, 55.3, 44.0, 40.1, 36.7, 22.1, 19.7. HRMS (ESI) [M+Na]<sup>+</sup> Calcd. for [C<sub>24</sub>H<sub>20</sub>N<sub>2</sub>NaO<sub>2</sub>]<sup>+</sup>: 391.1417, Found: 391.1417.

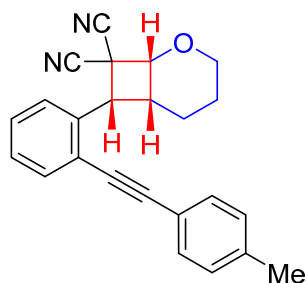

(±)-**(1*R*,6*R*,7*R*)-7-(2-(*p*-Tolyethynyl)phenyl)-2-oxabicyclo[4.2.0]octane-8,8-**  
**dicarbonitrile (3ca):** White solid. m.p. 123.8–125.4 °C. <sup>1</sup>H NMR (400 MHz, CDCl<sub>3</sub>) δ 7.63–7.57 (m, 2H), 7.44–7.32 (m, 4H), 7.20–7.18 (m, 2H), 4.85 (d, *J* = 7.6 Hz, 1H), 4.44 (td, *J*<sub>1</sub> = 2.8 Hz, *J*<sub>2</sub> = 11.6 Hz, 1H), 4.14 (d, *J* = 8.0 Hz, 1H), 3.89–3.85 (m, 1H), 3.55–3.46 (m, 1H), 2.38 (s, 3H), 2.18–2.12 (m, 1H), 1.88–1.77 (m, 1H), 1.71–1.66 (m, 1H), 1.62–1.51 (m, 1H); <sup>13</sup>C NMR (100 MHz, CDCl<sub>3</sub>) δ 139.2, 134.9, 133.4, 131.2, 129.3, 128.5, 127.8, 126.9, 122.4, 119.5, 115.3, 114.8, 94.5, 86.6, 73.7, 64.6, 44.0, 40.1, 36.7, 22.1, 21.5, 19.7. HRMS (ESI) [M+Na]<sup>+</sup> Calcd. for [C<sub>24</sub>H<sub>20</sub>N<sub>2</sub>NaO]<sup>+</sup>: 375.1468, Found: 375.1473.

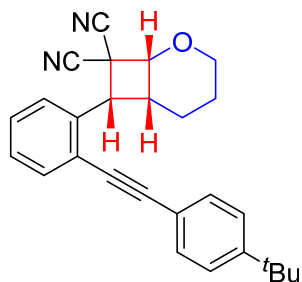

(±)-**(1R,6R,7R)-7-(2-((4-(*tert*-Butyl)phenyl)ethynyl)phenyl)-2-oxabicyclo[4.2.0]octane-8,8-dicarbonitrile (3da)**: White solid. m.p. 143.6–144.8 °C.  $^1\text{H}$  NMR (600 MHz,  $\text{CDCl}_3$ )  $\delta$  7.64–7.62 (m, 1H), 7.60–7.58 (m, 1H), 7.44–7.40 (m, 5H), 7.36–7.33 (m, 1H), 4.86 (d,  $J = 7.8$  Hz, 1H), 4.45 (td,  $J_1 = 3.0$  Hz,  $J_2 = 12.0$  Hz, 1H), 4.15 (d,  $J = 7.8$  Hz, 1H), 3.89–3.87 (m, 1H), 3.55–3.49 (m, 1H), 2.18–2.14 (m, 1H), 1.87–1.79 (m, 1H), 1.70–1.67 (m, 1H), 1.62–1.54 (m, 1H), 1.34 (s, 9H);  $^{13}\text{C}$  NMR (150 MHz,  $\text{CDCl}_3$ )  $\delta$  152.3, 134.9, 133.5, 131.0, 128.5, 127.8, 126.9, 125.6, 122.4, 119.5, 115.3, 114.9, 94.4, 86.6, 73.7, 64.6, 44.0, 40.1, 36.7, 34.8, 22.1, 19.7. HRMS (ESI)  $[\text{M}+\text{Na}]^+$  Calcd. for  $[\text{C}_{27}\text{H}_{26}\text{N}_2\text{NaO}]^+$ : 417.1937, Found: 417.1939.

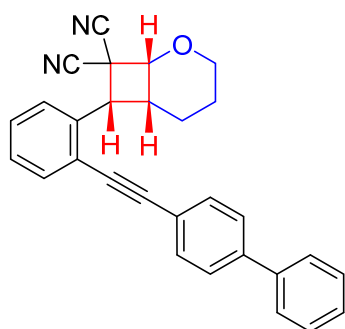

(±)-**(1R,6R,7R)-7-(2-([1,1'-Biphenyl]-4-ylethynyl)phenyl)-2-oxabicyclo[4.2.0]octane-8,8-dicarbonitrile (3ea)**: White solid. m.p. 144.4–145.3 °C.  $^1\text{H}$  NMR (600 MHz,  $\text{CDCl}_3$ )  $\delta$  7.64–7.60 (m, 6H), 7.57–7.55 (m, 2H), 7.47–7.42 (m, 3H), 7.39–7.34 (m, 2H), 4.88 (d,  $J = 7.8$  Hz, 1H), 4.45 (td,  $J_1 = 3.0$  Hz,  $J_2 = 12.0$  Hz, 1H), 4.17 (d,  $J = 7.8$  Hz, 1H), 3.89–3.87 (m, 1H), 3.56–3.50 (m, 1H), 2.19–2.15 (m, 1H), 1.88–1.81 (m, 1H), 1.71–1.68 (m, 1H), 1.63–1.55 (m, 1H);  $^{13}\text{C}$  NMR (150 MHz,  $\text{CDCl}_3$ )  $\delta$  141.6, 140.0, 134.9, 133.6, 131.7, 128.9, 128.7, 127.85, 127.81, 127.2, 127.0, 122.2, 121.4, 115.3, 114.8, 94.2, 87.9, 73.6, 64.6, 44.0, 40.1, 36.7, 22.1, 19.8. HRMS (ESI)  $[\text{M}+\text{Na}]^+$  Calcd. for  $[\text{C}_{29}\text{H}_{22}\text{N}_2\text{NaO}]^+$ : 437.1624, Found: 437.1624.

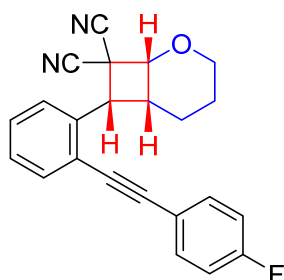

**(±)-(1*R*,6*R*,7*R*)-7-(2-((4-Fluorophenyl)ethynyl)phenyl)-2-**

**oxabicyclo[4.2.0]octane-8,8-dicarbonitrile (3fa):** White solid. m.p. 144.6–145.2 °C. <sup>1</sup>H NMR (400 MHz, CDCl<sub>3</sub>) δ 7.62–7.58 (m, 2H), 7.50–7.41 (m, 3H), 7.37–7.33 (m, 1H), 7.10–7.05 (m, 2H), 4.86 (d, *J* = 7.6 Hz, 1H), 4.44 (td, *J*<sub>1</sub> = 2.8 Hz, *J*<sub>2</sub> = 11.6 Hz, 1H), 4.15 (d, *J* = 8.0 Hz, 1H), 3.90–3.86 (m, 1H), 3.51–3.42 (m, 1H), 2.17–2.12 (m, 1H), 1.90–1.79 (m, 1H), 1.72–1.68 (m, 1H), 1.62–1.52 (m, 1H); <sup>19</sup>F NMR (376 MHz, CDCl<sub>3</sub>) δ –109.6; <sup>13</sup>C NMR (100 MHz, CDCl<sub>3</sub>) δ 162.7 (d, *J* = 249.4 Hz), 134.8, 133.6, 133.3 (d, *J* = 8.5 Hz), 128.7, 127.8, 127.0, 122.0, 118.6 (d, *J* = 3.4 Hz), 115.9 (d, *J* = 22.1 Hz), 115.3, 114.8, 93.2, 86.9, 73.6, 64.6, 43.9, 40.0, 36.8, 22.1, 19.8. HRMS (ESI) [M+Na]<sup>+</sup> Calcd. for [C<sub>23</sub>H<sub>17</sub>FN<sub>2</sub>NaO]<sup>+</sup>: 379.1217, Found: 379.1218.

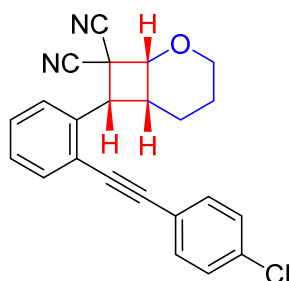

**(±)-(1*R*,6*R*,7*R*)-7-(2-((4-Chlorophenyl)ethynyl)phenyl)-2-**

**oxabicyclo[4.2.0]octane-8,8-dicarbonitrile (3ga):** White solid. m.p. 147.8–148.5 °C. <sup>1</sup>H NMR (400 MHz, CDCl<sub>3</sub>) δ 7.63–7.59 (m, 2H), 7.47–7.42 (m, 3H), 7.37–7.34 (m, 3H), 4.86 (d, *J* = 7.6 Hz, 1H), 4.44 (td, *J*<sub>1</sub> = 2.8 Hz, *J*<sub>2</sub> = 11.6 Hz, 1H), 4.15 (d, *J* = 8.0 Hz, 1H), 3.90–3.86 (m, 1H), 3.50–3.41 (m, 1H), 2.17–2.11 (m, 1H), 1.90–1.79 (m, 1H), 1.73–1.68 (m, 1H), 1.63–1.52 (m, 1H); <sup>13</sup>C NMR (100 MHz, CDCl<sub>3</sub>) δ 134.93, 134.91, 133.6, 132.5, 128.90, 128.87, 127.9, 127.1, 121.9, 121.0, 115.3, 114.7, 93.2, 88.2, 73.6, 64.5, 43.9, 40.0, 36.8, 22.1,

19.8. HRMS (ESI)  $[M+Na]^+$  Calcd. for  $[C_{23}H_{17}ClN_2NaO]^+$ : 395.0922, Found: 395.0924.

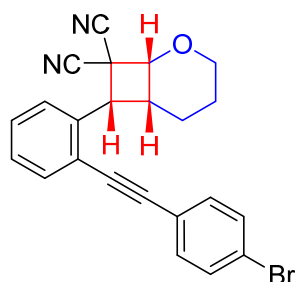

(±)-(1*R*,6*R*,7*R*)-7-(2-((4-Bromophenyl)ethynyl)phenyl)-2-oxabicyclo[4.2.0]octane-8,8-dicarbonitrile (**3ha**): White solid. m.p. 147.1–147.4 °C.  $^1H$  NMR (600 MHz,  $CDCl_3$ )  $\delta$  7.63–7.59 (m, 2H), 7.53–7.52 (m, 2H), 7.47–7.44 (m, 1H), 7.36–7.35 (m, 3H), 4.87 (d,  $J = 7.8$  Hz, 1H), 4.45 (t,  $J = 12.0$  Hz, 1H), 4.15 (d,  $J = 7.8$  Hz, 1H), 3.90–3.88 (m, 1H), 3.48–3.42 (m, 1H), 2.15–2.14 (m, 1H), 1.88–1.82 (m, 1H), 1.72–1.70 (m, 1H), 1.61–1.59 (m, 1H);  $^{13}C$  NMR (150 MHz,  $CDCl_3$ )  $\delta$  135.0, 133.7, 132.7, 131.9, 129.0, 128.0, 127.2, 123.3, 121.9, 121.5, 115.3, 114.8, 93.2, 88.4, 73.7, 64.6, 44.0, 40.1, 36.9, 22.2, 19.9. HRMS (ESI)  $[M+Na]^+$  Calcd. for  $[C_{23}H_{17}^{79}BrN_2NaO]^+$ : 417.0597, Found: 417.0599.

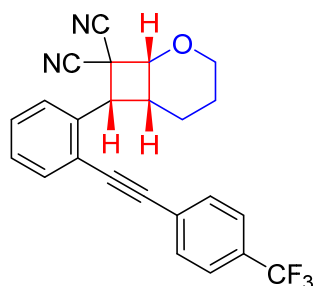

(±)-(1*R*,6*R*,7*R*)-7-(2-((4-(Trifluoromethyl)phenyl)ethynyl)phenyl)-2-oxabicyclo[4.2.0] octane-8,8-dicarbonitrile (**3ia**): White solid. m.p. 134.8–146.4 °C.  $^1H$  NMR (600 MHz,  $CDCl_3$ )  $\delta$  7.65–7.60 (m, 6H), 7.49–7.46 (m, 1H), 7.40–7.37 (m, 1H), 4.87 (d,  $J = 7.8$  Hz, 1H), 4.45 (t,  $J = 11.4$  Hz, 1H), 4.17 (d,  $J = 7.8$  Hz, 1H), 3.90–3.88 (m, 1H), 3.49–3.43 (m, 1H), 2.17–2.13 (m, 1H), 1.90–1.83 (m, 1H), 1.72–1.70 (m, 1H), 1.62–1.55 (m, 1H);  $^{19}F$  NMR (376 MHz,  $CDCl_3$ )  $\delta$  -62.9;  $^{13}C$  NMR (150 MHz,  $CDCl_3$ )  $\delta$  135.1, 133.9, 132.1, 131.6,



130.5 (q,  $J = 32.6$  Hz), 129.3, 127.2, 125.52 (q,  $J = 3.3$  Hz), 125.46 (q,  $J = 249.8$  Hz), 121.5, 115.3, 114.7, 92.8, 89.5, 73.6, 64.6, 43.9, 40.0, 37.0, 22.1, 19.9. HRMS (ESI)  $[M+Na]^+$  Calcd. for  $[C_{24}H_{17}F_3N_2NaO]^+$ : 429.1185, Found: 429.1183.

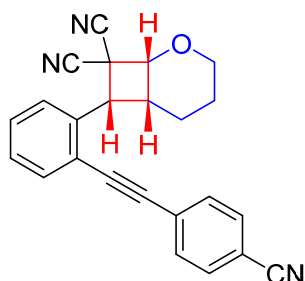

(±)-(1*R*,6*R*,7*R*)-7-(2-((4-Cyanophenyl)ethynyl)phenyl)-2-

oxabicyclo[4.2.0]octane-8,8-dicarbonitrile (**3ja**): White solid. m.p. 138.3–138.8 °C.  $^1H$  NMR (400 MHz,  $CDCl_3$ )  $\delta$  7.69–7.67 (m, 2H), 7.64–7.59 (m, 4H), 7.51–7.47 (m, 1H), 7.41–7.37 (m, 1H), 4.87 (d,  $J = 7.6$  Hz, 1H), 4.45 (td,  $J_1 = 2.8$  Hz,  $J_2 = 11.6$  Hz, 1H), 4.16 (d,  $J = 8.0$  Hz, 1H), 3.91–3.88 (m, 1H), 3.48–3.39 (m, 1H), 2.16–2.11 (m, 1H), 1.92–1.82 (m, 1H), 1.74–1.70 (m, 1H), 1.65–1.57 (m, 1H);  $^{13}C$  NMR (100 MHz,  $CDCl_3$ )  $\delta$  135.2, 134.1, 132.2, 131.9, 129.6, 128.1, 127.4, 121.3, 118.2, 115.3, 114.7, 112.2, 92.6, 91.5, 73.7, 64.6, 43.9, 40.0, 37.1, 22.1, 20.0. HRMS (ESI)  $[M+Na]^+$  Calcd. for  $[C_{24}H_{17}N_3NaO]^+$ : 386.1264, Found: 386.1269.

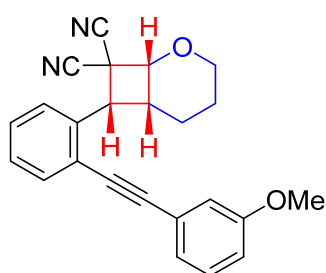

(±)-(1*R*,6*R*,7*R*)-7-(2-((3-Methoxyphenyl)ethynyl)phenyl)-2-

oxabicyclo[4.2.0]octane-8,8-dicarbonitrile (**3ka**): White solid. m.p. 152.7–152.9 °C.  $^1H$  NMR (400 MHz,  $CDCl_3$ )  $\delta$  7.63–7.59 (m, 2H), 7.44–7.41 (m, 1H), 7.36–7.27 (m, 2H), 7.09–7.07 (m, 1H), 7.02 (s, 1H), 6.95–6.92 (m, 1H), 4.85 (d,  $J = 7.6$  Hz, 1H), 4.43 (td,  $J_1 = 2.8$  Hz,  $J_2 = 11.6$  Hz, 1H), 4.14 (d,  $J = 8.0$  Hz, 1H), 3.88–3.86 (m, 1H), 3.82 (s, 3H), 3.54–3.45 (m, 1H), 2.18–2.13 (m, 1H),

1.88–1.77 (m, 1H), 1.70–1.66 (m, 1H), 1.63–1.51 (m, 1H);  $^{13}\text{C}$  NMR (100 MHz,  $\text{CDCl}_3$ )  $\delta$  159.4, 134.9, 133.5, 129.6, 128.7, 127.8, 126.9, 123.7, 123.5, 122.0, 116.4, 115.3, 115.0, 114.8, 94.1, 87.0, 73.6, 64.5, 55.2, 43.9, 40.0, 36.7, 22.1, 19.7. HRMS (ESI)  $[\text{M}+\text{Na}]^+$  Calcd. for  $[\text{C}_{24}\text{H}_{20}\text{N}_2\text{NaO}_2]^+$ : 391.1417, Found: 391.1422.

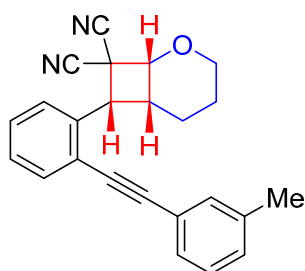

**(±)-(1R,6R,7R)-7-(2-(*m*-Tolylolethynyl)phenyl)-2-oxabicyclo[4.2.0]octane-8,8-dicarbonitrile (3la):** White solid. m.p. 131.5–132.1 °C.  $^1\text{H}$  NMR (600 MHz,  $\text{CDCl}_3$ )  $\delta$  7.65–7.63 (m, 1H), 7.60–7.59 (m, 1H), 7.45–7.42 (m, 1H), 7.37–7.34 (m, 1H), 7.31–7.26 (m, 3H), 7.21–7.20 (m, 1H), 4.87 (d,  $J = 7.8$  Hz, 1H), 4.45 (td,  $J_1 = 3.0$  Hz,  $J_2 = 12.0$  Hz, 1H), 4.15 (d,  $J = 8.4$  Hz, 1H), 3.90–3.87 (m, 1H), 3.55–3.49 (m, 1H), 2.38 (s, 3H), 2.18–2.14 (m, 1H), 1.87–1.80 (m, 1H), 1.71–1.68 (m, 1H), 1.63–1.55 (m, 1H);  $^{13}\text{C}$  NMR (150 MHz,  $\text{CDCl}_3$ )  $\delta$  138.4, 134.9, 133.5, 131.8, 129.8, 128.7, 128.5, 128.4, 127.9, 127.0, 122.4, 122.3, 115.3, 114.9, 94.4, 86.9, 73.7, 64.7, 44.0, 40.1, 36.7, 22.2, 21.3, 19.7. HRMS (ESI)  $[\text{M}+\text{Na}]^+$  Calcd. for  $[\text{C}_{24}\text{H}_{20}\text{N}_2\text{NaO}]^+$ : 375.1468, Found: 375.1469.

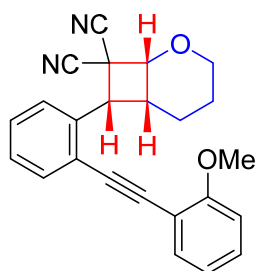

**(±)-(1R,6R,7R)-7-(2-((2-Methoxyphenyl)ethynyl)phenyl)-2-oxabicyclo[4.2.0]octane-8,8-dicarbonitrile (3ma):** White solid. m.p. 156.4–157.8 °C.  $^1\text{H}$  NMR (600 MHz,  $\text{CDCl}_3$ )  $\delta$  7.70–7.69 (m, 1H), 7.61–7.59 (m, 1H), 7.46–7.41 (m, 2H), 7.37–7.33 (m, 2H), 6.98–6.96 (m, 1H), 6.94–6.92 (m, 1H), 4.85 (d,  $J = 7.8$  Hz, 1H), 4.46 (td,  $J_1 = 3.0$  Hz,  $J_2 = 12.0$  Hz, 1H), 4.22 (d,  $J =$

8.4 Hz, 1H), 3.92 (s, 3H), 3.89–3.87 (m, 1H), 3.76–3.70 (m, 1H), 2.15–2.11 (m, 1H), 1.83–1.75 (m, 1H), 1.70–1.66 (m, 1H), 1.59–1.52 (m, 1H);  $^{13}\text{C}$  NMR (150 MHz,  $\text{CDCl}_3$ )  $\delta$  160.0, 135.0, 133.22, 133.19, 130.3, 128.5, 127.7, 126.7, 122.6, 120.7, 115.4, 115.0, 111.8, 110.7, 91.1, 90.9, 73.9, 64.7, 55.7, 43.9, 39.6, 36.4, 22.2, 19.5. HRMS (ESI)  $[\text{M}+\text{Na}]^+$  Calcd. for  $[\text{C}_{24}\text{H}_{20}\text{N}_2\text{NaO}_2]^+$ : 391.1417, Found: 391.1422.

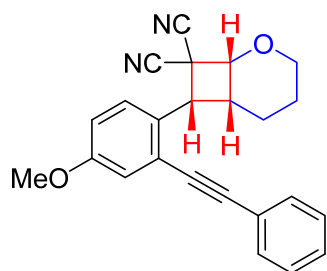

**(±)-(1*R*,6*R*,7*R*)-7-(4-Methoxy-2-(phenylethynyl)phenyl)-2-oxabicyclo[4.2.0]octane-8,8-dicarbonitrile (3na):** White solid. m.p. 145.1–145.6 °C.  $^1\text{H}$  NMR (600 MHz,  $\text{CDCl}_3$ )  $\delta$  7.63–7.61 (m, 1H), 7.58–7.57 (m, 1H), 7.44–7.40 (m, 3H), 7.36–7.33 (m, 1H), 6.92–6.90 (m, 2H), 4.86 (d,  $J=7.8$  Hz, 1H), 4.45 (td,  $J_1 = 3.0$  Hz,  $J_2 = 12.0$  Hz, 1H), 4.15 (d,  $J = 7.8$  Hz, 1H), 3.90–3.87 (m, 1H), 3.84 (s, 3H), 3.53–3.47 (m, 1H), 2.17–2.14 (m, 1H), 1.88–1.80 (m, 1H), 1.71–1.68 (m, 1H), 1.62–1.54 (m, 1H);  $^{13}\text{C}$  NMR (150 MHz,  $\text{CDCl}_3$ )  $\delta$  160.1, 134.7, 133.4, 132.8, 128.4, 127.8, 126.9, 122.6, 115.4, 114.9, 114.6, 114.3, 94.4, 86.0, 73.7, 64.6, 55.4, 44.0, 40.1, 36.8, 22.2, 19.8. HRMS (ESI)  $[\text{M}+\text{Na}]^+$  Calcd. For  $[\text{C}_{24}\text{H}_{20}\text{N}_2\text{NaO}_2]^+$ : 391.1417, Found: 391.1417.

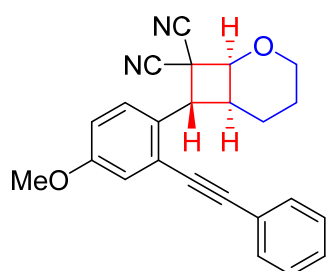

**(±)-(1*S*,6*S*,7*R*)-7-(4-Methoxy-2-(phenylethynyl)phenyl)-2-oxabicyclo[4.2.0]octane-8,8-dicarbonitrile [3(na)']:** White solid. m.p. 144.3–145.6 °C.  $^1\text{H}$  NMR (600 MHz,  $\text{CDCl}_3$ )  $\delta$  7.67–7.65 (m, 2H), 7.38–7.34 (m, 4H), 7.16 (s, 1H),

6.97–6.96 (m, 1H), 5.05 (d,  $J = 11.4$  Hz, 1H), 4.57–4.56 (m, 1H), 4.12 (d,  $J = 11.4$  Hz, 1H), 3.84 (s, 3H), 3.44 (t,  $J = 12.0$  Hz, 1H), 3.14–3.12 (m, 1H), 1.98–1.91 (m, 1H), 1.79–1.73 (m, 1H), 1.69–1.66 (m, 1H), 1.60–1.57 (m, 1H);  $^{13}\text{C}$  NMR (150 MHz,  $\text{CDCl}_3$ )  $\delta$  159.6, 131.9, 128.7, 128.4, 128.3, 128.1, 127.1, 125.5, 122.5, 117.8, 115.0, 113.1, 112.4, 95.0, 86.3, 72.9, 65.3, 55.4, 46.8, 38.4, 34.5, 20.9, 20.3. HRMS (ESI)  $[\text{M}+\text{Na}]^+$  Calcd. For  $[\text{C}_{24}\text{H}_{20}\text{N}_2\text{NaO}_2]^+$ : 391.1417, Found: 391.1418.

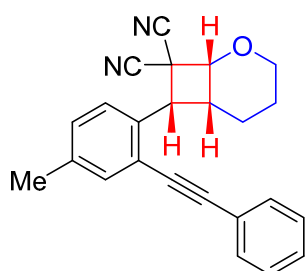

**(±)-(1*R*,6*R*,7*R*)-7-(4-Methyl-2-(phenylethynyl)phenyl)-2-**

**oxabicyclo[4.2.0]octane-8,8-dicarbonitrile (30a):** White solid. m.p. 143.9–144.4 °C.  $^1\text{H}$  NMR (400 MHz,  $\text{CDCl}_3$ )  $\delta$  7.51–7.47 (m, 3H), 7.42 (s, 1H), 7.38–7.37 (m, 3H), 7.24–7.22 (m, 1H), 4.84 (d,  $J = 7.6$  Hz, 1H), 4.43 (td,  $J_1 = 2.8$  Hz,  $J_2 = 11.6$  Hz, 1H), 4.12 (d,  $J = 8.0$  Hz, 1H), 3.88–3.85 (m, 1H), 3.51–3.42 (m, 1H), 2.36 (s, 3H), 2.17–2.12 (m, 1H), 1.89–1.78 (m, 1H), 1.70–1.66 (m, 1H), 1.62–1.51 (m, 1H);  $^{13}\text{C}$  NMR (100 MHz,  $\text{CDCl}_3$ )  $\delta$  137.7, 134.0, 131.9, 131.2, 129.5, 128.7, 128.5, 126.9, 122.6, 121.9, 115.4, 114.9, 93.7, 87.4, 73.6, 64.6, 43.7, 40.0, 36.8, 22.1, 20.7, 19.7. HRMS (ESI)  $[\text{M}+\text{Na}]^+$  Calcd. for  $[\text{C}_{24}\text{H}_{20}\text{N}_2\text{NaO}]^+$ : 375.1468, Found: 375.1469.

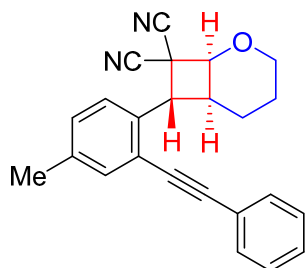

**(±)-(1*S*,6*S*,7*R*)-7-(4-Methyl-2-(phenylethynyl)phenyl)-2-oxabicyclo**

**[4.2.0]octane-8,8-dicarbonitrile [3(0a)']:** White solid. m.p. 175.8–176.2 °C.  $^1\text{H}$  NMR (600 MHz,  $\text{CDCl}_3$ )  $\delta$  7.66–7.64 (m, 2H), 7.48 (s, 1H), 7.37–7.34 (m, 3H),

7.32–7.31 (m, 1H), 7.24–7.23 (m, 1H), 5.06 (d,  $J = 11.4$  Hz, 1H), 4.58–4.57 (m, 1H), 4.13 (d,  $J = 11.4$  Hz, 1H), 3.45 (t,  $J = 12.0$  Hz, 1H), 3.17–3.15 (m, 1H), 2.37 (s, 3H), 1.99–1.92 (m, 1H), 1.81–1.75 (m, 1H), 1.70–1.68 (m, 1H), 1.60–1.57 (m, 1H);  $^{13}\text{C}$  NMR (150 MHz,  $\text{CDCl}_3$ )  $\delta$  138.9, 133.8, 132.0, 131.9, 129.6, 128.6, 128.3, 126.8, 124.2, 122.8, 113.1, 112.4, 95.0, 86.5, 73.0, 65.3, 46.9, 38.3, 34.3, 21.0, 20.9, 20.3. HRMS (ESI)  $[\text{M}+\text{Na}]^+$  Calcd. for  $[\text{C}_{24}\text{H}_{20}\text{N}_2\text{NaO}]^+$ : 375.1468, Found: 375.1467.

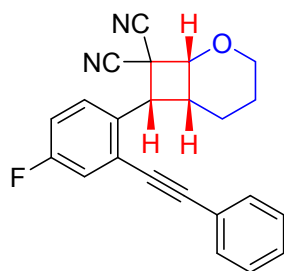

**(±)-(1*R*,6*R*,7*R*)-7-(4-Fluoro-2-(phenylethynyl)phenyl)-2-oxabicyclo[4.2.0]octane-8,8-dicarbonitrile (3pa):** White solid. m.p. 148.8–150.6 °C.  $^1\text{H}$  NMR (400 MHz,  $\text{CDCl}_3$ )  $\delta$  7.63–7.60 (m, 1H), 7.51–7.49 (m, 2H), 7.41–7.39 (m, 3H), 7.33–7.30 (m, 1H), 7.17–7.13 (m, 1H), 4.86 (d,  $J = 7.6$  Hz, 1H), 4.44 (td,  $J_1 = 2.8$  Hz,  $J_2 = 11.6$  Hz, 1H), 4.13 (d,  $J = 8.0$  Hz, 1H), 3.90–3.87 (m, 1H), 3.52–3.43 (m, 1H), 2.16–2.10 (m, 1H), 1.89–1.79 (m, 1H), 1.74–1.69 (m, 1H), 1.64–1.53 (m, 1H);  $^{19}\text{F}$  NMR (376 MHz,  $\text{CDCl}_3$ )  $\delta$  -113.7;  $^{13}\text{C}$  NMR (100 MHz,  $\text{CDCl}_3$ )  $\delta$  161.7 (d,  $J = 247.3$  Hz), 131.4, 130.9 (d,  $J = 3.3$  Hz), 129.3, 128.8, 128.7, 124.3 (d,  $J = 9.4$  Hz), 122.0, 120.3 (d,  $J = 22.9$  Hz), 116.0 (d,  $J = 21.5$  Hz), 115.2, 114.7, 95.2, 86.0 (d,  $J = 2.9$  Hz), 73.7, 64.6, 43.5, 40.0, 36.9, 22.1, 19.7. HRMS (ESI)  $[\text{M}+\text{Na}]^+$  Calcd. for  $[\text{C}_{23}\text{H}_{18}\text{FN}_2\text{NaO}]^+$ : 357.1398, Found: 357.1399.

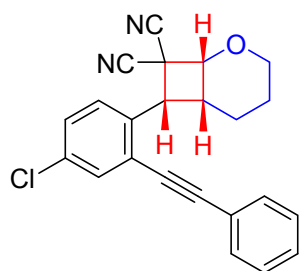

**(±)-(1*R*,6*R*,7*R*)-7-(4-Chloro-2-(phenylethynyl)phenyl)-2-**

**oxabicyclo[4.2.0]octane-8,8-dicarbonitrile (3qa):** White solid. m.p. 149.3–149.5 °C. <sup>1</sup>H NMR (400 MHz, CDCl<sub>3</sub>) δ 7.60–7.56 (m, 2H), 7.51–7.48 (m, 2H), 7.42–7.38 (m, 4H), 4.86 (d, *J* = 7.6 Hz, 1H), 4.44 (td, *J*<sub>1</sub> = 2.8 Hz, *J*<sub>2</sub> = 11.6 Hz, 1H), 4.12 (d, *J* = 8.0 Hz, 1H), 3.90–3.87 (m, 1H), 3.53–3.44 (m, 1H), 2.16–2.11 (m, 1H), 1.88–1.77 (m, 1H), 1.73–1.69 (m, 1H), 1.64–1.52 (m, 1H); <sup>13</sup>C NMR (100 MHz, CDCl<sub>3</sub>) δ 133.9, 133.4, 133.2, 131.4, 129.3, 128.8, 128.7, 128.3, 124.0, 122.0, 115.1, 114.6, 95.5, 85.9, 73.7, 64.6, 43.6, 40.0, 36.8, 22.1, 19.7. HRMS (ESI) [M+Na]<sup>+</sup> Calcd. for [C<sub>23</sub>H<sub>17</sub>ClN<sub>2</sub>NaO]<sup>+</sup>: 395.0922, Found: 395.0926.

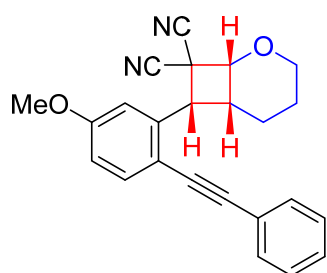

**(±)-(1*R*,6*R*,7*R*)-7-(5-Methoxy-2-(phenylethynyl)phenyl)-2-**

**oxabicyclo[4.2.0]octane-8,8-dicarbonitrile (3ra):** White solid. m.p. 130.8–132.2 °C. <sup>1</sup>H NMR (600 MHz, CDCl<sub>3</sub>) δ 7.52–7.51 (m, 1H), 7.47–7.46 (m, 2H), 7.39–7.35 (m, 3H), 7.19–7.18 (m, 1H), 6.88–6.86 (m, 1H), 4.86 (d, *J* = 7.8 Hz, 1H), 4.45 (td, *J*<sub>1</sub> = 3.0 Hz, *J*<sub>2</sub> = 12.0 Hz, 1H), 4.14 (d, *J* = 8.4 Hz, 1H), 3.90–3.87 (m, 4H), 3.54–3.48 (m, 1H), 2.17–2.13 (m, 1H), 1.87–1.80 (m, 1H), 1.71–1.68 (m, 1H), 1.62–1.54 (m, 1H); <sup>13</sup>C NMR (150 MHz, CDCl<sub>3</sub>) δ 159.8, 136.6, 134.9, 131.1, 128.54, 128.52, 122.9, 115.3, 114.9, 114.0, 113.5, 113.1, 92.7, 87.2, 73.6, 64.7, 55.5, 44.0, 40.0, 36.7, 22.1, 19.7. HRMS (ESI) [M+Na]<sup>+</sup> Calcd. for [C<sub>24</sub>H<sub>20</sub>N<sub>2</sub>NaO<sub>2</sub>]<sup>+</sup>: 391.1417, Found: 391.1422.

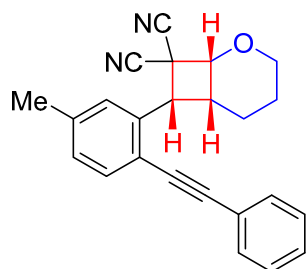

**(±)-(1*R*,6*R*,7*R*)-7-(5-Methyl-2-(phenylethynyl)phenyl)-2-**

**oxabicyclo[4.2.0]octane-8,8-dicarbonitrile (3sa):** White solid. m.p. 139.2–140.6 °C. <sup>1</sup>H NMR (400 MHz, CDCl<sub>3</sub>) δ 7.50–7.45 (m, 3H), 7.40–7.36 (m, 4H), 7.17–7.15 (m, 1H), 4.86 (d, *J* = 7.6 Hz, 1H), 4.45 (td, *J*<sub>1</sub> = 3.2 Hz, *J*<sub>2</sub> = 11.6 Hz, 1H), 4.11 (d, *J* = 8.0 Hz, 1H), 3.91–3.87 (m, 1H), 3.55–3.46 (m, 1H), 2.44 (s, 3H), 2.20–2.15 (m, 1H), 1.89–1.78 (m, 1H), 1.72–1.67 (m, 1H), 1.64–1.56 (m, 1H); <sup>13</sup>C NMR (100 MHz, CDCl<sub>3</sub>) δ 139.2, 134.8, 133.5, 131.2, 128.7, 128.62, 128.57, 127.7, 122.8, 119.0, 115.4, 114.9, 93.4, 87.4, 73.6, 64.6, 43.9, 40.1, 36.7, 22.2, 21.6, 19.7. HRMS (ESI) [M+Na]<sup>+</sup> Calcd. for [C<sub>24</sub>H<sub>20</sub>N<sub>2</sub>NaO]<sup>+</sup>: 375.1468, Found: 375.1473.

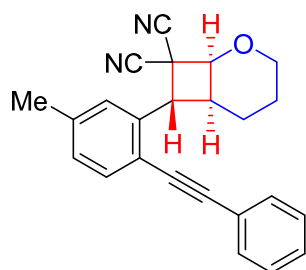

**(±)-(1*S*,6*S*,7*R*)-7-(5-Methyl-2-(phenylethynyl)phenyl)-2-oxabicyclo**

**[4.2.0]octane-8,8-dicarbonitrile [3(sa)']:** White solid. m.p. 144.4–145.5 °C. <sup>1</sup>H NMR (600 MHz, CDCl<sub>3</sub>) δ 7.65–7.63 (m, 2H), 7.54–7.53 (m, 1H), 7.38–7.34 (m, 3H), 7.21–7.19 (m, 2H), 5.07 (d, *J* = 11.4 Hz, 1H), 4.59 (d, *J* = 4.8 Hz, 1H), 4.15–4.13 (m, 1H), 3.46 (td, *J*<sub>1</sub> = 1.8 Hz, *J*<sub>2</sub> = 12.0 Hz, 1H), 3.20–3.16 (m, 1H), 2.42 (s, 3H), 1.99–1.91 (m, 1H), 1.83–1.76 (m, 1H), 1.73–1.68 (m, 1H), 1.62–1.58 (m, 1H); <sup>13</sup>C NMR (150 MHz, CDCl<sub>3</sub>) δ 139.0, 134.7, 133.1, 131.8, 129.7, 128.5, 128.3, 127.6, 122.9, 121.4, 113.0, 112.4, 94.7, 86.5, 73.1, 65.3, 47.0, 38.2, 34.1, 21.7, 21.1, 20.3. HRMS (ESI) [M+Na]<sup>+</sup> Calcd. for [C<sub>24</sub>H<sub>20</sub>N<sub>2</sub>NaO]<sup>+</sup>: 375.1468, Found: 375.1469.

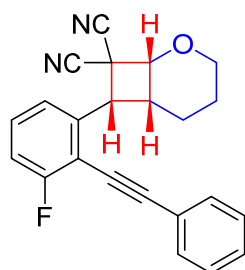

**(±)-(1*R*,6*R*,7*R*)-7-(3-Fluoro-2-(phenylethynyl)phenyl)-2-**

**oxabicyclo[4.2.0]octane-8,8-dicarbonitrile (3ta):** White solid. m.p. 158.7–158.8 °C. <sup>1</sup>H NMR (600 MHz, CDCl<sub>3</sub>) δ 7.53–7.51 (m, 2H), 7.45–7.39 (m, 5H), 7.16–7.13 (m, 1H), 4.87 (d, *J* = 7.8 Hz, 1H), 4.45 (td, *J*<sub>1</sub> = 3.0 Hz, *J*<sub>2</sub> = 12.0 Hz, 1H), 4.13 (d, *J* = 8.4 Hz, 1H), 3.91–3.88 (m, 1H), 3.55–3.49 (m, 1H), 2.19–2.15 (m, 1H), 1.88–1.80 (m, 1H), 1.73–1.69 (m, 1H), 1.63–1.55 (m, 1H); <sup>19</sup>F NMR (376 MHz, CDCl<sub>3</sub>) δ –107.2; <sup>13</sup>C NMR (150 MHz, CDCl<sub>3</sub>) δ 163.4 (d, *J* = 251.4 Hz), 137.3, 131.4, 129.9 (d, *J* = 8.7 Hz), 129.2, 128.6, 122.6 (d, *J* = 3.3 Hz), 122.2, 115.2 (d, *J* = 15.0 Hz), 115.1, 114.7, 111.1, 111.0, 99.6 (d, *J* = 3.8 Hz), 80.3, 73.6, 64.6, 43.7 (d, *J* = 2.7 Hz), 40.1, 36.9, 22.1, 19.7. HRMS (ESI) [M+Na]<sup>+</sup> Calcd. for [C<sub>23</sub>H<sub>17</sub>FN<sub>2</sub>NaO]<sup>+</sup>: 379.1217, Found: 379.1216.

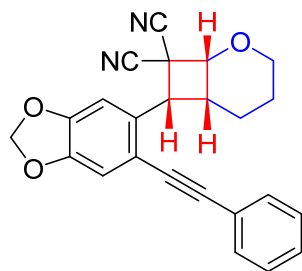

**(±)-(1*R*,6*R*,7*R*)-7-(6-(Phenylethynyl)benzo[*d*][1,3]dioxol-5-yl)-2-**

**oxabicyclo[4.2.0] octane-8,8-dicarbonitrile (3ua):** White solid. m.p. 178.2–178.8 °C. <sup>1</sup>H NMR (600 MHz, CDCl<sub>3</sub>) δ 7.47–7.45 (m, 2H), 7.38–7.36 (m, 3H), 7.16 (s, 1H), 7.02 (s, 1H), 6.04 (s, 2H), 4.82 (d, *J* = 7.8 Hz, 1H), 4.44 (td, *J*<sub>1</sub> = 3.0 Hz, *J*<sub>2</sub> = 12.0 Hz, 1H), 4.14 (d, *J* = 8.4 Hz, 1H), 3.89–3.87 (m, 1H), 3.47–3.41 (m, 1H), 2.16–2.12 (m, 1H), 1.94–1.87 (m, 1H), 1.74–1.70 (m, 1H), 1.61–1.54 (m, 1H); <sup>13</sup>C NMR (150 MHz, CDCl<sub>3</sub>) δ 148.4, 147.1, 131.2, 129.7, 128.7, 128.6, 122.7, 115.7, 115.3, 114.8, 112.9, 107.7, 102.0, 93.1, 87.2, 73.7, 64.6, 43.8, 40.1, 37.0, 22.1, 19.7. HRMS (ESI) [M+Na]<sup>+</sup> Calcd. for [C<sub>24</sub>H<sub>18</sub>N<sub>2</sub>NaO<sub>3</sub>]<sup>+</sup>: 405.1210, Found: 405.1212.



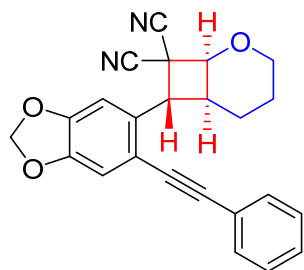

(±)-(1*S*,6*S*,7*R*)-7-(6-(Phenylethynyl)benzo[*d*][1,3]dioxol-5-yl)-2-oxabicyclo[4.2.0] octane-8,8-dicarbonitrile [3(ua)']: White solid. m.p. 182.8–183.0 °C. <sup>1</sup>H NMR (600 MHz, CDCl<sub>3</sub>) δ 7.63–7.61 (m, 2H), 7.38–7.34 (m, 3H), 7.07 (s, 1H), 6.91 (s, 1H), 6.05–6.04 (s, 2H), 5.09 (d, *J* = 11.4 Hz, 1H), 4.58–4.57 (m, 1H), 4.13 (d, *J* = 11.4 Hz, 1H), 3.45 (td, *J*<sub>1</sub> = 1.8 Hz, *J*<sub>2</sub> = 12.0 Hz, 1H), 3.07–3.03 (m, 1H), 1.99–1.91 (m, 1H), 1.80–1.74 (m, 1H), 1.70–1.67 (m, 1H), 1.62–1.58 (m, 1H); <sup>13</sup>C NMR (150 MHz, CDCl<sub>3</sub>) δ 148.5, 147.9, 131.8, 129.8, 128.5, 128.4, 122.8, 118.1, 113.1, 112.5, 112.3, 107.3, 102.0, 94.0, 86.3, 72.9, 65.3, 47.1, 38.3, 34.9, 21.0, 20.3. HRMS (ESI) [M+Na]<sup>+</sup> Calcd. for [C<sub>24</sub>H<sub>18</sub>N<sub>2</sub>NaO<sub>3</sub>]<sup>+</sup>: 405.1210, Found: 405.1212.

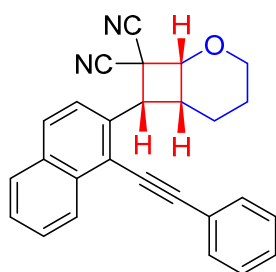

(±)-(1*R*,6*R*,7*R*)-7-(1-(Phenylethynyl)naphthalen-2-yl)-2-oxabicyclo[4.2.0]octane-8,8-dicarbonitrile (3va): White solid. m.p. 132.6–133.2 °C. <sup>1</sup>H NMR (400 MHz, CDCl<sub>3</sub>) δ 8.46–8.44 (m, 1H), 7.95–7.89 (m, 2H), 7.74–7.72 (m, 1H), 7.65–7.56 (m, 4H), 7.47–7.44 (m, 3H), 4.92 (d, *J* = 7.6 Hz, 1H), 4.45 (td, *J*<sub>1</sub> = 2.0 Hz, *J*<sub>2</sub> = 11.6 Hz, 1H), 4.40 (d, *J* = 8.0 Hz, 1H), 3.91–3.88 (m, 1H), 3.68–3.59 (m, 1H), 2.27–2.21 (m, 1H), 1.94–1.84 (m, 1H), 1.71–1.68 (m, 1H), 1.65–1.55 (m, 1H); <sup>13</sup>C NMR (100 MHz, CDCl<sub>3</sub>) δ 133.8, 133.7, 132.3, 131.4, 129.1, 129.0, 128.7, 128.3, 127.6, 127.0, 126.0, 124.0, 122.7,

119.6, 115.5, 115.0, 100.3, 85.4, 73.8, 64.6, 44.8, 40.5, 37.1, 22.2, 20.0. HRMS (ESI)  $[M+Na]^+$  Calcd. for  $[C_{27}H_{20}N_2NaO]^+$ : 411.1468, Found: 411.1467.

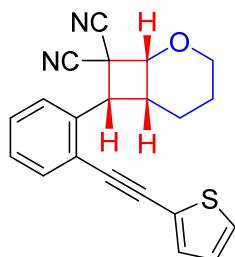

**(±)-(1*R*,6*R*,7*R*)-7-(2-(Thiophen-2-ylethynyl)phenyl)-2-oxabicyclo[4.2.0]octane-8,8-dicarbonitrile (3wa)**: White solid. m.p. 113.8–115.0 °C.  $^1H$  NMR (600 MHz,  $CDCl_3$ )  $\delta$  7.62–7.58 (m, 2H), 7.46–7.44 (m, 1H), 7.37–7.36 (m, 2H), 7.29–7.28 (m, 1H), 7.06–7.05 (m, 1H), 4.87 (d,  $J = 7.8$  Hz, 1H), 4.45 (td,  $J_1 = 1.8$  Hz,  $J_2 = 12.0$  Hz, 1H), 4.12 (d,  $J = 7.8$  Hz, 1H), 3.90–3.89 (m, 1H), 3.52–3.46 (m, 1H), 2.18–2.15 (m, 1H), 1.87–1.80 (m, 1H), 1.72–1.69 (m, 1H), 1.64–1.59 (m, 1H);  $^{13}C$  NMR (150 MHz,  $CDCl_3$ )  $\delta$  135.0, 133.3, 132.1, 128.9, 128.0, 127.9, 127.4, 127.1, 122.5, 121.8, 115.3, 114.9, 91.0, 87.6, 73.6, 64.7, 44.0, 40.2, 36.8, 22.2, 19.8. HRMS (ESI)  $[M+Na]^+$  Calcd. for  $[C_{21}H_{16}N_2NaOS]^+$ : 367.0876, Found: 367.0878.

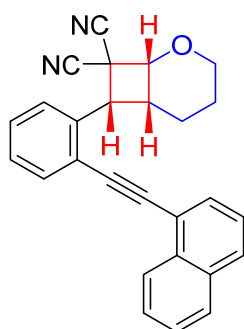

**(±)-(1*R*,6*R*,7*R*)-7-(2-(Naphthalen-1-ylethynyl)phenyl)-2-oxabicyclo[4.2.0]octane-8,8-dicarbonitrile (3xa)**: White solid. m.p. 129.2–130.8 °C.  $^1H$  NMR (400 MHz,  $CDCl_3$ )  $\delta$  8.34–8.32 (m, 1H), 7.89–7.87 (m, 2H), 7.73–7.69 (m, 3H), 7.63–7.53 (m, 2H), 7.49–7.44 (m, 2H), 7.41–7.37 (m, 1H), 4.84 (d,  $J = 7.6$  Hz, 1H), 4.43 (td,  $J_1 = 2.8$  Hz,  $J_2 = 11.6$  Hz, 1H), 4.24 (d,  $J = 8.0$

Hz, 1H), 3.86–3.83 (m, 1H), 3.58–3.49 (m, 1H), 2.20–2.15 (m, 1H), 1.91–1.80 (m, 1H), 1.68–1.64 (m, 1H), 1.57–1.46 (m, 1H);  $^{13}\text{C}$  NMR (100 MHz,  $\text{CDCl}_3$ )  $\delta$  134.9, 133.6, 133.2, 133.0, 130.3, 129.4, 128.8, 128.5, 127.9, 127.1, 127.0, 126.6, 125.6, 125.2, 122.3, 120.1, 115.3, 114.8, 92.5, 91.8, 73.7, 64.6, 44.0, 40.0, 36.7, 22.0, 19.7. HRMS (ESI)  $[\text{M}+\text{Na}]^+$  Calcd. for  $[\text{C}_{27}\text{H}_{20}\text{N}_2\text{NaO}]^+$ : 411.1468, Found: 411.1469.

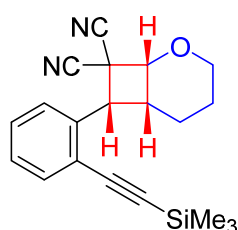

**(±)-(1*R*,6*R*,7*R*)-7-(2-((Trimethylsilyl)ethynyl)phenyl)-2-oxabicyclo[4.2.0]octane-8,8-dicarbonitrile (3ya)**: White solid. m.p. 126.9–128.0 °C.  $^1\text{H}$  NMR (600 MHz,  $\text{CDCl}_3$ )  $\delta$  7.57–7.52 (m, 2H), 7.43–7.40 (m, 1H), 7.32–7.29 (m, 1H), 4.84 (d,  $J = 7.8$  Hz, 1H), 4.44 (td,  $J_1 = 3.0$  Hz,  $J_2 = 12.0$  Hz, 1H), 4.09 (d,  $J = 8.4$  Hz, 1H), 3.90–3.88 (m, 1H), 3.48–3.42 (m, 1H), 2.15–2.12 (m, 1H), 1.82–1.75 (m, 1H), 1.71–1.68 (m, 1H), 1.58–1.52 (m, 1H), 0.26 (s, 9H);  $^{13}\text{C}$  NMR (150 MHz,  $\text{CDCl}_3$ )  $\delta$  135.5, 133.9, 128.9, 127.7, 126.9, 122.0, 115.3, 114.8, 102.9, 99.8, 73.6, 64.6, 43.9, 40.1, 36.7, 22.1, 19.6, -0.3. HRMS (ESI)  $[\text{M}+\text{H}]^+$  Calcd. for  $[\text{C}_{20}\text{H}_{23}\text{N}_2\text{OSi}]^+$ : 335.1574, Found: 335.1579.

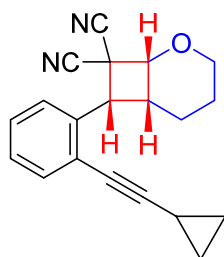

**(±)-(1*R*,6*R*,7*R*)-7-(2-(Cyclopropylethynyl)phenyl)-2-oxabicyclo[4.2.0]octane-8,8-dicarbonitrile (3za)**: White solid. m.p. 127.5–128.8 °C.  $^1\text{H}$  NMR (600 MHz,  $\text{CDCl}_3$ )  $\delta$  7.52–7.51 (m, 1H), 7.44–7.43 (m, 1H),

7.35–7.32 (m, 1H), 7.28–7.25 (m, 1H), 4.84 (d,  $J = 7.8$  Hz, 1H), 4.43 (td,  $J_1 = 3.0$  Hz,  $J_2 = 12.0$  Hz, 1H), 4.05 (d,  $J = 8.4$  Hz, 1H), 3.90–3.87 (m, 1H), 3.40–3.34 (m, 1H), 2.09–2.05 (m, 1H), 1.83–1.76 (m, 1H), 1.72–1.67 (m, 1H), 1.63–1.55 (m, 1H), 1.51–1.46 (m, 1H), 0.93–0.91 (m, 2H), 0.83–0.77 (m, 2H);  $^{13}\text{C}$  NMR (150 MHz,  $\text{CDCl}_3$ )  $\delta$  134.9, 133.6, 127.7, 127.6, 126.8, 123.0, 115.5, 114.9, 99.0, 73.8, 73.7, 64.6, 43.9, 39.9, 36.9, 22.1, 19.8, 8.54, 8.49, 0.4. HRMS (ESI)  $[\text{M}+\text{Na}]^+$  Calcd. for  $[\text{C}_{20}\text{H}_{18}\text{N}_2\text{NaO}]^+$ : 325.1311, Found: 325.1314.

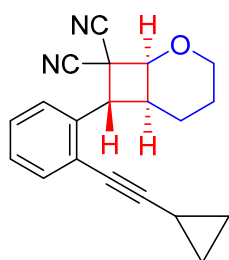

**(±)-(1*S*,6*S*,7*R*)-7-(2-(Cyclopropylethynyl)phenyl)-2-oxabicyclo**

**[4.2.0]octane-8,8-dicarbonitrile [3(za)']:** White solid. m.p. 172.5–173.5 °C.  $^1\text{H}$  NMR (600 MHz,  $\text{CDCl}_3$ )  $\delta$  7.47–7.46 (m, 1H), 7.35–7.33 (m, 1H), 7.31–7.28 (m, 1H), 4.93 (d,  $J = 11.4$  Hz, 1H), 4.57–4.56 (m, 1H), 4.16 (d,  $J = 11.4$  Hz, 1H), 3.47 (t,  $J = 12.0$  Hz, 1H), 3.16–3.12 (m, 1H), 2.00–1.92 (m, 1H), 1.83–1.76 (m, 1H), 1.71–1.69 (m, 1H), 1.64–1.60 (m, 1H), 1.59–1.56 (m, 1H), 0.97–0.89 (m, 4H);  $^{13}\text{C}$  NMR (150 MHz,  $\text{CDCl}_3$ )  $\delta$  135.2, 133.0, 128.6, 127.8, 126.5, 125.0, 113.0, 112.5, 100.7, 73.12, 73.06, 65.3, 47.2, 38.0, 33.8, 21.0, 20.4, 8.8, 8.4, 0.6. HRMS (ESI)  $[\text{M}+\text{Na}]^+$  Calcd. for  $[\text{C}_{20}\text{H}_{18}\text{N}_2\text{NaO}]^+$ : 325.1311, Found: 325.1313.

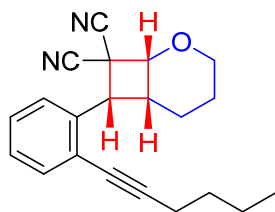

(±)-(1*R*,6*R*,7*R*)-7-(2-(Hex-1-yn-1-yl)phenyl)-2-oxabicyclo[4.2.0]octane-8,8-dicarbonitrile (**3z'a**): Light yellow oil. <sup>1</sup>H NMR (400 MHz, CDCl<sub>3</sub>) δ 7.54–7.52 (m, 1H), 7.48–7.45 (m, 1H), 7.37–7.32 (m, 1H), 7.30–7.26 (m, 1H), 4.83 (d, *J* = 7.6 Hz, 1H), 4.43 (td, *J*<sub>1</sub> = 2.8 Hz, *J*<sub>2</sub> = 11.6 Hz, 1H), 4.07 (d, *J* = 8.0 Hz, 1H), 3.90–3.86 (m, 1H), 3.43–3.34 (m, 1H), 2.45 (t, *J* = 7.2 Hz, 2H), 2.11–2.06 (m, 1H), 1.86–1.76 (m, 1H), 1.72–1.67 (m, 1H), 1.64–1.60 (m, 2H), 1.58–1.55 (m, 1H), 1.52–1.43 (m, 2H), 0.96 (t, *J* = 7.2 Hz, 3H); <sup>13</sup>C NMR (100 MHz, CDCl<sub>3</sub>) δ 134.6, 133.6, 127.8, 127.7, 126.9, 123.2, 115.5, 114.9, 96.3, 78.7, 73.8, 64.6, 43.9, 39.7, 37.0, 30.5, 22.15, 22.10, 19.9, 13.6. HRMS (ESI) [M+Na]<sup>+</sup> Calcd. for [C<sub>21</sub>H<sub>22</sub>N<sub>2</sub>NaO]<sup>+</sup>: 341.1624, Found: 341.1619.

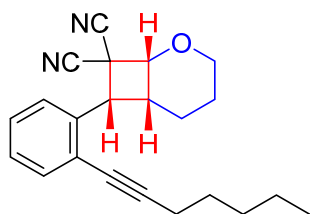

(±)-(1*R*,6*R*,7*R*)-7-(2-(Hept-1-yn-1-yl)phenyl)-2-oxabicyclo[4.2.0]octane-8,8-dicarbonitrile (**3z''a**): Light yellow oil. <sup>1</sup>H NMR (600 MHz, CDCl<sub>3</sub>) δ: 7.54–7.53 (m, 1H), 7.47–7.46 (m, 1H), 7.36–7.33 (m, 1H), 7.29–7.27 (m, 1H), 4.83 (d, *J* = 7.8 Hz, 1H), 4.44 (td, *J*<sub>1</sub> = 3.0 Hz, *J*<sub>2</sub> = 12.0 Hz, 1H), 4.07 (d, *J* = 8.4 Hz, 1H), 3.90–3.86 (m, 1H), 3.42–3.36 (m, 1H), 2.44 (t, *J* = 7.2 Hz, 2H), 2.10–2.07 (m, 1H), 1.85–1.77 (m, 1H), 1.72–1.67 (m, 1H), 1.64–1.60 (m, 2H), 1.59–1.56 (m, 1H), 1.46–1.41 (m, 2H), 1.40–1.34 (m, 2H), 0.93 (t, *J* = 7.2 Hz, 3H); <sup>13</sup>C NMR (150 MHz, CDCl<sub>3</sub>) δ: 134.7, 133.6, 127.8, 127.7, 126.9, 123.2, 115.5, 114.9, 96.4, 78.7, 73.8, 64.6, 43.9, 39.7, 36.9, 31.2, 28.1, 22.18, 22.15, 19.9, 19.7, 14.0. HRMS (ESI) [M+Na]<sup>+</sup> Calcd. for [C<sub>22</sub>H<sub>24</sub>N<sub>2</sub>NaO]<sup>+</sup>: 355.1781, Found: 355.1777.

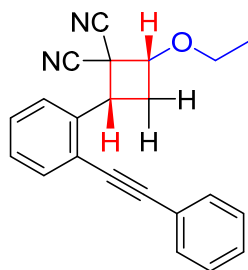

(±)-(2*R*,4*R*)-2-Ethoxy-4-(2-(phenylethynyl)phenyl)cyclobutane-1,1-dicarbonitrile (**3ab**): White solid. m.p. 171.5–176.7 °C. <sup>1</sup>H NMR (400 MHz, CDCl<sub>3</sub>) δ 7.64–7.61 (m, 3H), 7.45–7.44 (m, 2H), 7.39–7.36 (m, 4H), 4.49–4.39 (m, 2H), 3.85–3.77 (m, 1H), 3.72–3.65 (m, 1H), 2.86–2.71 (m, 2H), 1.34 (t, *J* = 7.2 Hz, 3H); <sup>13</sup>C NMR (100 MHz, CDCl<sub>3</sub>) δ 134.9, 133.2, 131.8, 131.6, 128.8, 128.7, 128.3, 127.3, 123.8, 122.6, 115.2, 111.2, 95.2, 86.4, 76.7, 66.2, 42.1, 38.4, 32.0, 14.9. HRMS (ESI) [M+Na]<sup>+</sup> Calcd. for [C<sub>22</sub>H<sub>18</sub>N<sub>2</sub>NaO]<sup>+</sup>: 349.1311, Found: 349.1310.

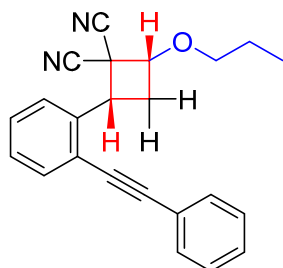

(±)-(2*R*,4*R*)-2-(2-(Phenylethynyl)phenyl)-4-propoxycyclobutane-1,1-dicarbonitrile (**3ac**): White solid. m.p. 133.8–134.2 °C. <sup>1</sup>H NMR (600 MHz, CDCl<sub>3</sub>) δ 7.63–7.62 (m, 3H), 7.444–7.437 (m, 2H), 7.38–7.36 (m, 4H), 4.47–4.44 (m, 1H), 4.42–4.38 (m, 1H), 3.73–3.69 (m, 1H), 3.58–3.54 (m, 1H), 2.85–2.79 (m, 1H), 2.76–2.71 (m, 1H), 1.75–1.69 (m, 2H), 1.00 (t, *J* = 4.8 Hz, 3H); <sup>13</sup>C NMR (150 MHz, CDCl<sub>3</sub>) δ 134.9, 133.1, 131.8, 128.74, 128.72, 128.3, 127.3, 123.8, 122.6, 115.2, 111.1, 95.2, 86.4, 76.8, 72.3, 42.0, 38.4, 31.9, 22.7, 10.4. HRMS (ESI) [M+Na]<sup>+</sup> Calcd. for [C<sub>23</sub>H<sub>20</sub>N<sub>2</sub>NaO]<sup>+</sup>: 363.1468, Found: 363.1471.

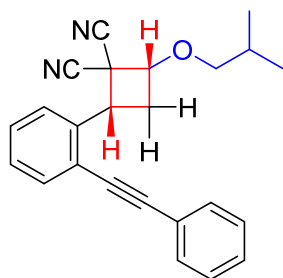

(±)-(2*R*,4*R*)-2-(*iso*-Butoxy)-4-(2-(phenylethynyl)phenyl)cyclobutane-1,1-dicarbonitrile (**3ad**): White solid. m.p. 125.8–126.4 °C. <sup>1</sup>H NMR (400 MHz, CDCl<sub>3</sub>) δ 7.64–7.61 (m, 3H), 7.44–7.43 (m, 2H), 7.38–7.35 (m, 4H), 4.44–4.36 (m, 2H), 3.54–3.50 (m, 1H), 3.37–3.33 (m, 1H), 2.88–2.67 (m, 2H), 2.05–1.92 (m, 1H), 0.98 (t, *J* = 6.4 Hz, 6H); <sup>13</sup>C NMR (100 MHz, CDCl<sub>3</sub>) δ 134.9, 133.1, 131.7, 128.69, 128.67, 128.3, 127.3, 123.8, 122.6, 115.2, 111.1, 95.2, 86.4, 77.1, 76.9, 41.8, 38.4, 31.8, 28.4, 19.14, 19.08. HRMS (ESI) [M+Na]<sup>+</sup> Calcd. for [C<sub>24</sub>H<sub>22</sub>N<sub>2</sub>NaO]<sup>+</sup>: 377.1624, Found: 377.1629.

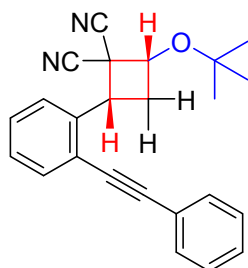

(±)-(2*R*,4*R*)-2-(*tert*-Butoxy)-4-(2-(phenylethynyl)phenyl)cyclobutane-1,1-dicarbonitrile (**3ae**): White solid. m.p. 137.6–138.9 °C. <sup>1</sup>H NMR (600 MHz, CDCl<sub>3</sub>) δ 7.64–7.62 (m, 3H), 7.48–7.43 (m, 2H), 7.38–7.36 (m, 4H), 4.64 (t, *J* = 8.4 Hz, 1H), 4.43 (dd, *J*<sub>1</sub> = 8.4 Hz, *J*<sub>2</sub> = 12.0 Hz, 1H), 2.86–2.81 (m, 1H), 2.74–2.69 (m, 1H), 1.35 (s, 9H); <sup>13</sup>C NMR (150 MHz, CDCl<sub>3</sub>) δ 135.3, 133.1, 131.8, 128.8, 128.7, 128.6, 128.3, 127.4, 123.9, 122.7, 115.3, 111.7, 95.1, 86.5, 76.5, 70.6, 45.4, 38.7, 34.1, 28.2. HRMS (ESI) [M+Na]<sup>+</sup> Calcd. for [C<sub>24</sub>H<sub>22</sub>N<sub>2</sub>NaO]<sup>+</sup>: 377.1624, Found: 377.1625.

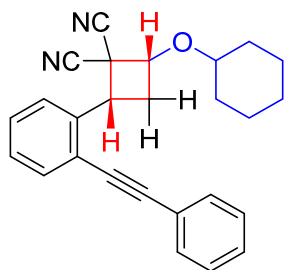

**(±)-(2*R*,4*R*)-2-(Cyclohexyloxy)-4-(2-(phenylethynyl)phenyl)cyclobutane-1,1-dicarbonitrile (3af):** White solid. m.p. 122.6–124.4 °C. <sup>1</sup>H NMR (600 MHz, CDCl<sub>3</sub>) δ 7.63–7.62 (m, 3H), 7.46–7.43 (m, 2H), 7.38–7.36 (m, 4H), 4.59 (t, *J* = 8.4 Hz, 1H), 4.39 (dd, *J*<sub>1</sub> = 8.4 Hz, *J*<sub>2</sub> = 12.0 Hz, 1H), 3.59–3.55 (m, 1H), 2.86–2.81 (m, 1H), 2.75–2.71 (m, 1H), 2.03–1.97 (m, 2H), 1.81–1.77 (m, 2H), 1.55–1.53 (m, 1H), 1.51–1.47 (m, 1H), 1.45–1.39 (m, 1H), 1.36–1.28 (m, 2H), 1.26–1.21 (m, 1H); <sup>13</sup>C NMR (150 MHz, CDCl<sub>3</sub>) δ 135.1, 133.1, 131.8, 128.75, 128.71, 128.7, 128.3, 127.4, 123.8, 122.6, 115.3, 111.5, 95.1, 86.5, 78.9, 74.9, 43.4, 38.5, 33.0, 32.8, 31.5, 25.3, 23.84, 23.81. HRMS (ESI) [M+Na]<sup>+</sup> Calcd. for [C<sub>26</sub>H<sub>24</sub>N<sub>2</sub>NaO]<sup>+</sup>: 403.1781, Found: 403.1786.

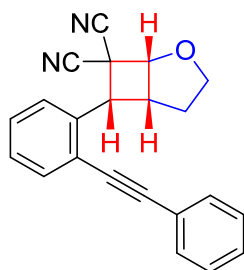

**(±)-(1*R*,5*R*,6*R*)-6-(2-(Phenylethynyl)phenyl)-2-oxabicyclo[3.2.0]heptane-7,7-dicarbonitrile (3ag):** Lightless oil. <sup>1</sup>H NMR (600 MHz, CDCl<sub>3</sub>) δ 7.64–7.62 (m, 1H), 7.53–7.50 (m, 3H), 7.44–7.42 (m, 1H), 7.39–7.35 (m, 4H), 5.06 (d, *J* = 6.6 Hz, 1H), 4.47 (d, *J* = 8.4 Hz, 1H), 4.44–4.41 (m, 1H), 4.11 (q, *J* = 8.4 Hz, 1H), 3.98–3.93 (m, 1H), 2.37–2.31 (m, 1H), 2.16–2.09 (m, 1H); <sup>13</sup>C NMR (150 MHz, CDCl<sub>3</sub>) δ 135.3, 134.0, 131.4, 128.9, 128.64, 128.56, 128.0, 127.2, 122.5, 115.3, 112.0, 95.5, 87.3, 82.1, 73.0, 45.5, 43.3, 38.5, 26.9. HRMS (ESI) [M+Na]<sup>+</sup> Calcd. for [C<sub>22</sub>H<sub>16</sub>N<sub>2</sub>NaO]<sup>+</sup>: 347.1155, Found: 347.1159.



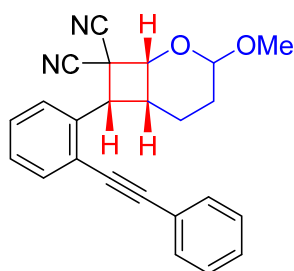

(±)-**(1*R*,6*R*,7*R*)-3-Methoxy-7-(2-(phenylethynyl)phenyl)-2-oxabicyclo[4.2.0]octane-8,8-dicarbonitrile (3ah)**: White solid. m.p. 149.4–150.3 °C. <sup>1</sup>H NMR (600 MHz, CDCl<sub>3</sub>) δ 7.62–7.60 (m, 1H), 7.54–7.52 (m, 1H), 7.43–7.42 (m, 2H), 7.38–7.35 (m, 1H), 7.31–7.27 (m, 4H), 5.07–5.05 (m, 1H), 4.85 (d, *J* = 7.2 Hz, 1H), 4.36 (d, *J* = 8.4 Hz, 1H), 3.41 (s, 3H), 3.34–3.28 (m, 1H), 2.01–1.97 (m, 1H), 1.94–1.89 (m, 1H), 1.75–1.68 (m, 1H), 1.33–1.27 (m, 1H); <sup>13</sup>C NMR (150 MHz, CDCl<sub>3</sub>) δ 134.8, 133.5, 131.4, 128.9, 128.7, 128.6, 128.0, 127.1, 122.5, 115.1, 113.5, 99.8, 94.6, 87.0, 71.8, 56.2, 44.6, 38.8, 37.4, 27.2, 17.5. HRMS (ESI) [M+Na]<sup>+</sup> Calcd. for [C<sub>24</sub>H<sub>20</sub>N<sub>2</sub>NaO<sub>2</sub>]<sup>+</sup>: 391.1417, Found: 391.1422.

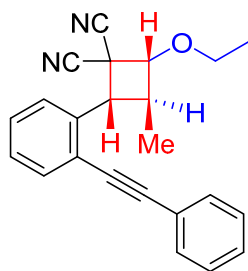

(±)-**(2*R*,3*S*,4*R*)-2-Ethoxy-3-methyl-4-(2-(phenylethynyl)phenyl)cyclobutane-1,1-dicarbonitrile (3ai)**: White solid. m.p. 139.6–140.1 °C. <sup>1</sup>H NMR (400 MHz, CDCl<sub>3</sub>) δ 7.72–7.70 (m, 1H), 7.59–7.57 (m, 1H), 7.50–7.48 (m, 2H), 7.44–7.39 (m, 1H), 7.37–7.31 (m, 4H), 4.56 (d, *J* = 7.6 Hz, 1H), 4.21 (d, *J* = 8.8 Hz, 1H), 3.89–3.81 (m, 1H), 3.74–3.66 (m, 1H), 3.61–3.48 (m, 1H), 1.35 (t, *J* = 6.8 Hz, 3H), 1.20 (d, *J* = 7.6 Hz, 3H); <sup>13</sup>C NMR (100 MHz, CDCl<sub>3</sub>) δ 134.7, 133.1, 131.3, 128.7, 128.6, 128.4, 127.7, 126.9, 122.6, 122.5, 115.5,

113.2, 94.2, 87.0, 78.4, 66.3, 42.8, 40.5, 37.3, 14.8, 9.1. HRMS (ESI)  $[M+Na]^+$   
Calcd. for  $[C_{23}H_{20}N_2NaO]^+$ : 363.1468, Found: 363.1472.

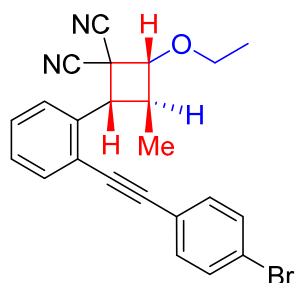

**(±)-(2*R*,3*S*,4*R*)-2-((4-Bromophenyl)ethynyl)phenyl)-4-ethoxy-3-methylcyclobutane-1,1-dicarbonitrile (3hi)**: White solid. m.p. 142.4–143.1 °C.  $^1H$  NMR (600 MHz,  $CDCl_3$ )  $\delta$  7.64–7.63 (m, 1H), 7.53–7.51 (m, 2H), 7.47–7.44 (m, 2H), 7.42–7.41 (m, 2H), 7.39–7.36 (m, 1H), 4.82 (d,  $J = 10.8$  Hz, 1H), 4.41 (d,  $J = 9.0$  Hz, 1H), 3.88–3.83 (m, 1H), 3.74–3.69 (m, 1H), 3.37–3.31 (m, 1H), 1.37 (t,  $J = 7.2$  Hz, 3H), 1.03 (d,  $J = 7.2$  Hz, 3H);  $^{13}C$  NMR (150 MHz,  $CDCl_3$ )  $\delta$  134.4, 133.3, 133.0, 128.6, 128.4, 128.0, 124.7, 123.2, 121.4, 113.9, 113.5, 94.3, 87.5, 84.3, 66.6, 44.4, 40.6, 37.5, 15.0, 13.5. HRMS (ESI)  $[M+Na]^+$  Calcd. for  $[C_{23}H_{19}^{79}BrN_2NaO]^+$ : 441.0573, Found: 441.0577; for  $[C_{23}H_{19}^{81}BrN_2NaO]^+$ : 443.0553, Found: 443.0558.

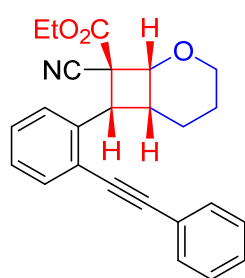

**(±)-Ethyl (1*R*,6*R*,7*R*,8*S*)-8-cyano-7-(2-(phenylethynyl)phenyl)-2-oxabicyclo[4.2.0] octane-8-carboxylate (5aa)**: White solid. m.p. 141.7–142.7 °C.  $^1H$  NMR (400 MHz,  $CDCl_3$ )  $\delta$  7.63–7.61 (m, 1H), 7.57–7.55 (m, 1H), 7.52–7.48 (m, 2H), 7.41–7.36 (m, 4H), 7.31–7.27 (m, 1H), 4.76 (d,  $J = 7.6$  Hz, 1H), 4.51 (td,  $J_1 = 3.2$  Hz,  $J_2 = 11.6$  Hz, 1H), 4.33–4.20 (m, 2H), 4.16 (d,  $J = 8.0$  Hz,

1H), 3.85–3.81 (m, 1H), 3.48–3.39 (m, 1H), 2.18–2.12 (m, 1H), 1.96–1.85 (m, 1H), 1.71–1.63 (m, 1H), 1.61–1.52 (m, 1H), 1.33 (t,  $J = 7.2$  Hz, 3H);  $^{13}\text{C}$  NMR (100 MHz,  $\text{CDCl}_3$ )  $\delta$  167.5, 137.1, 133.2, 131.3, 128.6, 128.5, 128.4, 127.4, 127.0, 122.9, 122.1, 118.6, 93.5, 87.8, 71.8, 64.2, 63.2, 51.4, 41.7, 38.6, 22.5, 20.1, 14.0. HRMS (ESI)  $[\text{M}+\text{Na}]^+$  Calcd. for  $[\text{C}_{25}\text{H}_{23}\text{NNaO}_3]^+$ : 408.1570, Found: 408.1574.

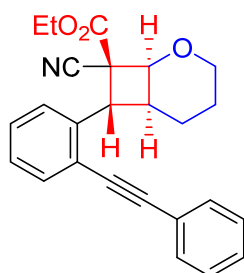

(±)-Ethyl **(1*S*,6*S*,7*R*,8*S*)-8-cyano-7-(2-(phenylethynyl)phenyl)-2-oxabicyclo[4.2.0]octane-8-carboxylate [5(aa)']**: White solid. m.p. 142.8–143.2 °C.  $^1\text{H}$  NMR (400 MHz,  $\text{CDCl}_3$ )  $\delta$  7.65–7.62 (m, 2H), 7.60–7.57 (m, 2H), 7.42–7.34 (m, 4H), 7.33–7.28 (m, 1H), 5.19 (d,  $J = 11.6$  Hz, 1H), 4.69 (d,  $J = 5.6$  Hz, 1H), 4.17–4.00 (m, 2H), 3.95–3.92 (m, 1H), 3.34 (td,  $J_1 = 3.2$  Hz,  $J_2 = 11.6$  Hz, 1H), 3.06–3.00 (m, 1H), 2.01–1.90 (m, 1H), 1.79–1.68 (m, 2H), 1.55–1.50 (m, 1H), 1.18 (t,  $J = 7.2$  Hz, 3H);  $^{13}\text{C}$  NMR (100 MHz,  $\text{CDCl}_3$ )  $\delta$  163.6, 138.1, 133.1, 131.8, 128.6, 128.4, 128.3, 127.8, 127.3, 123.9, 123.3, 117.1, 94.3, 87.8, 74.9, 65.1, 62.5, 50.9, 41.9, 35.4, 21.8, 20.8, 14.0. HRMS (ESI)  $[\text{M}+\text{Na}]^+$  Calcd. for  $[\text{C}_{25}\text{H}_{23}\text{NNaO}_3]^+$ : 408.1570, Found: 408.1574.

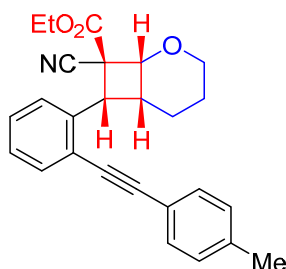

(±)-Ethyl **(1*R*,6*R*,7*R*,8*S*)-8-cyano-7-(2-(p-tolyethynyl)phenyl)-2-oxabicyclo[4.2.0]octane-8-carboxylate (5ba)**: White solid. m.p. 122.3–123.0

°C.  $^1\text{H}$  NMR (600 MHz,  $\text{CDCl}_3$ )  $\delta$  7.61–7.60 (m, 1H), 7.56–7.54 (m, 1H), 7.40–7.36 (m, 3H), 7.29–7.27 (m, 1H), 7.19–7.18 (m, 2H), 4.76 (d,  $J = 7.8$  Hz, 1H), 4.50 (td,  $J_1 = 3.0$  Hz,  $J_2 = 12.0$  Hz, 1H), 4.32–4.23 (m, 2H), 4.15 (d,  $J = 7.8$  Hz, 1H), 3.84–3.82 (m, 1H), 3.46–3.40 (m, 1H), 2.39 (s, 3H), 2.16–2.13 (m, 1H), 1.93–1.86 (m, 1H), 1.69–1.65 (m, 1H), 1.61–1.53 (m, 1H), 1.34 (t,  $J = 7.2$  Hz, 3H);  $^{13}\text{C}$  NMR (150 MHz,  $\text{CDCl}_3$ )  $\delta$  167.6, 138.9, 137.1, 133.1, 131.2, 129.3, 128.3, 127.3, 127.0, 122.4, 119.9, 118.6, 93.8, 87.2, 71.8, 64.3, 63.2, 51.4, 41.8, 38.7, 22.6, 21.5, 20.1, 14.0. HRMS (ESI)  $[\text{M}+\text{Na}]^+$  Calcd. for  $[\text{C}_{26}\text{H}_{25}\text{NNaO}_3]^+$ : 422.1727, Found: 422.1731.

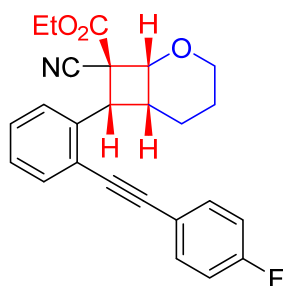

(±)-Ethyl (1*R*,6*R*,7*R*,8*S*)-8-cyano-7-(2-((4-fluorophenyl)ethynyl)phenyl)-2-oxabicyclo [4.2.0]octane-8-carboxylate (**5ca**): White solid. m.p. 142.8–142.3 °C.  $^1\text{H}$  NMR (400 MHz,  $\text{CDCl}_3$ )  $\delta$  7.63–7.61 (m, 1H), 7.56–7.54 (m, 1H), 7.51–7.46 (m, 2H), 7.41–7.37 (m, 1H), 7.31–7.27 (m, 1H), 7.11–7.05 (m, 2H), 4.75 (d,  $J = 7.6$  Hz, 1H), 4.51 (td,  $J_1 = 3.2$  Hz,  $J_2 = 11.6$  Hz, 1H), 4.33–4.20 (m, 2H), 4.16 (d,  $J = 8.0$  Hz, 1H), 3.85–3.81 (m, 1H), 3.43–3.34 (m, 1H), 2.16–2.10 (m, 1H), 1.94–1.86 (m, 1H), 1.70–1.68 (m, 1H), 1.63–1.52 (m, 1H), 1.34 (t,  $J = 7.2$  Hz, 3H);  $^{19}\text{F}$  NMR (376 MHz,  $\text{CDCl}_3$ )  $\delta$  -110.1;  $^{13}\text{C}$  NMR (100 MHz,  $\text{CDCl}_3$ )  $\delta$  167.5, 162.6 (d,  $J = 248.9$  Hz), 137.1, 133.2 (d,  $J = 7.1$  Hz), 128.5, 127.4, 127.1, 122.0, 119.0 (d,  $J = 3.5$  Hz), 118.5, 115.8 (d,  $J = 22.2$  Hz), 92.5, 87.5, 71.8, 64.2, 63.2, 51.5, 41.6, 38.6, 22.5, 20.1, 14.0. HRMS (ESI)  $[\text{M}+\text{Na}]^+$  Calcd. for  $[\text{C}_{25}\text{H}_{22}\text{FNNaO}_3]^+$ : 426.1476, Found: 426.1481.

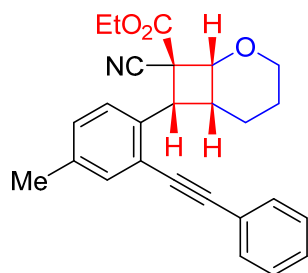

(±)-Ethyl (1*R*,6*R*,7*R*,8*S*)-8-cyano-7-(4-methyl-2-(phenylethynyl)phenyl)-2-oxabicyclo [4.2.0]octane-8-carboxylate (**5da**): White solid. m.p. 142.5–143.2 °C. <sup>1</sup>H NMR (600 MHz, CDCl<sub>3</sub>) δ 7.51–7.48 (m, 3H), 7.39–7.36 (m, 4H), 7.20–7.19 (m, 1H), 4.75 (d, *J* = 7.8 Hz, 1H), 4.50 (td, *J*<sub>1</sub> = 3.0 Hz, *J*<sub>2</sub> = 12.0 Hz, 1H), 4.31–4.21 (m, 2H), 4.12 (d, *J* = 7.8 Hz, 1H), 3.84–3.81 (m, 1H), 3.43–3.37 (m, 1H), 2.34 (s, 3H), 2.16–2.12 (m, 1H), 1.95–1.88 (m, 1H), 1.69–1.66 (m, 1H), 1.60–1.54 (m, 1H), 1.33 (t, *J* = 7.2 Hz, 1H); <sup>13</sup>C NMR (150 MHz, CDCl<sub>3</sub>) δ 167.6, 136.8, 134.1, 133.7, 131.3, 129.3, 128.53, 128.49, 127.3, 123.0, 121.9, 118.7, 93.1, 88.0, 71.8, 64.2, 63.2, 51.5, 41.5, 38.6, 22.6, 20.7, 20.3, 20.1, 14.0. HRMS (ESI) [M+Na]<sup>+</sup> Calcd. for [C<sub>26</sub>H<sub>25</sub>NNaO<sub>3</sub>]<sup>+</sup>: 422.1727, Found: 422.1730.

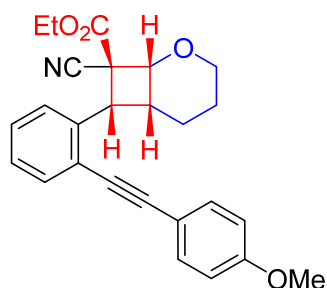

(±)-Ethyl (1*R*,6*R*,7*R*,8*S*)-8-cyano-7-(2-((4-methoxyphenyl)ethynyl)phenyl)-2-oxabicyclo[4.2.0] octane-8-carboxylate (**5ea**): White solid. m.p. 141.4–142.5 °C. <sup>1</sup>H NMR (600 MHz, CDCl<sub>3</sub>) δ 7.61–7.60 (m, 1H), 7.55–7.52 (m, 1H), 7.45–7.42 (m, 2H), 7.38–7.35 (m, 1H), 7.29–7.27 (m, 1H), 6.92–6.89 (m, 2H), 4.76 (d, *J* = 7.8 Hz, 1H), 4.51 (td, *J*<sub>1</sub> = 3.0 Hz, *J*<sub>2</sub> = 12.0 Hz, 1H), 4.32–4.22 (m, 2H), 4.15 (d, *J* = 7.8 Hz, 1H), 3.85 (s, 3H), 3.83–3.82 (m, 1H), 3.45–3.39 (m, 1H), 2.16–2.13 (m, 1H), 1.94–1.87 (m, 1H), 1.72–1.66 (m, 1H), 1.62–1.58 (m, 1H), 1.34 (t, *J* = 7.2 Hz, 3H); <sup>13</sup>C NMR (150 MHz, CDCl<sub>3</sub>) δ 167.6, 159.9,

137.0, 133.1, 132.8, 128.1, 127.3, 127.0, 122.5, 118.7, 115.1, 114.2, 93.6, 86.6, 71.8, 64.3, 63.3, 55.4, 51.5, 41.8, 38.7, 22.6, 20.1, 14.0. HRMS (ESI)  $[M+Na]^+$  Calcd. for  $[C_{26}H_{25}NNaO_4]^+$ : 438.1676, Found: 438.1680.

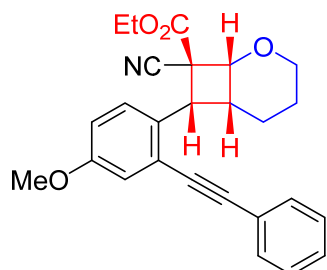

(±)-Ethyl (*1R,6R,7R,8S*)-8-cyano-7-(4-methoxy-2-(phenylethynyl)phenyl)-2-oxabicyclo[4.2.0] octane-8-carboxylate (**5fa**): White solid. m.p. 143.5–144.3 °C.  $^1H$  NMR (400 MHz,  $CDCl_3$ )  $\delta$  7.56–7.53 (m, 1H), 7.51–7.48 (m, 2H), 7.39–7.37 (m, 3H), 7.10–7.09 (m, 1H), 6.95–6.92 (m, 1H), 4.74 (d,  $J = 7.6$  Hz, 1H), 4.49 (td,  $J_1 = 2.8$  Hz,  $J_2 = 11.6$  Hz, 1H), 4.32–4.19 (m, 2H), 4.14–4.11 (m, 1H), 3.83 (s, 3H), 3.81–3.79 (m, 1H), 3.42–3.32 (m, 1H), 2.15–2.09 (m, 1H), 1.99–1.88 (m, 1H), 1.74–1.62 (m, 1H), 1.59–1.54 (m, 1H), 1.33 (t,  $J = 7.2$  Hz, 3H);  $^{13}C$  NMR (100 MHz,  $CDCl_3$ )  $\delta$  167.6, 158.3, 131.3, 129.3, 128.7, 128.55, 128.52, 123.3, 122.8, 118.7, 118.2, 114.6, 93.3, 87.8, 71.8, 64.2, 63.2, 55.4, 51.6, 41.2, 38.6, 22.6, 20.0, 14.0. HRMS (ESI)  $[M+Na]^+$  Calcd. for  $[C_{26}H_{25}NNaO_4]^+$ : 438.1676, Found: 438.1680.

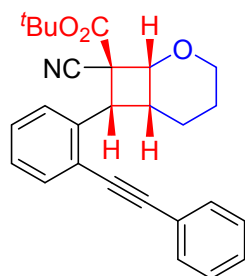

(±)-*tert*-Butyl (*1R,6R,7R,8S*)-8-cyano-7-(2-(phenylethynyl)phenyl)-2-oxabicyclo[4.2.0] octane-8-carboxylate (**5ga**): White solid. m.p. 139.2–140.5 °C.  $^1H$  NMR (400 MHz,  $CDCl_3$ )  $\delta$  7.68–7.66 (m, 1H), 7.57–7.55 (m, 1H), 7.50–

7.48 (m, 2H), 7.41–7.36 (m, 4H), 7.31–7.27 (m, 1H), 4.74 (d,  $J = 7.6$  Hz, 1H), 4.49 (td,  $J_1 = 3.2$  Hz,  $J_2 = 11.6$  Hz, 1H), 4.08 (d,  $J = 8.0$  Hz, 1H), 3.83–3.80 (m, 1H), 3.47–3.38 (m, 1H), 2.15–2.10 (m, 1H), 1.92–1.81 (m, 1H), 1.68–1.63 (m, 1H), 1.62–1.57 (m, 1H), 1.53 (s, 9H);  $^{13}\text{C}$  NMR (100 MHz,  $\text{CDCl}_3$ )  $\delta$  166.4, 137.4, 133.1, 131.2, 128.6, 128.50, 128.46, 127.3, 126.9, 123.0, 122.1, 118.8, 93.4, 87.9, 84.3, 71.2, 64.1, 52.1, 41.9, 38.5, 27.8, 22.6, 19.9. HRMS (ESI)  $[\text{M}+\text{Na}]^+$  Calcd. for  $[\text{C}_{27}\text{H}_{27}\text{NNaO}_3]^+$ : 436.1883, Found: 436.1886.

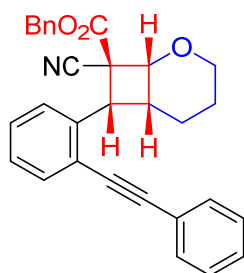

(±)-Benzyl (1*R*,6*R*,7*R*,8*S*)-8-cyano-7-(2-(phenylethynyl)phenyl)-2-oxabicyclo[4.2.0] octane-8-carboxylate (**5ha**): White solid. m.p. 150.3–150.9 °C.  $^1\text{H}$  NMR (400 MHz,  $\text{CDCl}_3$ )  $\delta$  7.54–7.52 (m, 1H), 7.48–7.46 (m, 4H), 7.43–7.39 (m, 2H), 7.37–7.32 (m, 5H), 7.27–7.23 (m, 2H), 5.57 (s, 1H), 5.31–5.25 (m, 2H), 4.69 (d,  $J = 6.0$  Hz, 1H), 3.75–3.66 (m, 2H), 2.45–2.42 (m, 1H), 1.61–1.54 (m, 1H), 1.50–1.46 (m, 1H), 1.17–1.06 (m, 1H);  $^{13}\text{C}$  NMR (100 MHz,  $\text{CDCl}_3$ )  $\delta$  164.8, 138.9, 135.5, 132.6, 131.4, 128.7, 128.6, 128.5, 128.4, 128.2, 127.9, 127.2, 122.9, 122.6, 118.3, 101.0, 94.0, 86.9, 70.1, 63.1, 62.0, 39.5, 35.4, 24.2, 18.5. HRMS (ESI)  $[\text{M}+\text{Na}]^+$  Calcd. for  $[\text{C}_{30}\text{H}_{25}\text{NNaO}_3]^+$ : 470.1727, Found: 470.1726.

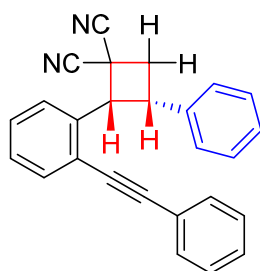

**(±)-(2*R*,3*S*)-3-Phenyl-2-(2-(phenylethynyl)phenyl)cyclobutane-1,1-dicarbonitrile (7aa)**: White solid. m.p. 169.6–170.1 °C. <sup>1</sup>H NMR (400 MHz, CDCl<sub>3</sub>) δ 7.66–7.63 (m, 2H), 7.60–7.57 (m, 1H), 7.43–7.38 (m, 3H), 7.28–7.18 (m, 4H), 7.06–7.02 (m, 1H), 6.99–6.97 (m, 2H), 6.88–6.86 (m, 1H), 5.43 (dd, *J*<sub>1</sub> = 2.8 Hz, *J*<sub>2</sub> = 9.6 Hz, 1H), 4.75 (q, *J* = 9.6 Hz, 1H), 3.44–3.30 (m, 2H); <sup>13</sup>C NMR (100 MHz, CDCl<sub>3</sub>) δ 136.9, 134.3, 132.8, 131.7, 128.8, 128.6, 128.5, 128.3, 128.2, 127.9, 127.1, 126.5, 124.9, 122.5, 116.9, 113.5, 95.9, 86.4, 52.2, 39.3, 35.7, 29.7. HRMS (ESI) [M+Na]<sup>+</sup> Calcd. for [C<sub>26</sub>H<sub>18</sub>N<sub>2</sub>Na]<sup>+</sup>: 381.1362, Found: 381.1366.

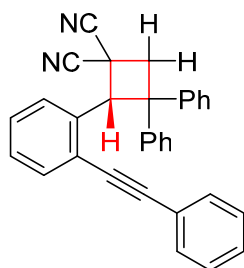

**(±)-(S)-3,3-Diphenyl-2-(2-(phenylethynyl)phenyl)cyclobutane-1,1-dicarbonitrile (7ab)**: White solid. m.p. 194.9–196.1 °C. <sup>1</sup>H NMR (600 MHz, CDCl<sub>3</sub>) δ 7.67–7.65 (m, 1H), 7.62–7.60 (m, 2H), 7.42–7.41 (m, 2H), 7.39–7.38 (m, 3H), 7.29–7.26 (m, 3H), 7.21–7.15 (m, 4H), 7.05–7.01 (m, 3H), 6.57 (d, *J* = 7.8 Hz, 1H), 6.12 (s, 1H), 4.12 (d, *J* = 13.2 Hz, 1H), 3.52 (d, *J* = 13.2 Hz, 1H); <sup>13</sup>C NMR (150 MHz, CDCl<sub>3</sub>) δ 148.7, 139.7, 134.1, 132.6, 131.7, 130.3, 128.95, 128.88, 128.7, 128.5, 128.3, 128.0, 127.8, 127.2, 126.9, 125.6, 124.7, 122.5, 116.0, 114.3, 95.6, 86.9, 55.0, 54.4, 41.0, 29.7. HRMS (ESI) [M+Na]<sup>+</sup> Calcd. for [C<sub>32</sub>H<sub>22</sub>N<sub>2</sub>Na]<sup>+</sup>: 457.1675, Found: 457.1672.



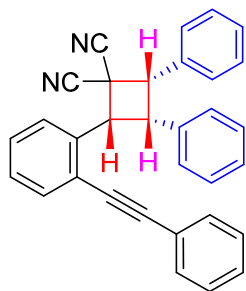

(±)-**(2*S*,3*S*,4*R*)-2,3-Diphenyl-4-(2-(phenylethynyl)phenyl)cyclobutane-1,1-dicarbonitrile (7ac)**: White solid. m.p. 183.6–184.3 °C. <sup>1</sup>H NMR (400 MHz, CDCl<sub>3</sub>) δ 7.53–7.50 (m, 3H), 7.39–7.35 (m, 3H), 7.30–7.26 (m, 4H), 7.23–7.22 (m, 2H), 7.20–7.15 (m, 1H), 7.13–7.09 (m, 2H), 7.04–6.97 (m, 4H), 5.31 (d, *J* = 9.2 Hz, 1H), 4.94–4.84 (m, 2H); <sup>13</sup>C NMR (100 MHz, CDCl<sub>3</sub>) δ 134.6, 133.6, 133.1, 132.6, 131.5, 130.7, 128.8, 128.49, 128.46, 128.43, 128.2, 128.02, 127.97, 127.4, 127.1, 123.2, 122.7, 116.1, 114.0, 94.9, 87.1, 49.9, 49.8, 47.7, 37.8. HRMS (ESI) [M+Na]<sup>+</sup> Calcd. for [C<sub>32</sub>H<sub>22</sub>N<sub>2</sub>Na]<sup>+</sup>: 457.1675, Found: 457.1677.

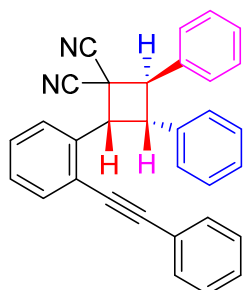

(±)-**(2*S*,3*R*,4*R*)-2,3-Diphenyl-4-(2-(phenylethynyl)phenyl)cyclobutane-1,1-dicarbonitrile (7ad)**: White solid. m.p. 195.3–197.2 °C. <sup>1</sup>H NMR (600 MHz, CDCl<sub>3</sub>) δ 7.67–7.63 (m, 3H), 7.50–7.46 (m, 4H), 7.45–7.42 (m, 1H), 7.40–7.35 (m, 3H), 7.25–7.18 (m, 4H), 7.10–7.07 (m, 1H), 7.01–6.99 (m, 3H), 5.40 (d, *J* = 9.6 Hz, 1H), 5.10–5.06 (m, 1H), 4.86 (d, *J* = 12.6 Hz, 1H); <sup>13</sup>C NMR (150 MHz, CDCl<sub>3</sub>) δ 136.7, 134.7, 134.3, 133.0, 131.7, 129.32, 129.25, 128.8, 128.7, 128.5, 128.3, 128.1, 128.0, 127.2, 127.1, 126.5, 125.5, 122.4, 114.8, 113.3, 96.4, 86.4,

51.6, 49.6, 42.3, 37.9. HRMS (ESI)  $[M+Na]^+$  Calcd. for  $[C_{32}H_{22}N_2Na]^+$ : 457.1675, Found: 457.1678.

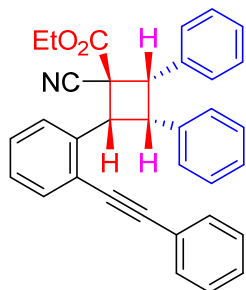

(±)-Ethyl **(1*S*,2*S*,3*S*,4*R*)-1-cyano-2,3-diphenyl-4-(2-phenylethynyl)phenylcyclobutane-1-carboxylate (7bc)**: White solid. m.p. 179.6–179.9 °C.  $^1H$  NMR (400 MHz,  $CDCl_3$ )  $\delta$  7.55–7.51 (m, 2H), 7.47–7.45 (m, 1H), 7.40–7.35 (m, 3H), 7.30–7.27 (m, 1H), 7.22–7.20 (m, 3H), 7.18–7.11 (m, 3H), 7.09–7.04 (m, 3H), 7.01–6.99 (m, 2H), 5.28–5.22 (m, 1H), 4.91–4.81 (m, 2H), 4.36–4.23 (m, 2H), 1.30 (t,  $J = 7.2$  Hz, 3H);  $^{13}C$  NMR (100 MHz,  $CDCl_3$ )  $\delta$  168.3, 136.6, 135.2, 134.7, 132.6, 131.5, 131.0, 128.5, 128.4, 128.2, 128.1, 128.0, 127.7, 127.24, 127.15, 126.7, 123.1, 123.0, 117.7, 94.2, 87.8, 63.5, 52.4, 48.8, 46.6, 45.8, 14.0. HRMS (ESI)  $[M+Na]^+$  Calcd. for  $[C_{34}H_{27}NNaO_2]^+$ : 504.1934, Found: 504.1935.

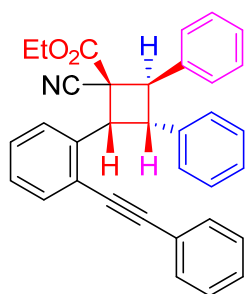

(±)-Ethyl **(1*S*,2*R*,3*S*,4*R*)-1-cyano-2,3-diphenyl-4-(2-phenylethynyl)phenylcyclobutane-1-carboxylate (7bd)**: White solid. m.p. 185.2–185.9 °C.  $^1H$  NMR (400 MHz,  $CDCl_3$ )  $\delta$  7.58–7.55 (m, 3H), 7.42–7.40

(m, 2H), 7.39–7.32 (m, 6H), 7.21–7.14 (m, 4H), 7.09–7.03 (m, 2H), 7.00–6.98 (m, 2H), 5.51 (d,  $J = 10.0$  Hz, 1H), 5.17 (t,  $J = 11.2$  Hz, 1H), 4.92 (d,  $J = 12.0$  Hz, 1H), 3.88–3.75 (m, 2H), 0.77 (t,  $J = 7.2$  Hz, 3H);  $^{13}\text{C}$  NMR (100 MHz,  $\text{CDCl}_3$ )  $\delta$  166.5, 138.3, 137.2, 135.7, 132.3, 131.5, 128.6, 128.44, 128.36, 128.30, 128.27, 127.9, 127.4, 127.3, 126.6, 124.9, 122.9, 117.4, 95.1, 87.4, 62.6, 51.8, 50.2, 45.3, 41.0, 13.4. HRMS (ESI)  $[\text{M}+\text{Na}]^+$  Calcd. for  $[\text{C}_{34}\text{H}_{27}\text{NNaO}_2]^+$ : 504.1934, Found: 504.1938.

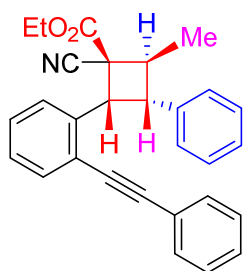

(±)-Ethyl **(1*S*,2*R*,3*R*,4*R*)-1-cyano-2-methyl-3-phenyl-4-(2-phenylethynyl)phenylcyclobutane-1-carboxylate (7be)**: White solid. m.p. 173.5–184.2 °C.  $^1\text{H}$  NMR (400 MHz,  $\text{CDCl}_3$ )  $\delta$  7.59–7.57 (m, 2H), 7.51–7.49 (m, 1H), 7.40–7.32 (m, 3H), 7.22–7.18 (m, 2H), 7.14–7.10 (m, 2H), 7.04–6.98 (m, 4H), 5.45 (d,  $J = 10.0$  Hz, 1H), 4.40–4.32 (m, 1H), 4.31–4.19 (m, 2H), 3.83–3.75 (m, 1H), 1.40 (d,  $J = 6.8$  Hz, 3H), 1.29 (t,  $J = 7.2$  Hz, 3H);  $^{13}\text{C}$  NMR (100 MHz,  $\text{CDCl}_3$ )  $\delta$  167.4, 138.4, 137.2, 132.1, 128.5, 128.4, 128.30, 128.28, 127.7, 127.1, 126.4, 126.3, 124.6, 123.0, 117.4, 94.7, 87.4, 62.8, 47.9, 45.7, 43.3, 16.3, 14.1. HRMS (ESI)  $[\text{M}+\text{Na}]^+$  Calcd. for  $[\text{C}_{29}\text{H}_{25}\text{NNaO}_2]^+$ : 442.1778, Found: 442.1777.

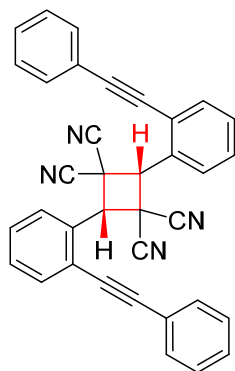

**(±)-(2*S*,4*S*)-2,4-Bis(2-(phenylethynyl)phenyl)cyclobutane-1,1,3,3-**

**tetracarbonitrile (8aa):** White solid. m.p. 212.5–212.9 °C. <sup>1</sup>H NMR (400 MHz, CDCl<sub>3</sub>) δ 8.21–8.19 (m, 2H), 7.79–7.75 (m, 2H), 7.60–7.57 (m, 8H), 7.40–7.36 (m, 2H), 7.34–7.30 (m, 4H), 5.64 (s, 2H); <sup>13</sup>C NMR (100 MHz, CDCl<sub>3</sub>) δ 134.0, 131.8, 130.9, 129.28, 129.26, 128.7, 128.5, 127.6, 124.9, 121.8, 113.2, 110.4, 97.5, 85.3, 50.9, 38.8. HRMS (ESI) [M+Na]<sup>+</sup> Calcd. for [C<sub>36</sub>H<sub>20</sub>N<sub>4</sub>Na]<sup>+</sup>: 531.1580, Found: 531.1585.

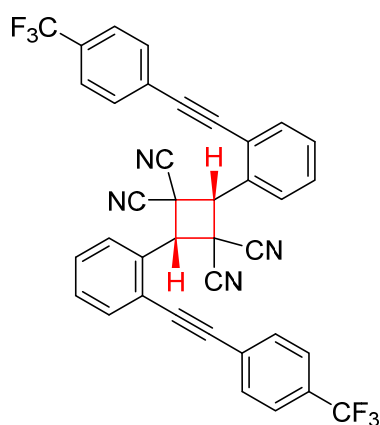

**(±)-(2*S*,4*S*)-2,4-Bis(2-((4-(trifluoromethyl)phenyl)ethynyl)phenyl)**

**cyclobutane-1,1,3,3-tetracarbonitrile (8ii):** White solid. m.p. 203.6–204.9 °C. <sup>1</sup>H NMR (400 MHz, CDCl<sub>3</sub>) δ 8.13–8.11 (m, 2H), 7.83–7.81 (m, 2H), 7.76–7.74 (m, 4H), 7.70–7.68 (m, 4H), 7.65–7.55 (m, 4H), 5.82 (s, 2H); <sup>19</sup>F NMR (376 MHz, CDCl<sub>3</sub>) δ –63.0; <sup>13</sup>C NMR (100 MHz, CDCl<sub>3</sub>) δ 134.4, 133.9, 132.14, 132.11, 131.3, 129.9, 129.8, 129.3 (q, *J* = 112.6 Hz), 125.6 (q, *J* = 3.7

Hz), 124.6 (q,  $J = 145.5$  Hz), 124.4, 111.8, 96.0, 87.0, 52.0, 37.1. HRMS (ESI)  $[M+Na]^+$  Calcd. for  $[C_{38}H_{18}F_6N_4Na]^+$ : 667.1328, Found: 667.1328.

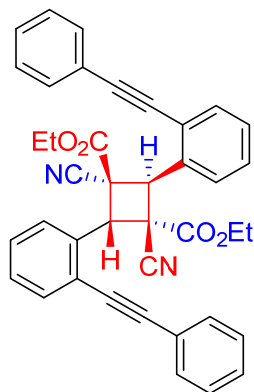

(±)-Diethyl **(1*R*,2*R*,3*S*,4*S*)-1,3-dicyano-2,4-bis(2-(phenylethynyl)phenyl)cyclobutane-1,3-dicarboxylate (9aa)**: White solid. m.p. 191.4–192.8 °C.  $^1H$  NMR (600 MHz,  $CDCl_3$ )  $\delta$  7.88–7.87 (m, 2H), 7.76–7.75 (m, 4H), 7.66–7.65 (m, 2H), 7.44–7.37 (m, 10H), 6.31 (s, 2H), 4.00–3.91 (m, 4H), 0.88 (t,  $J = 7.2$  Hz, 6H);  $^{13}C$  NMR (150 MHz,  $CDCl_3$ )  $\delta$  165.1, 133.3, 132.6, 131.9, 129.2, 128.8, 128.5, 128.3, 127.6, 125.4, 122.7, 116.6, 95.9, 86.3, 63.7, 49.1, 47.5, 13.4. HRMS (ESI)  $[M+Na]^+$  Calcd. for  $[C_{40}H_{30}N_2NaO_4]^+$ : 625.2098, Found: 625.2100.

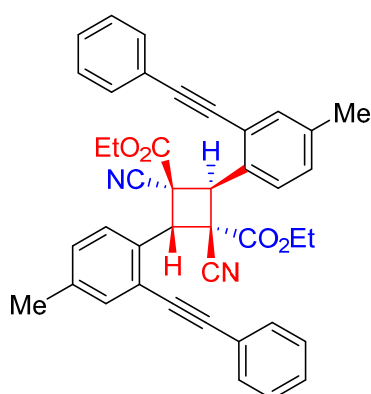

(±)-Diethyl **(1*R*,2*R*,3*S*,4*S*)-1,3-dicyano-2,4-bis(4-methyl-2-(phenylethynyl)phenyl)cyclobutane-1,3-dicarboxylate (9dd)**: White solid. m.p. 191.8–192.3 °C.  $^1H$  NMR (400 MHz,  $CDCl_3$ )  $\delta$  7.75–7.73 (m, 6H), 7.472–

7.469 (m, 2H), 7.44–7.38 (m, 6H), 7.20–7.17 (m, 2H), 6.23 (s, 2H), 4.01–3.92 (m, 4H), 2.36 (s, 6H), 0.90 (t,  $J = 7.2$  Hz, 6H);  $^{13}\text{C}$  NMR (100 MHz,  $\text{CDCl}_3$ )  $\delta$  165.2, 139.3, 133.0, 131.9, 130.4, 129.2, 128.7, 128.5, 127.5, 125.2, 122.8, 116.8, 95.3, 86.5, 63.6, 49.3, 47.3, 21.0, 13.4. HRMS (ESI)  $[\text{M}+\text{Na}]^+$  Calcd. for  $[\text{C}_{42}\text{H}_{34}\text{N}_2\text{NaO}_4]^+$ : 653.2411, Found: 653.2412.

## 9. $^1\text{H}$ NMR, $^{13}\text{C}$ NMR and $^{19}\text{F}$ NMR spectra of the products

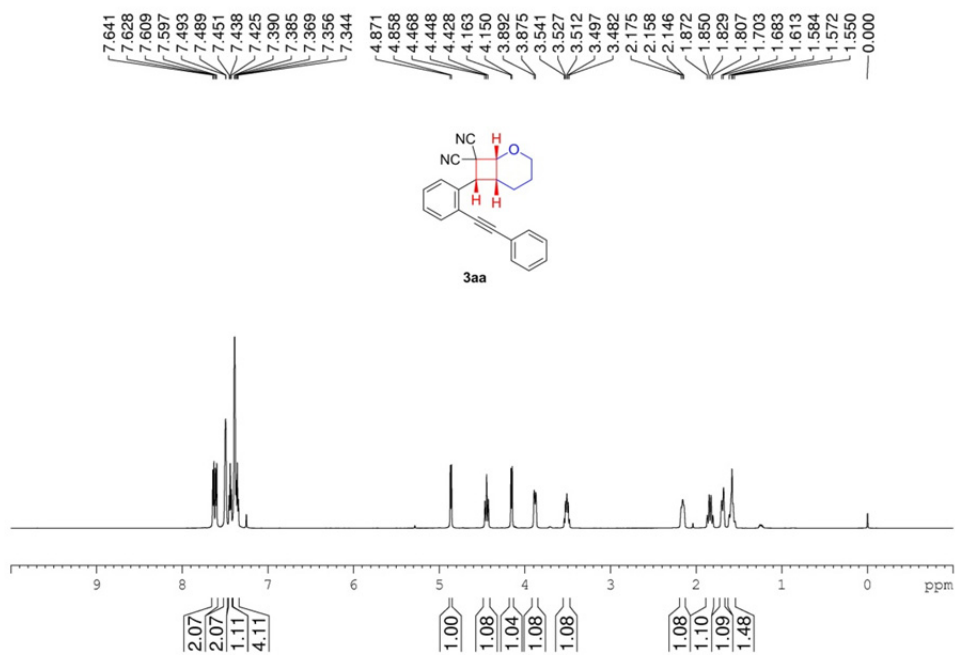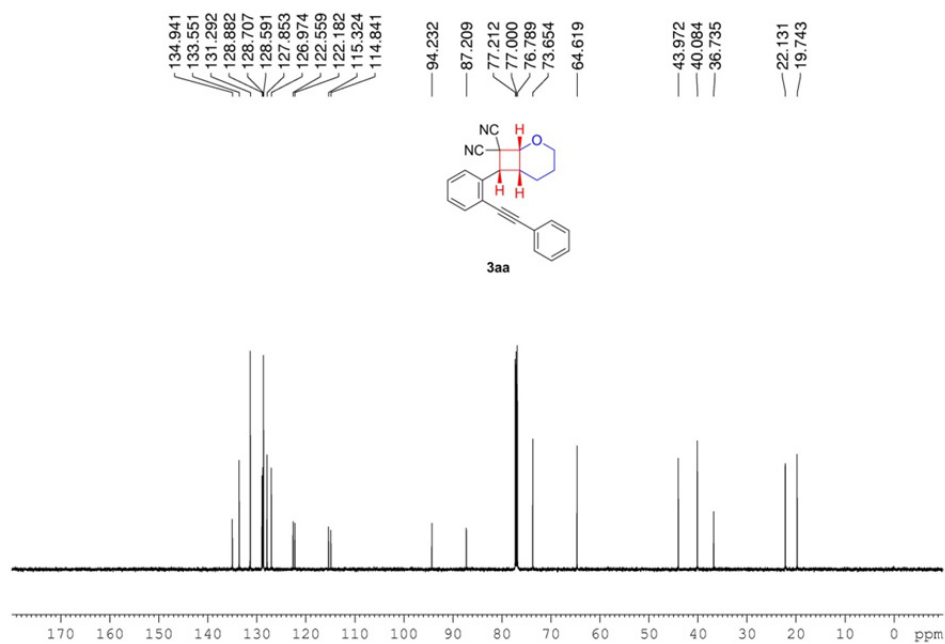

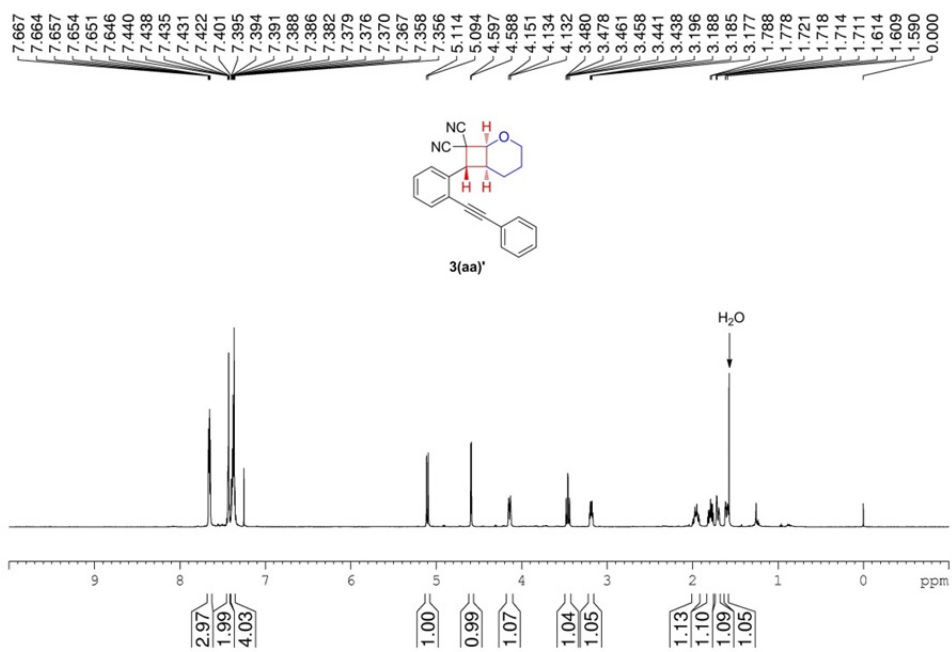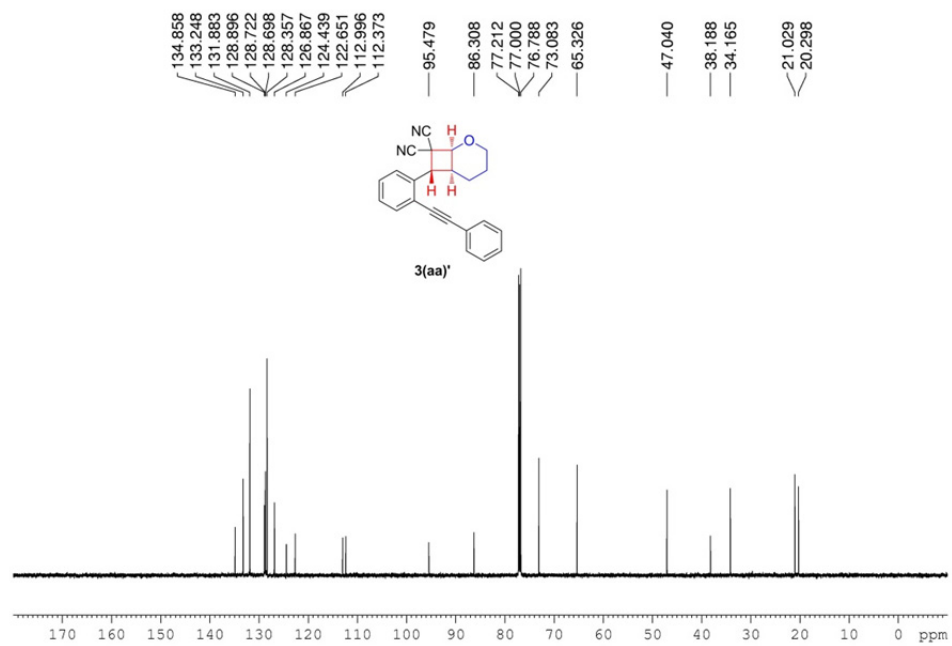



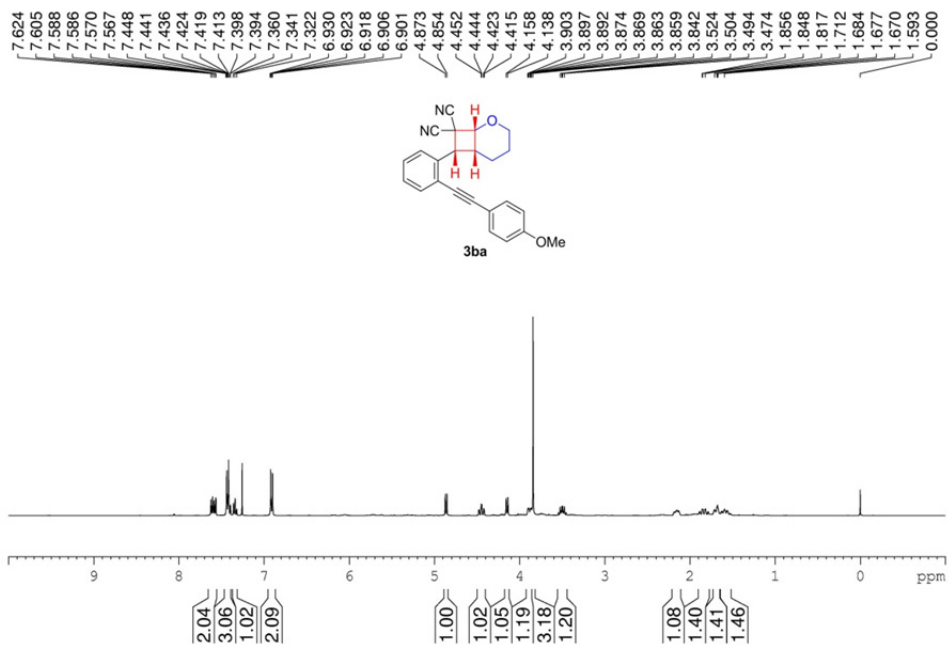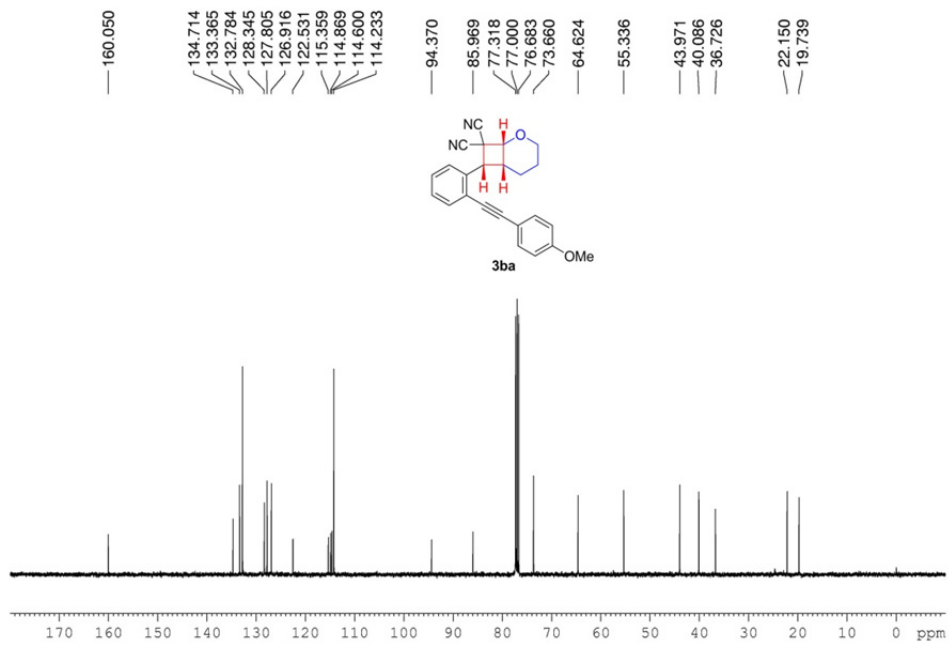

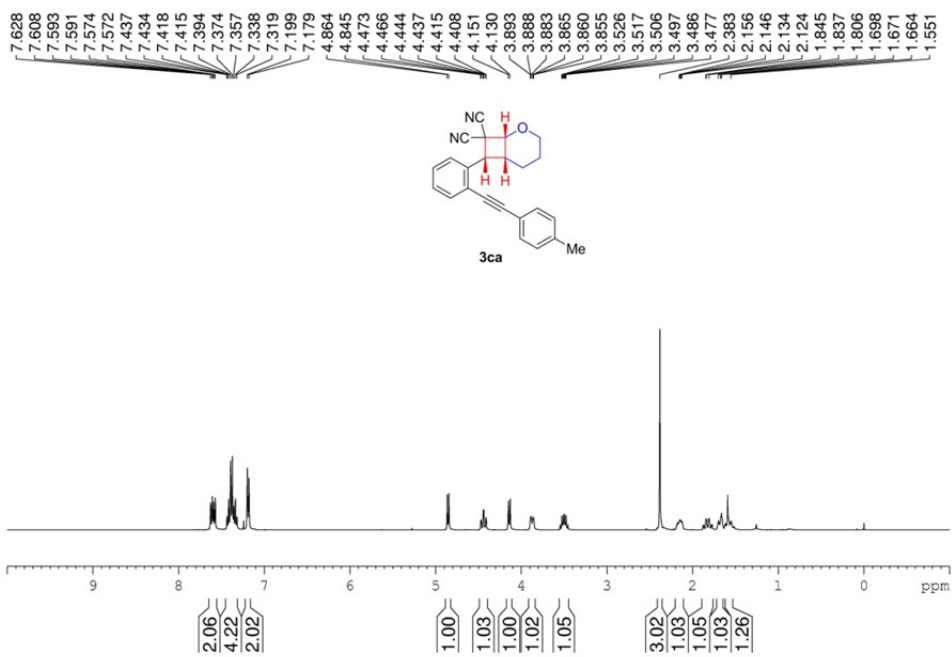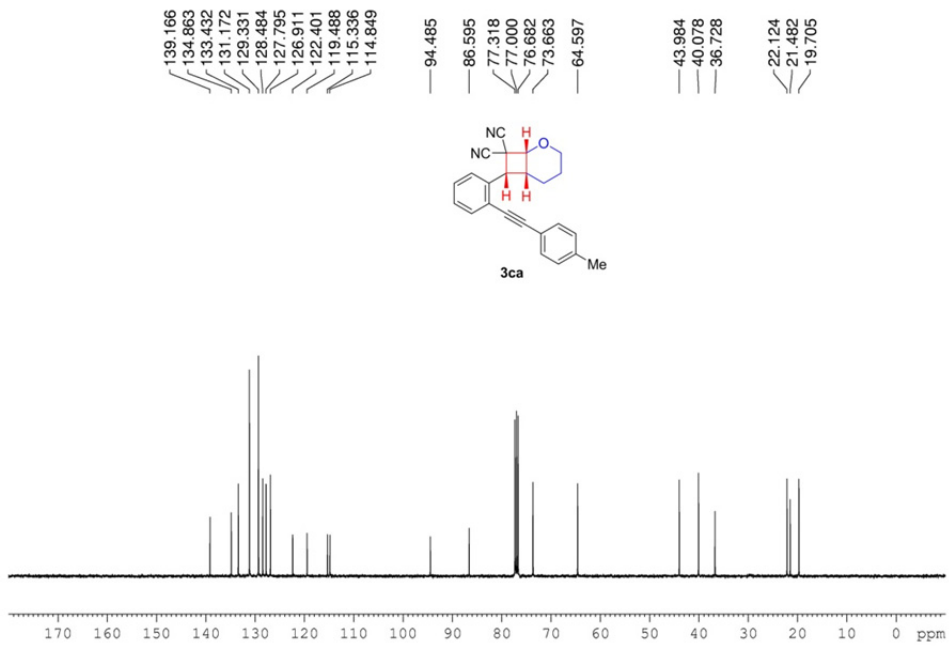

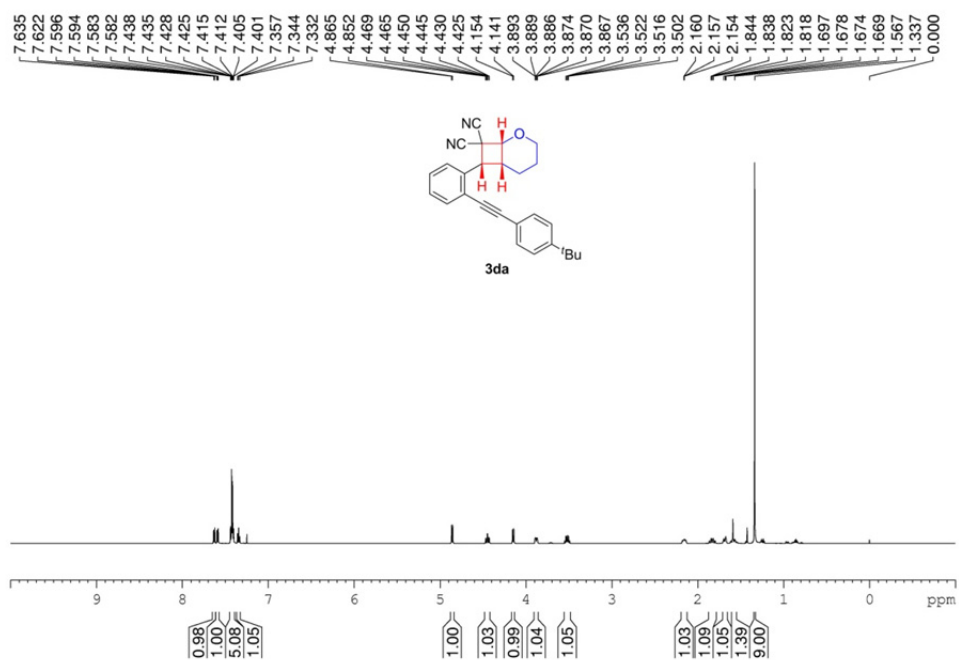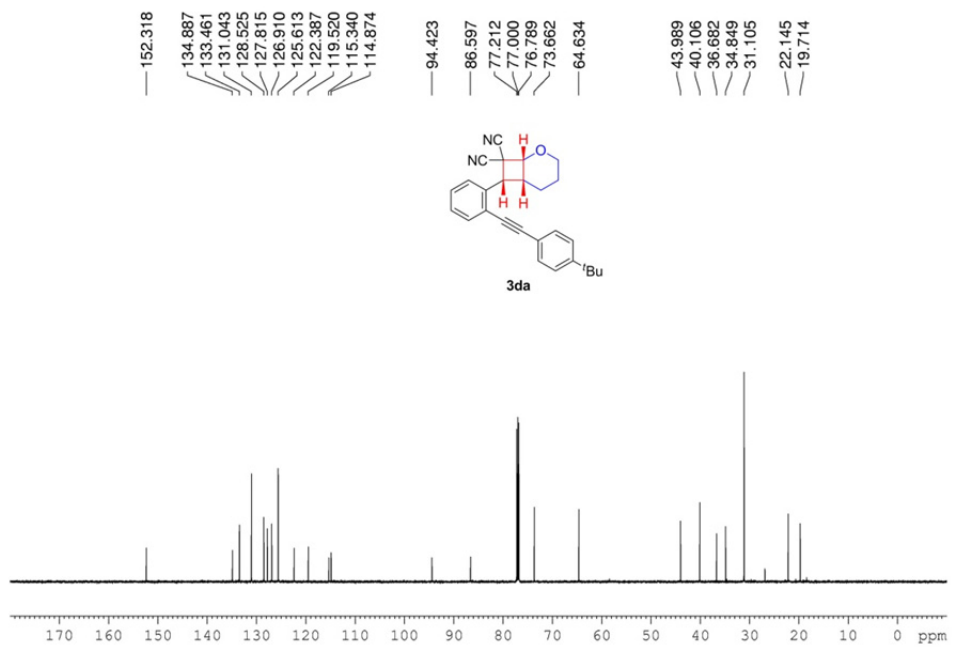

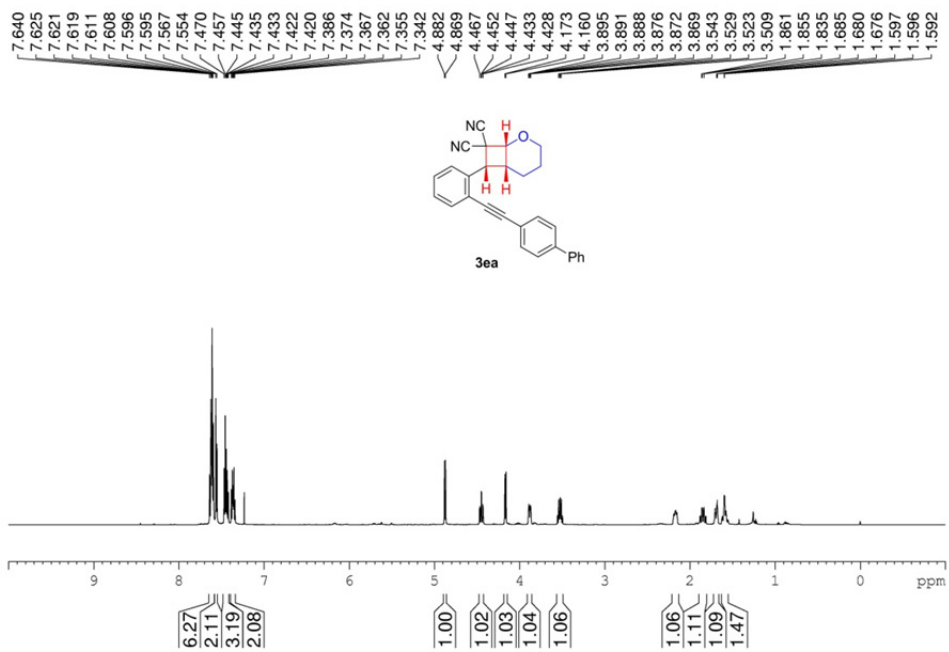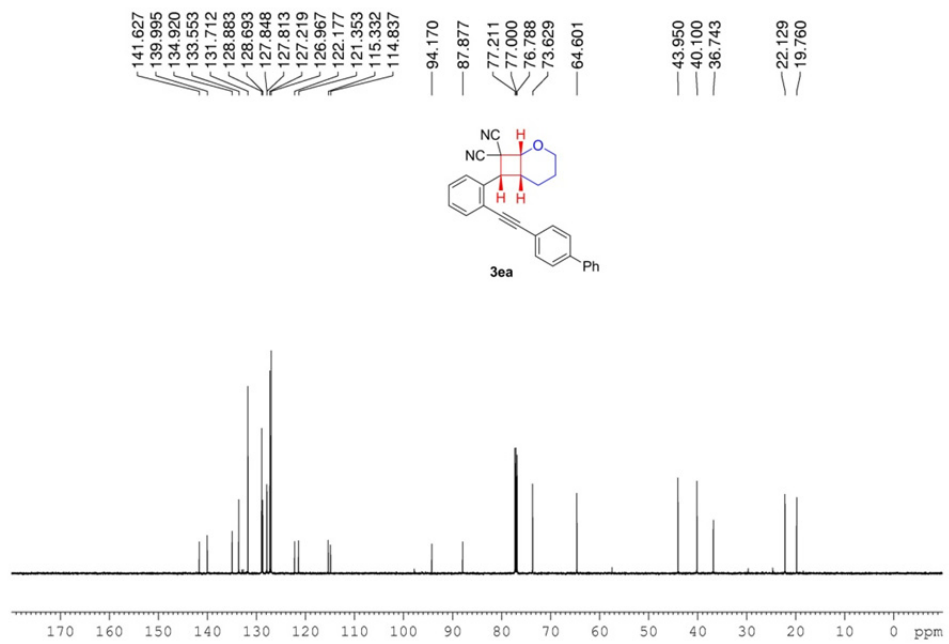

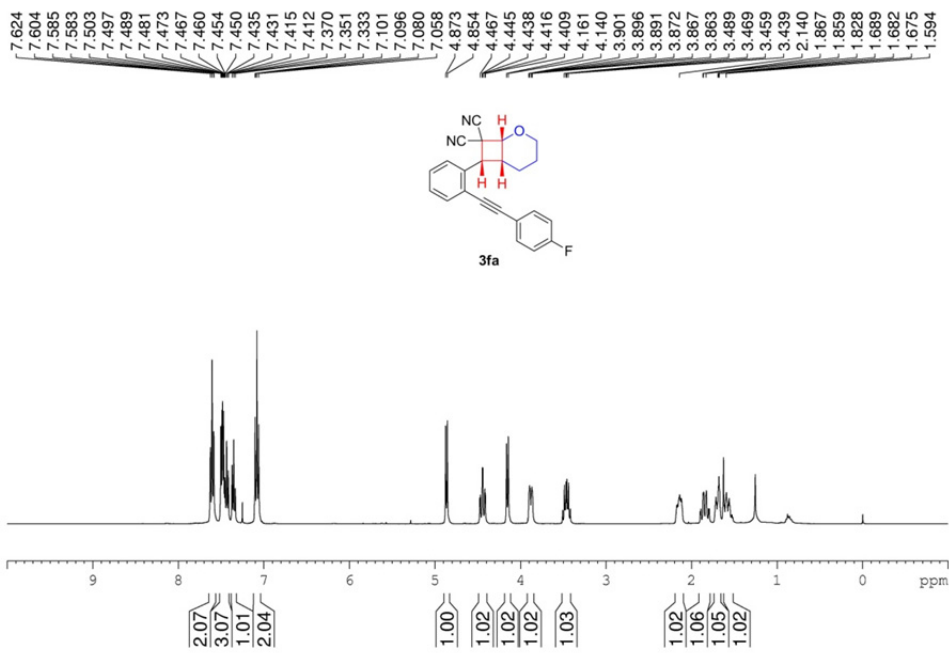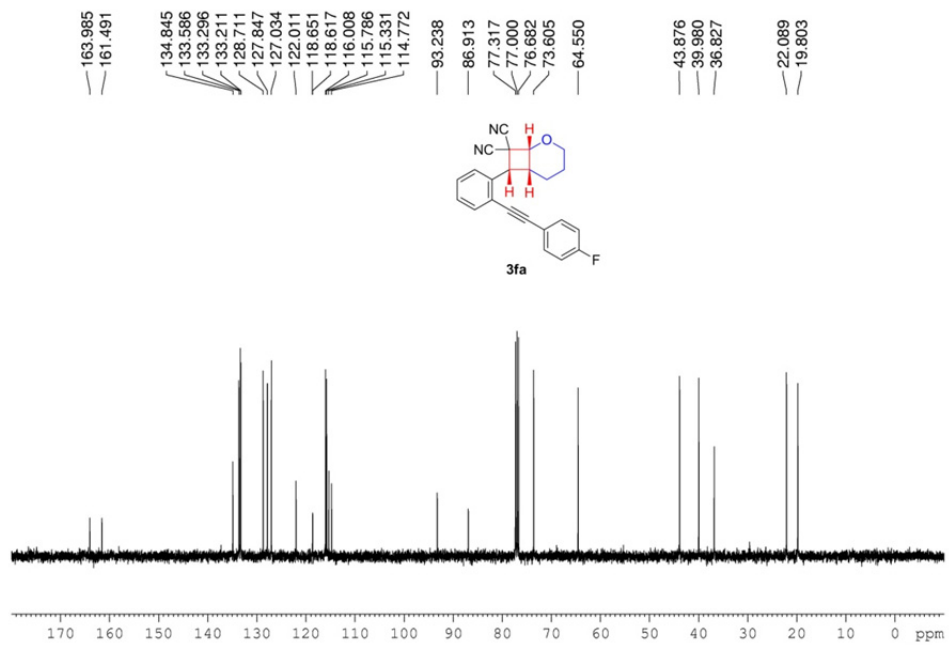

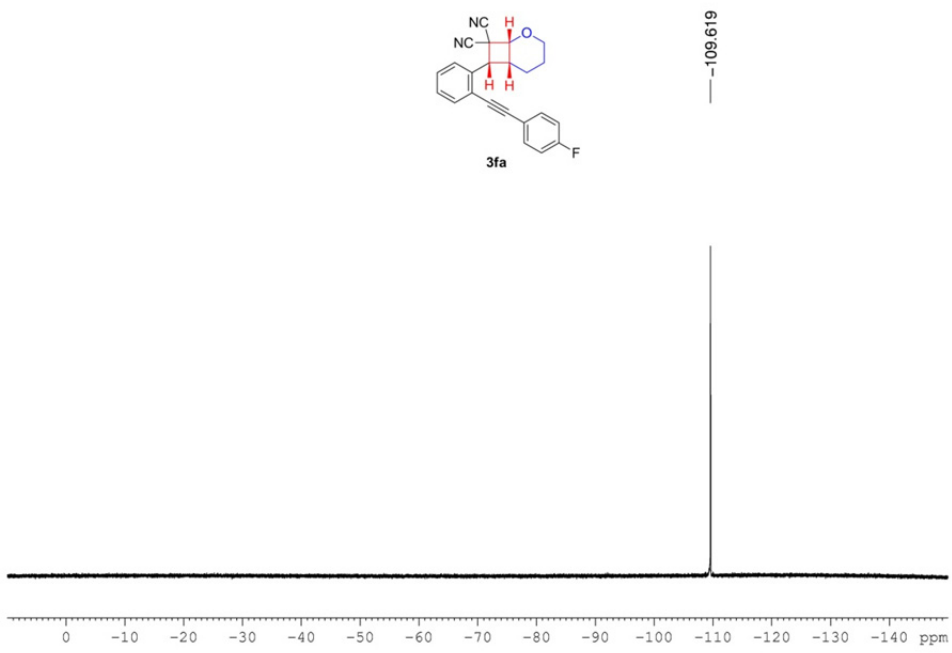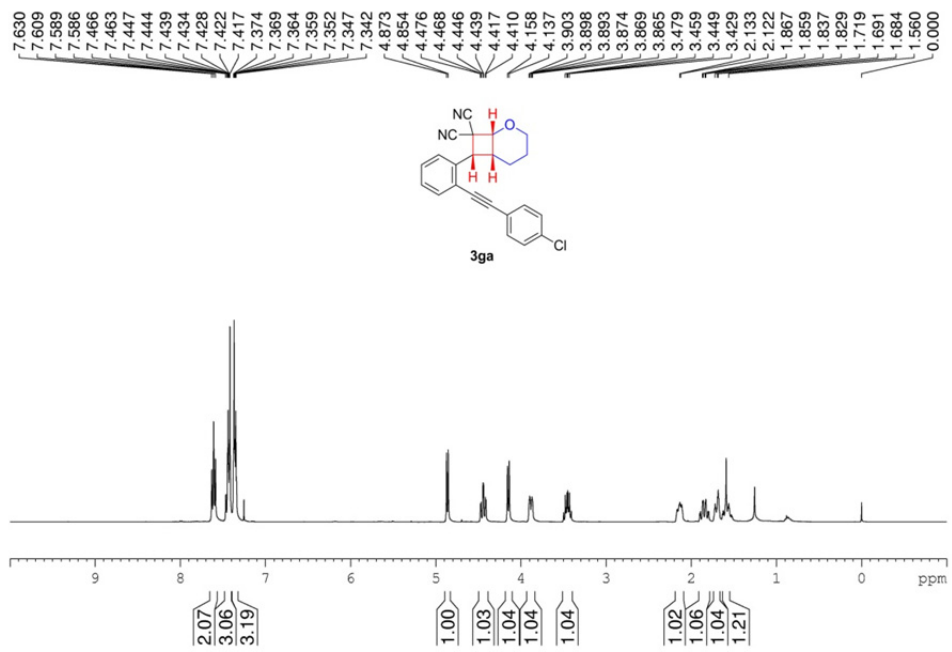

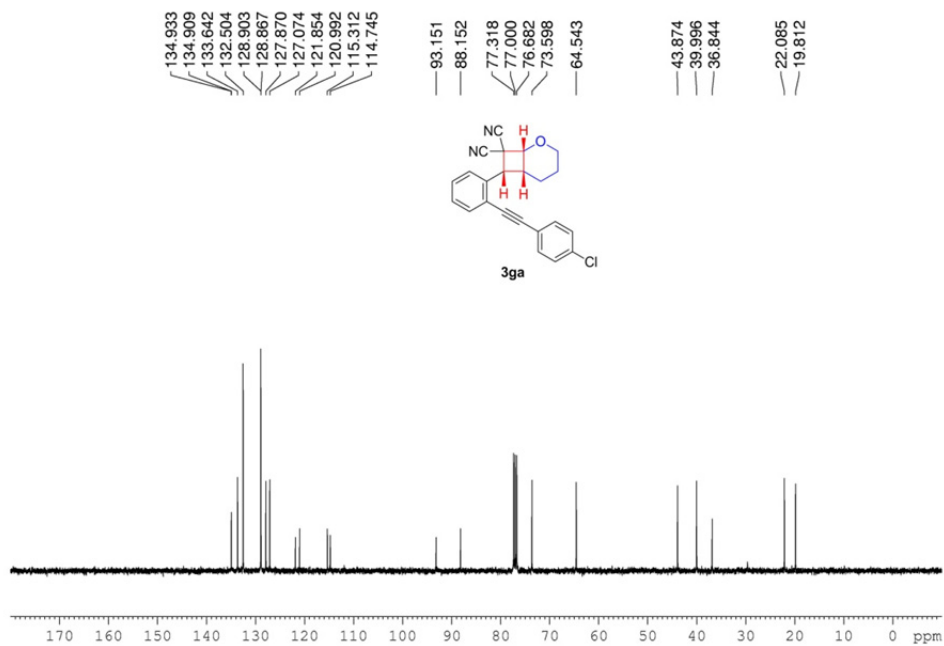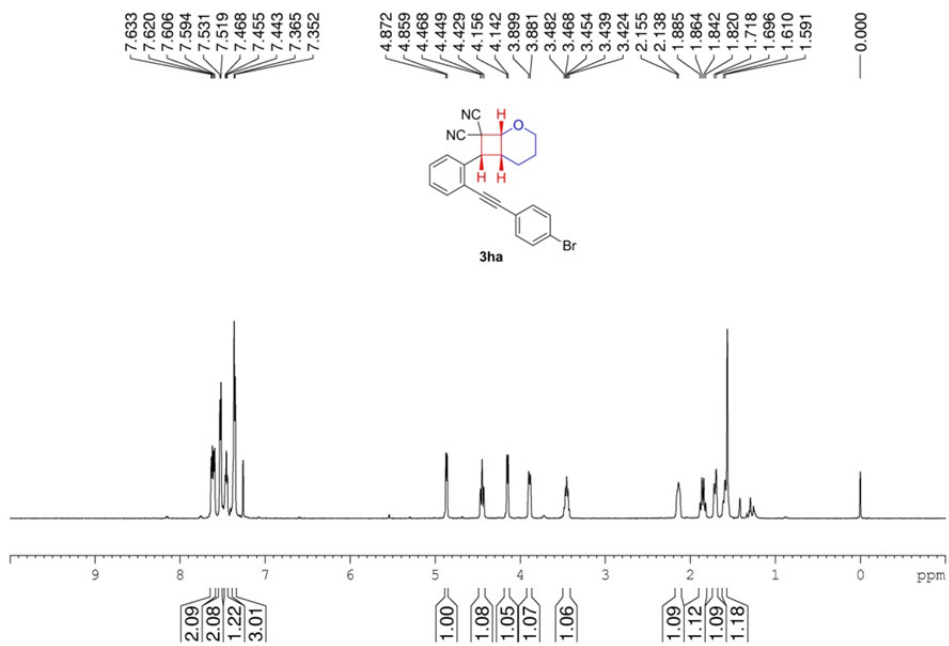

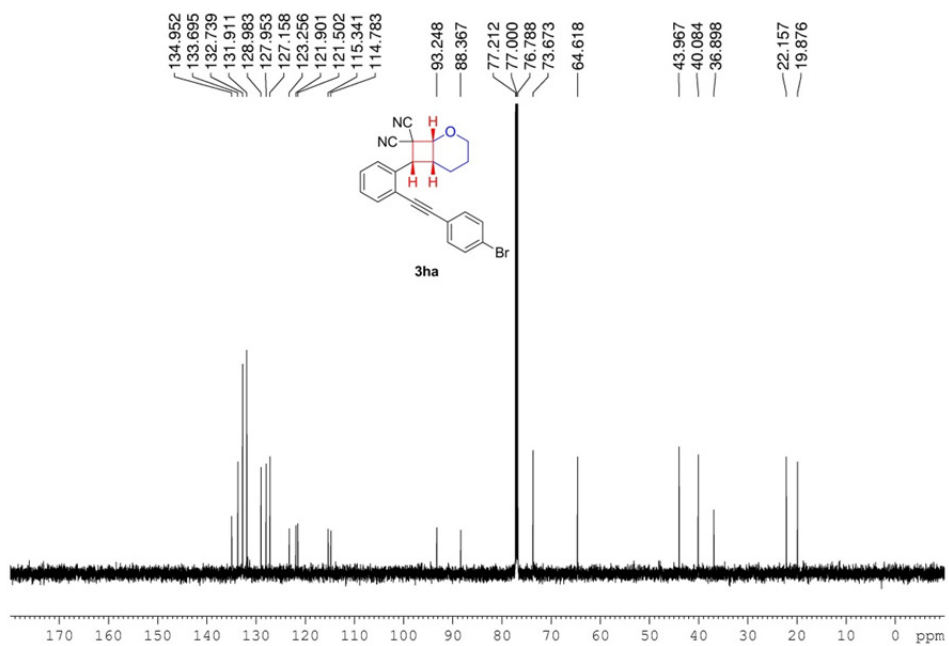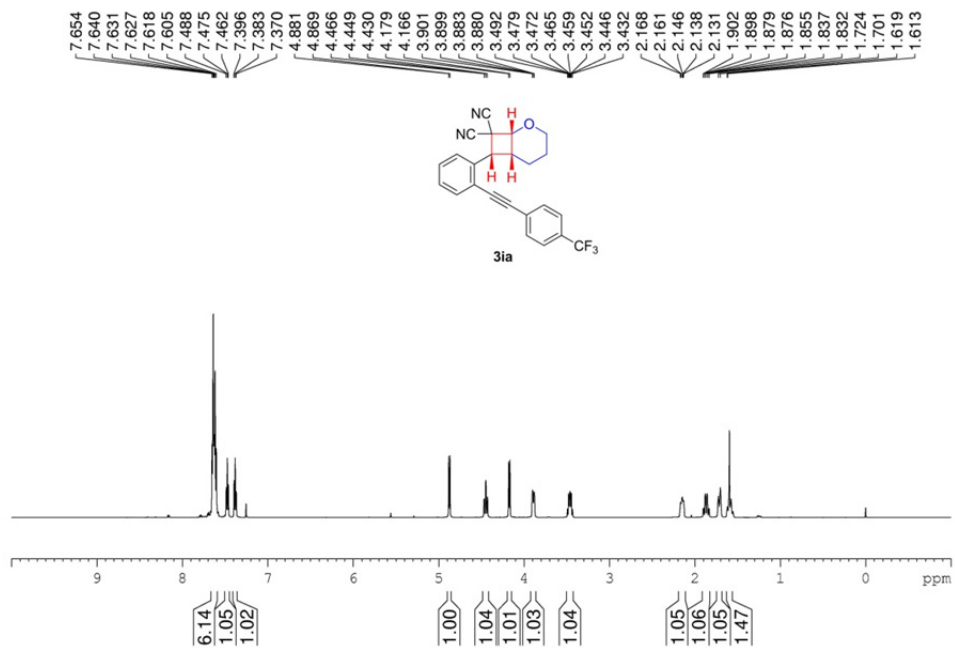



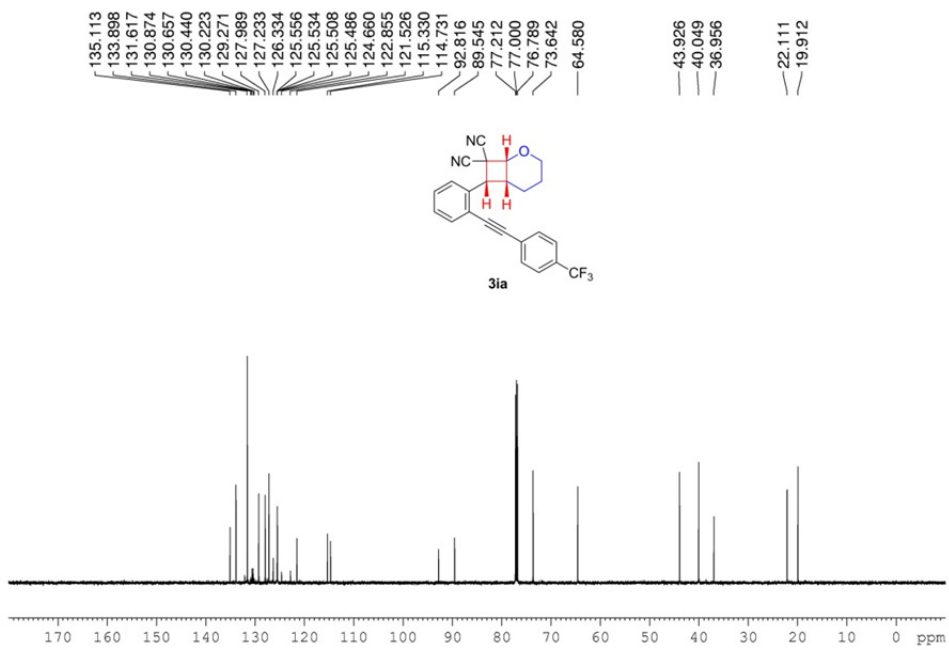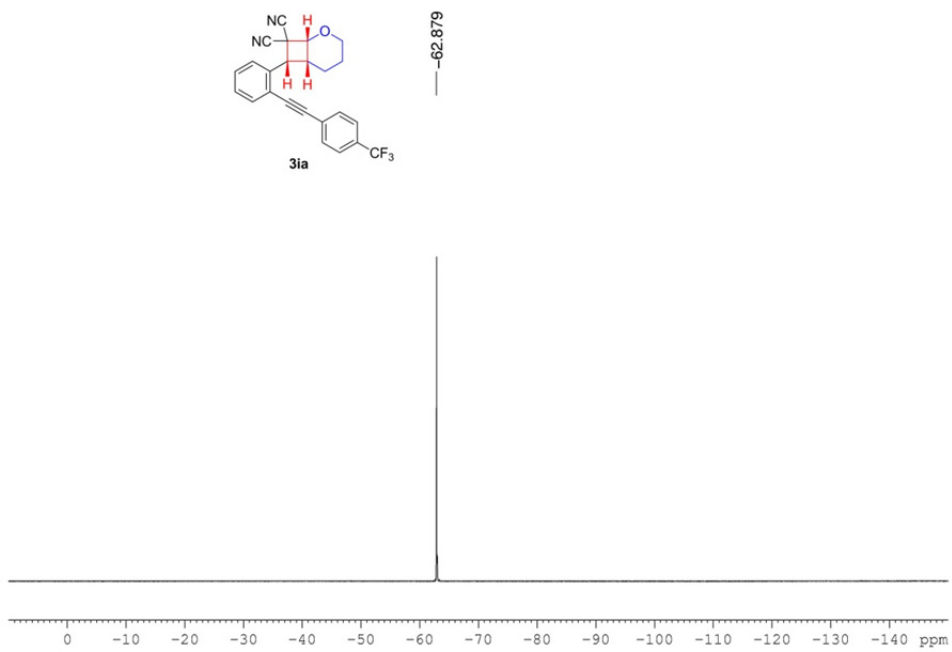

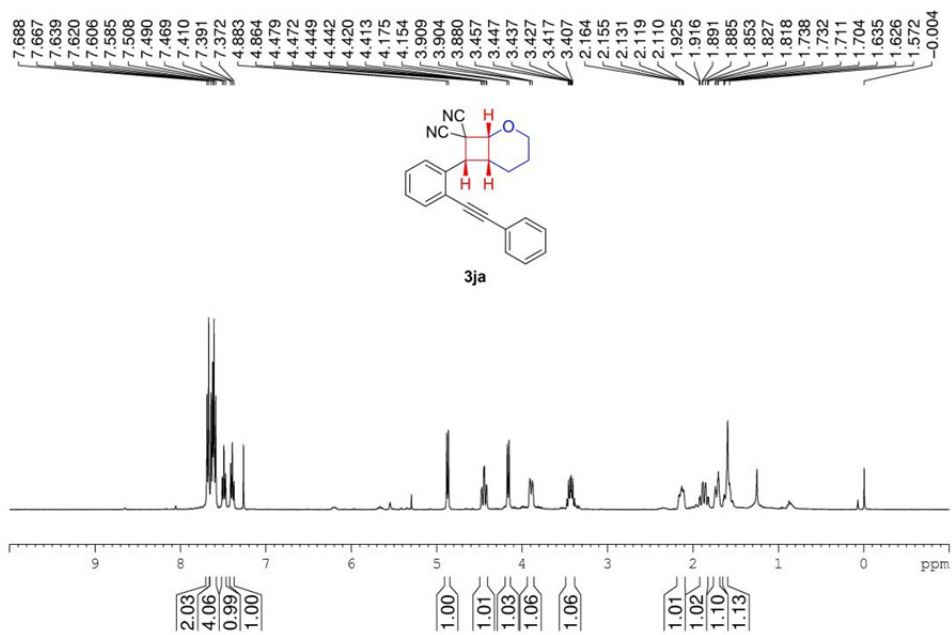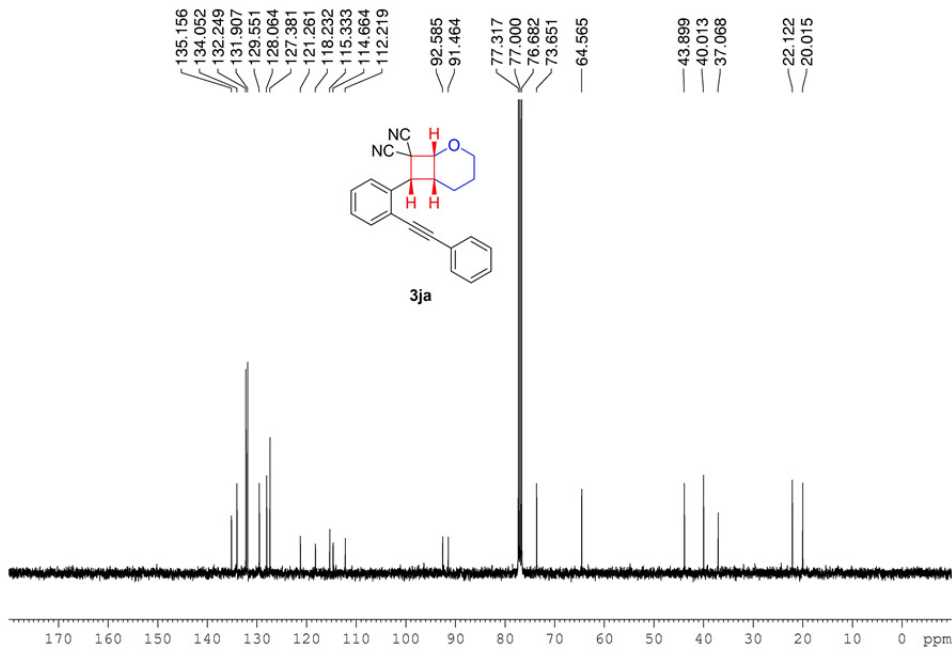



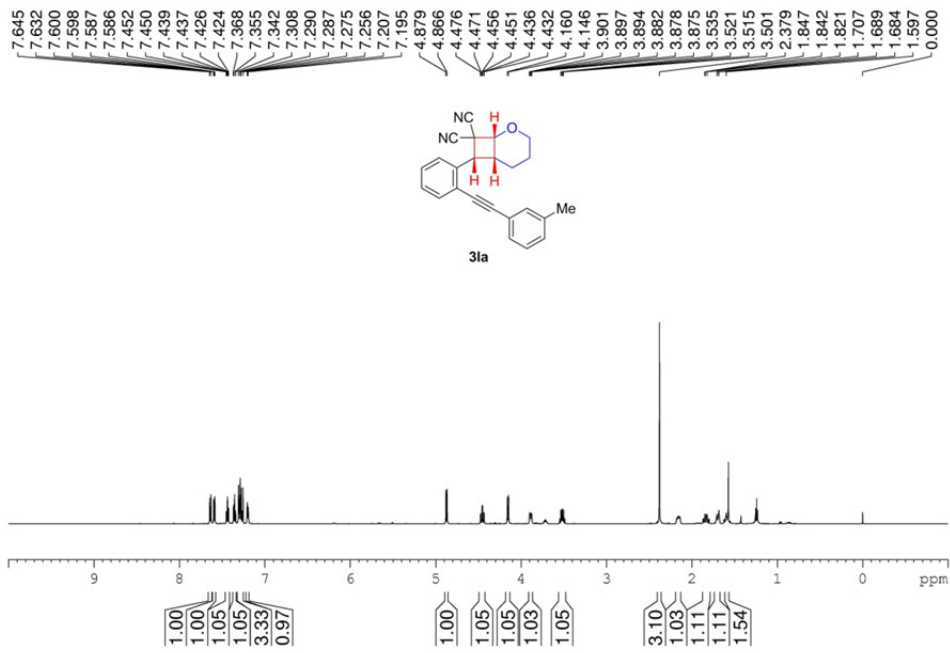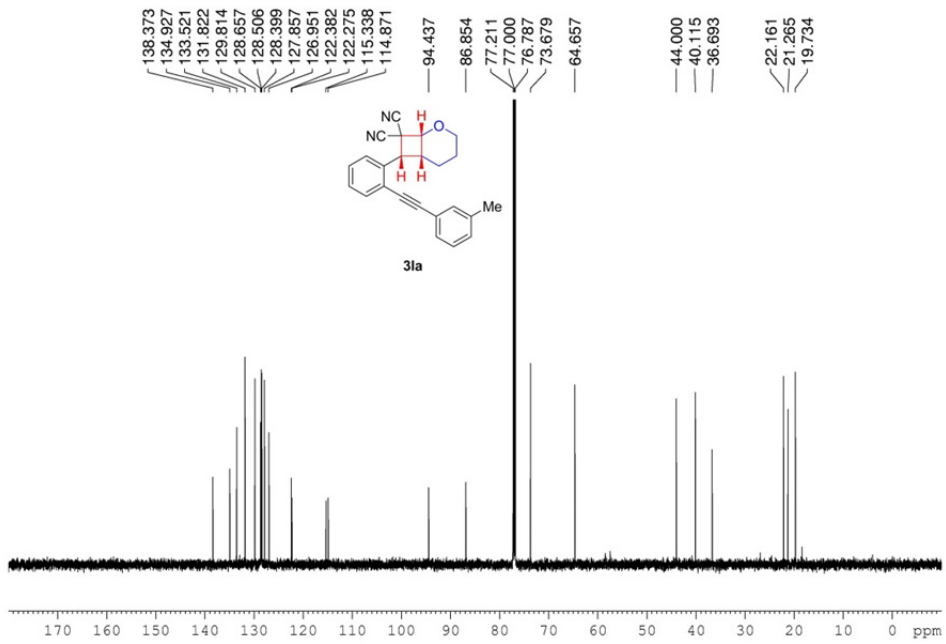

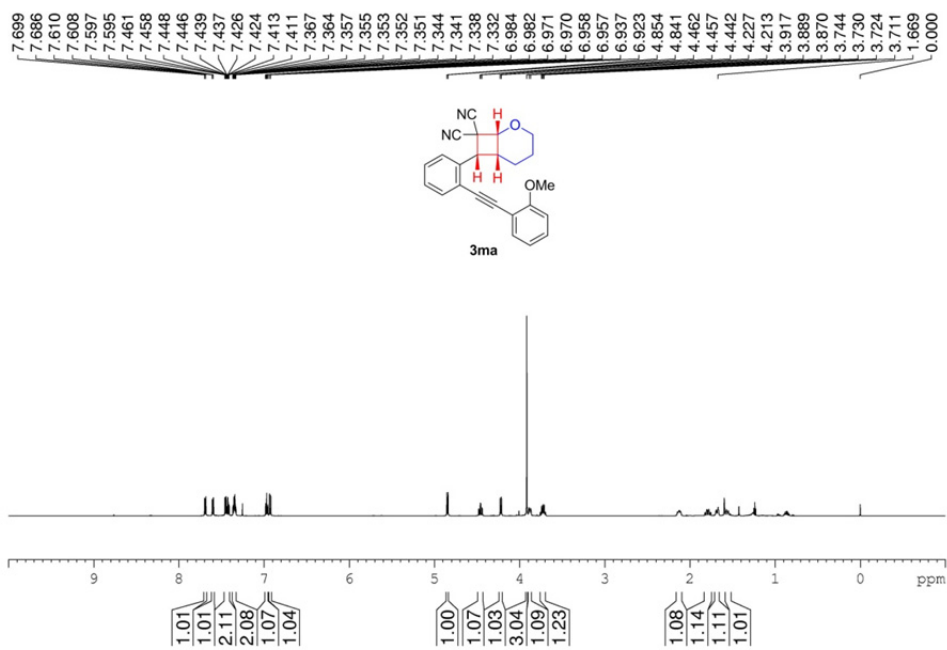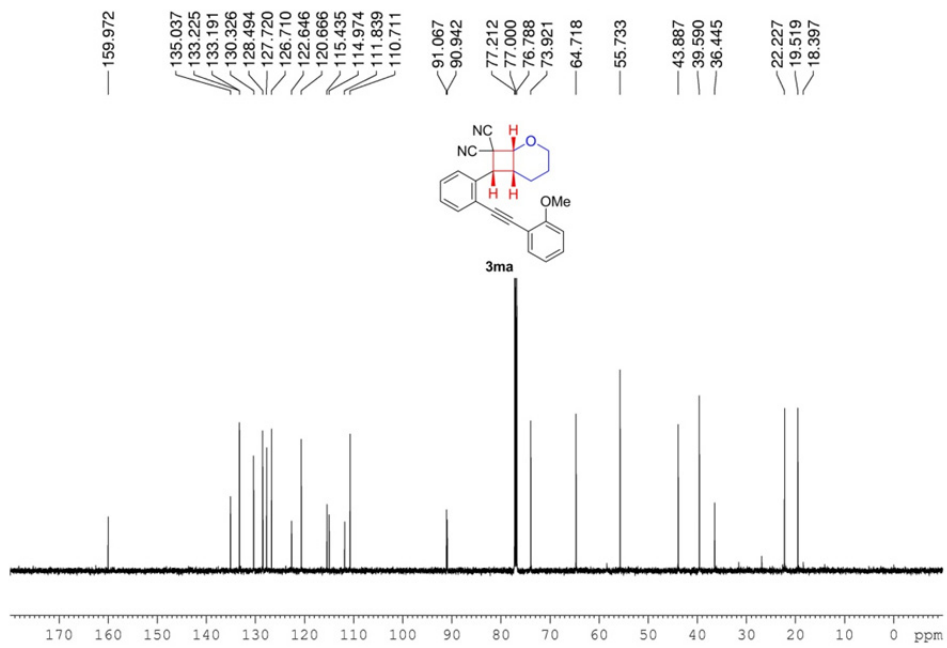

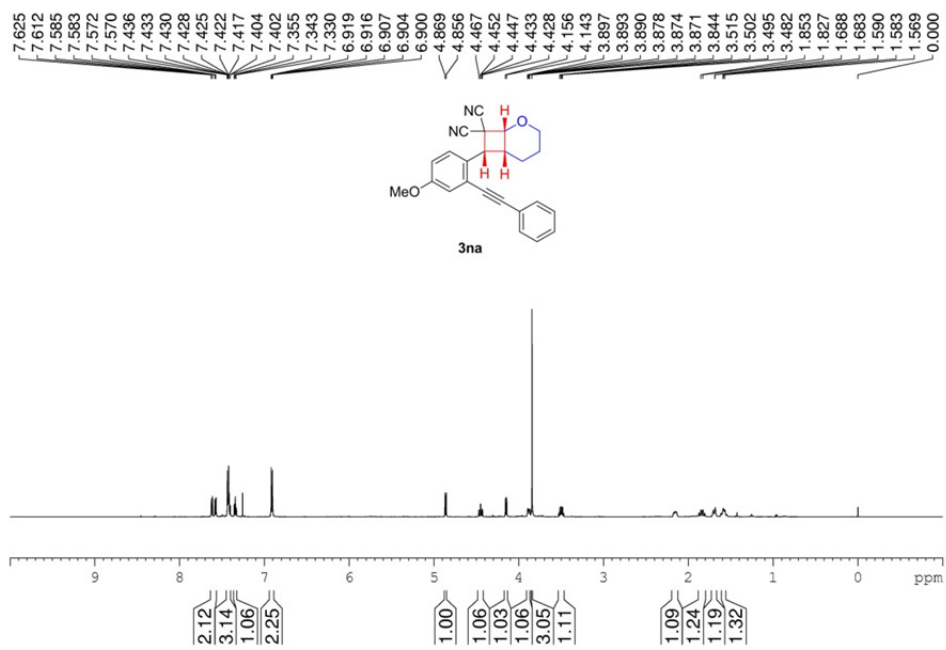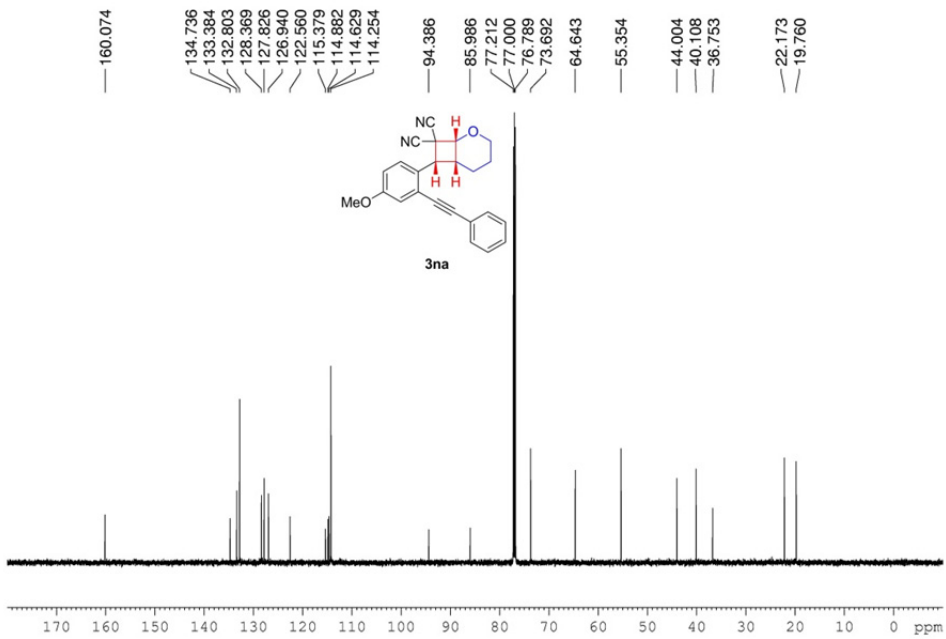

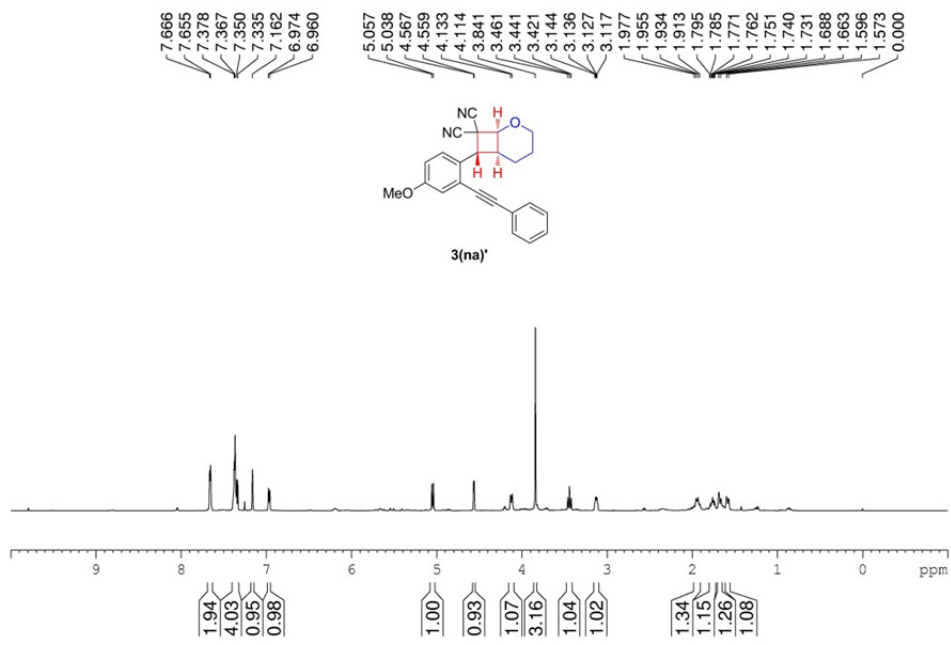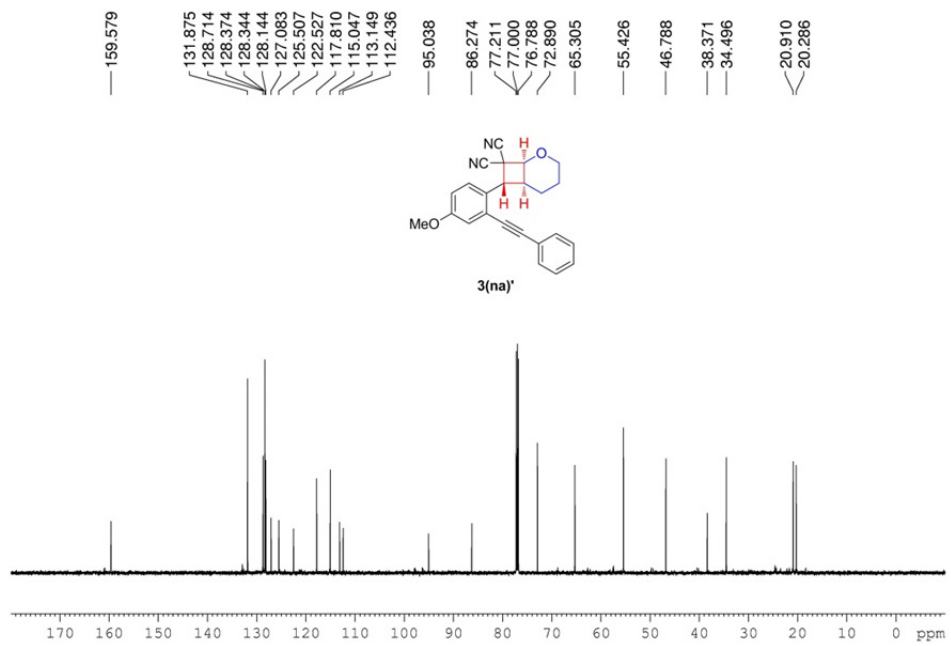

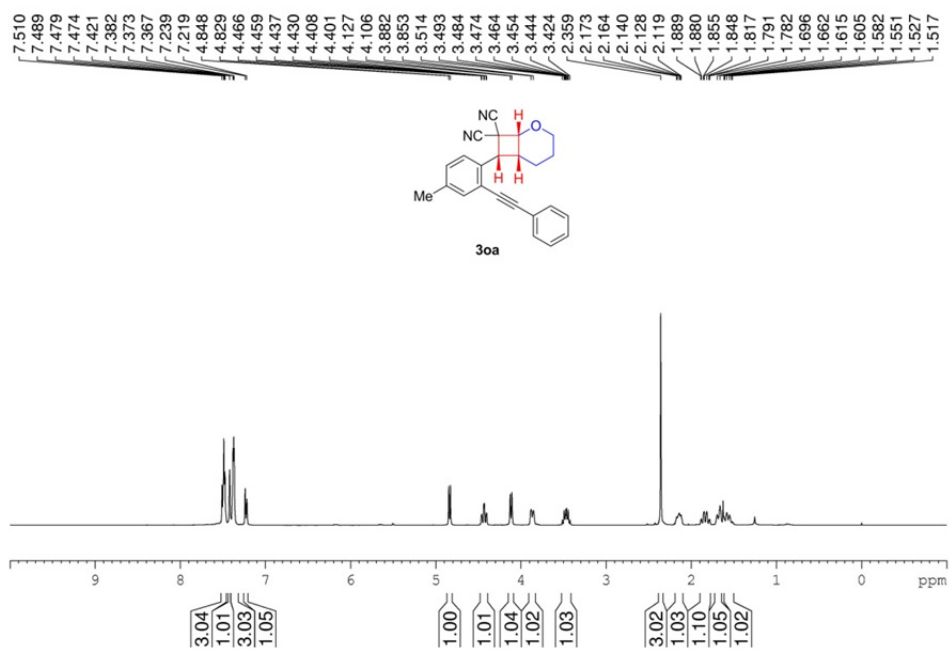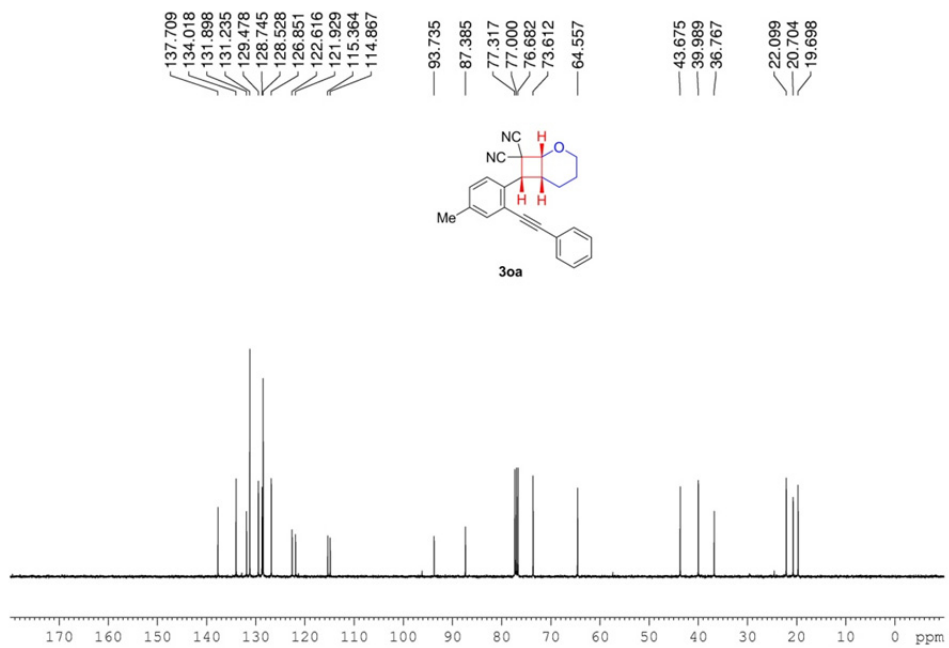



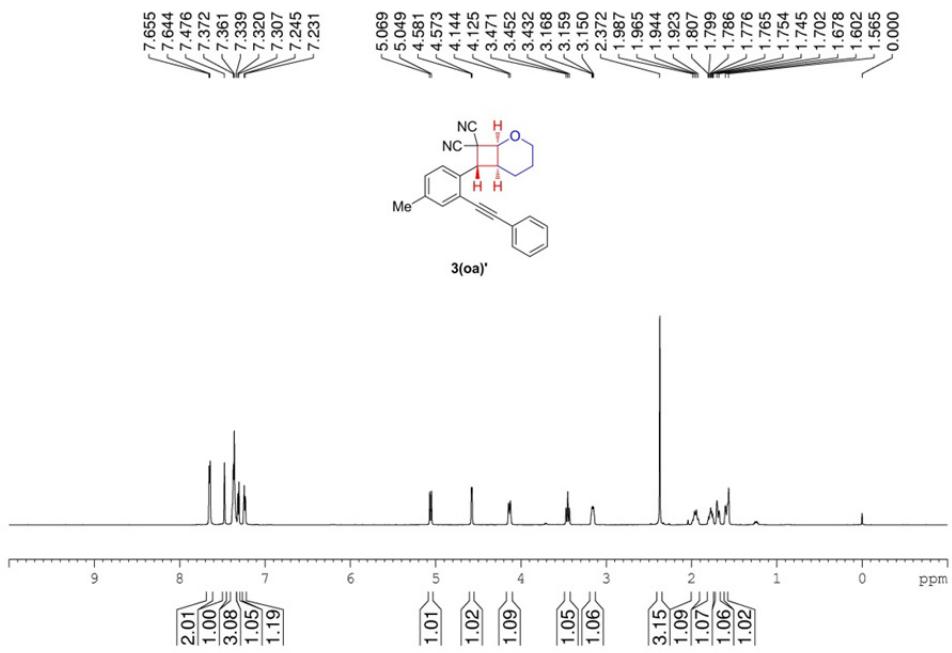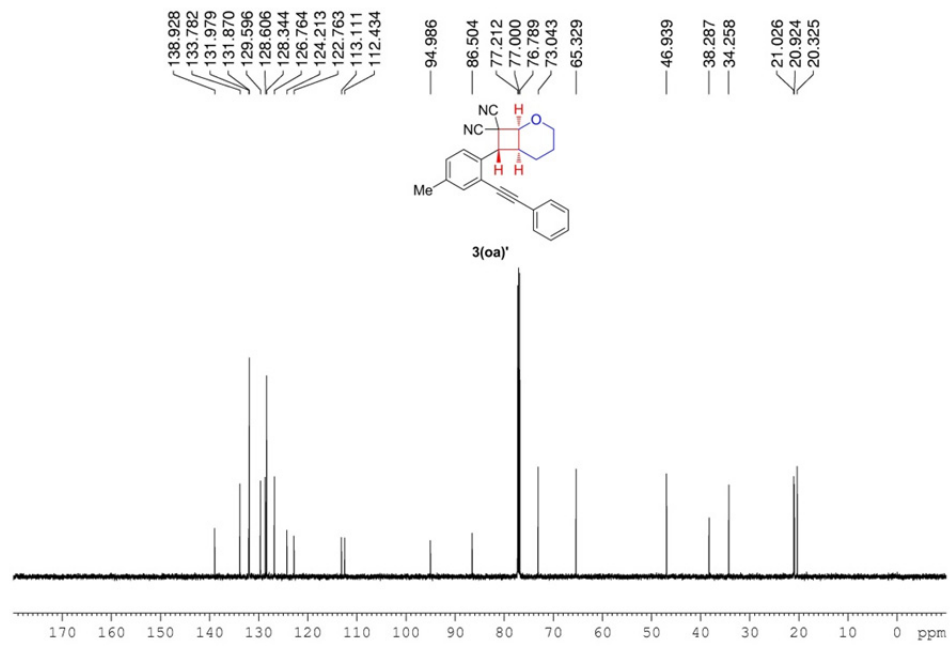

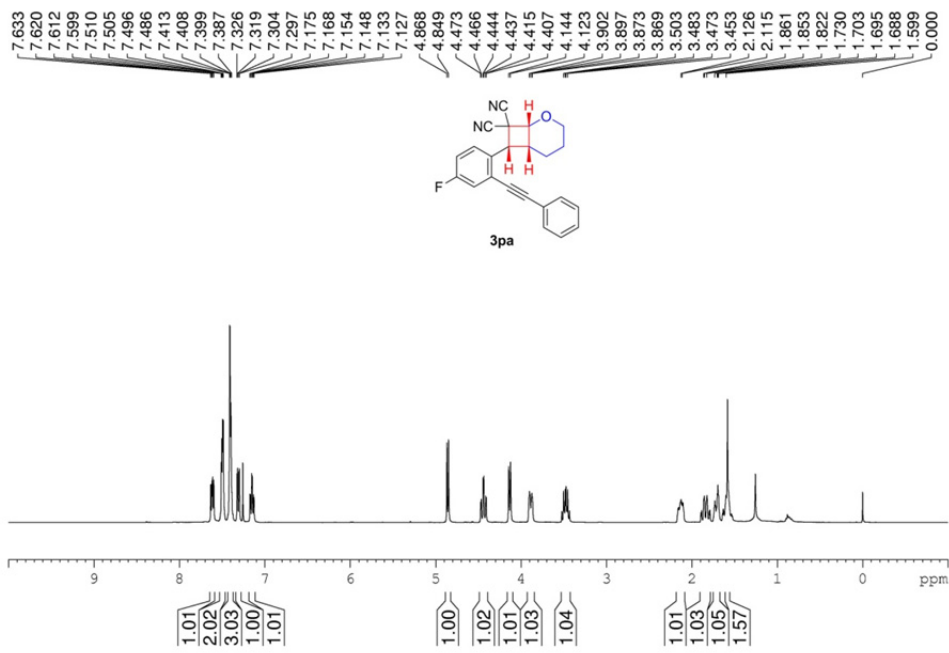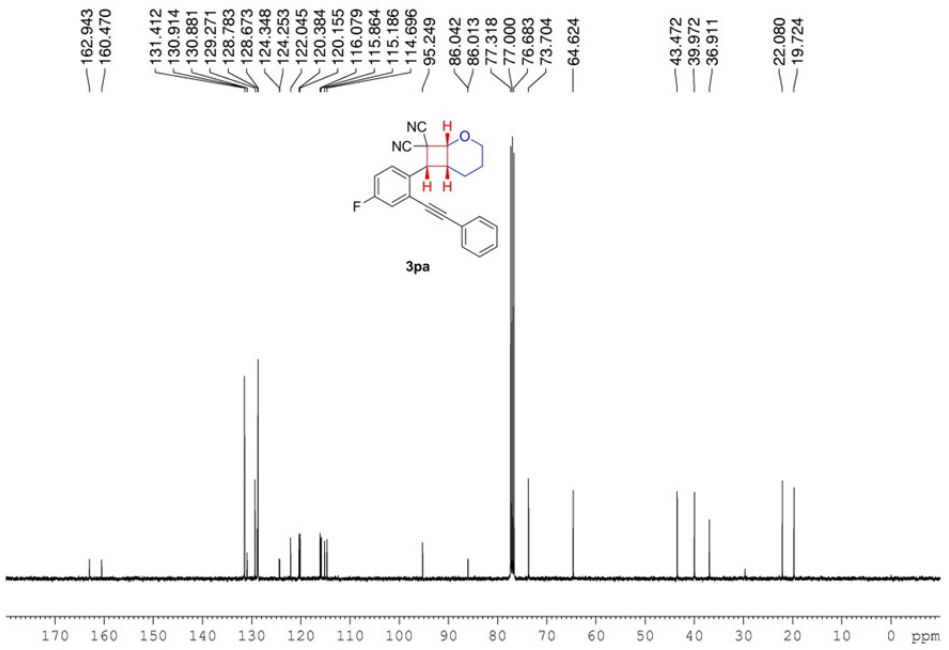

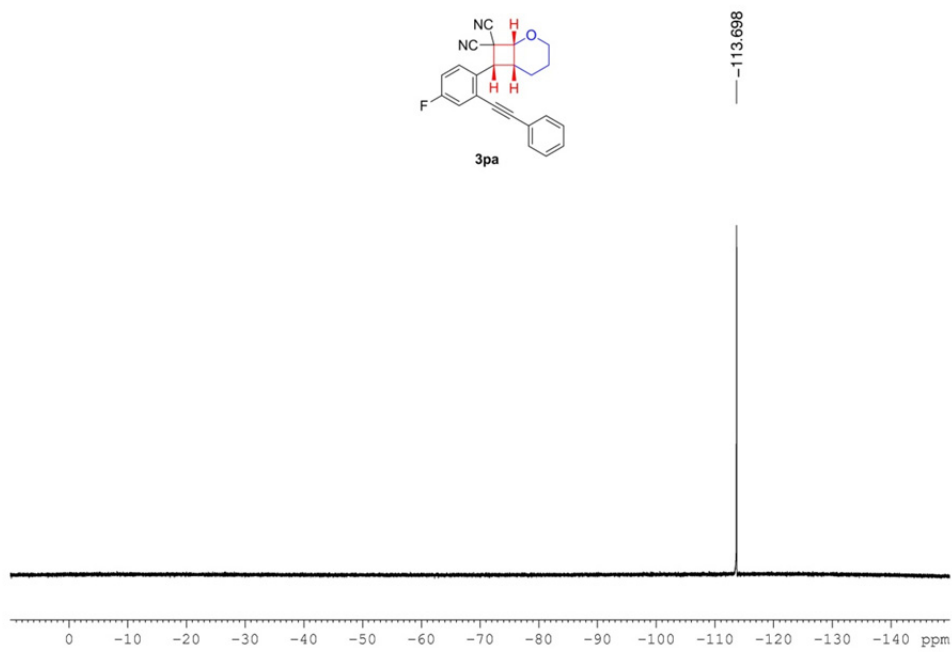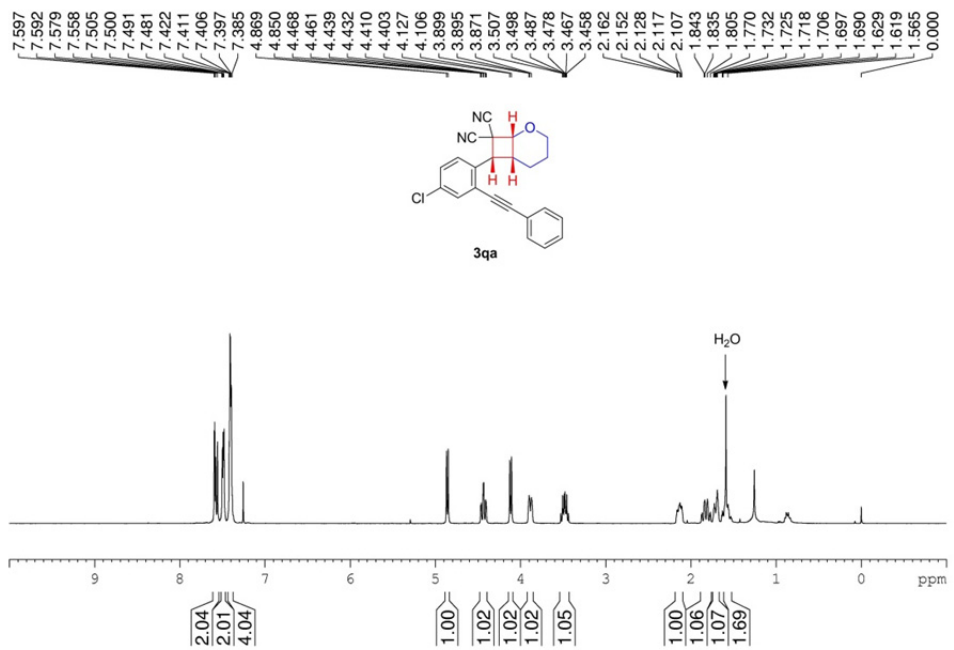



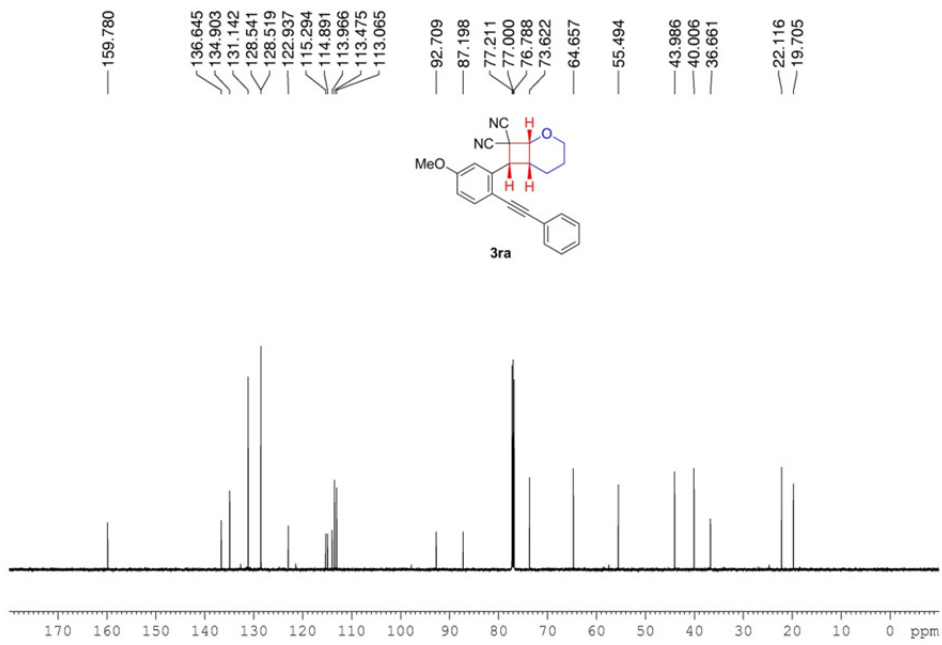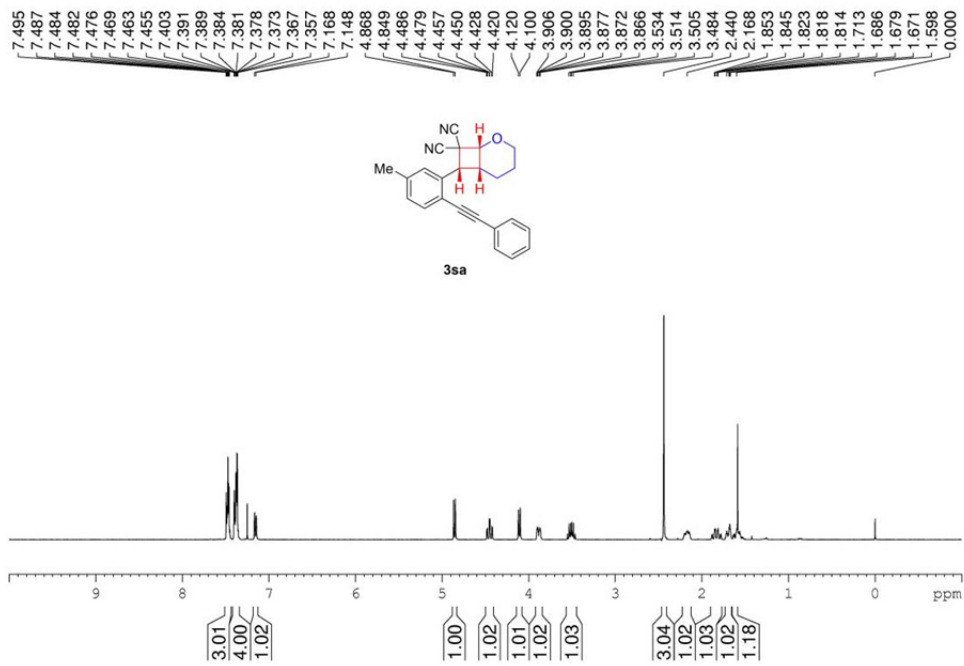

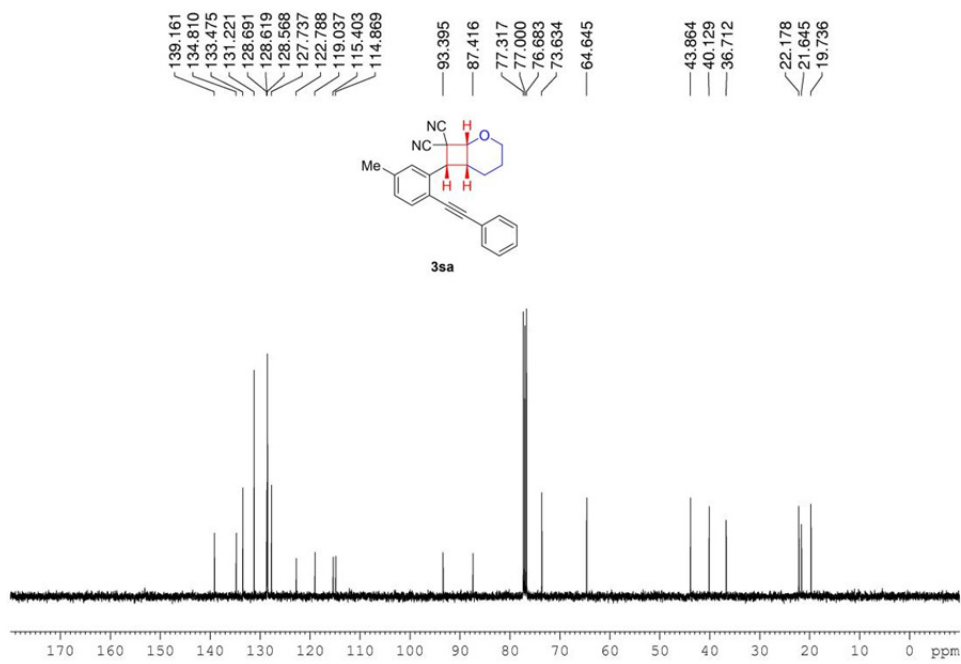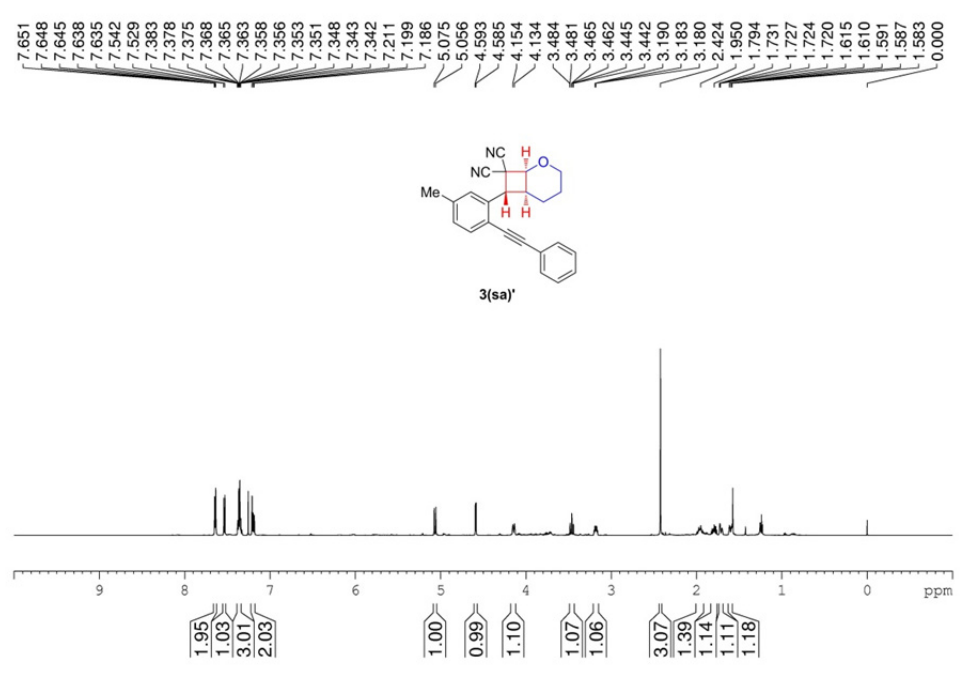

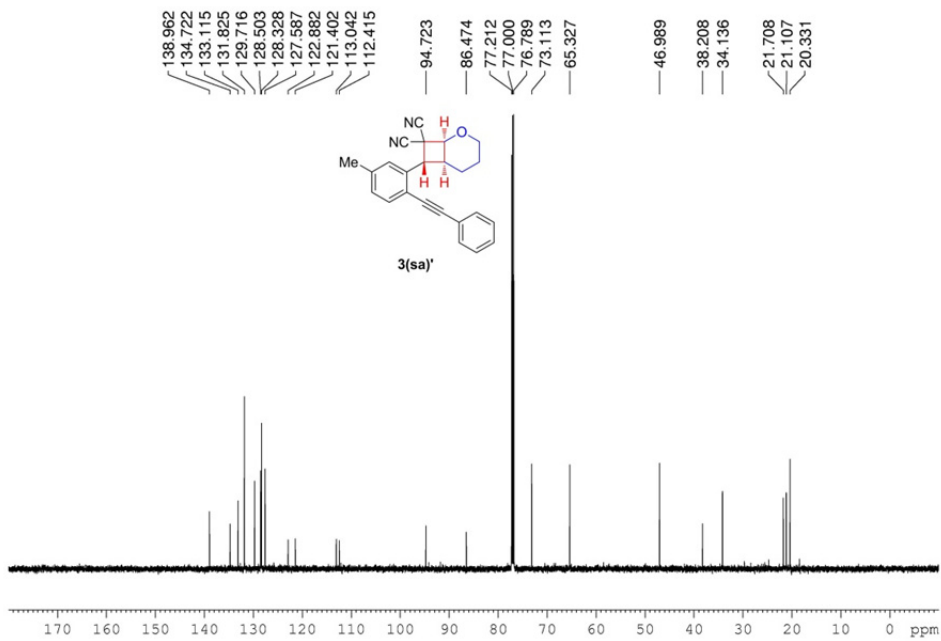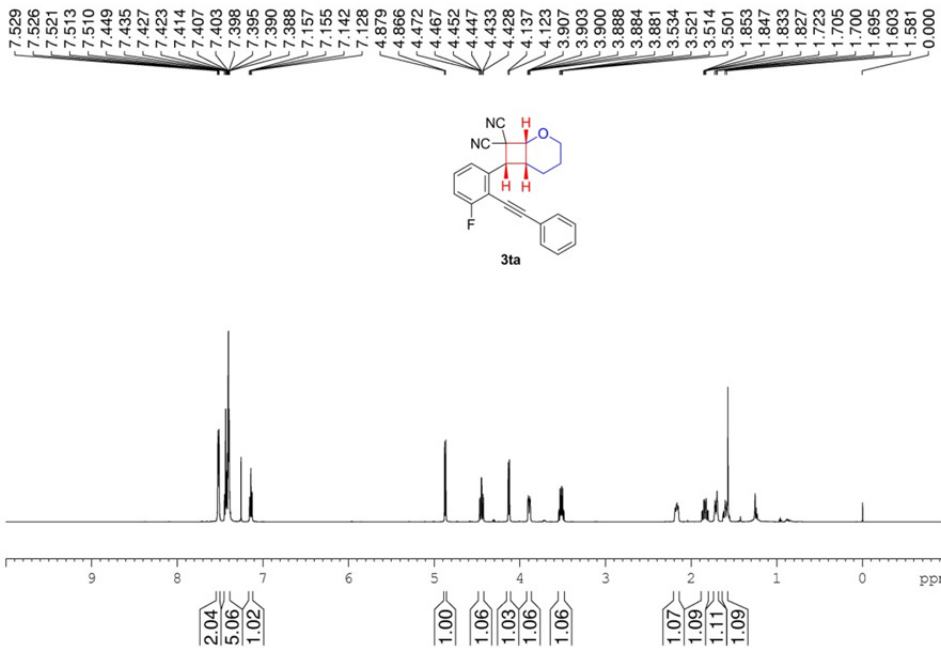

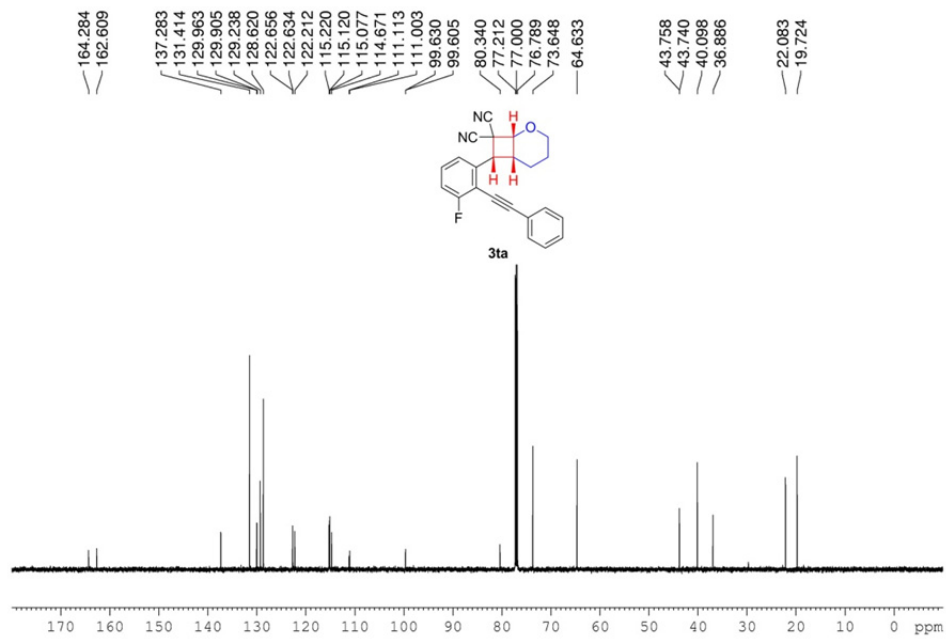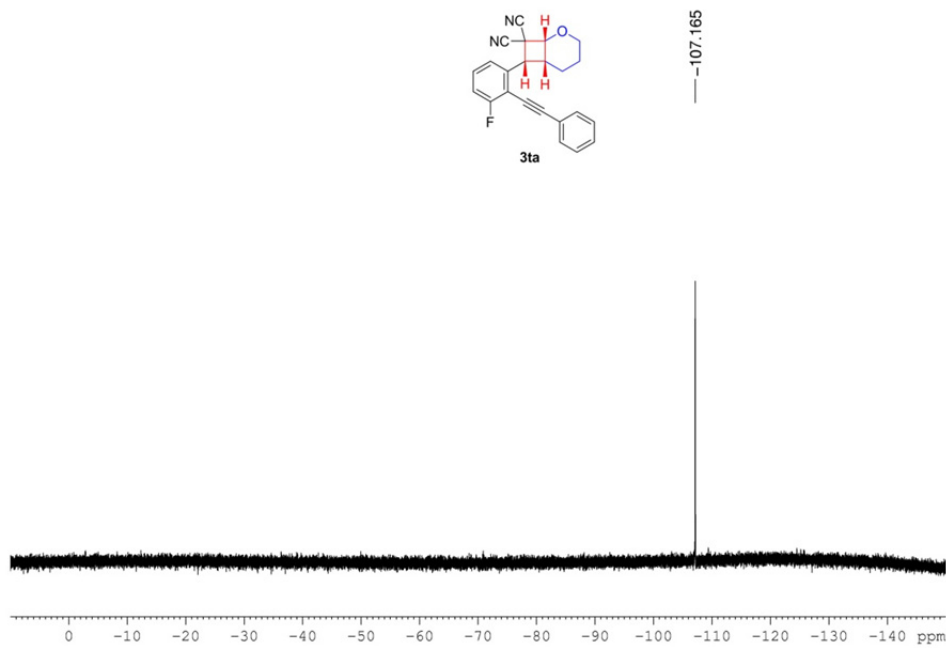



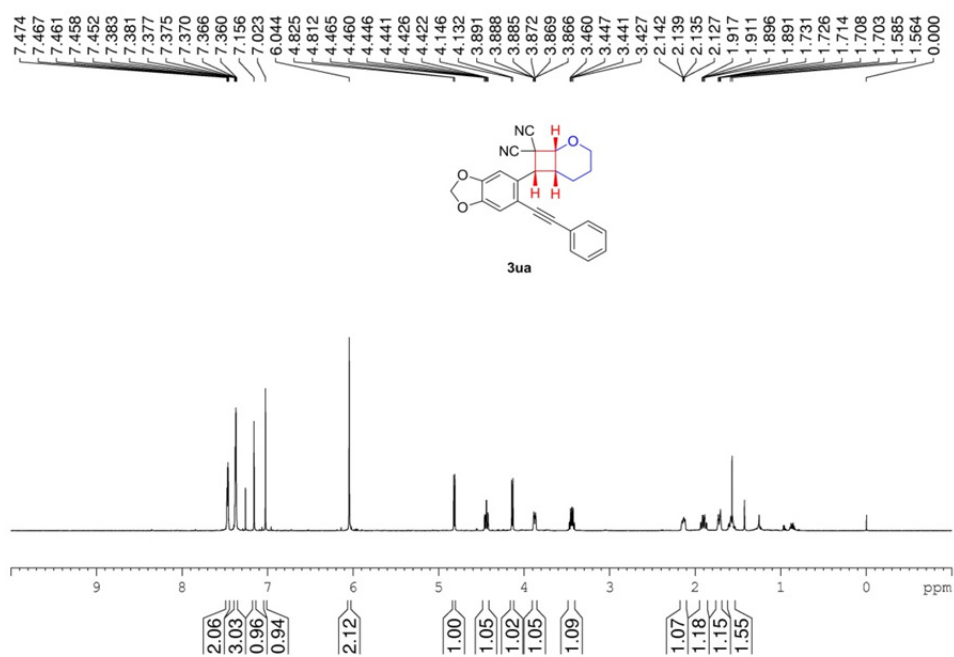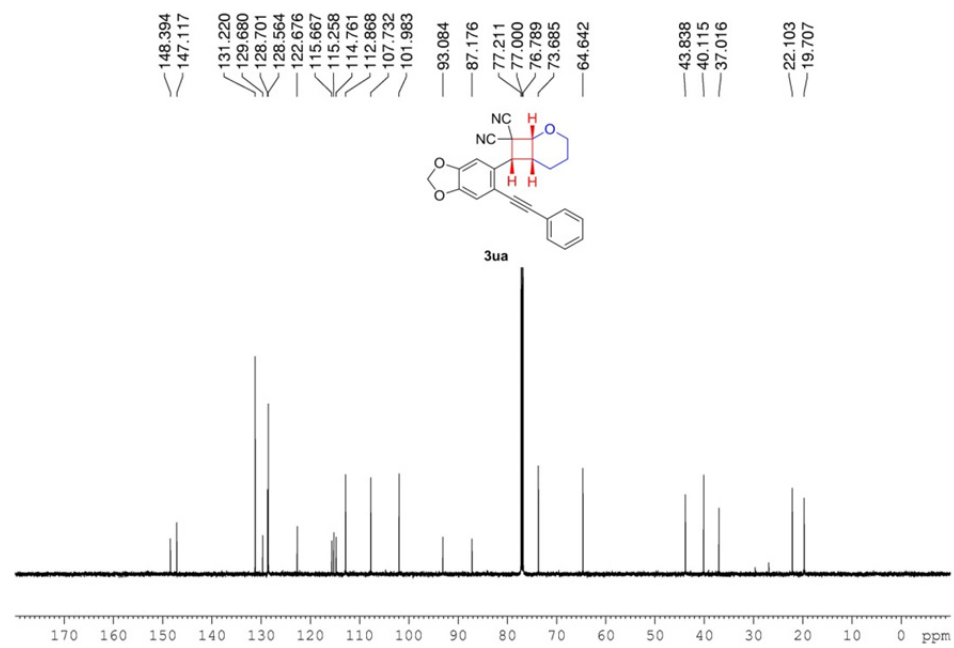

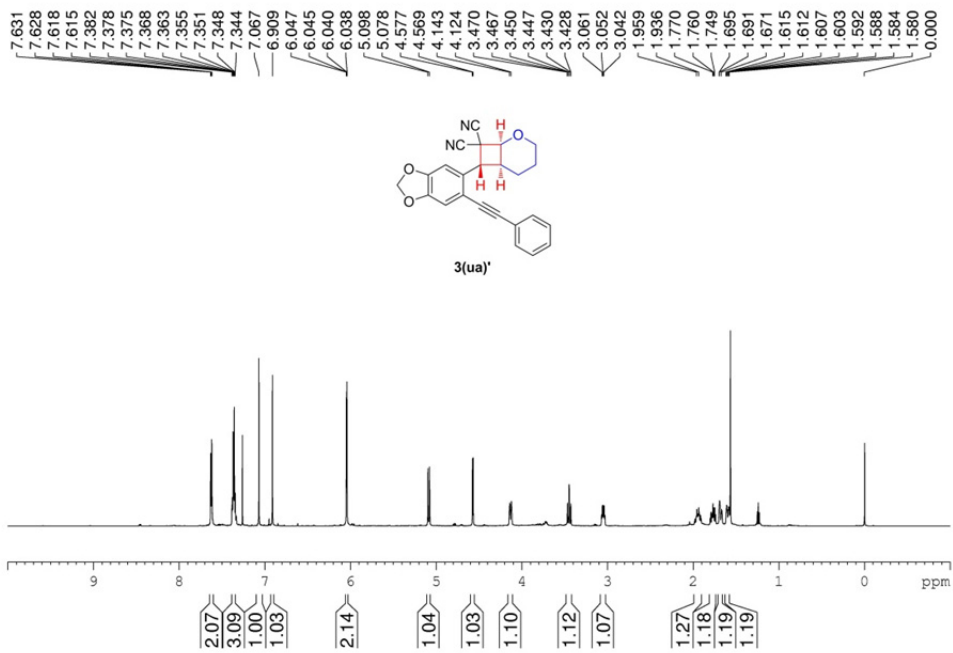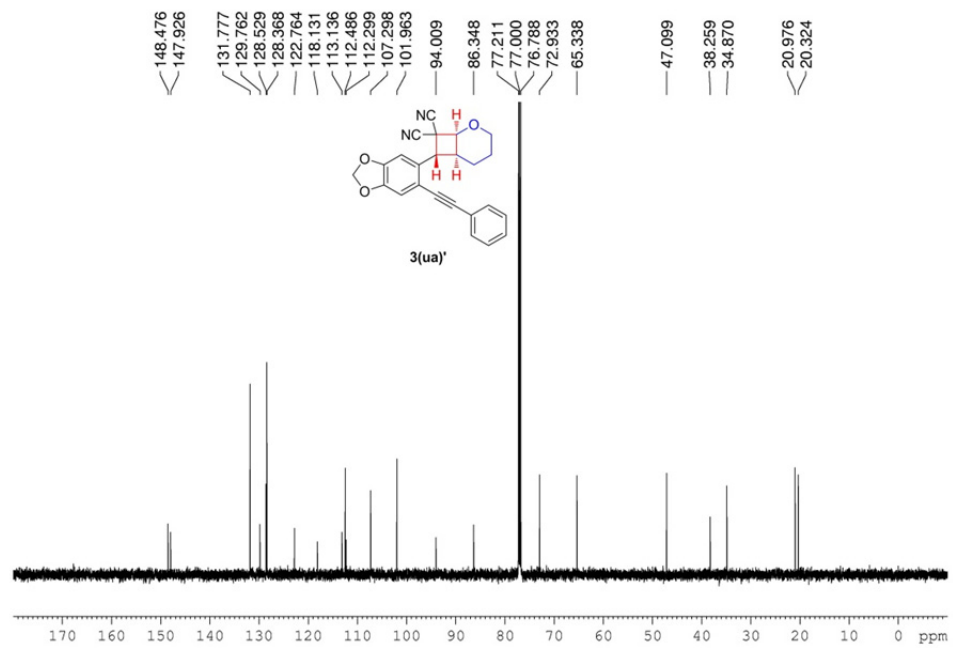

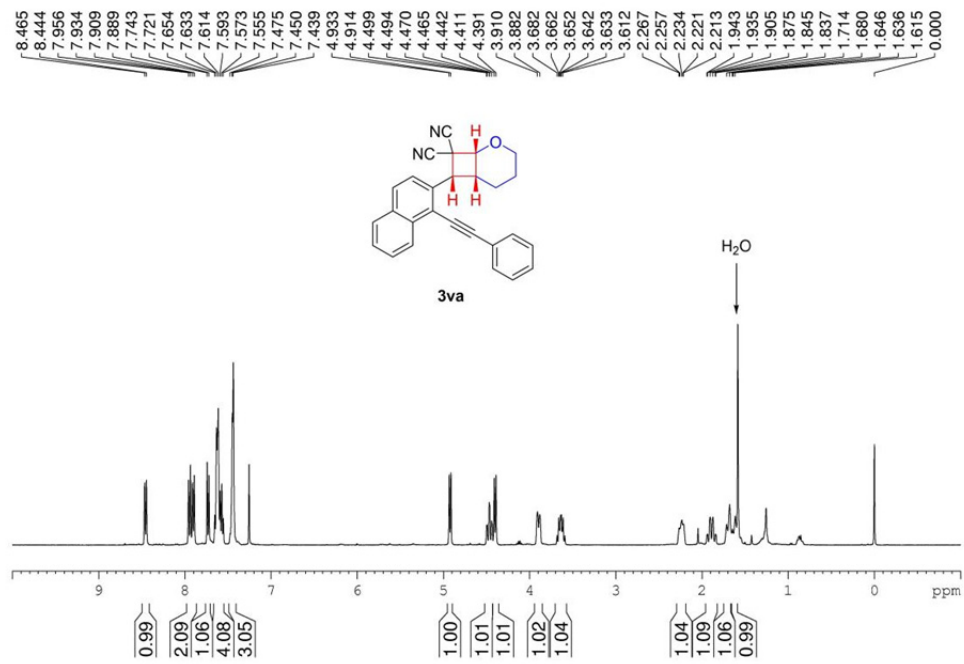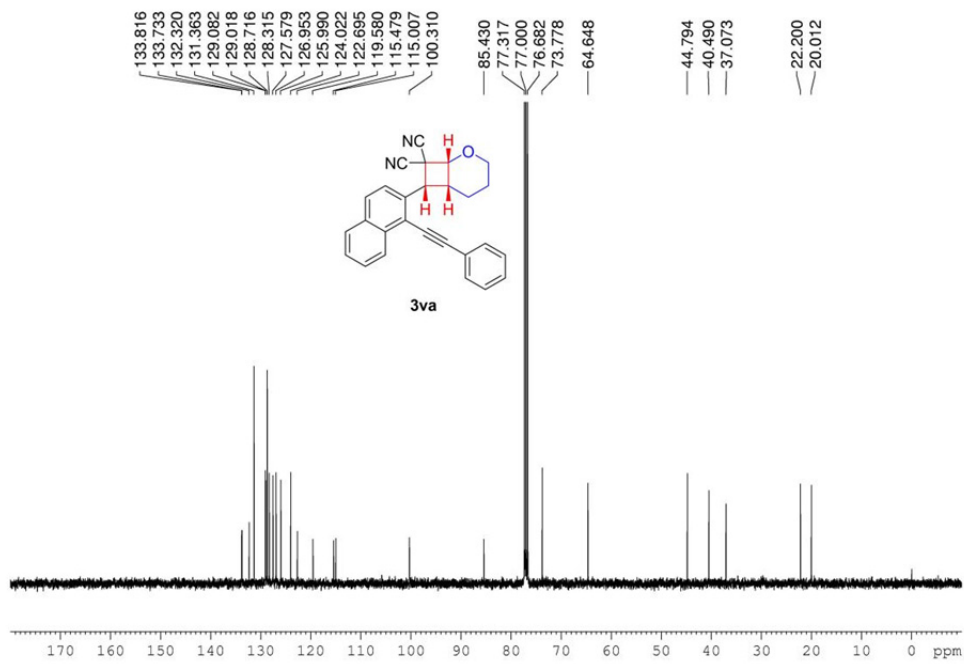

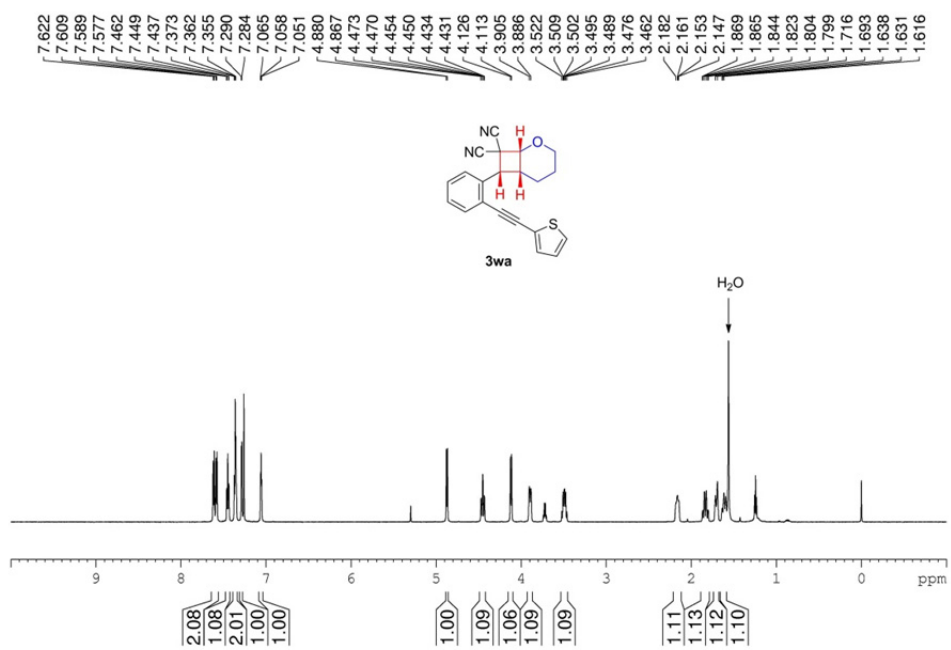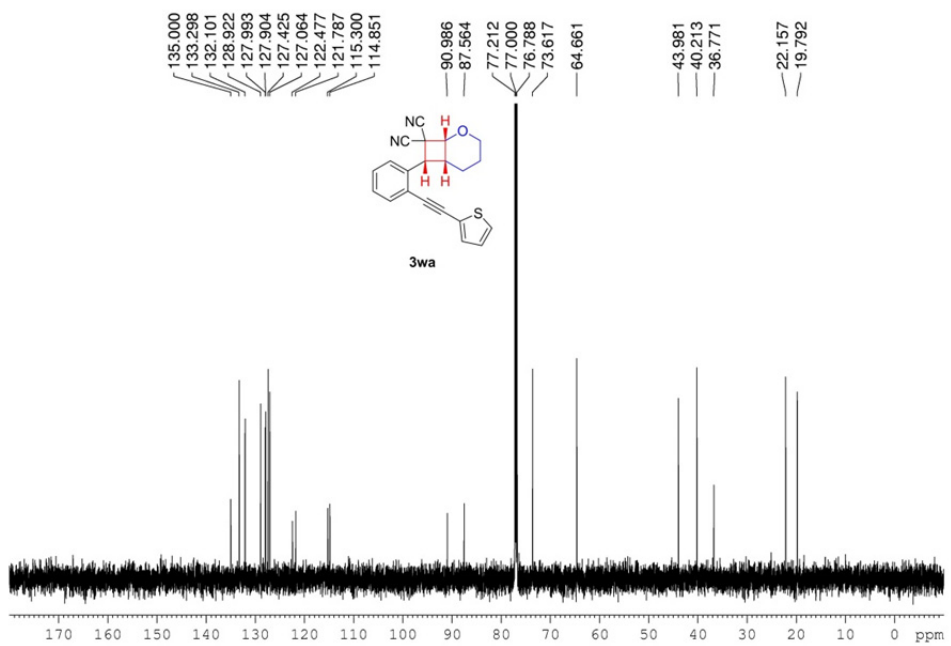

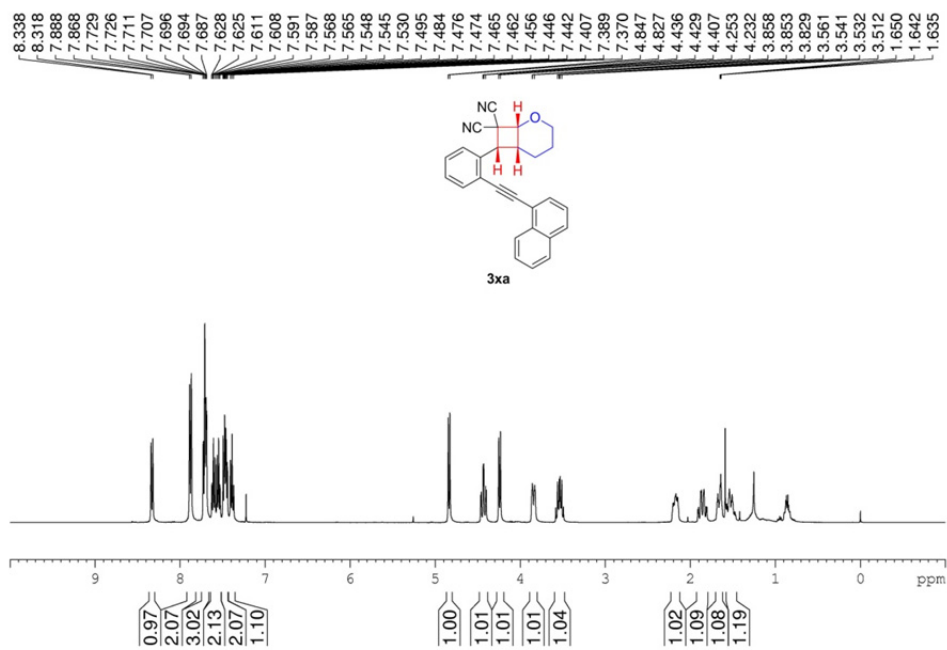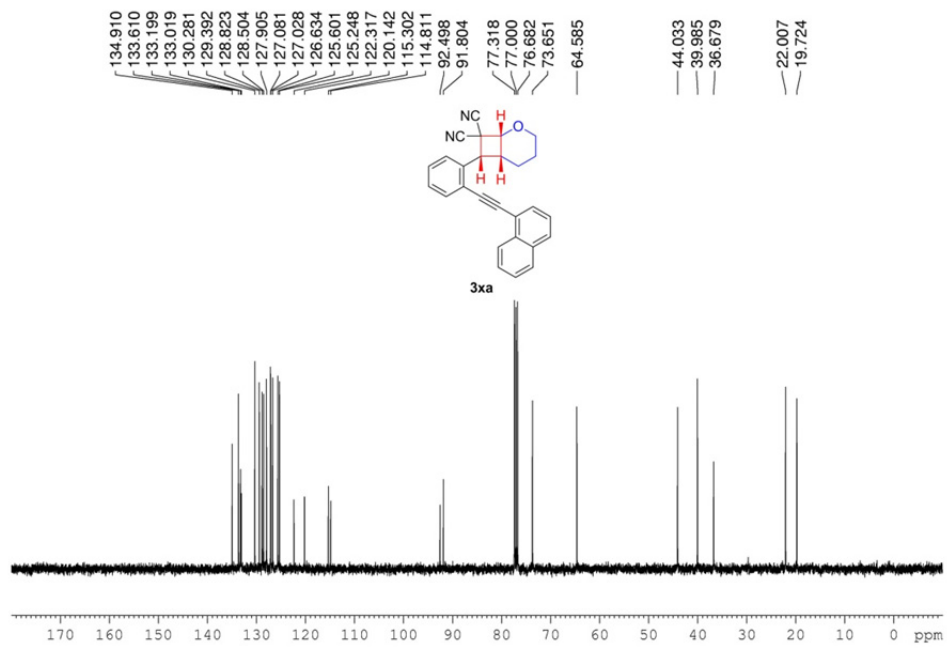

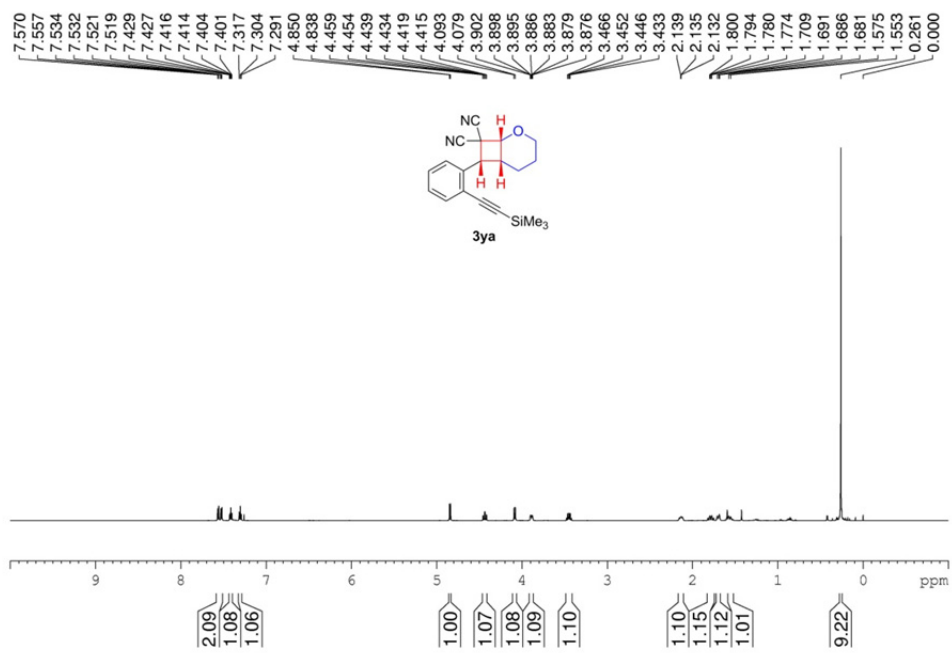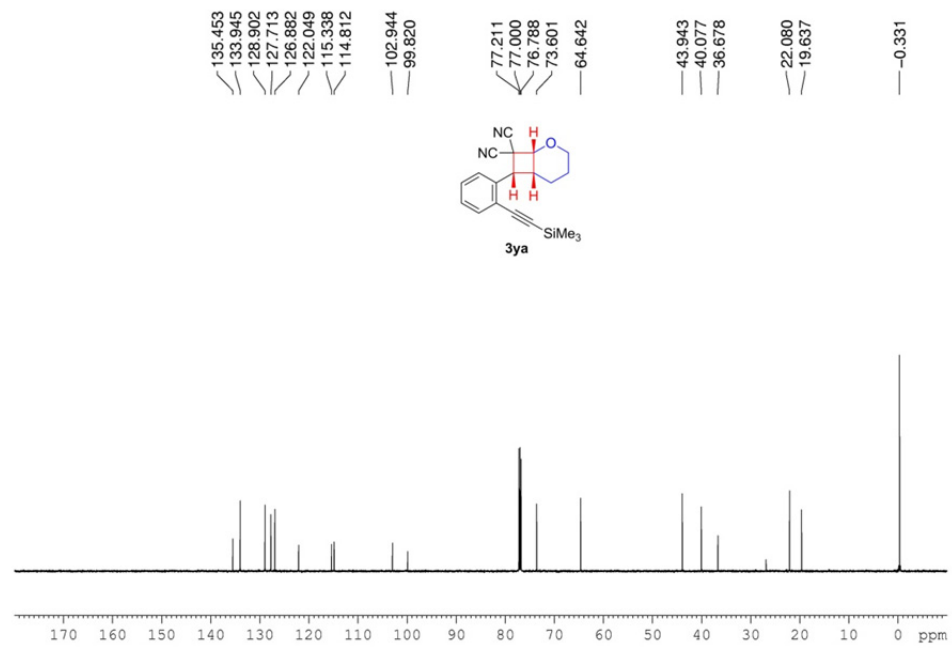

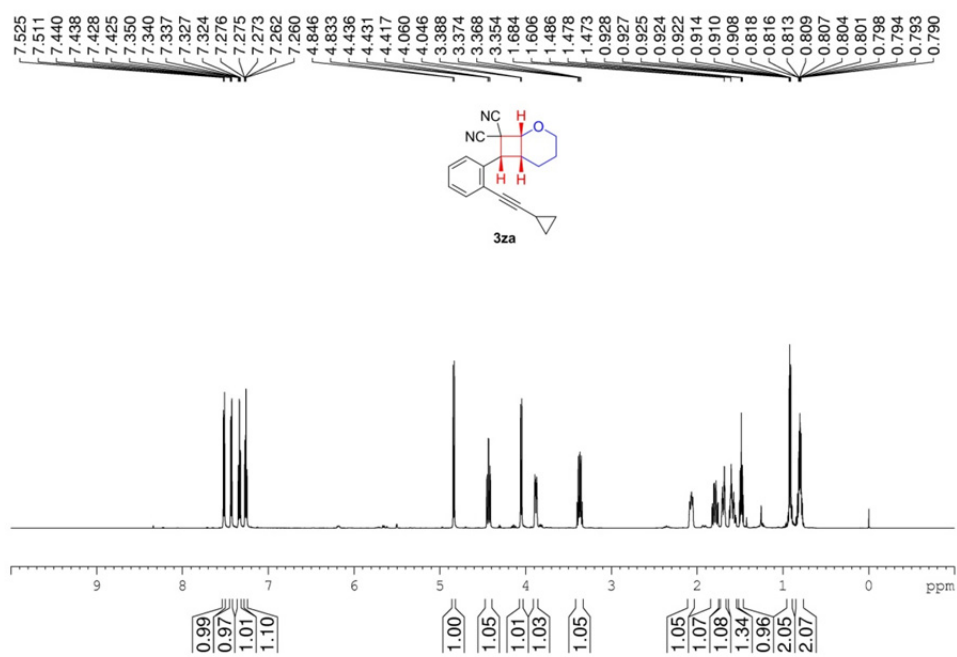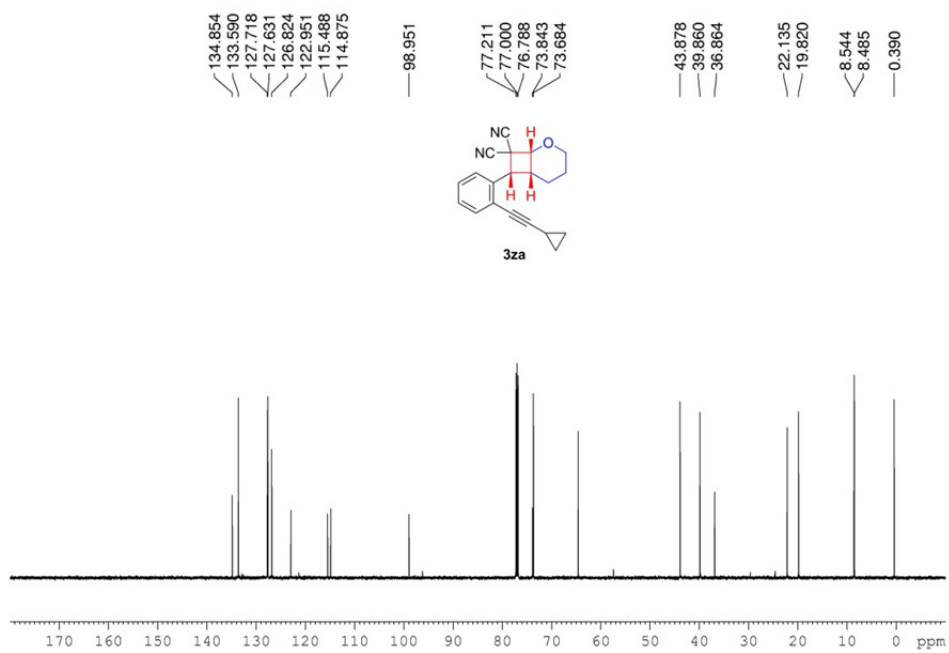

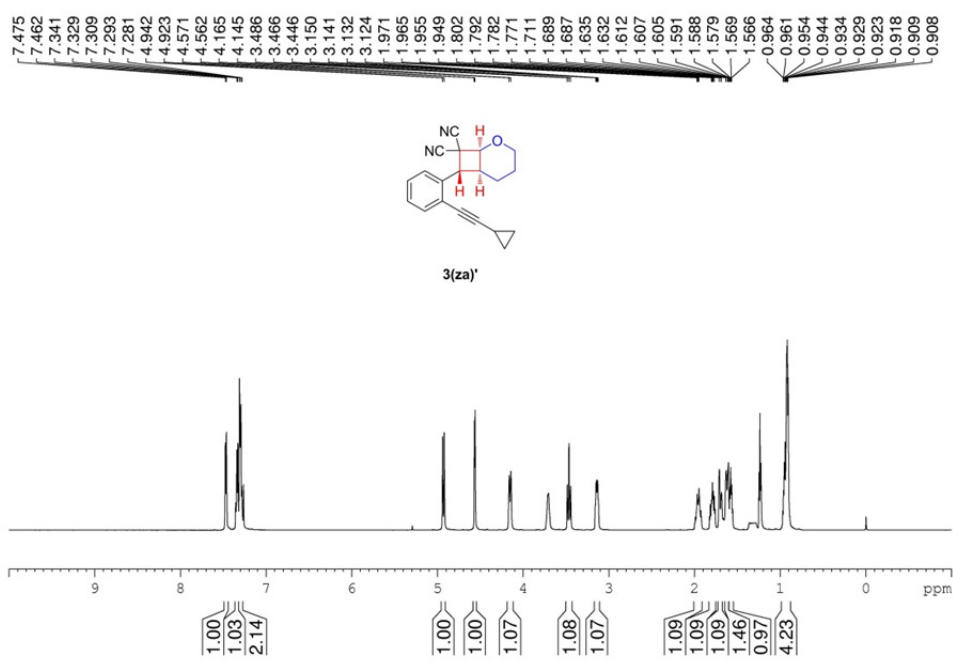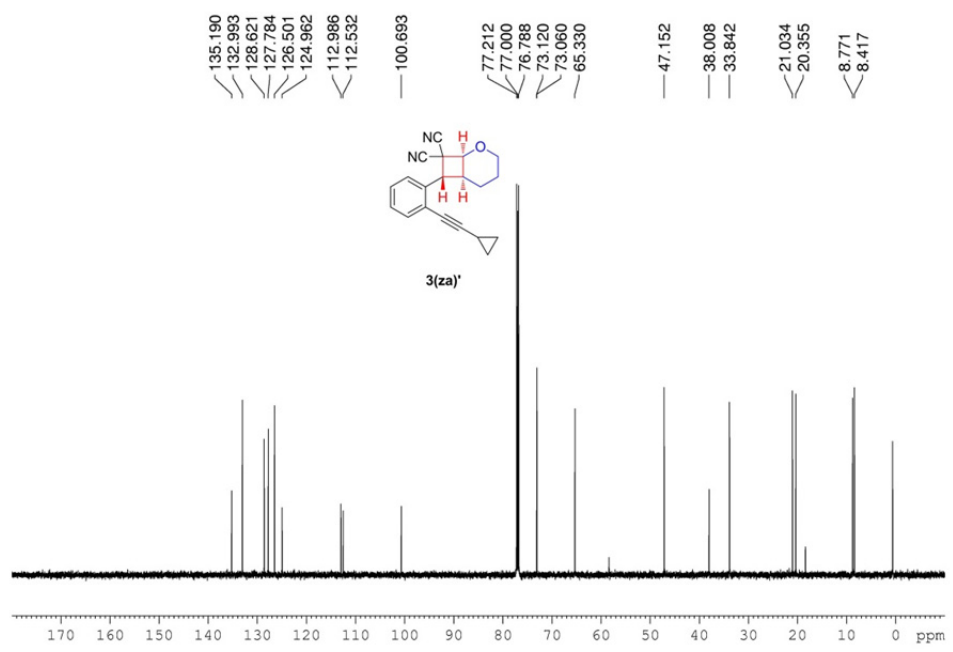



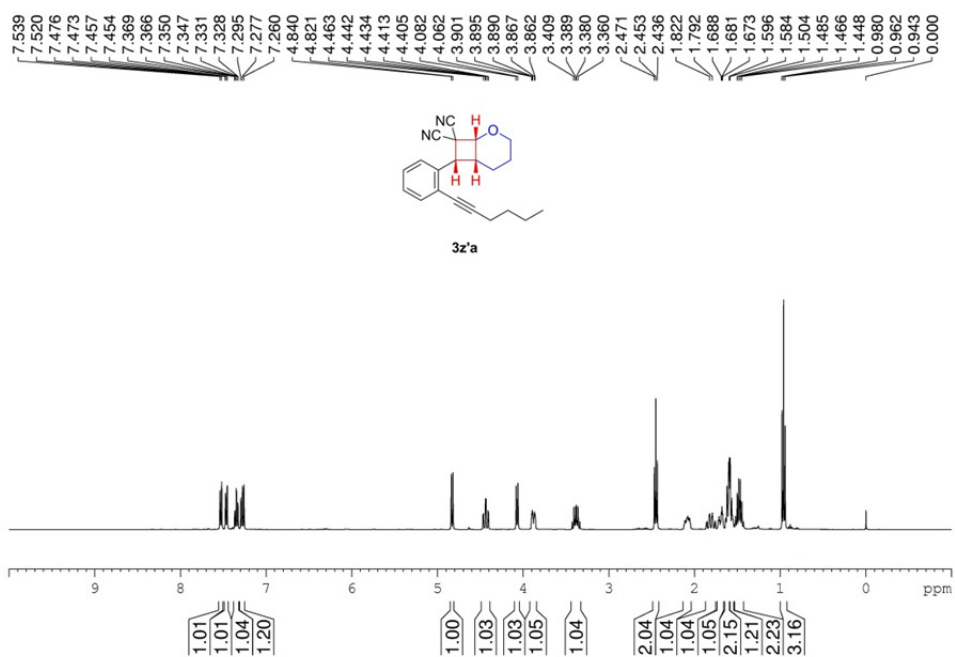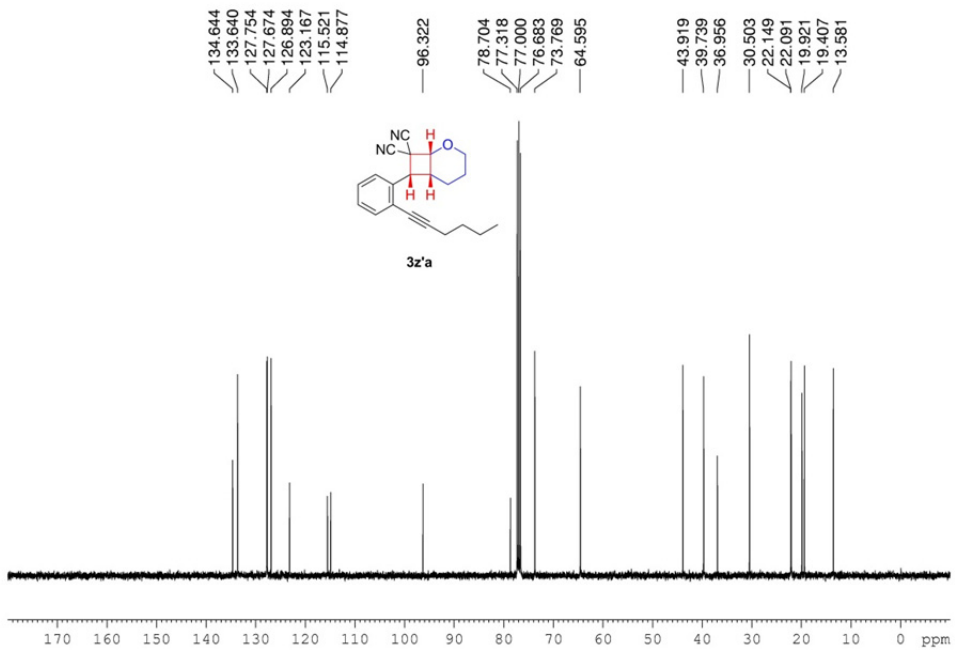

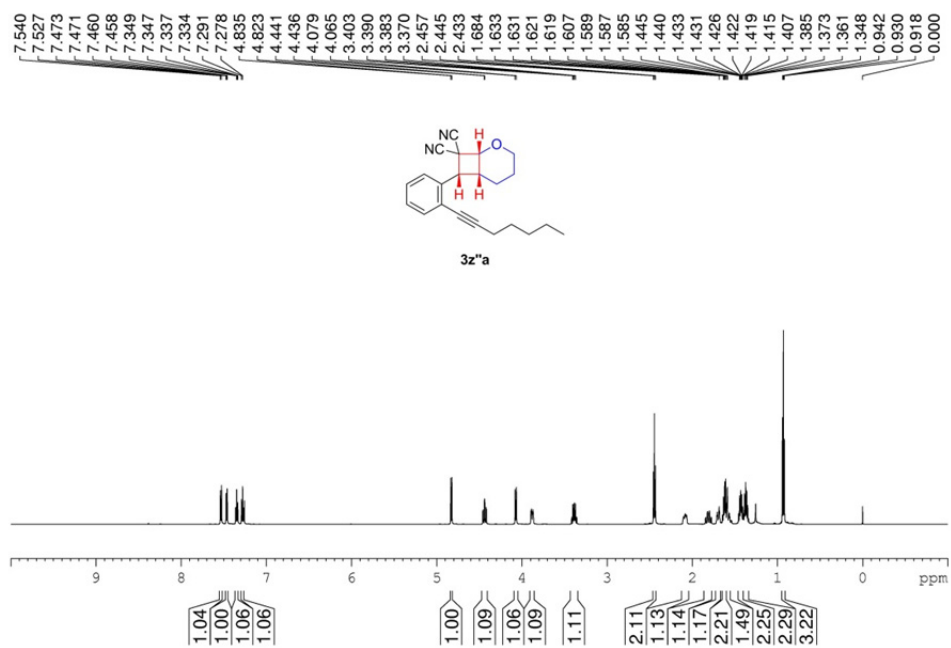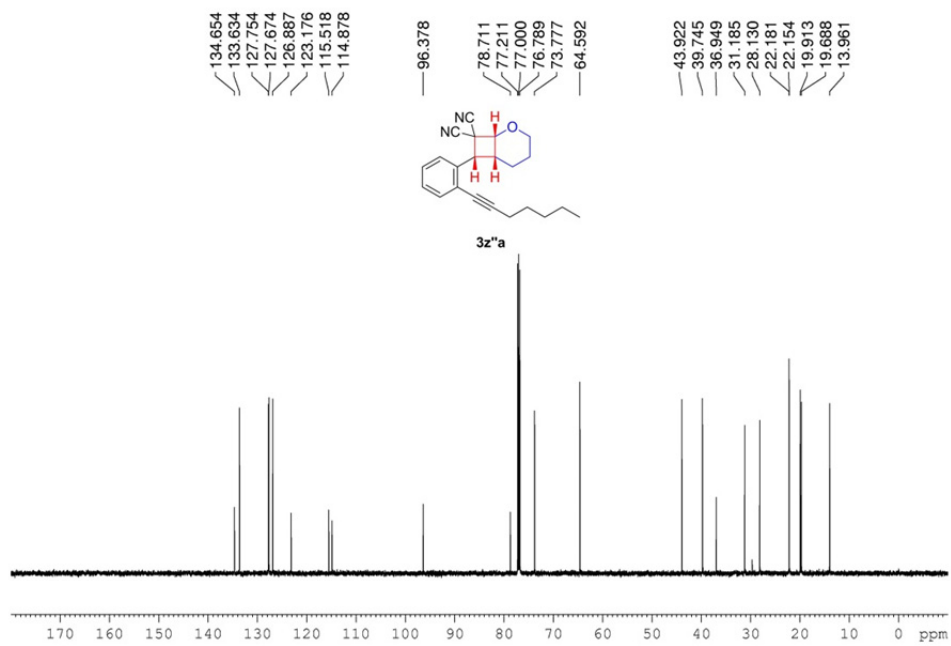

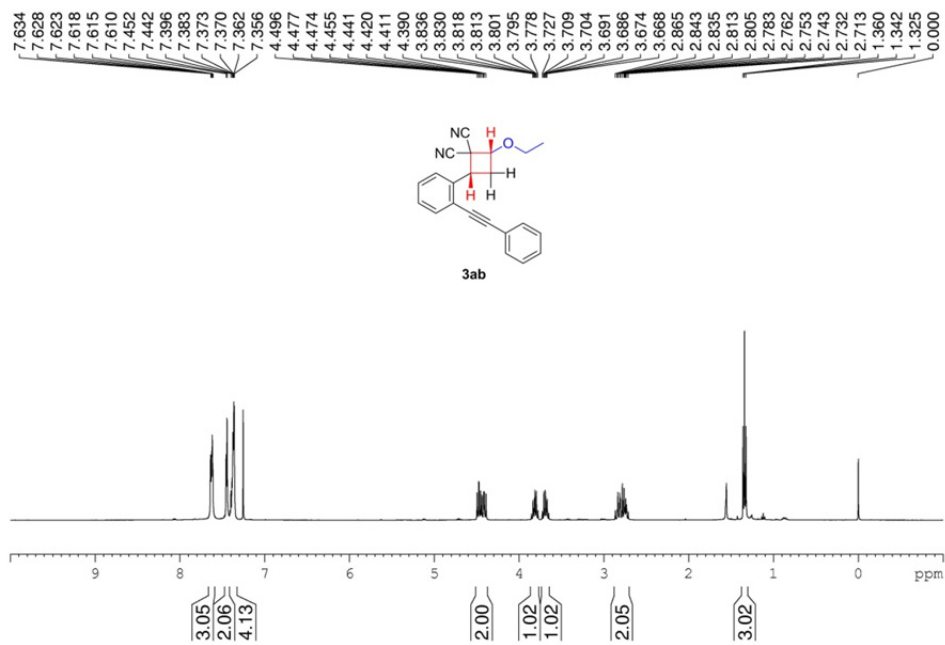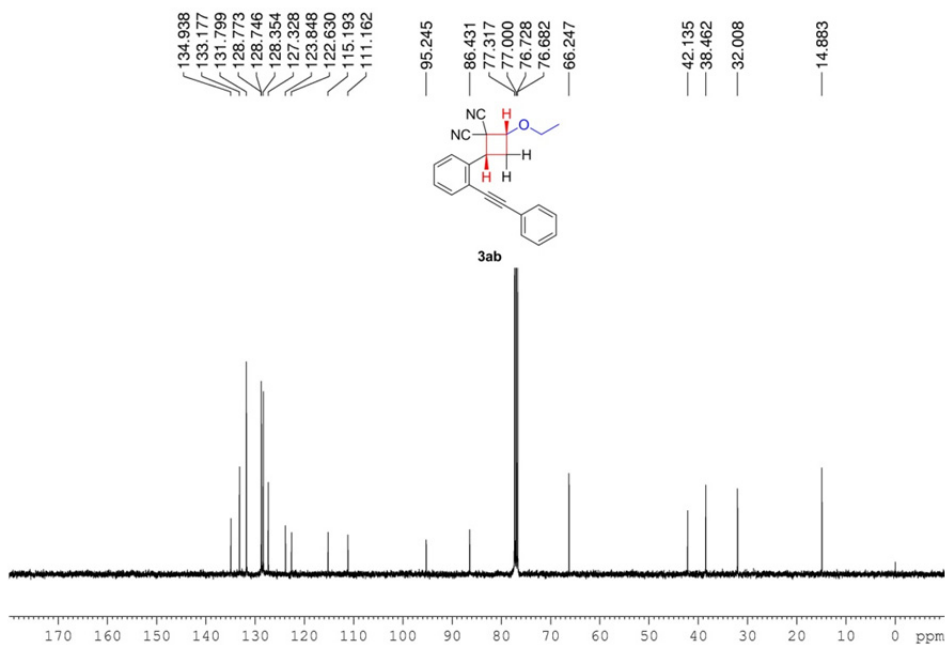

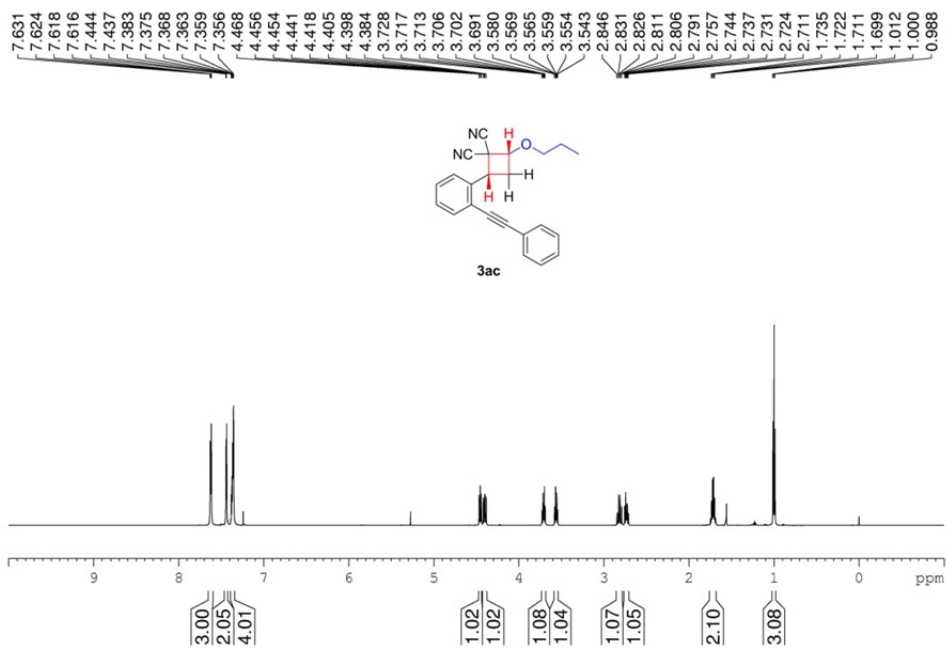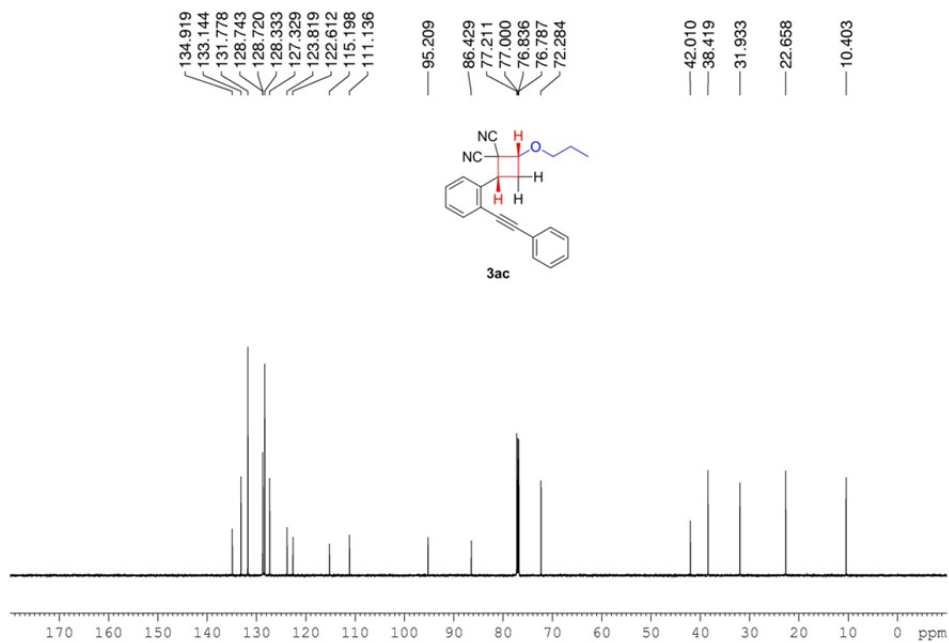

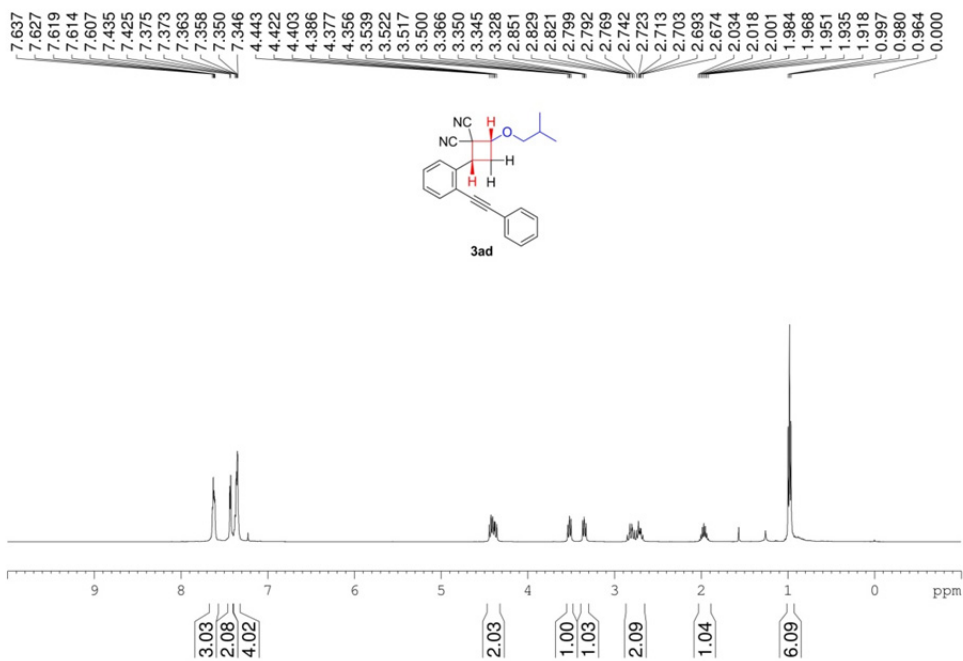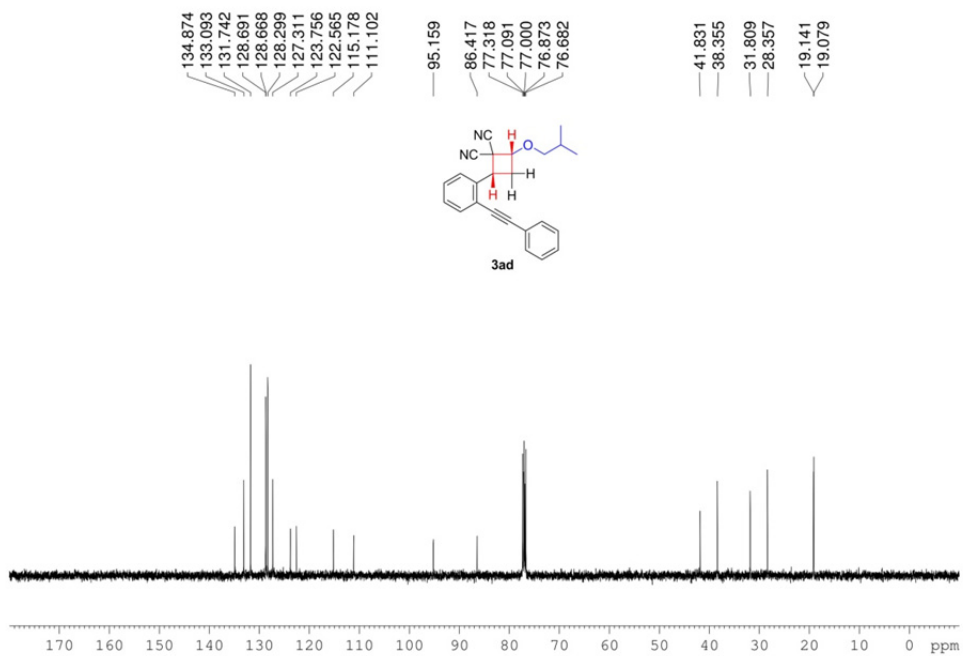

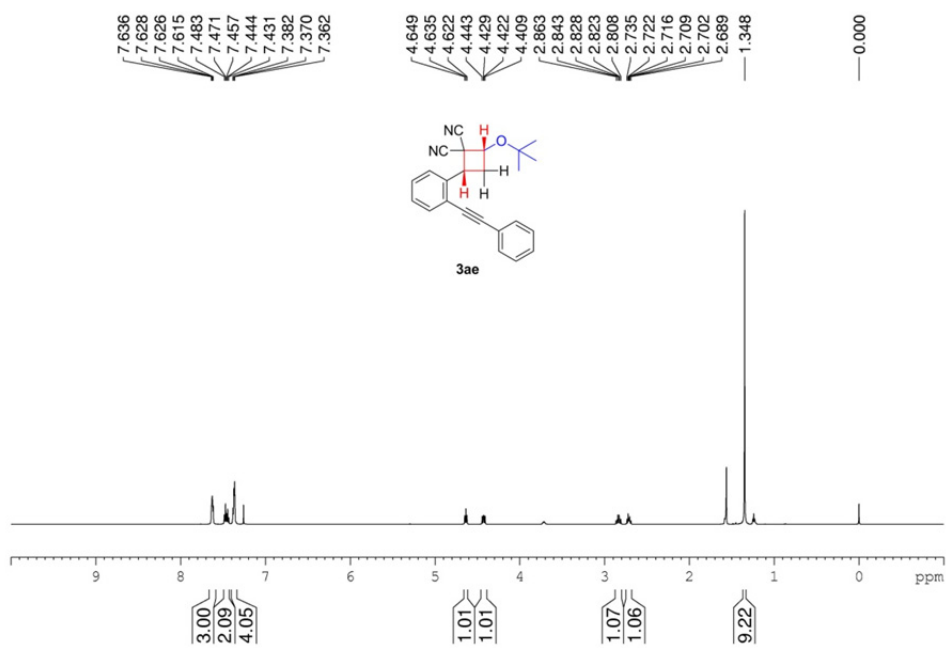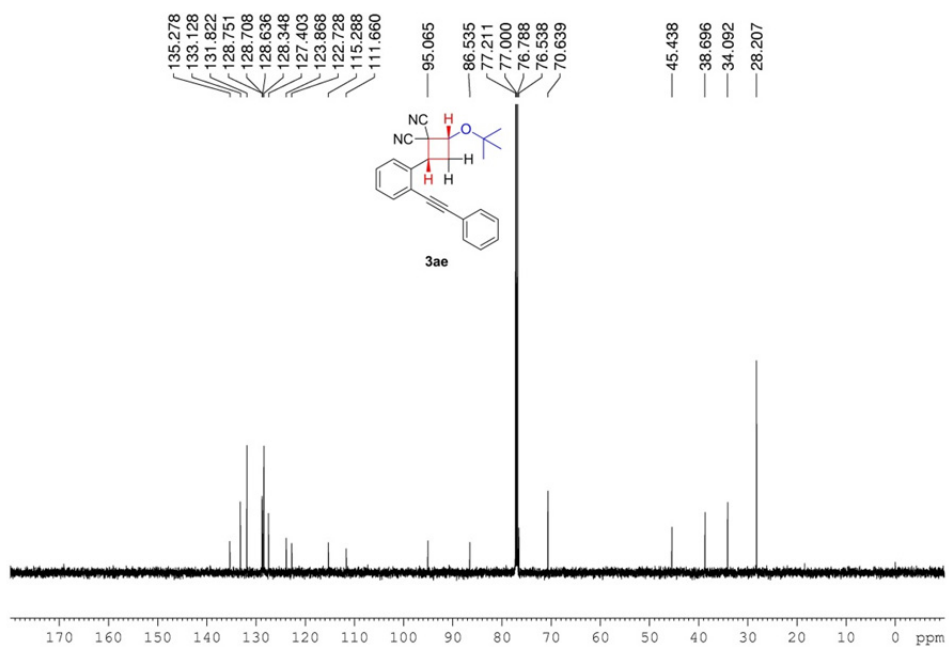

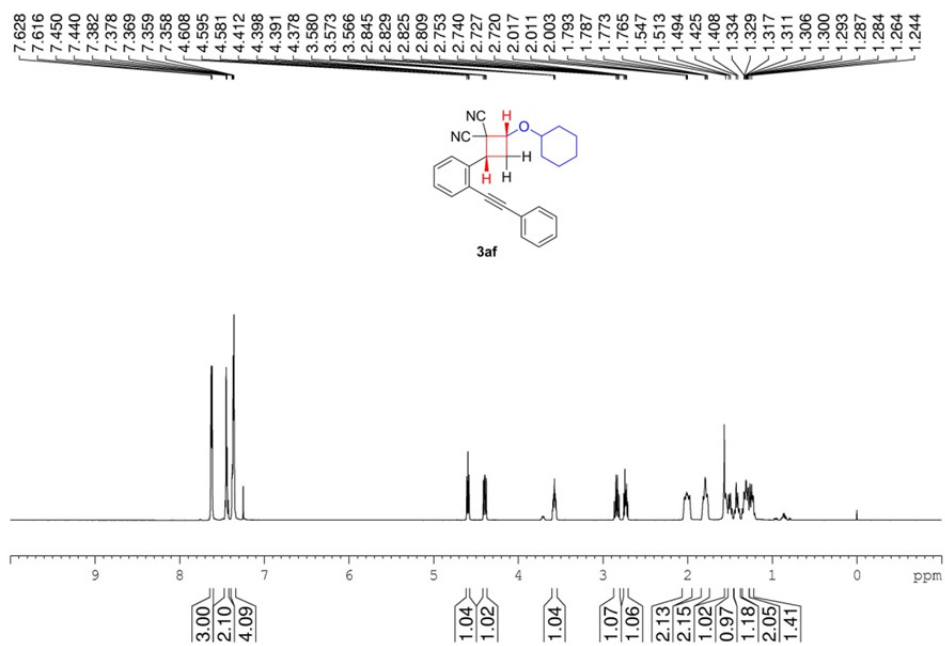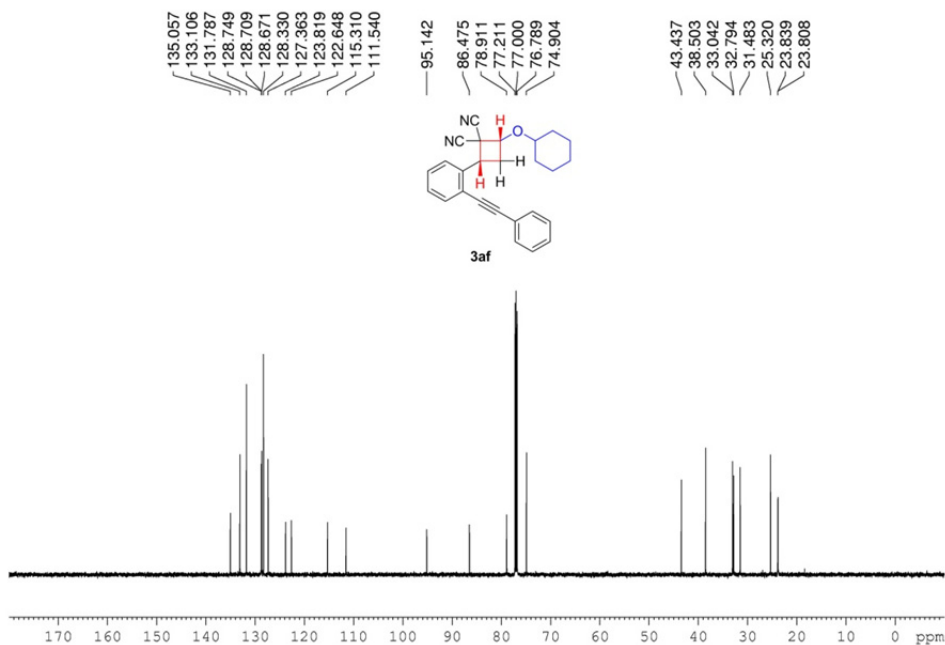

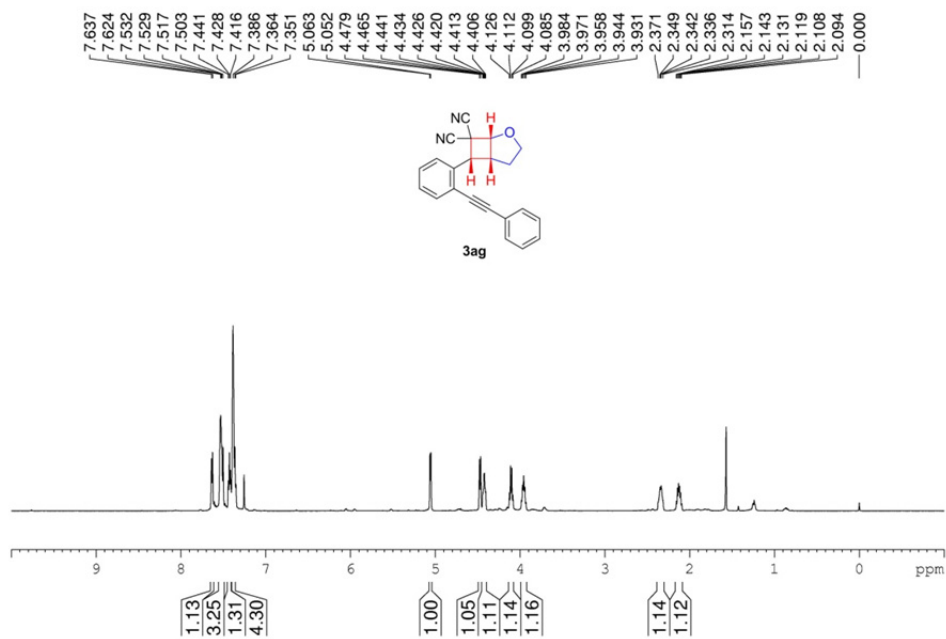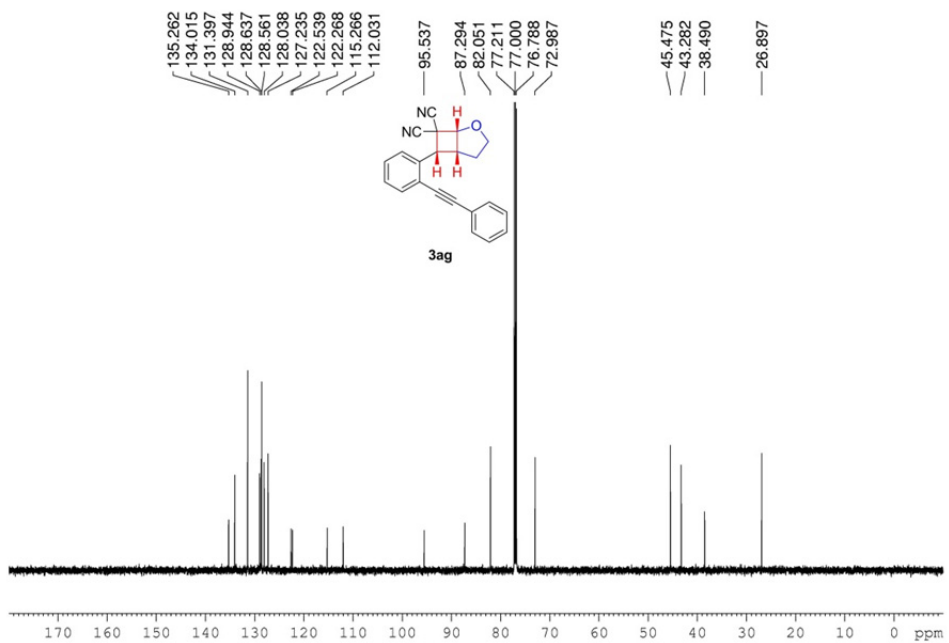



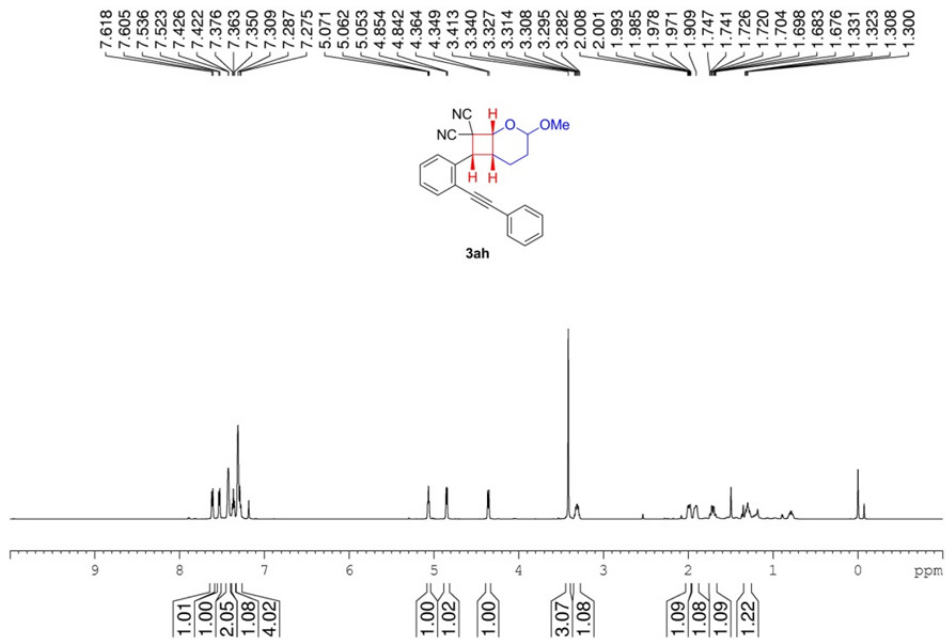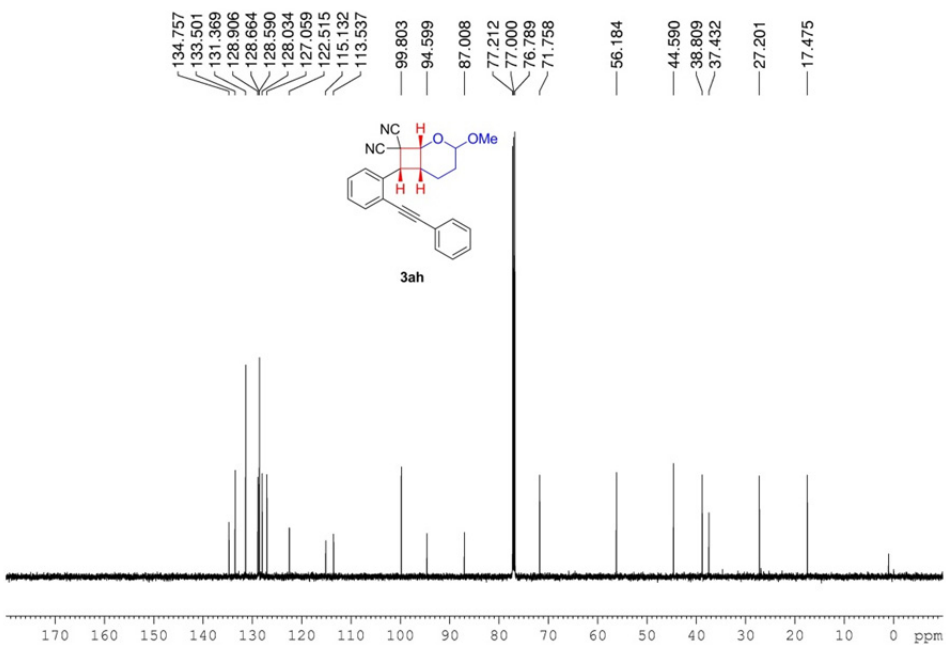

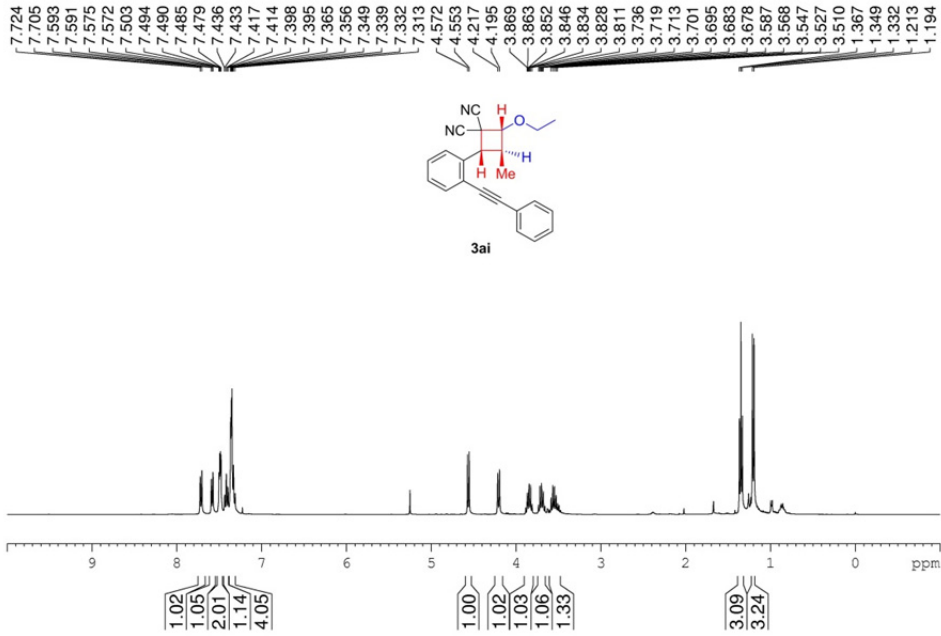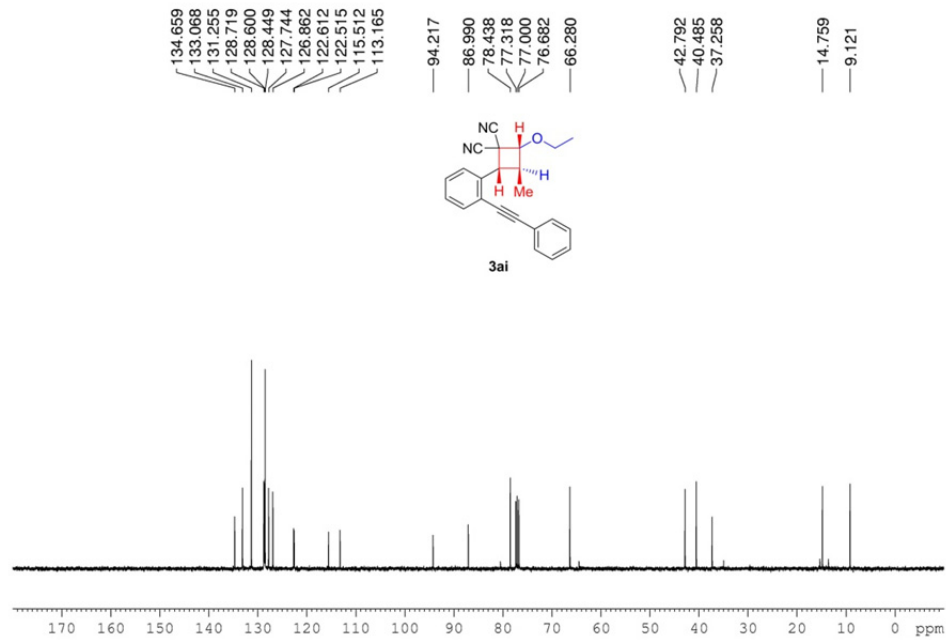

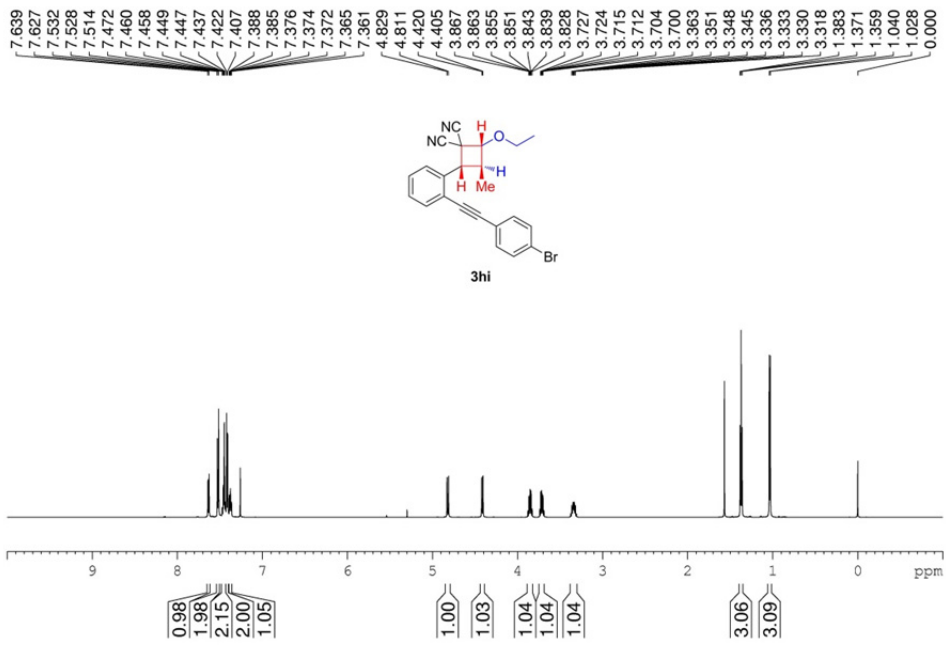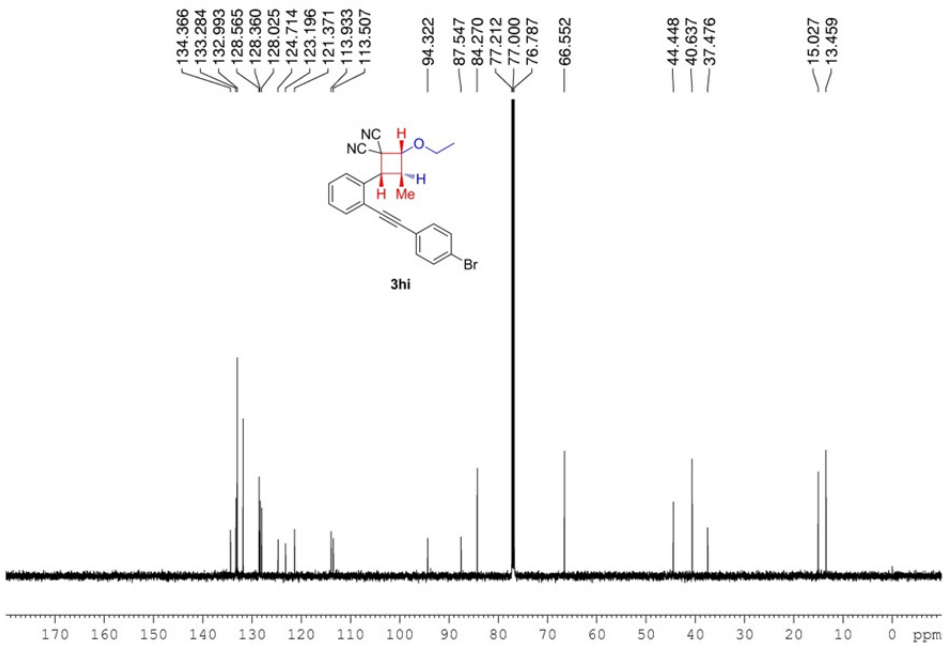

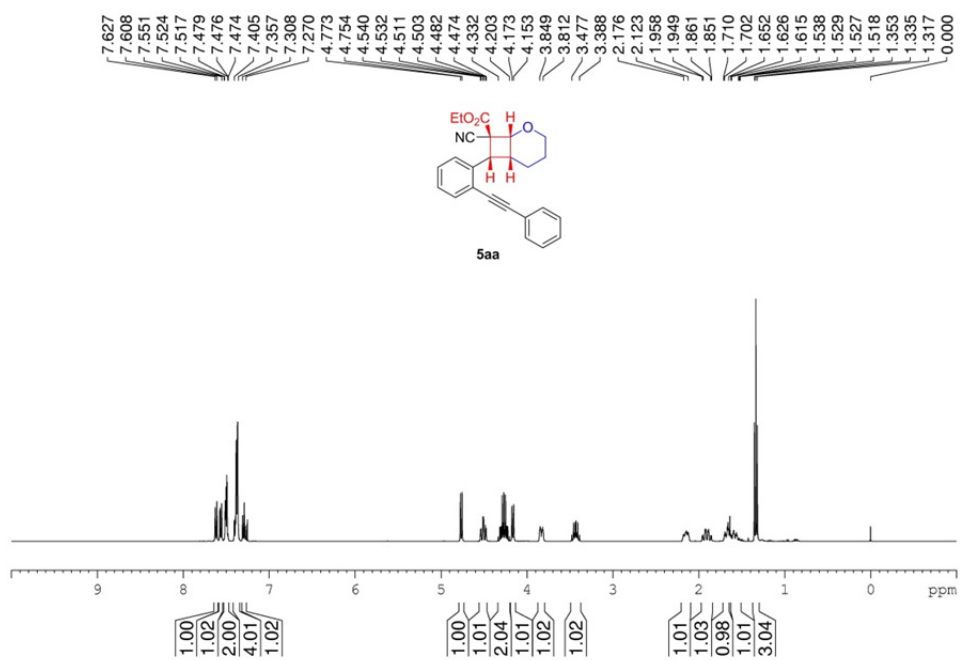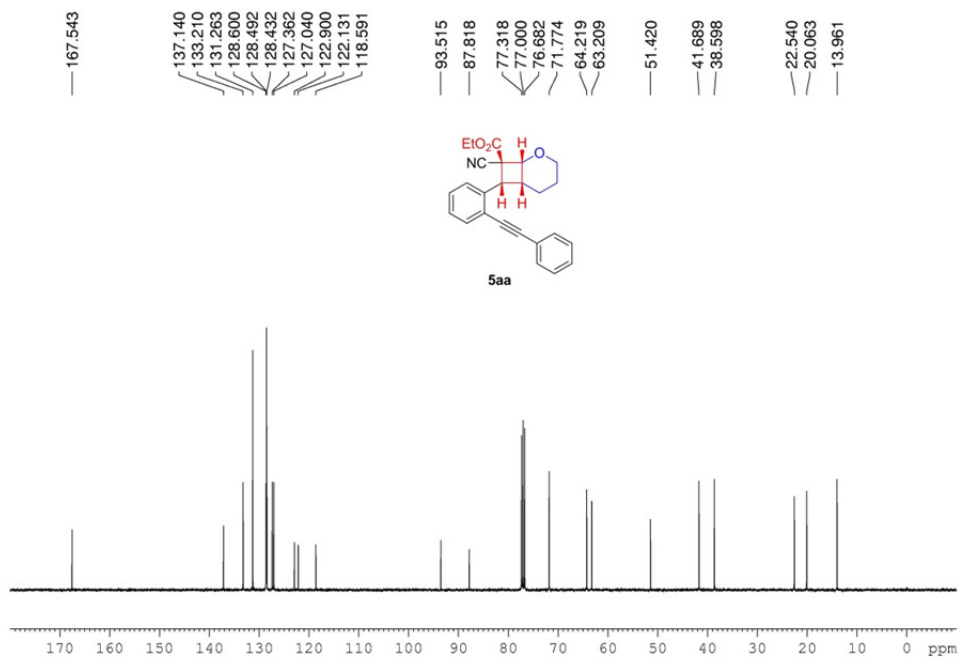

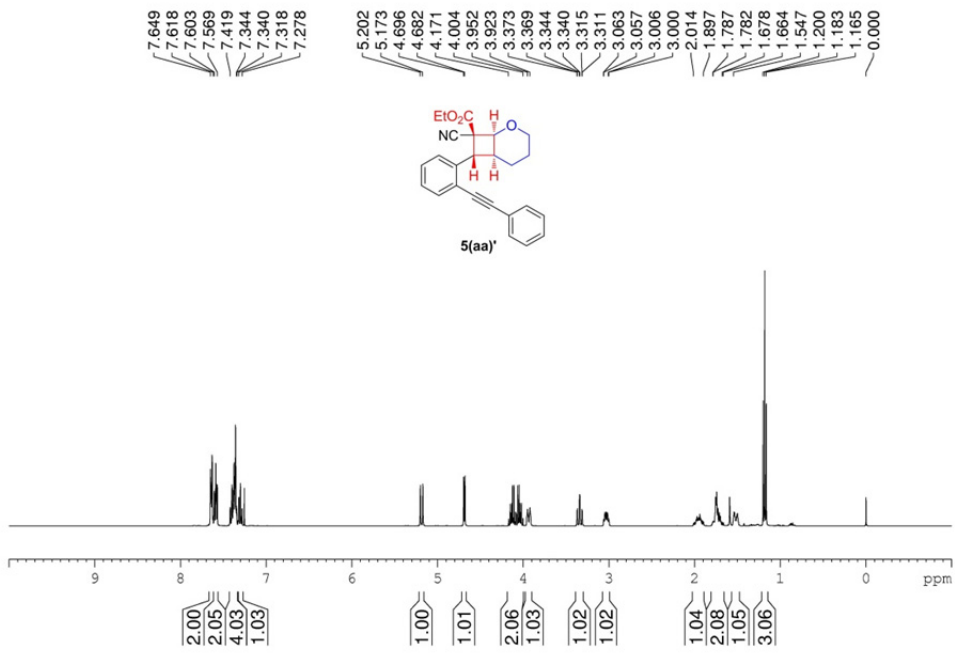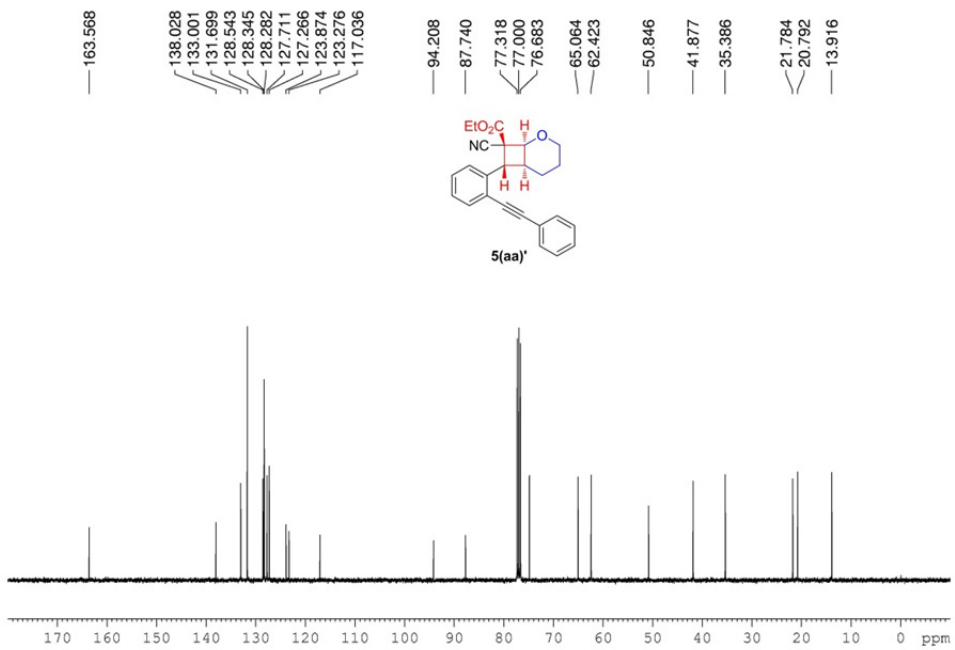

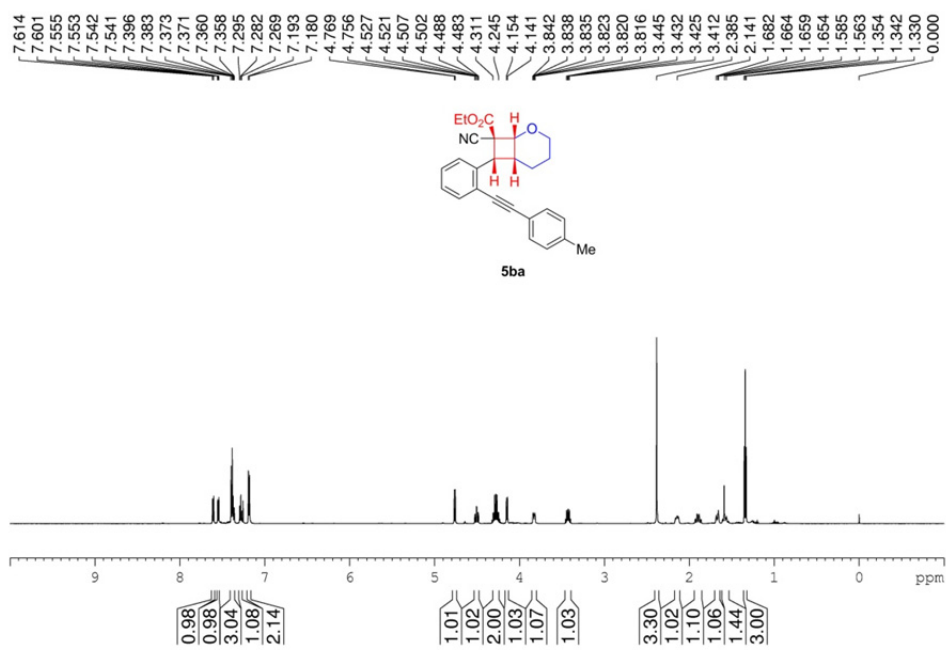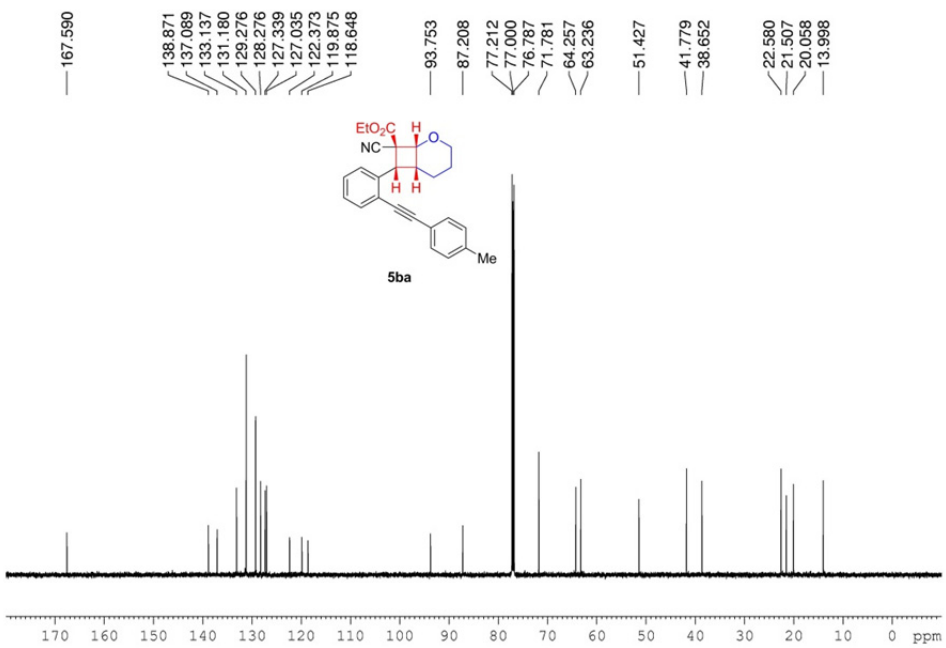

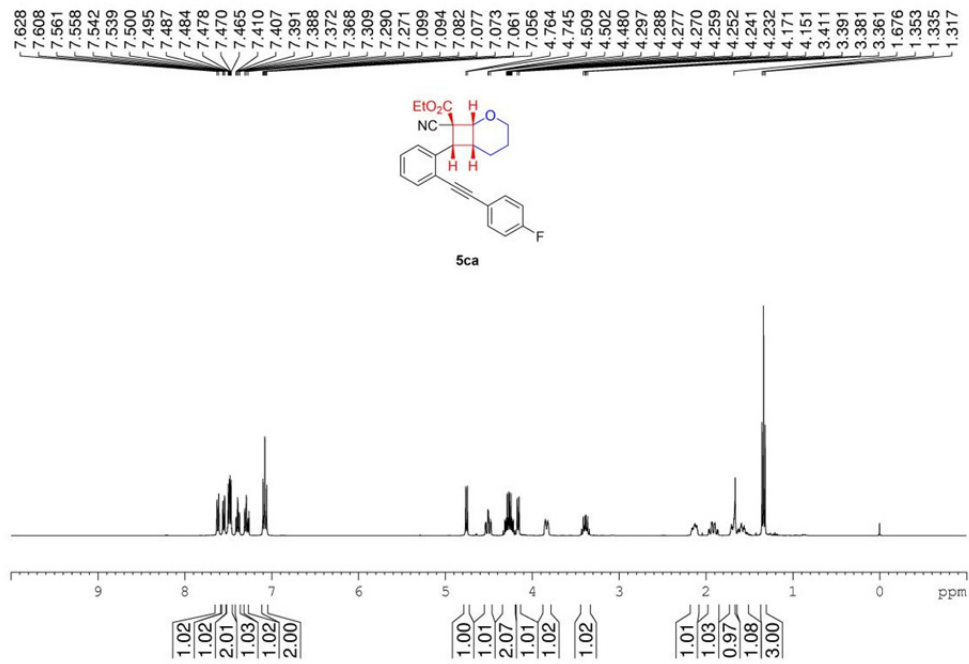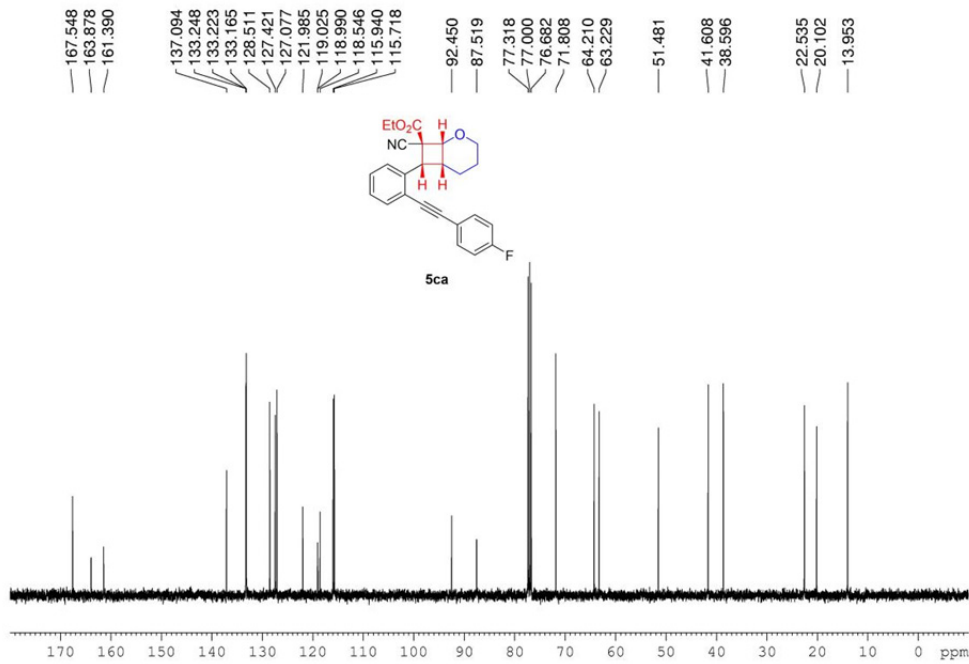

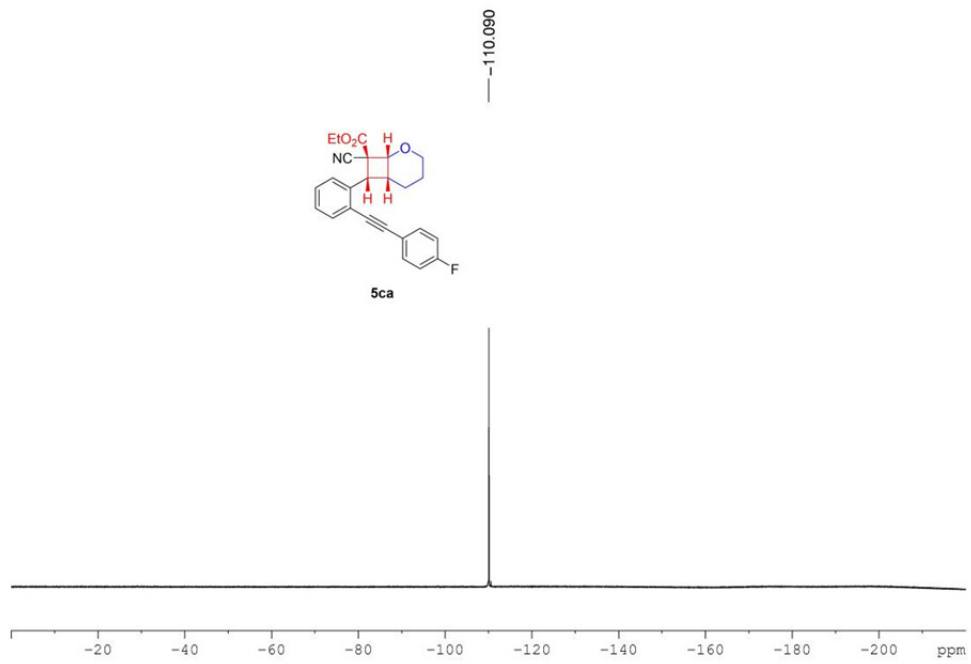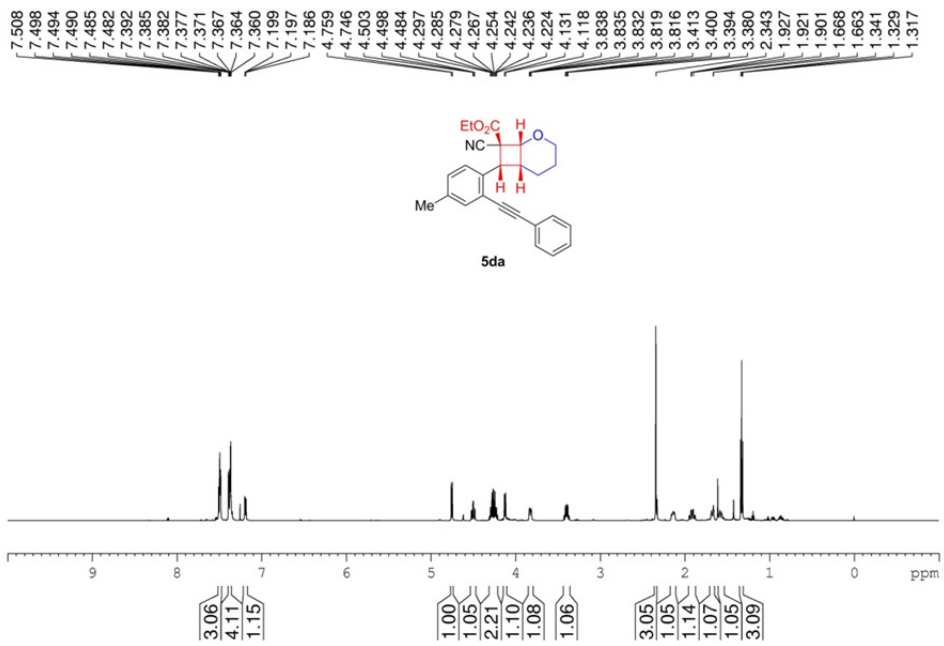



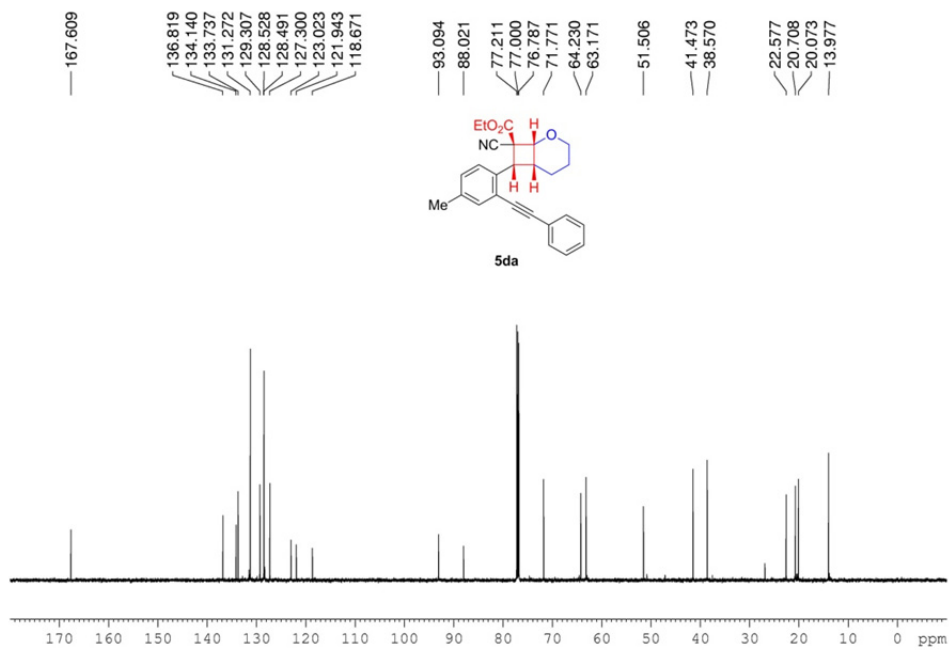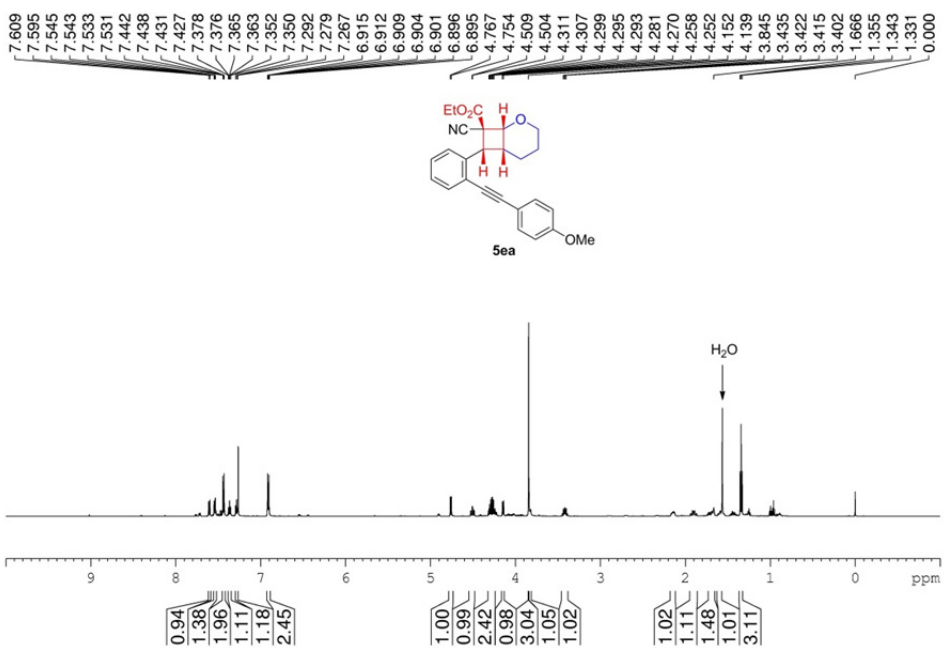

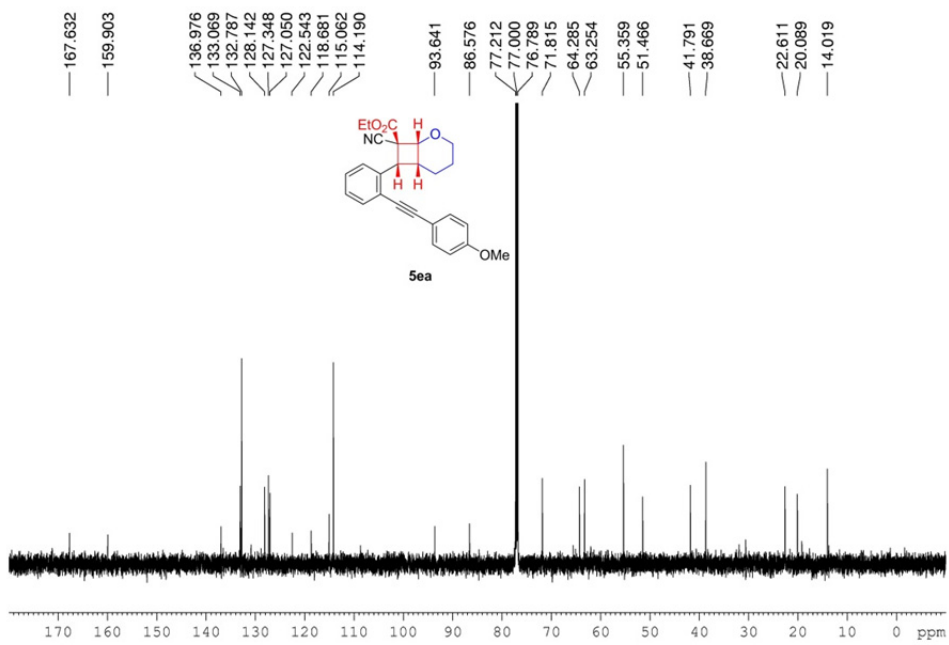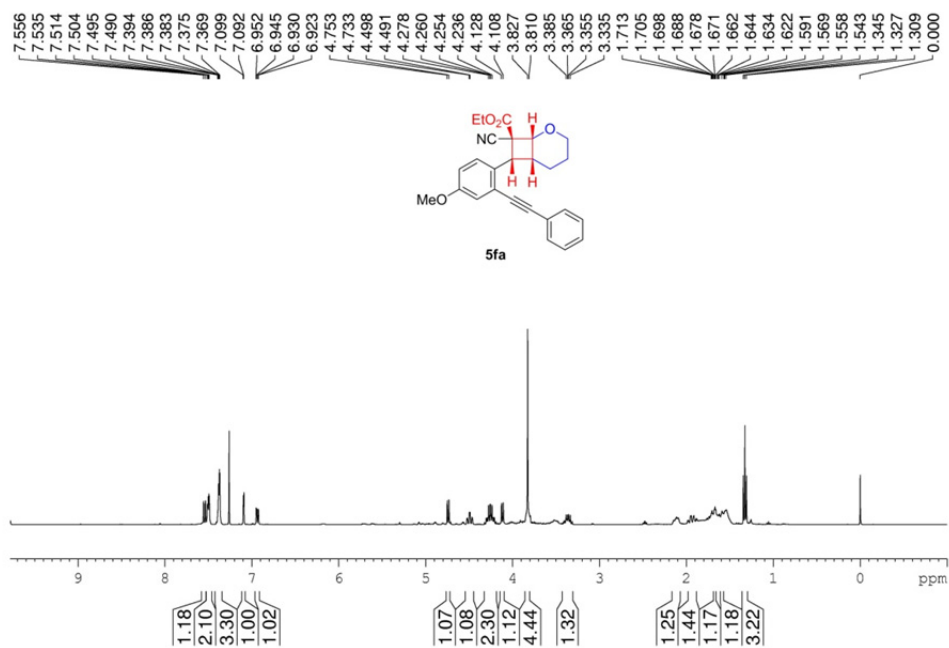

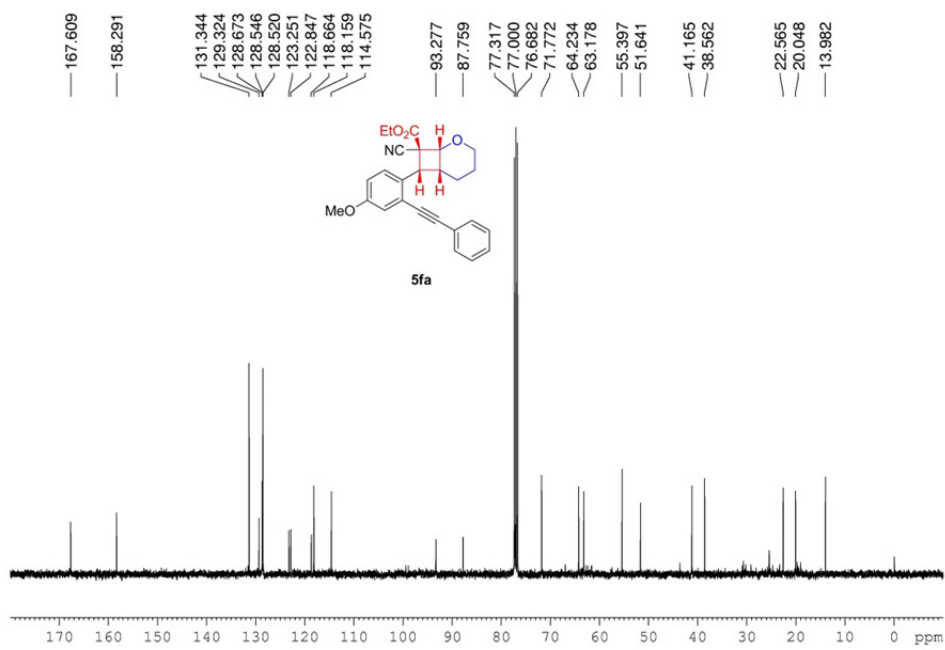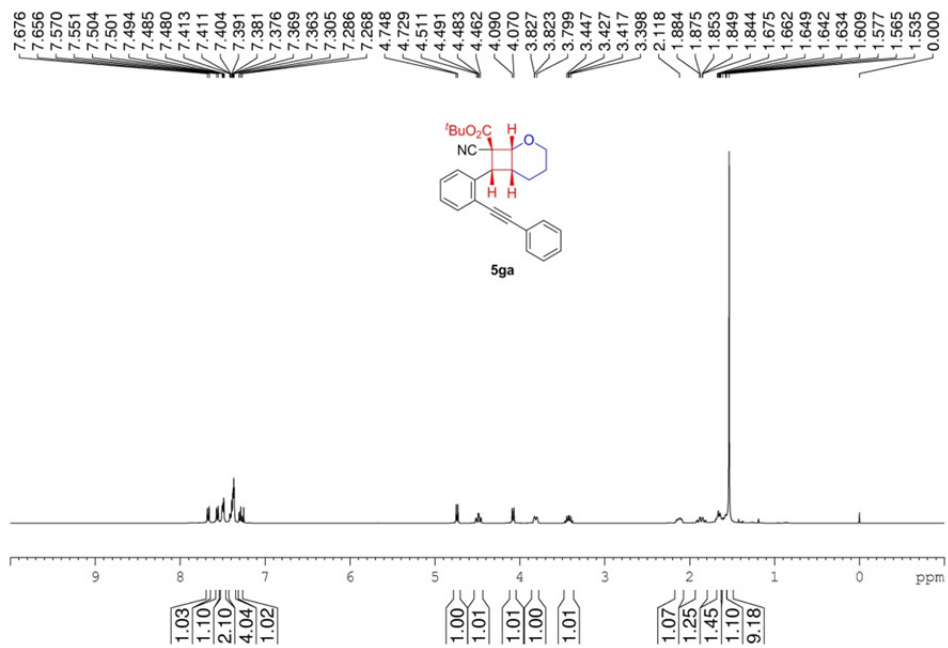

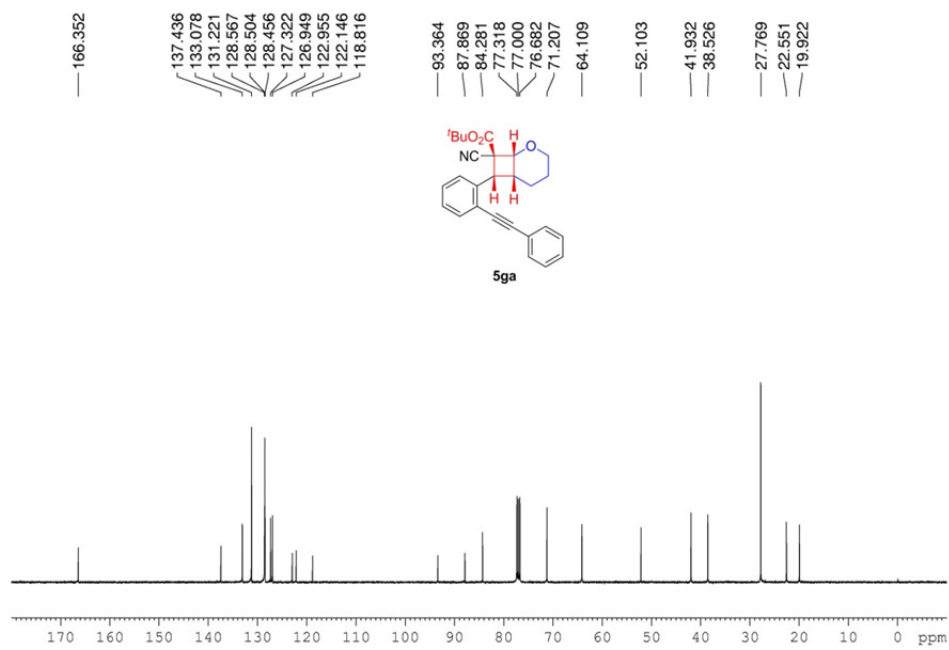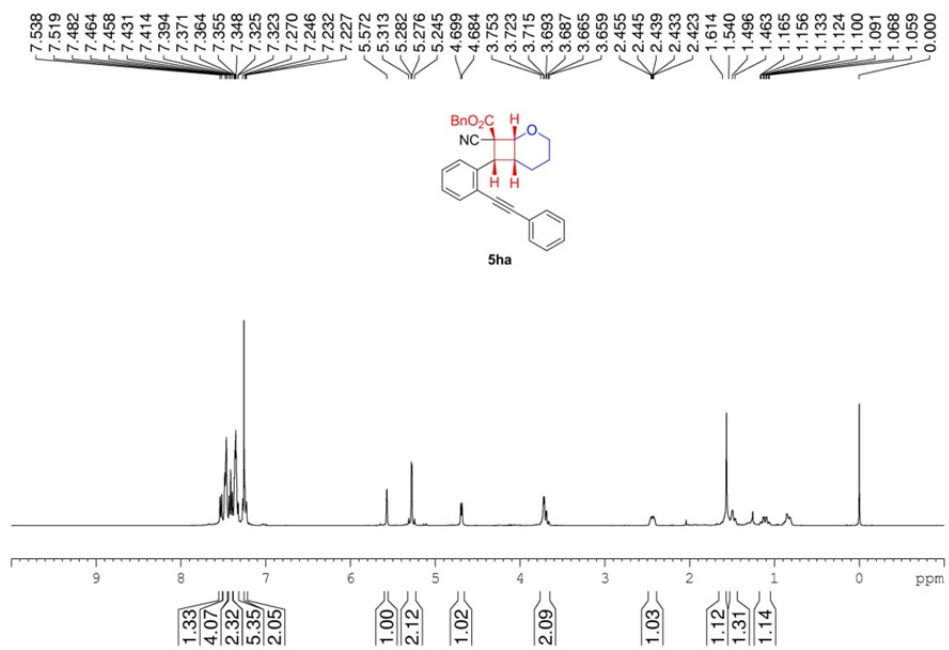

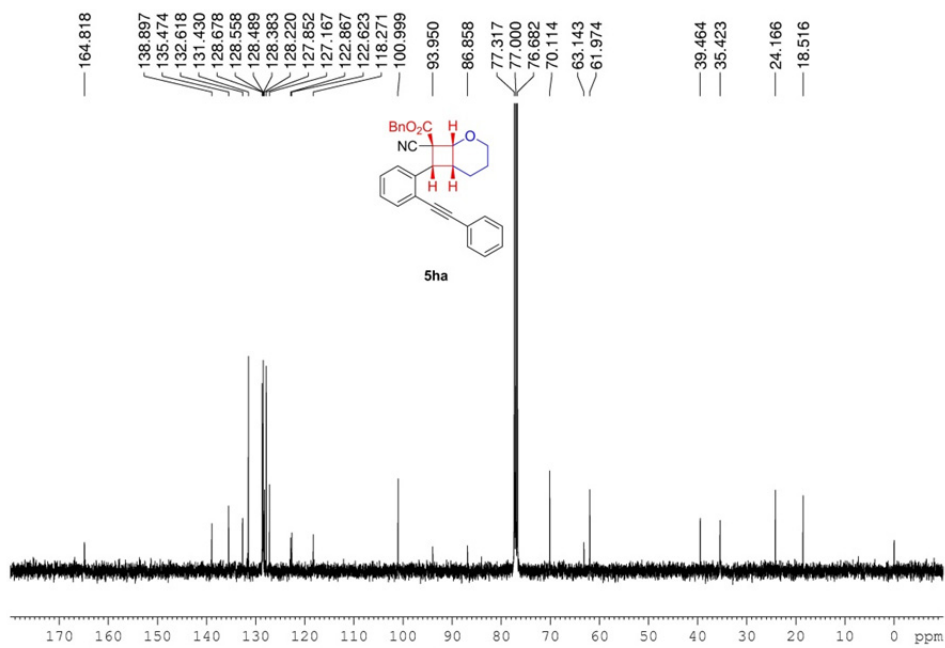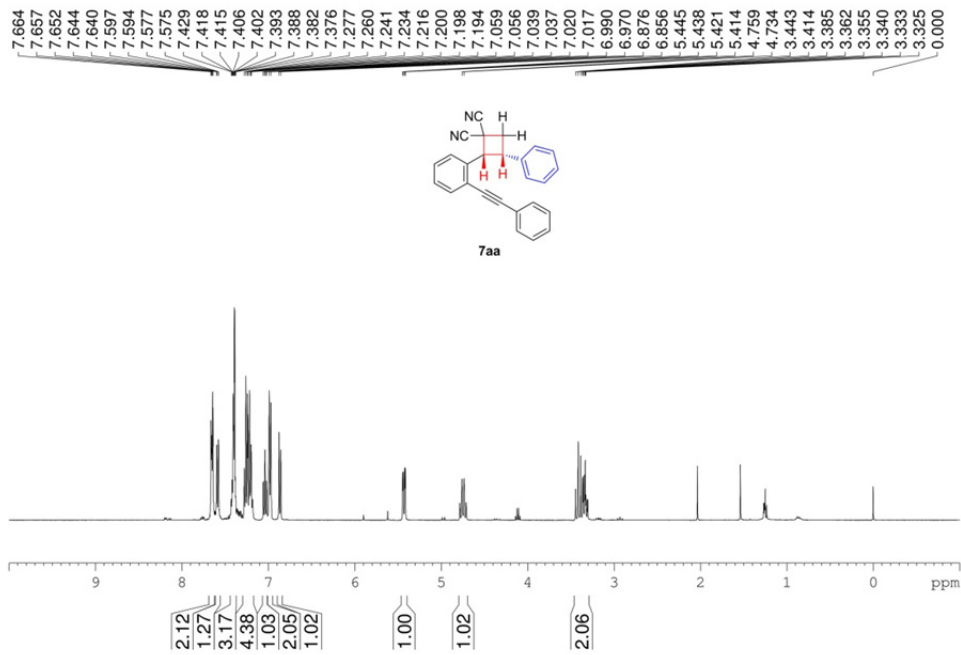

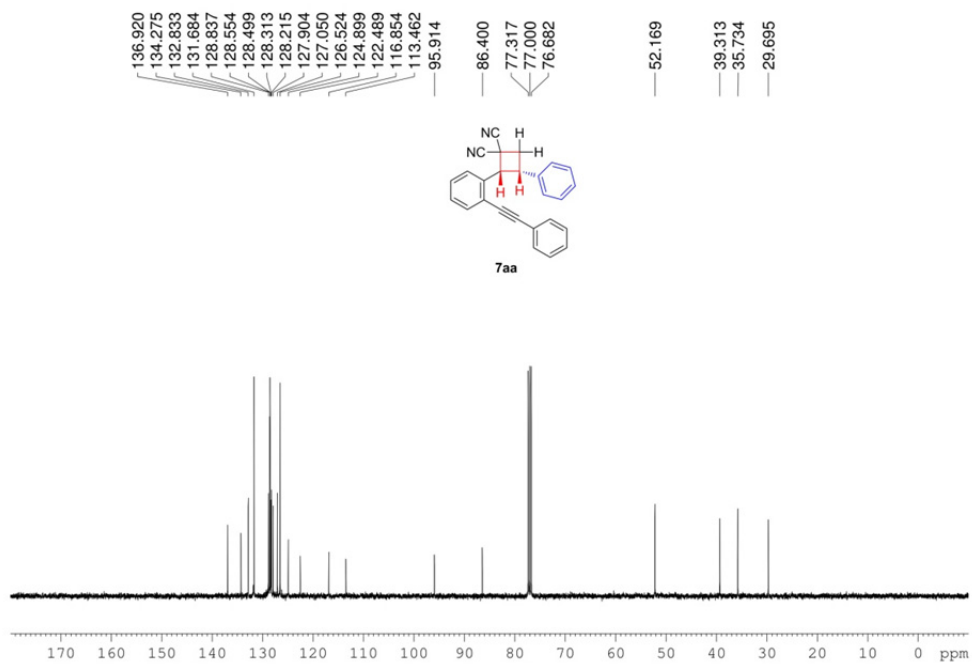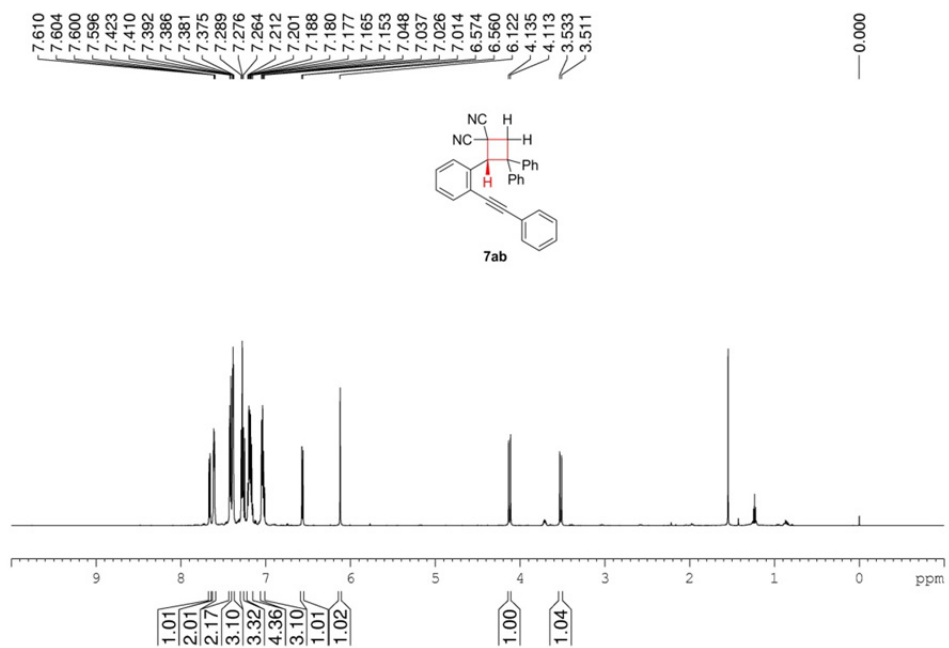

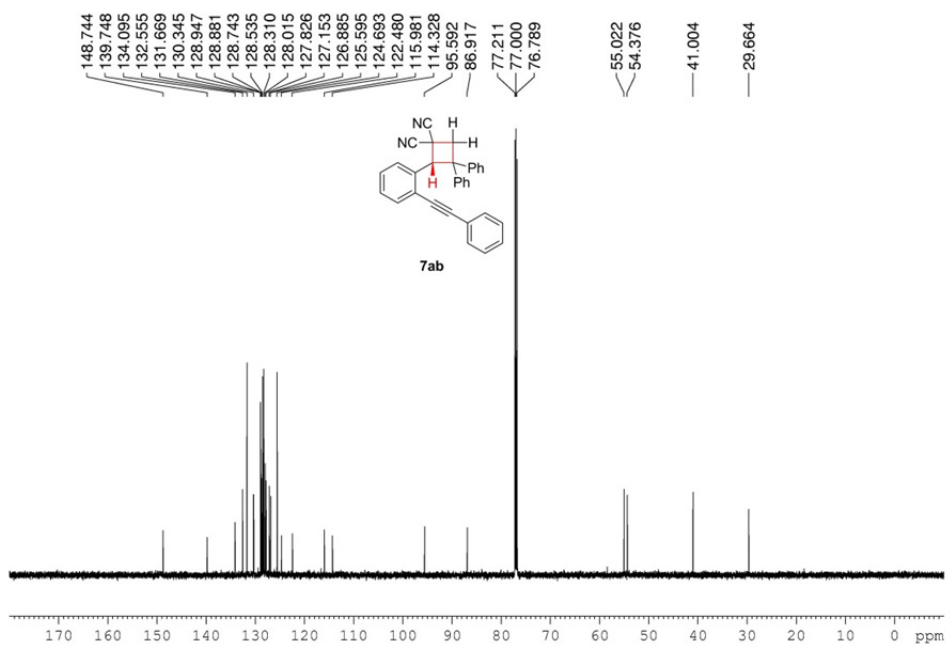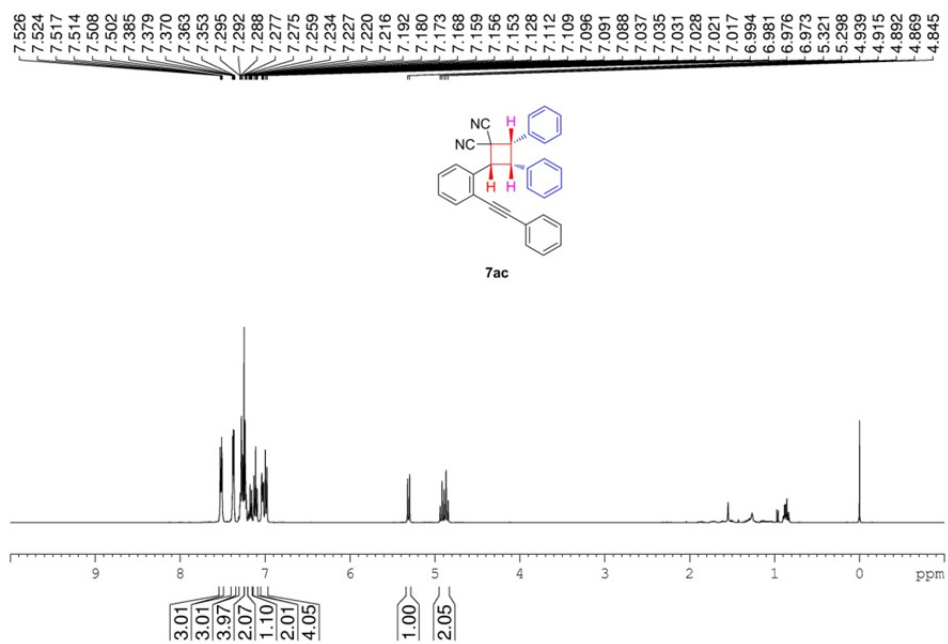

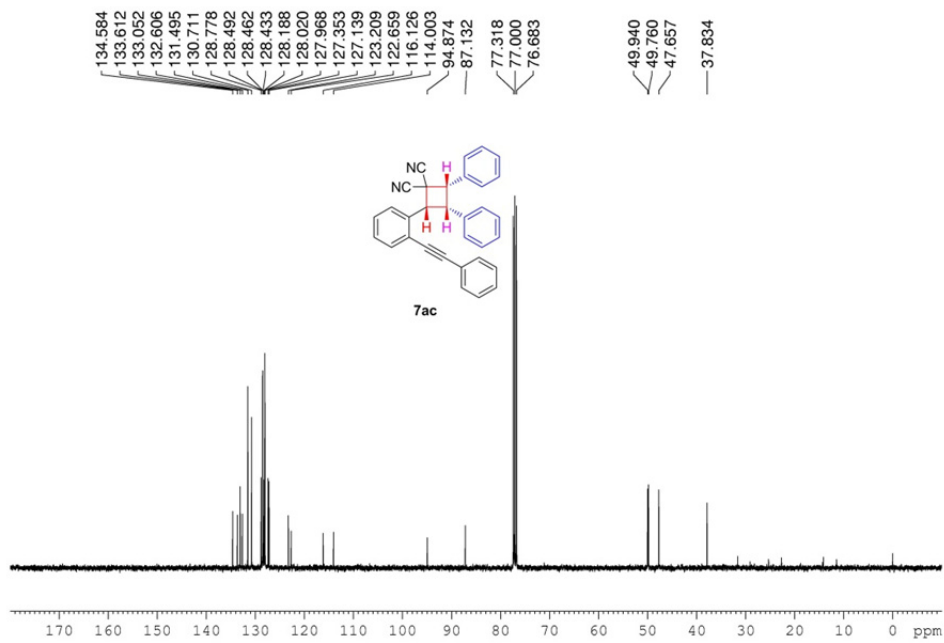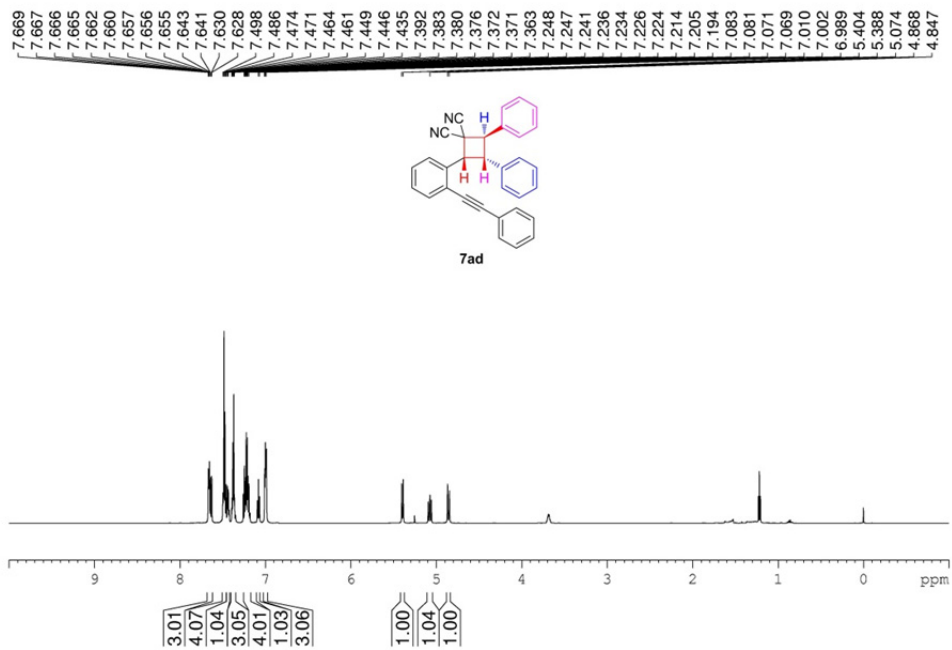



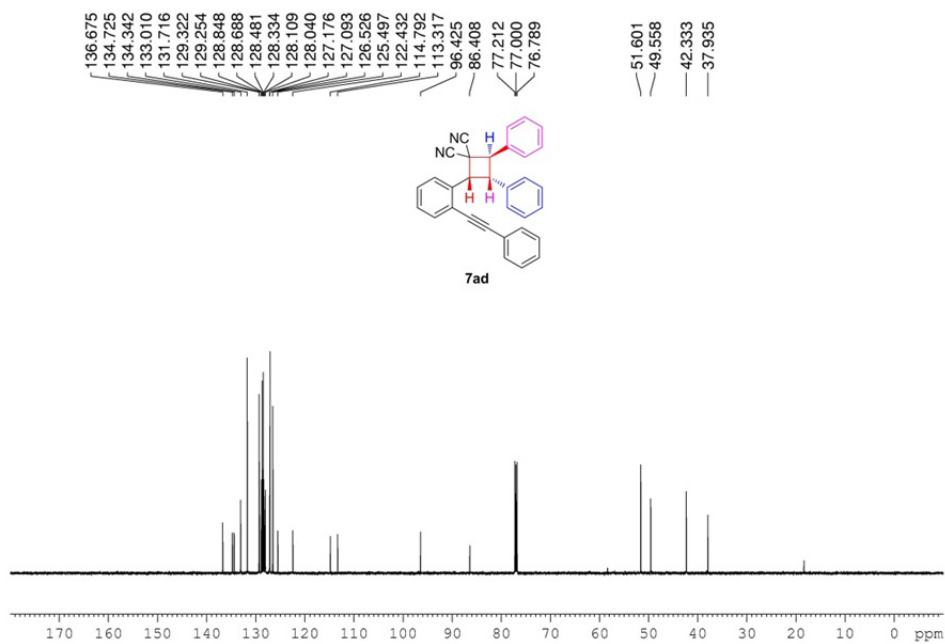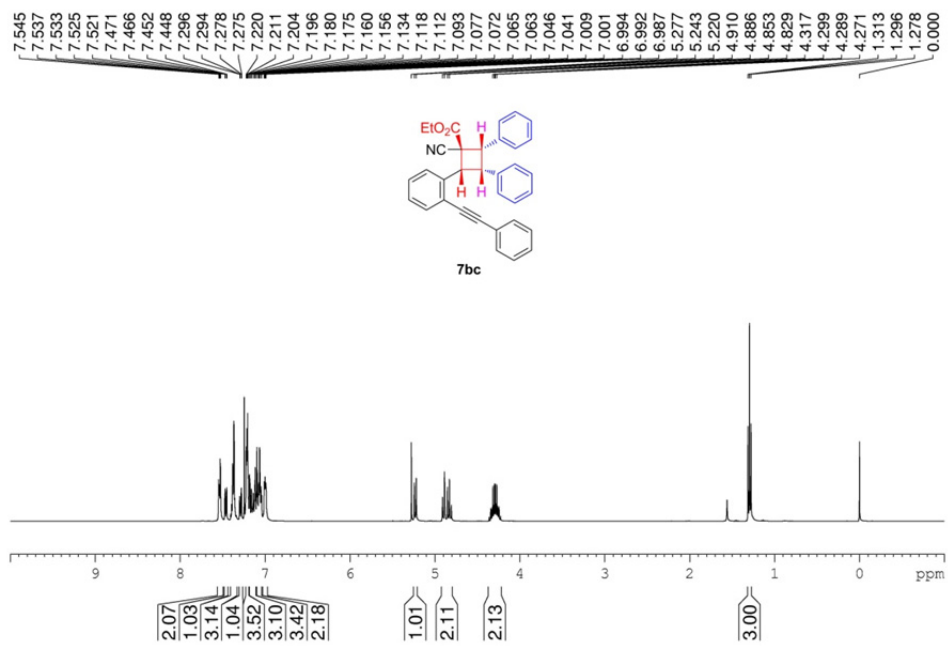

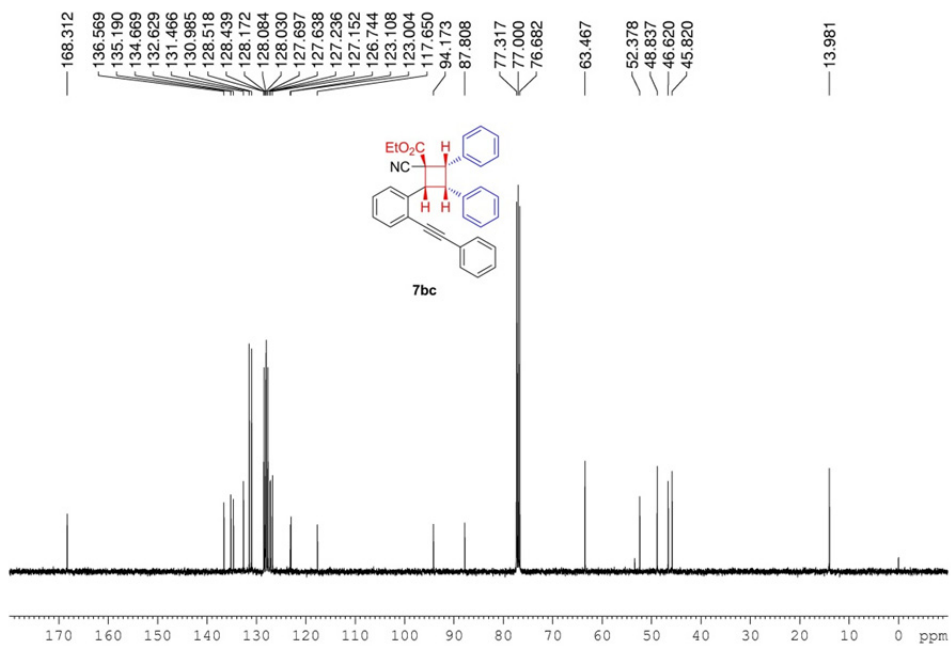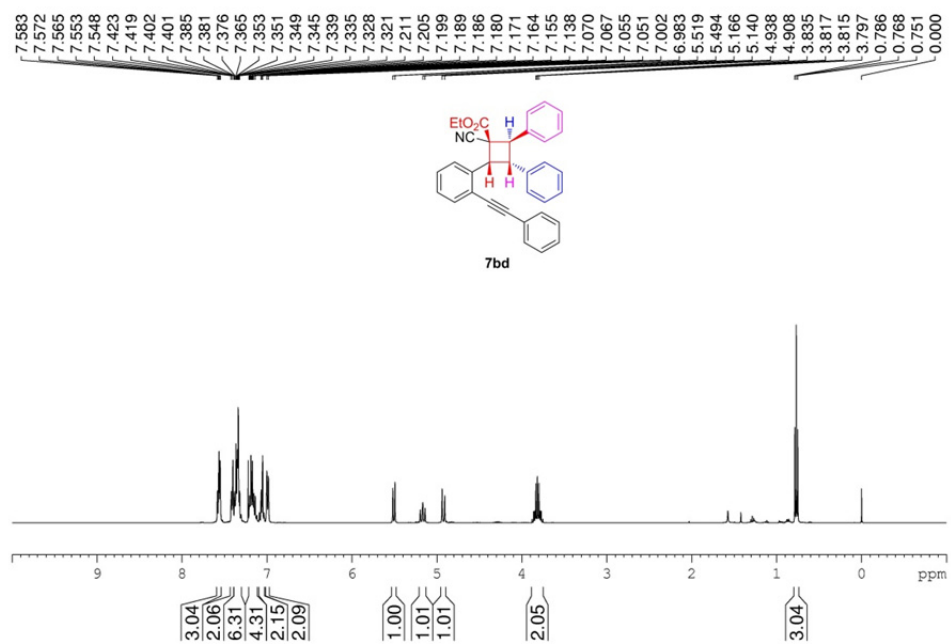

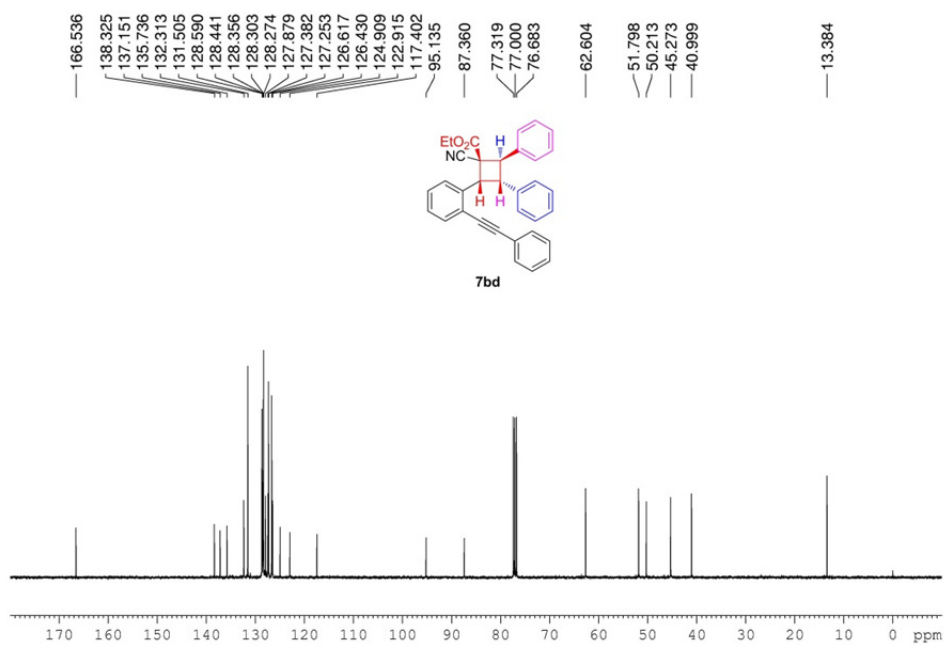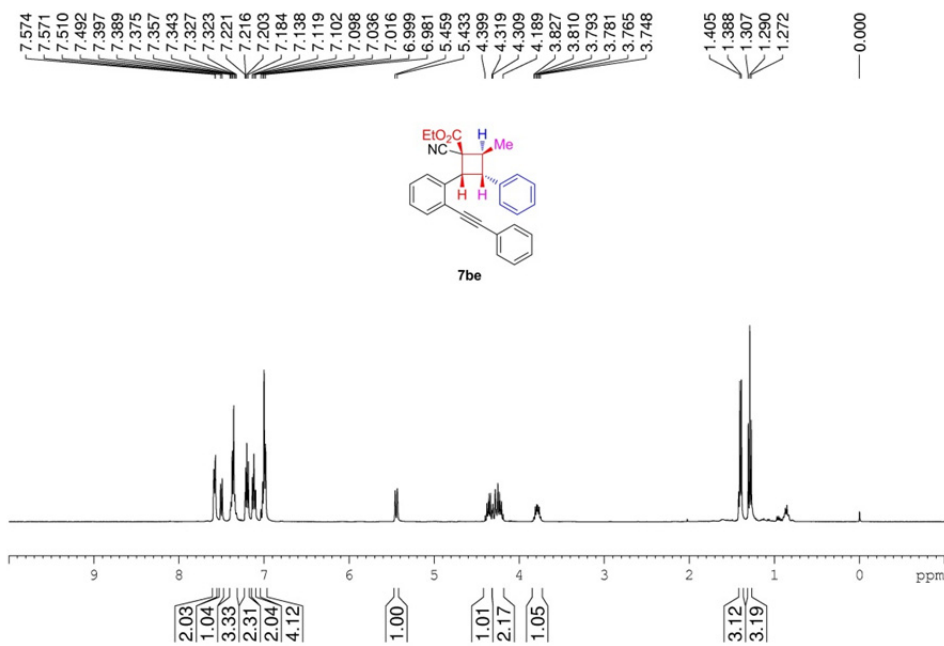

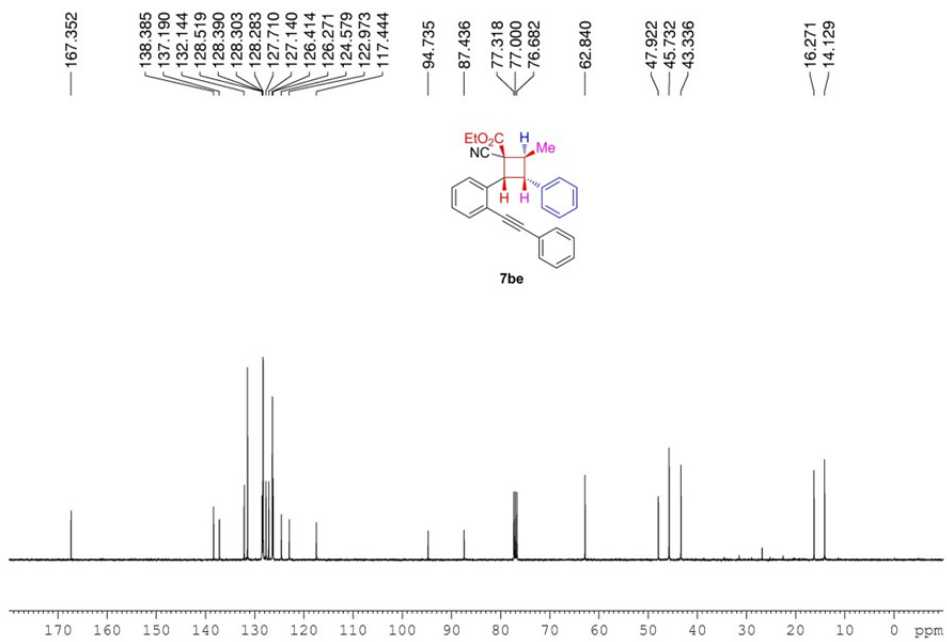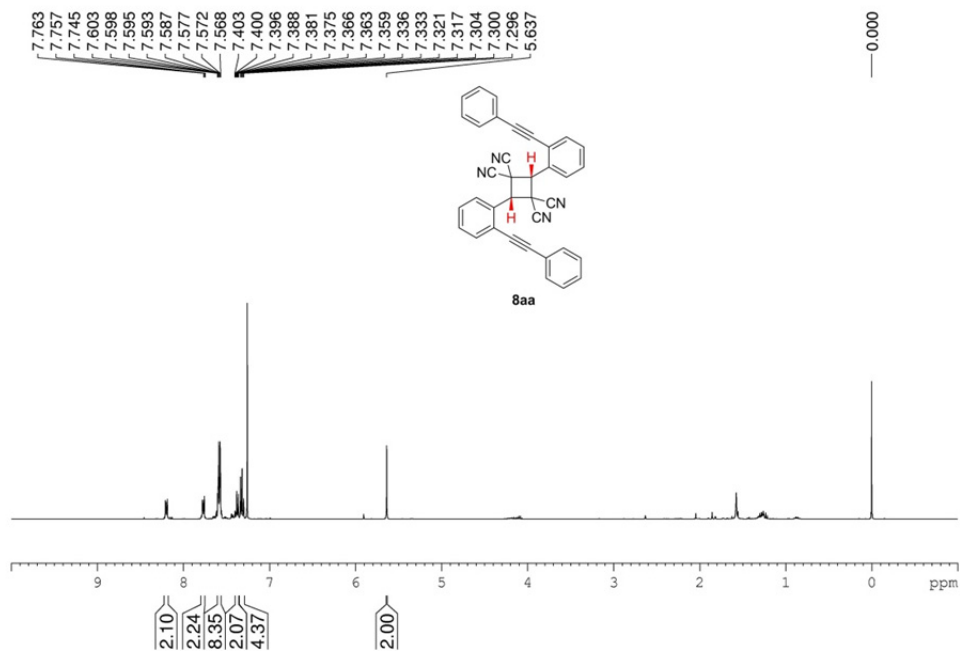

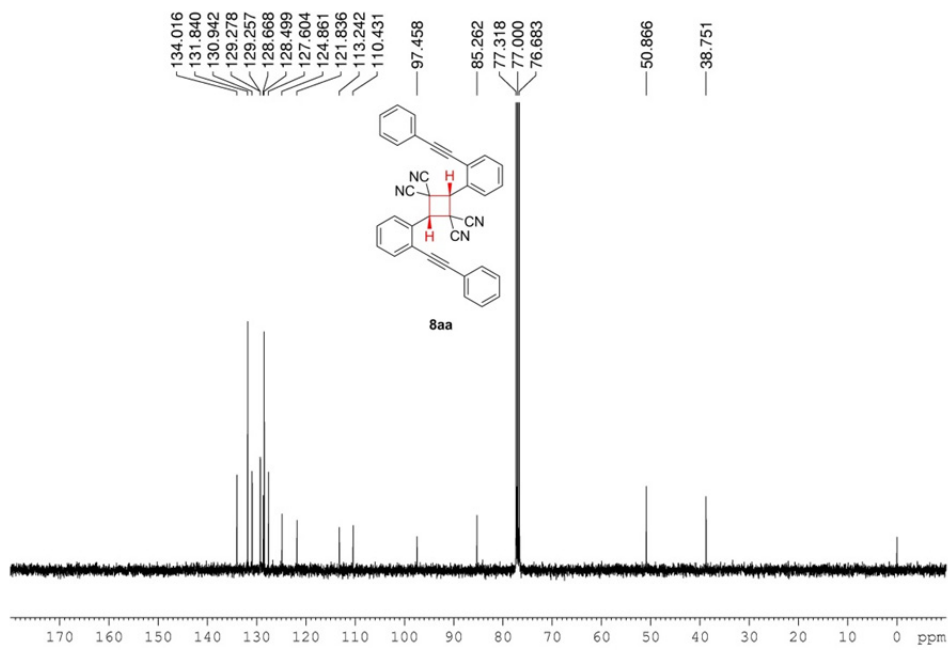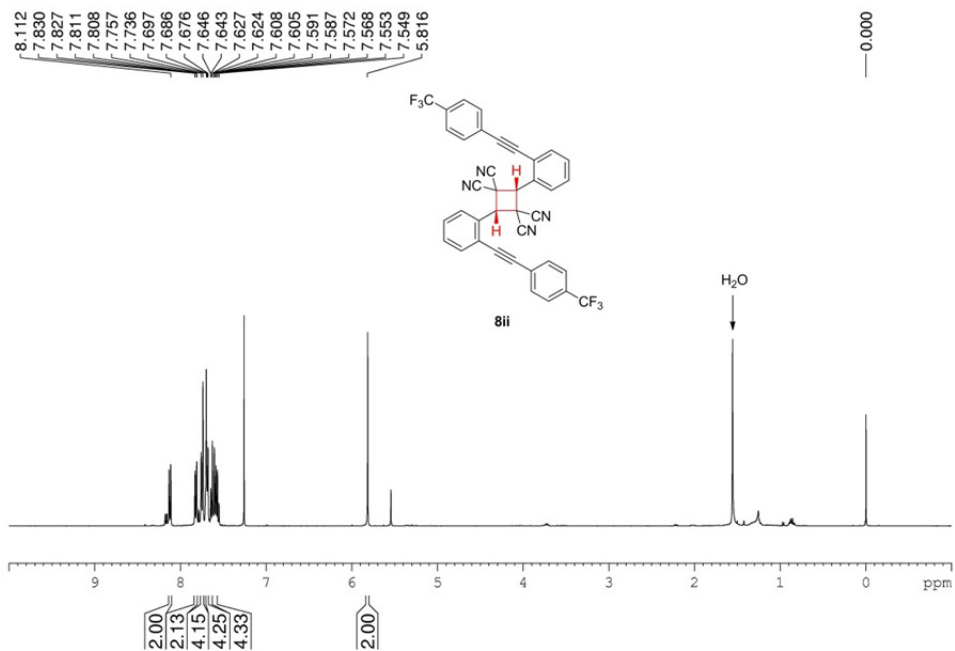

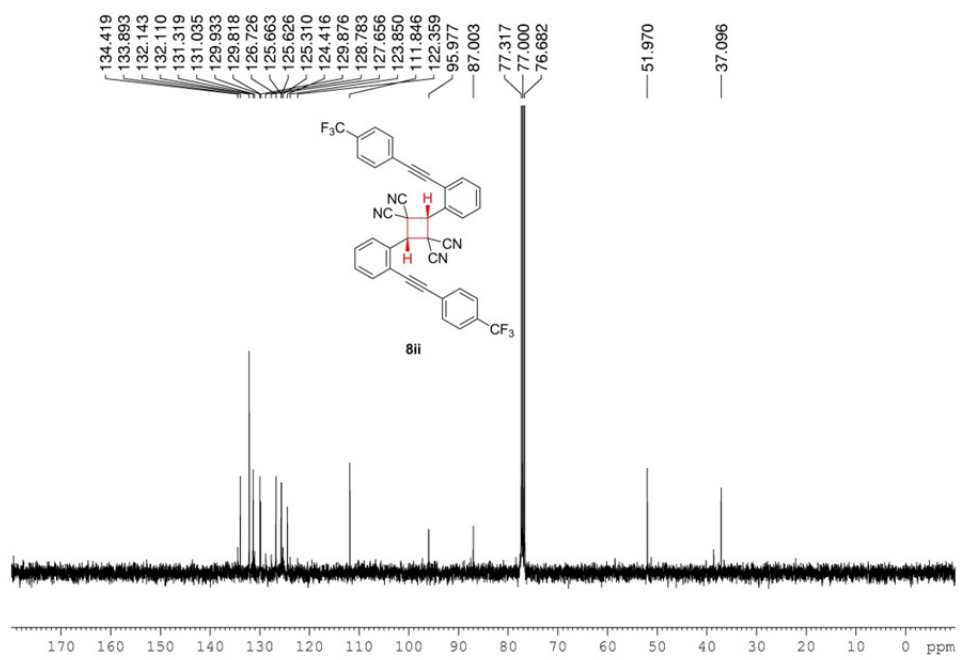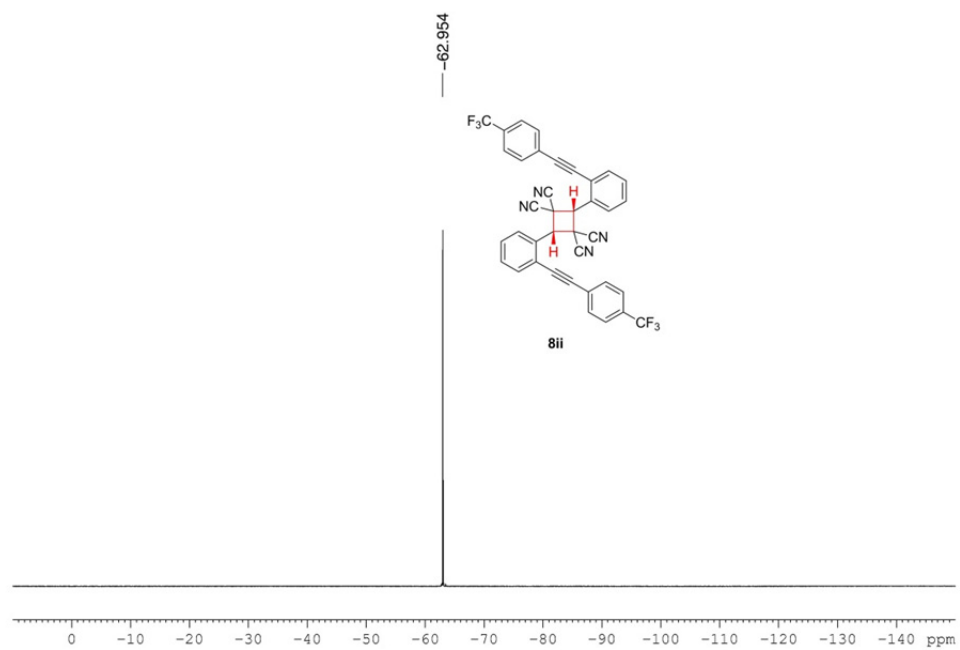

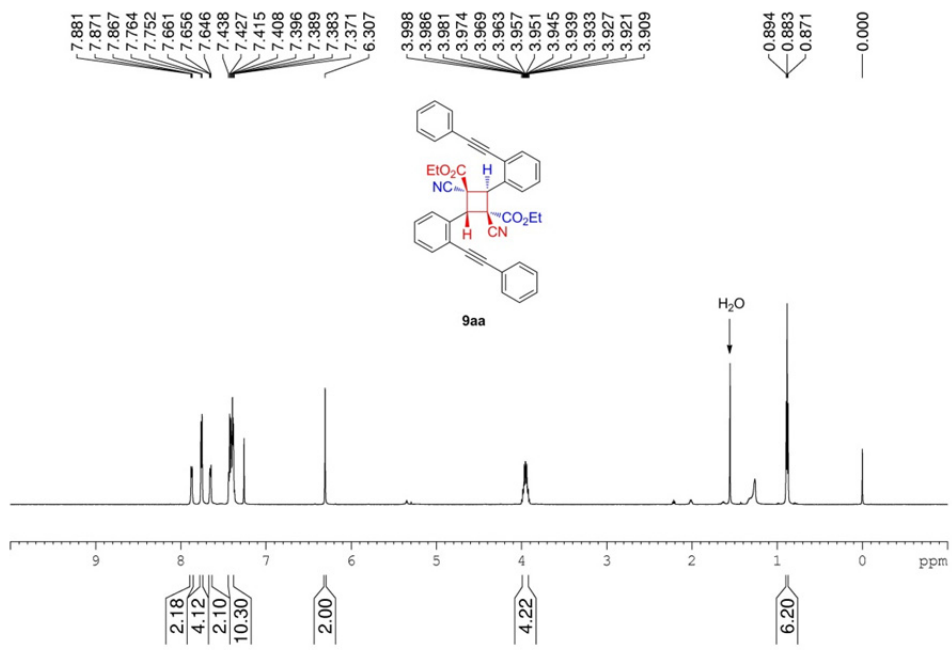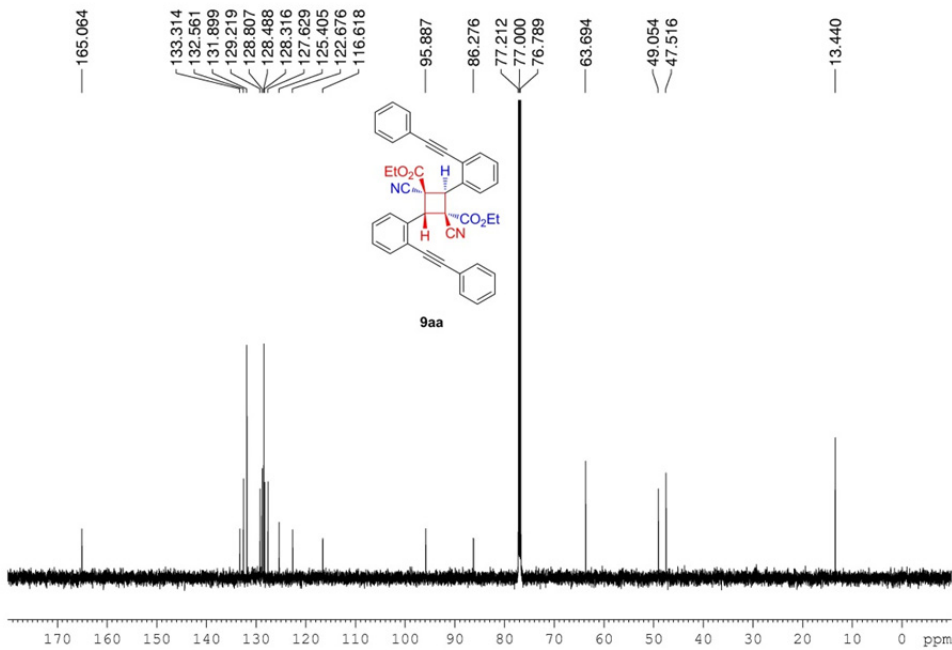

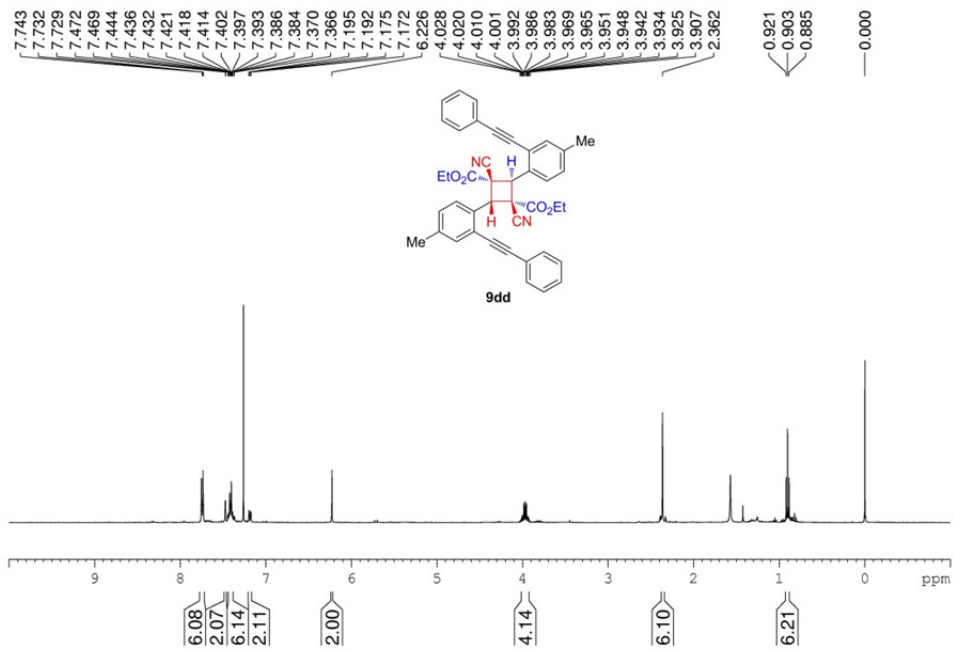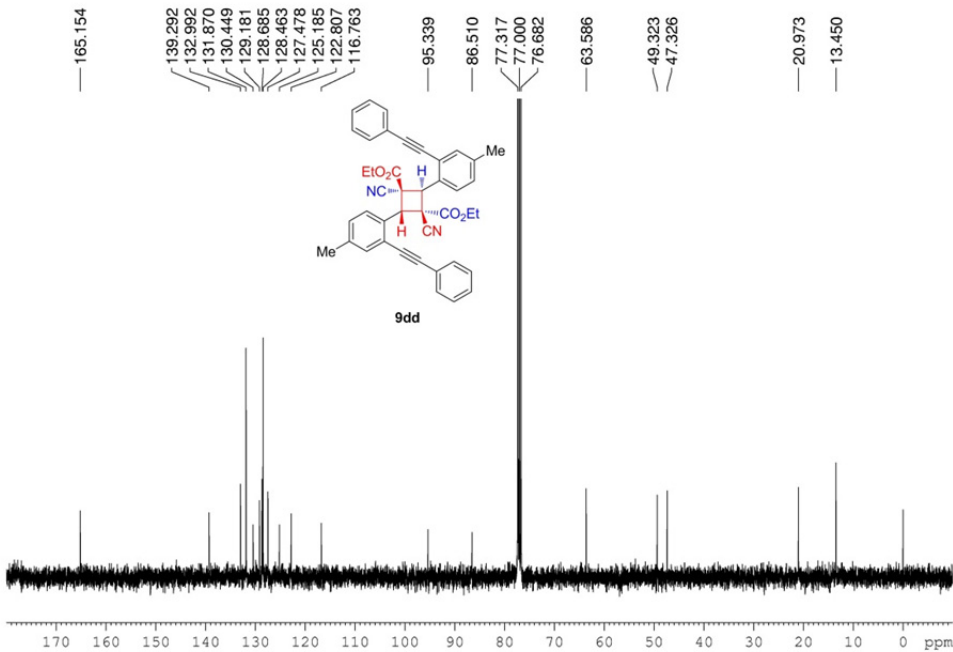



## 10. HRMS spectra for the products

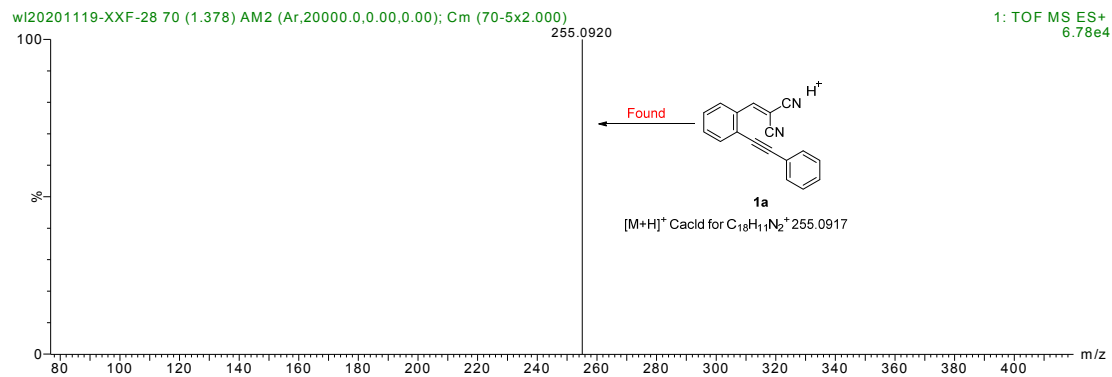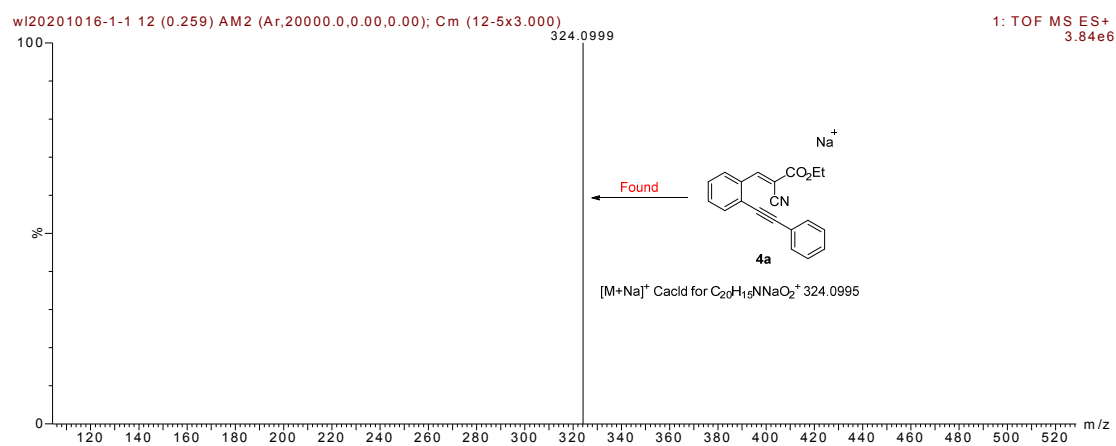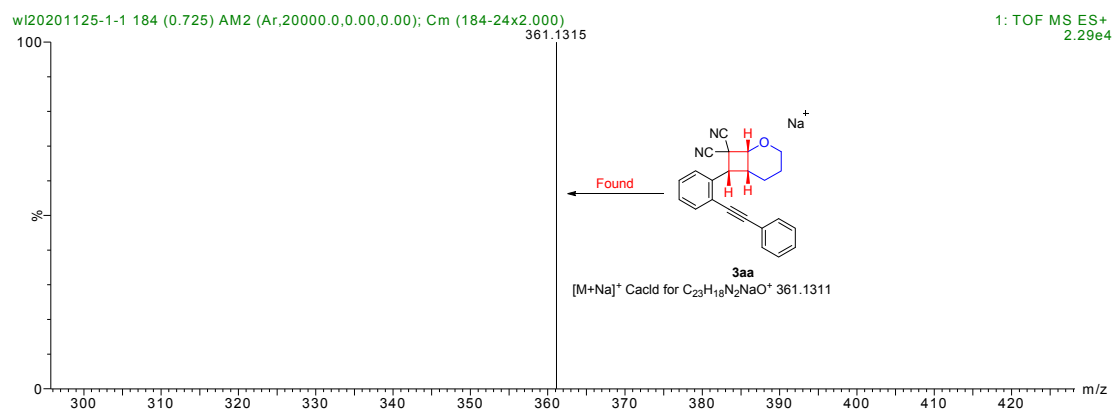

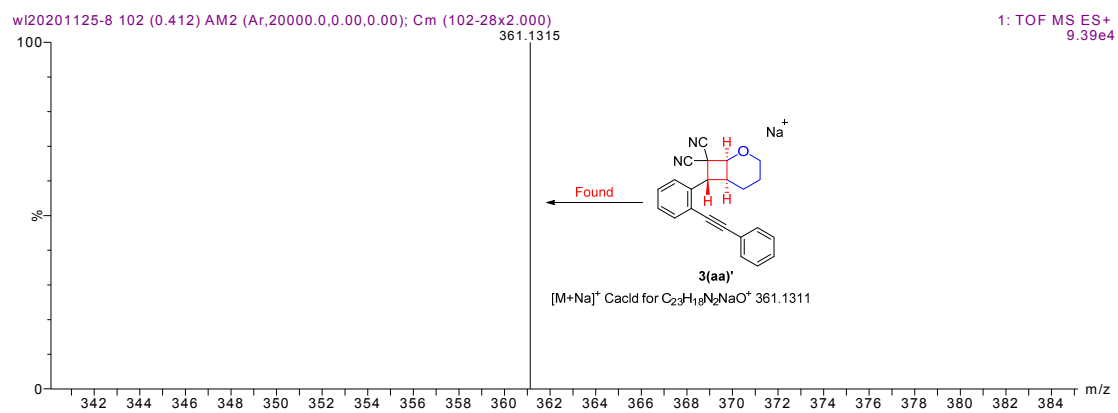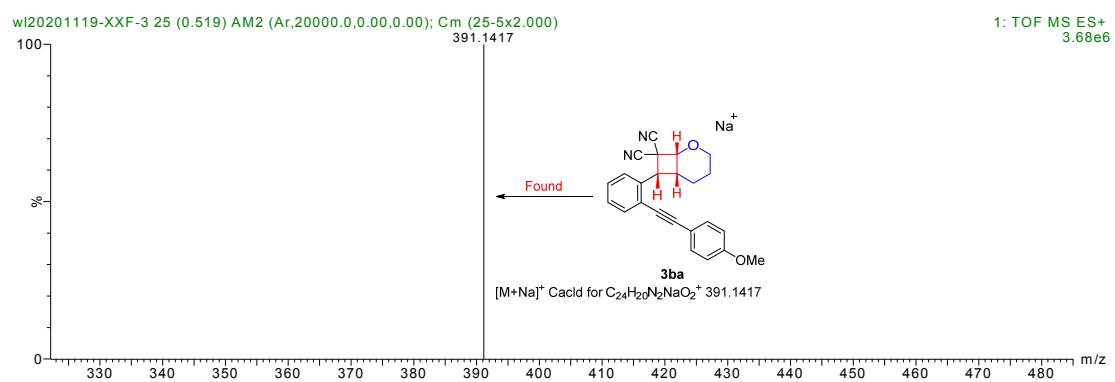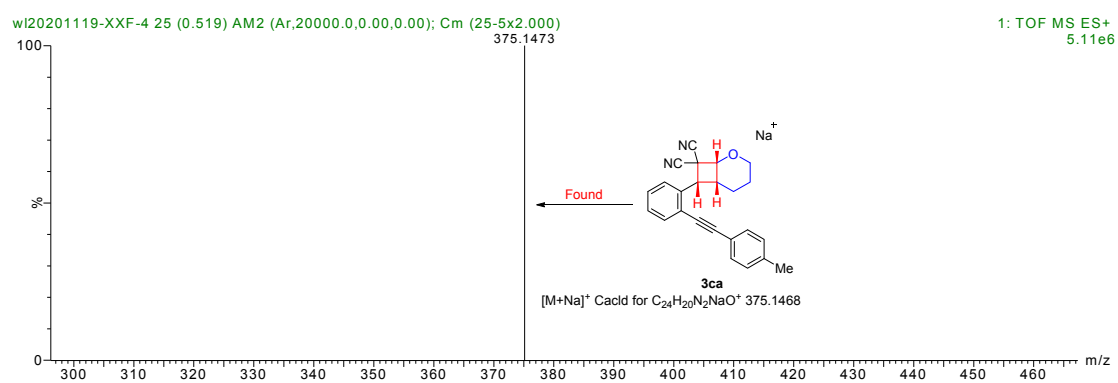

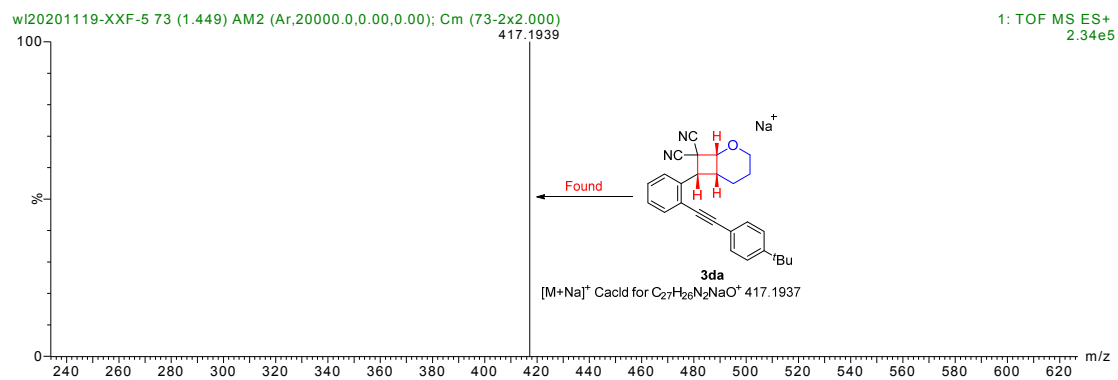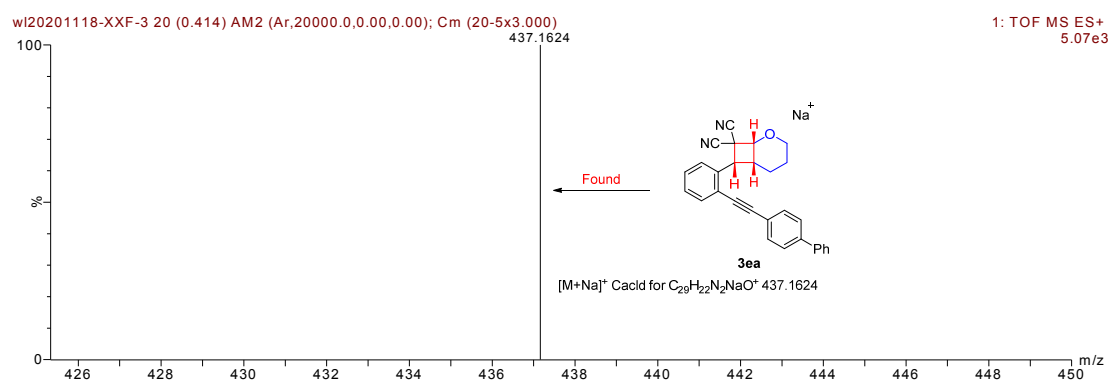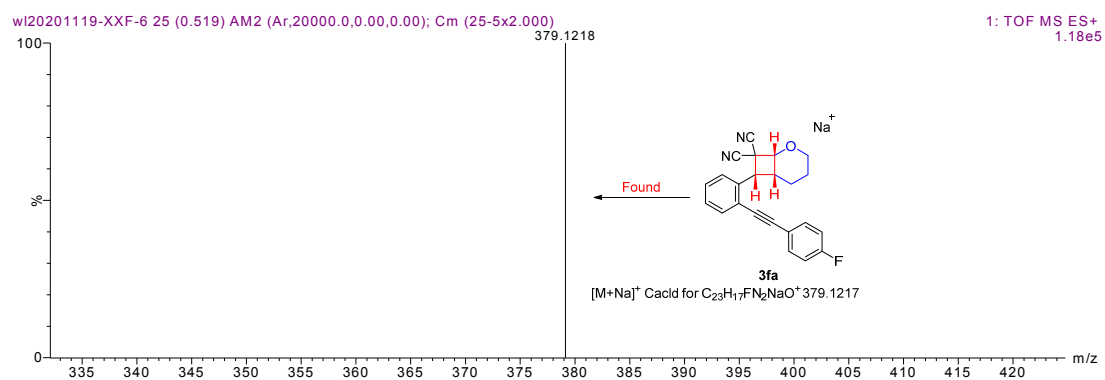

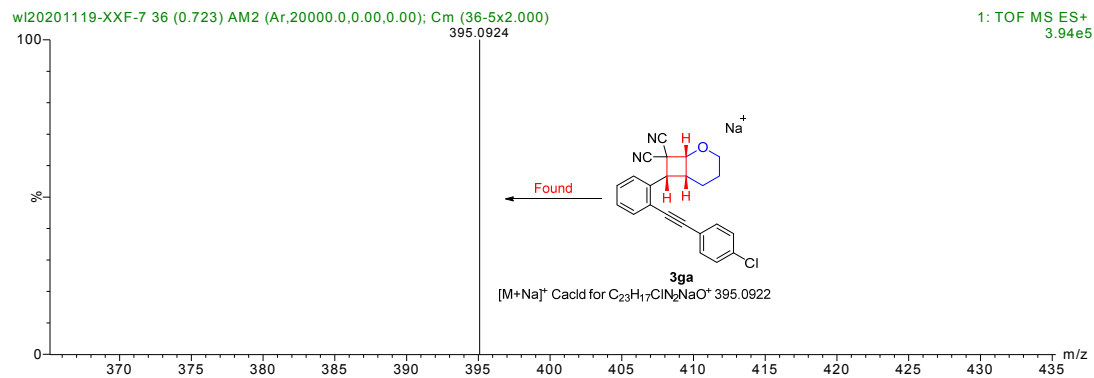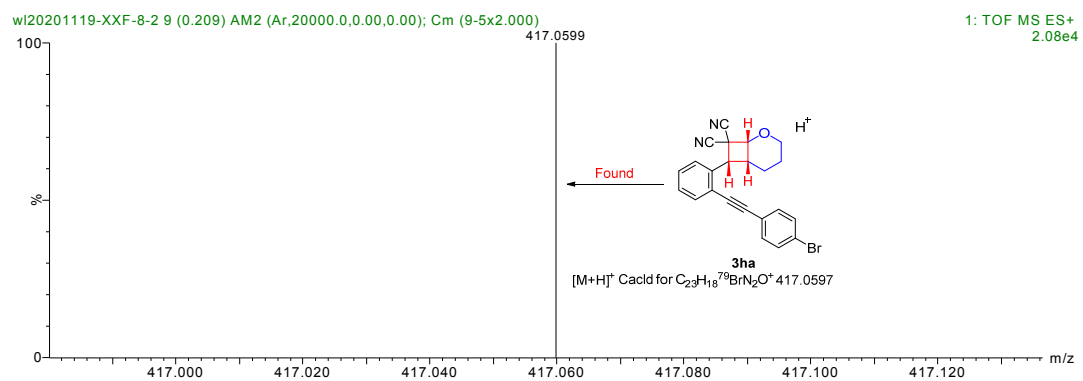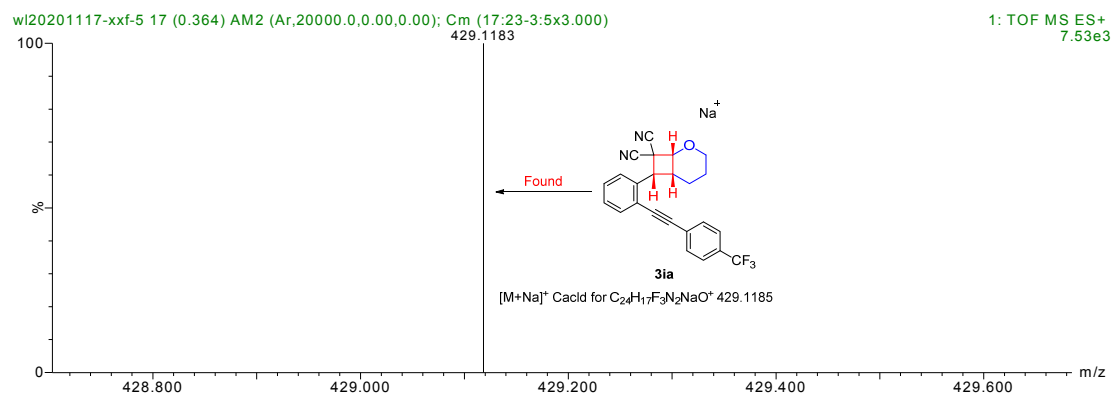

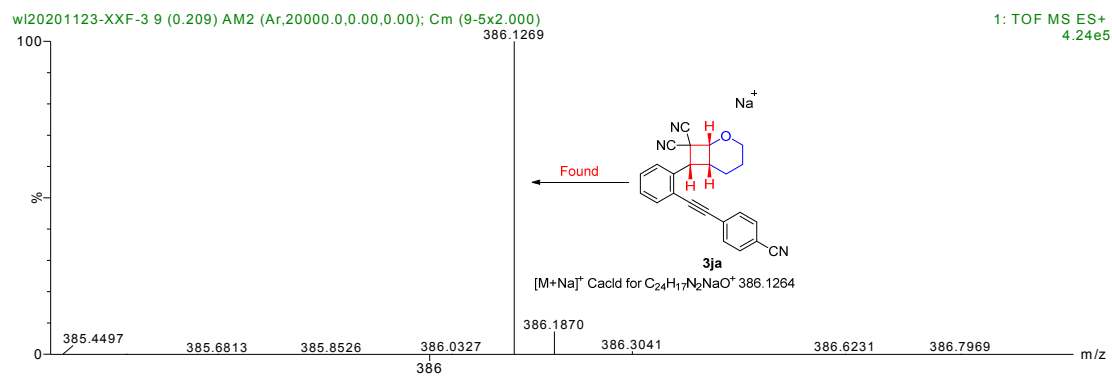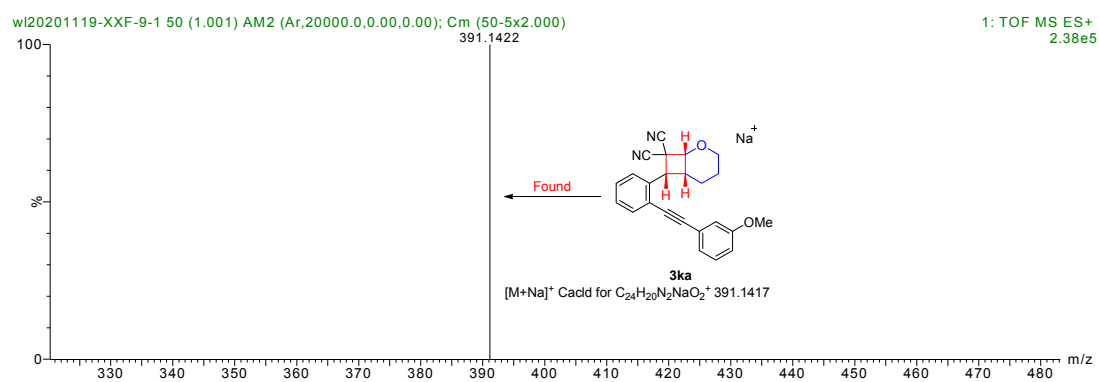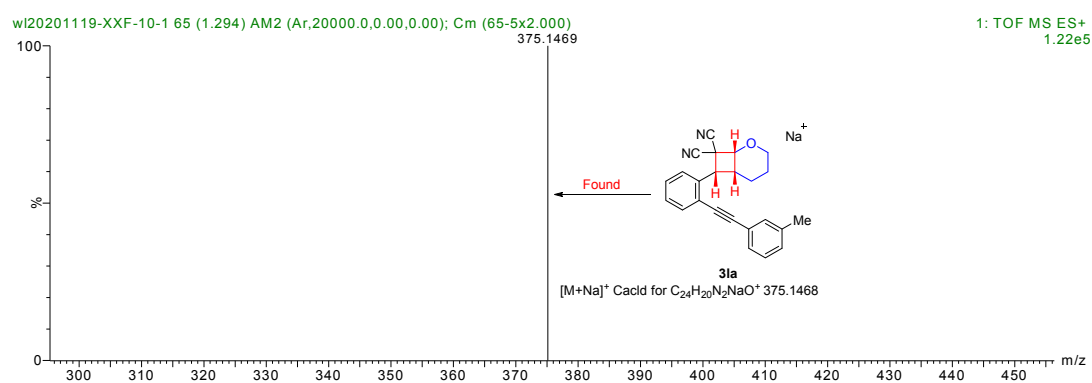

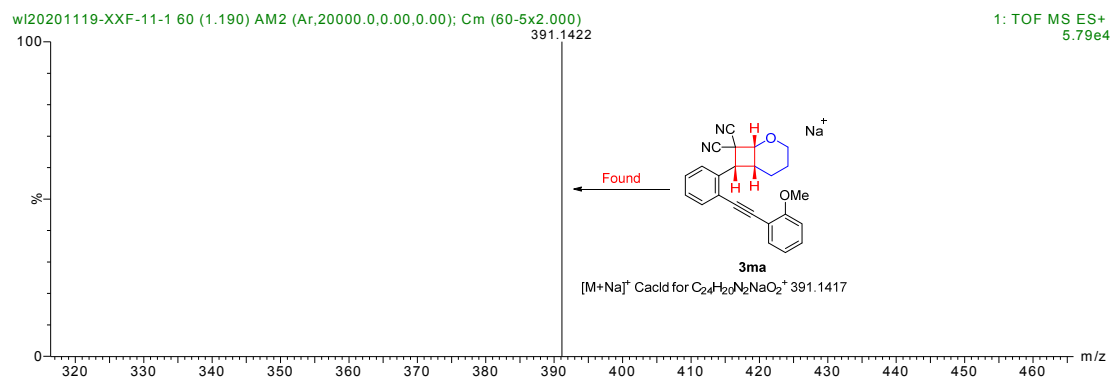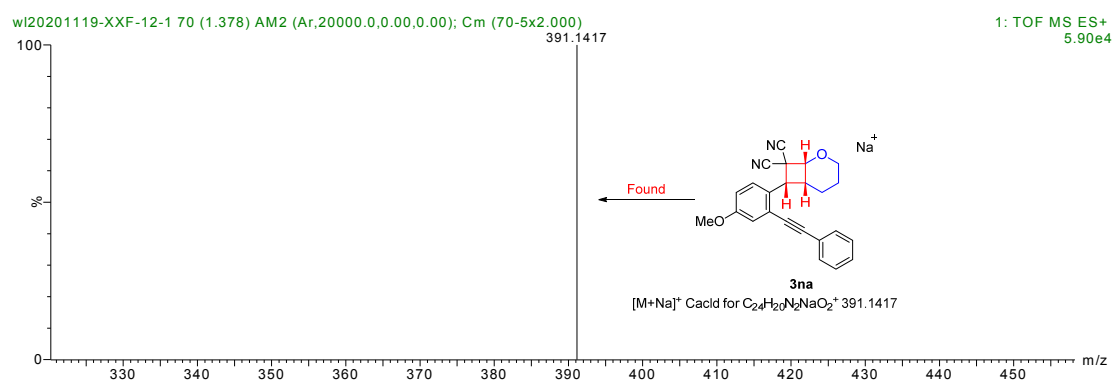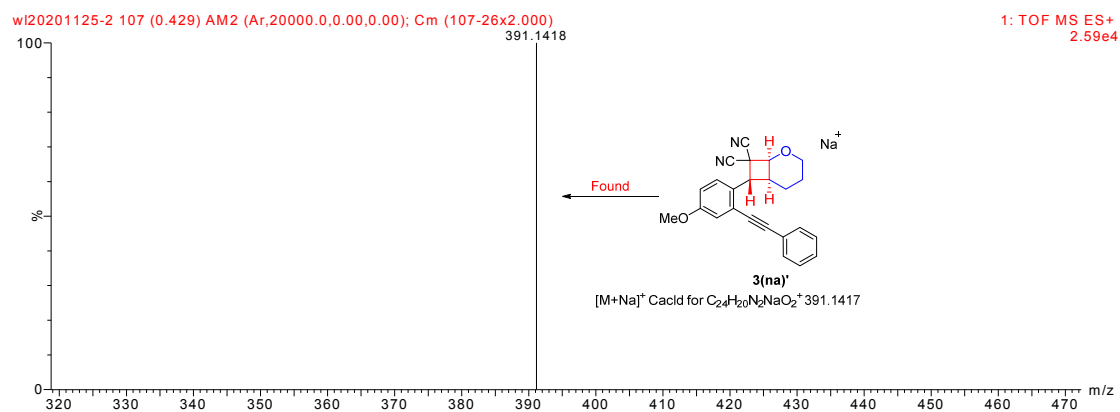

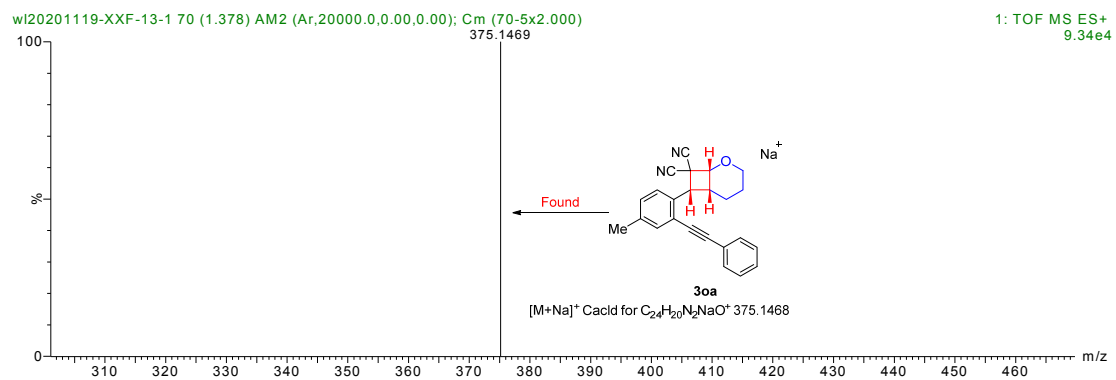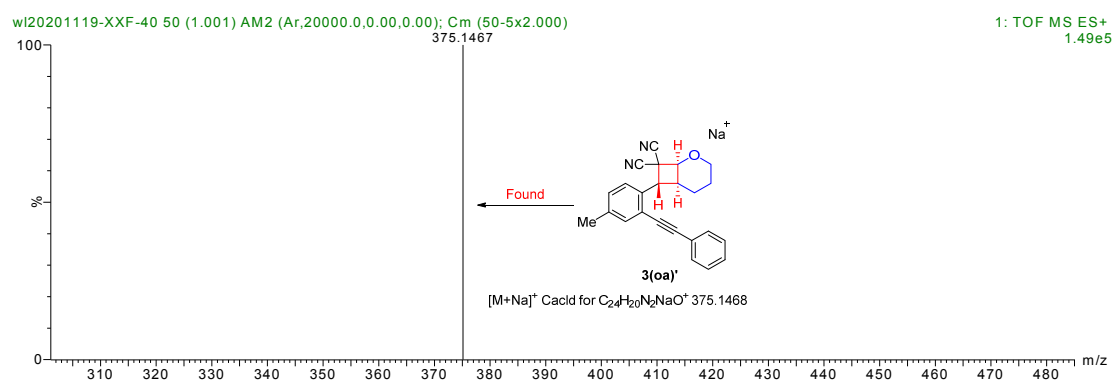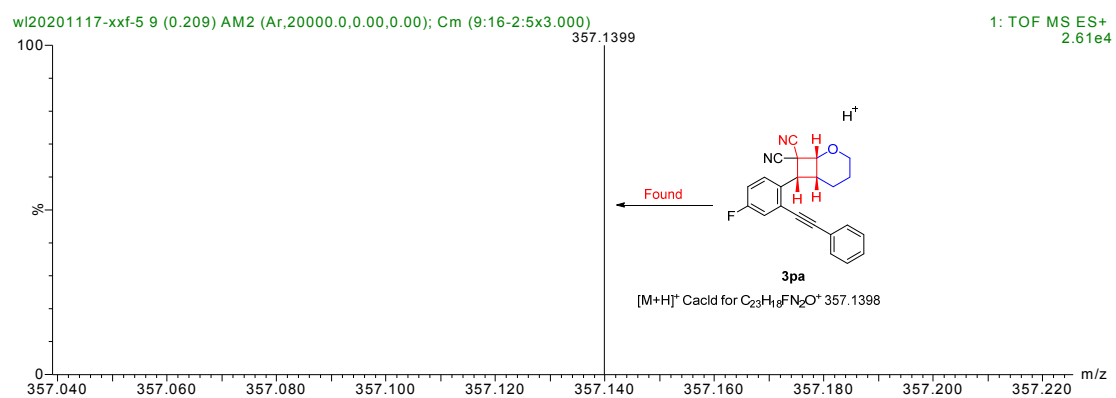

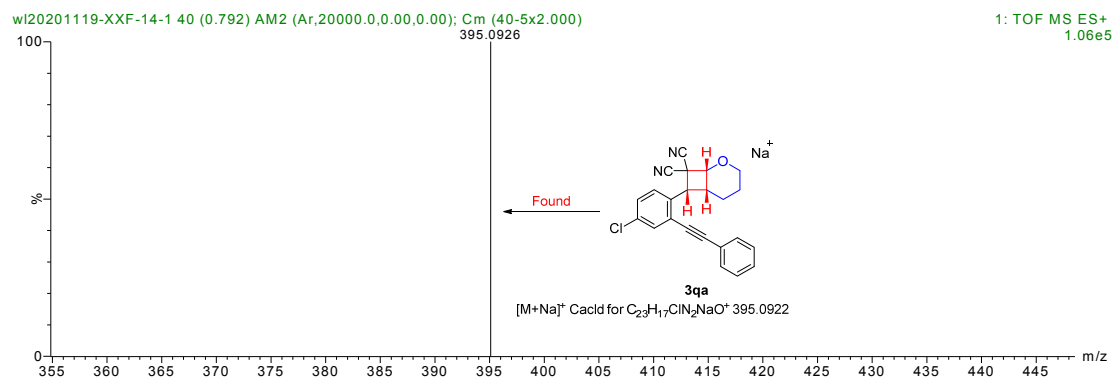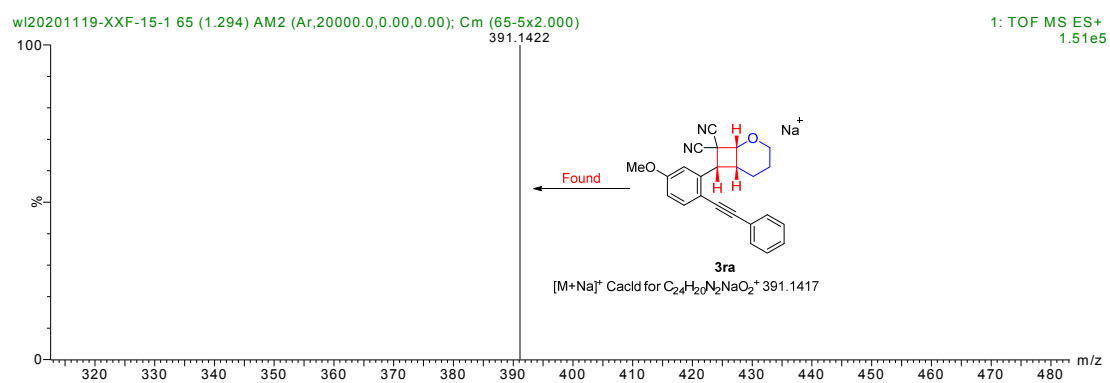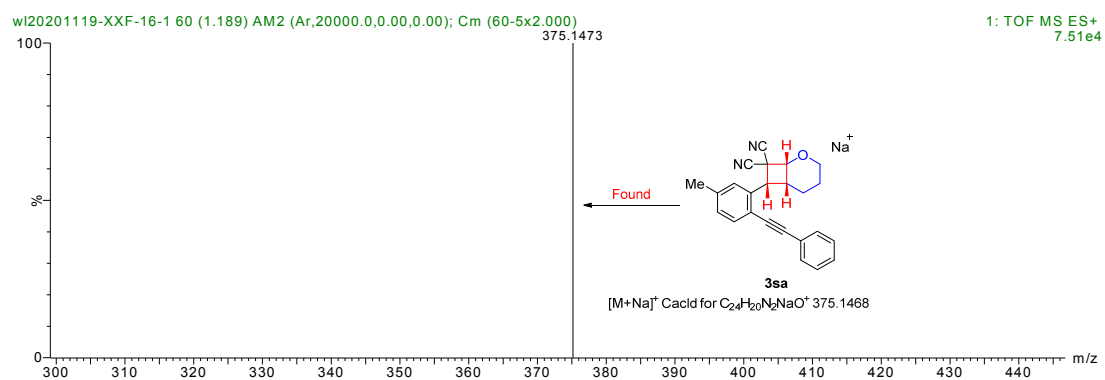



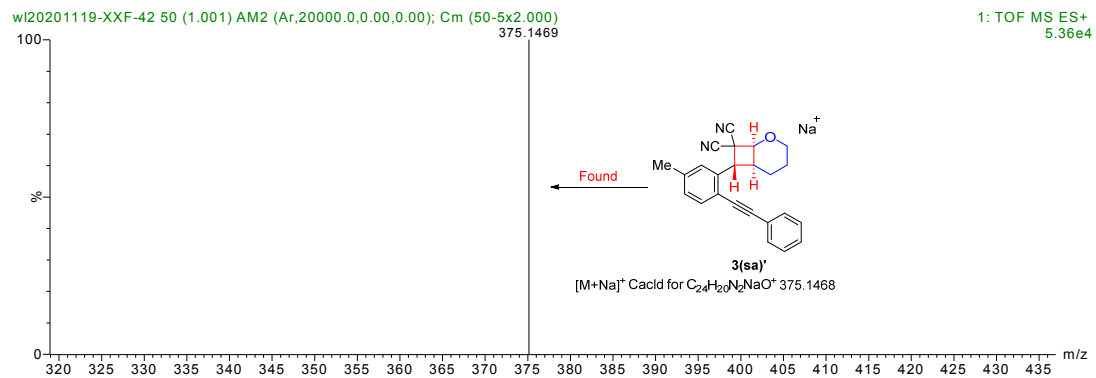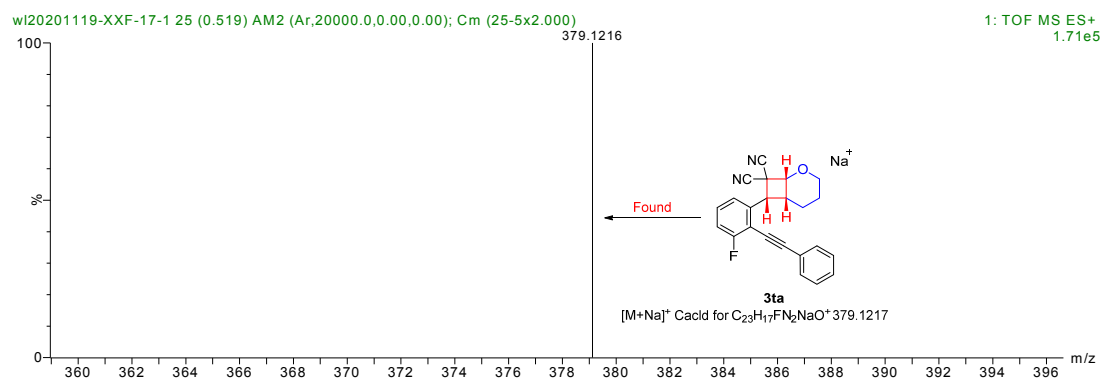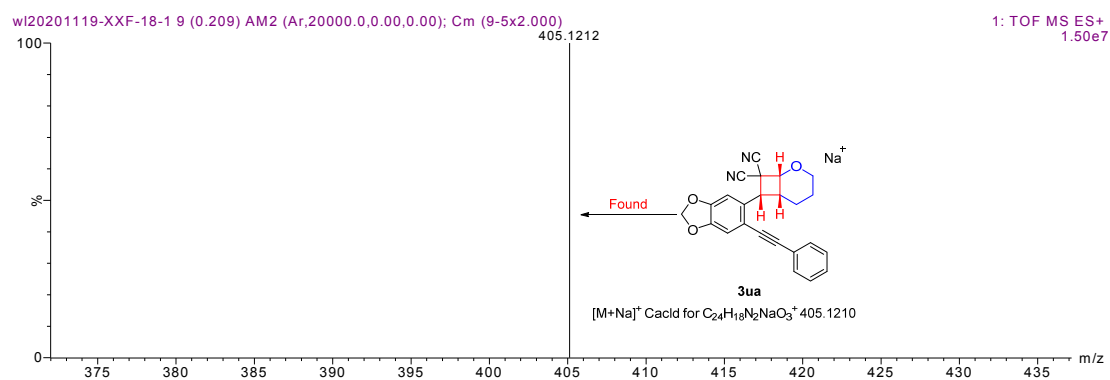

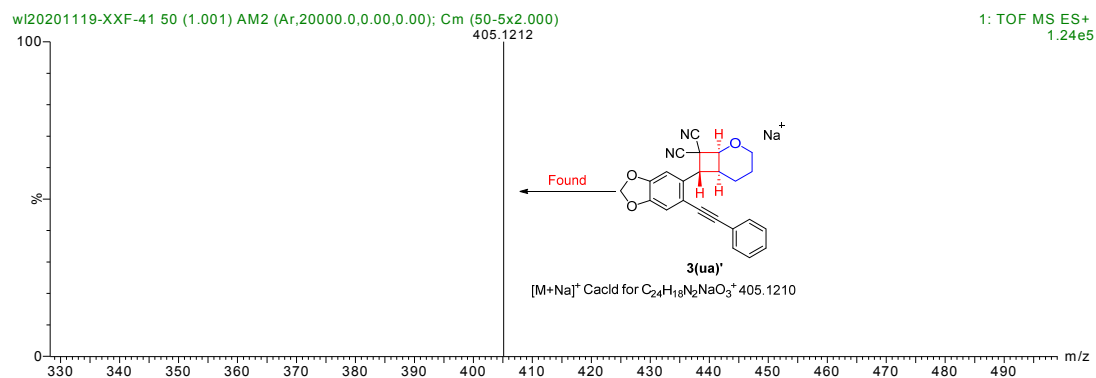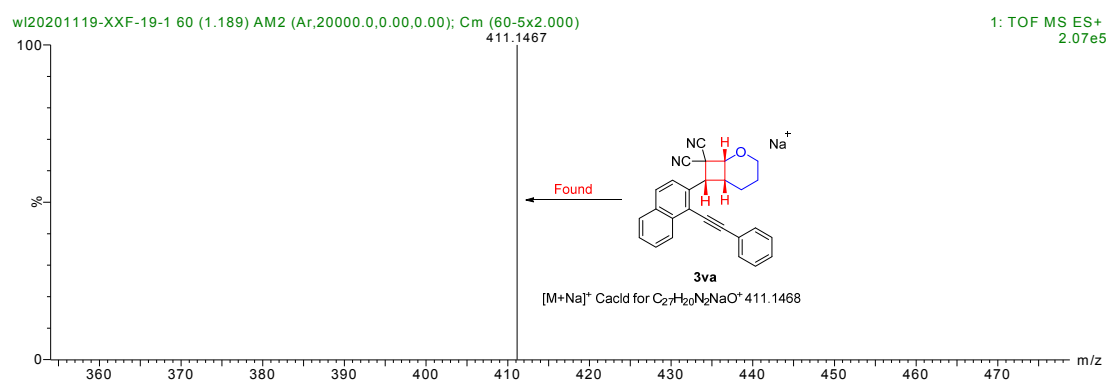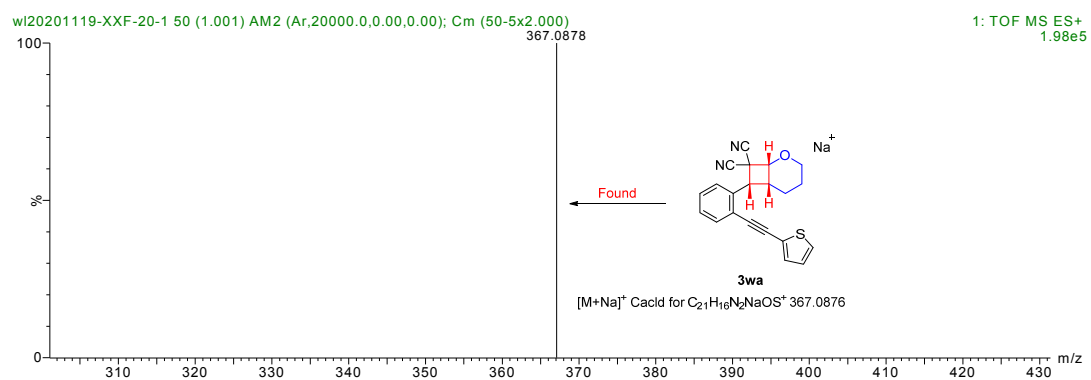

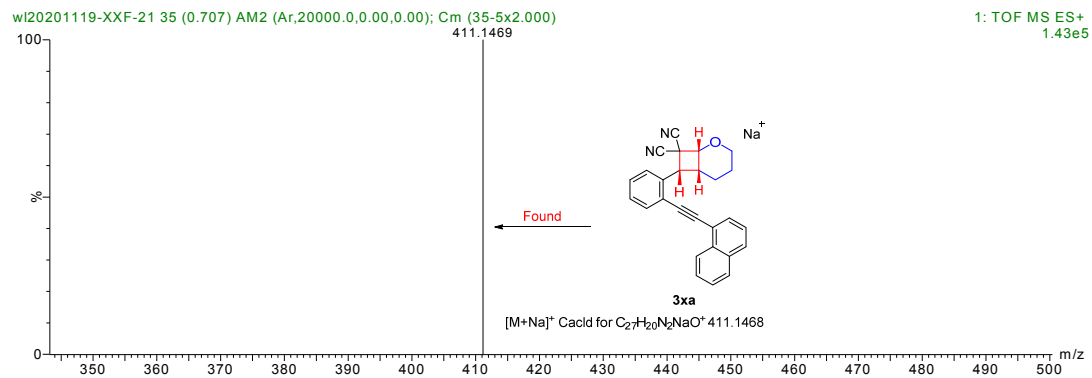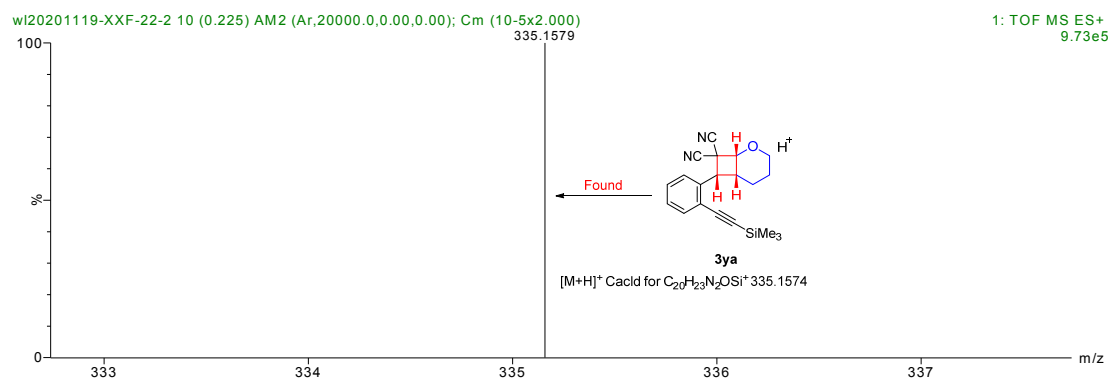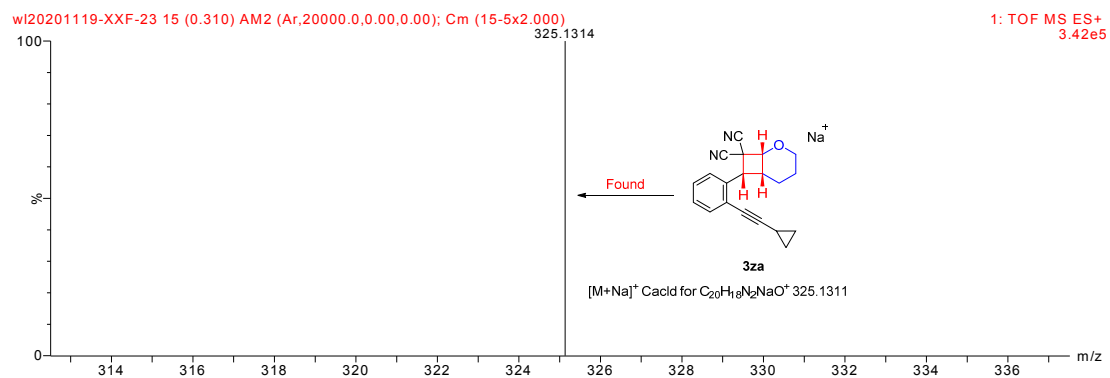

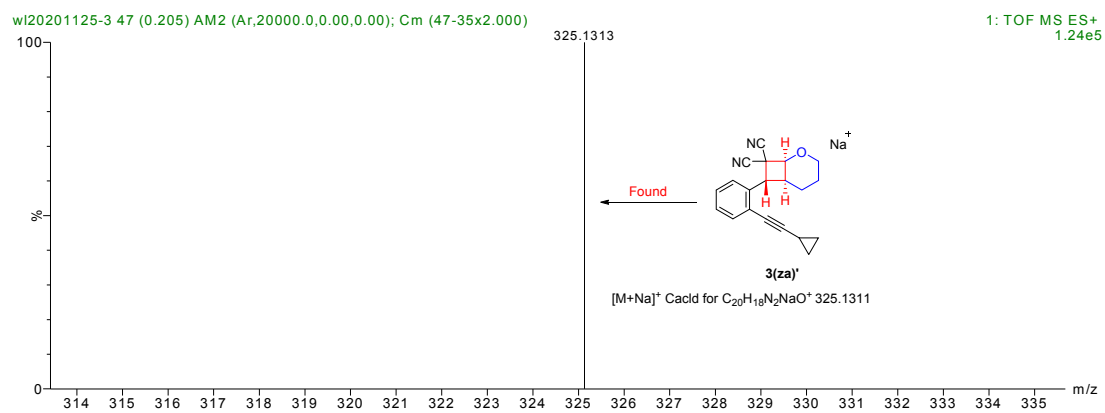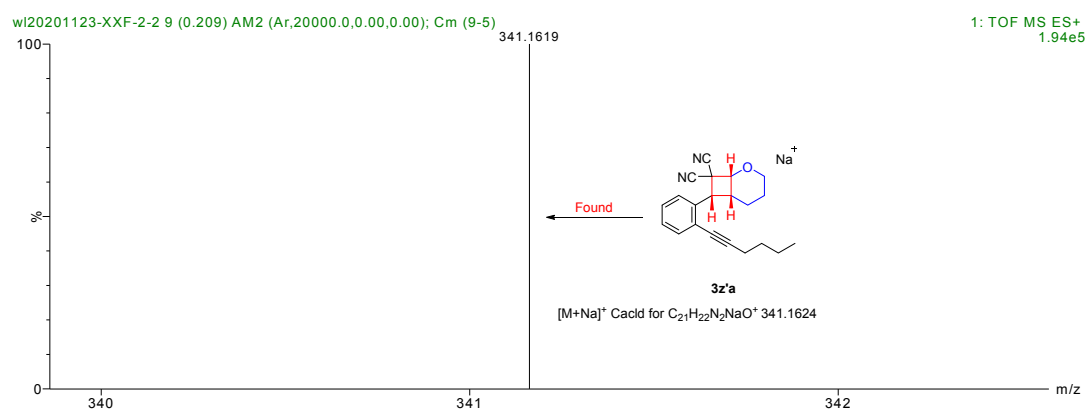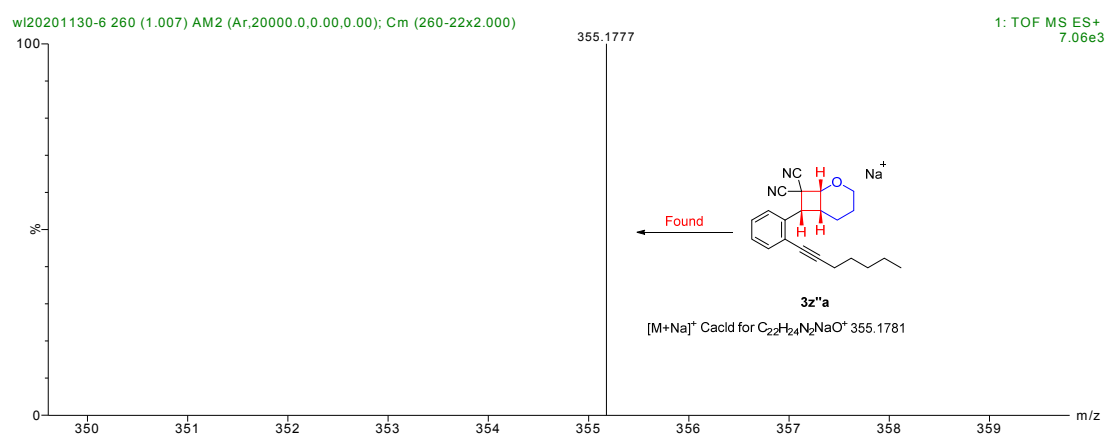

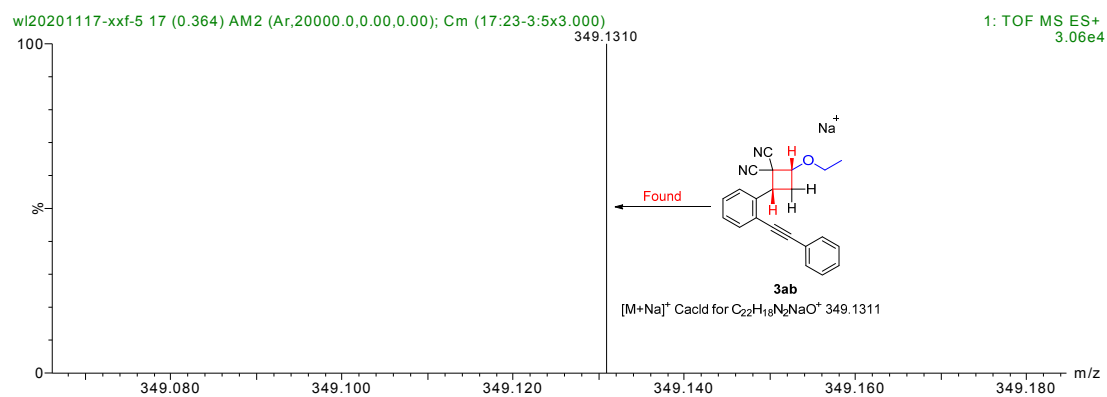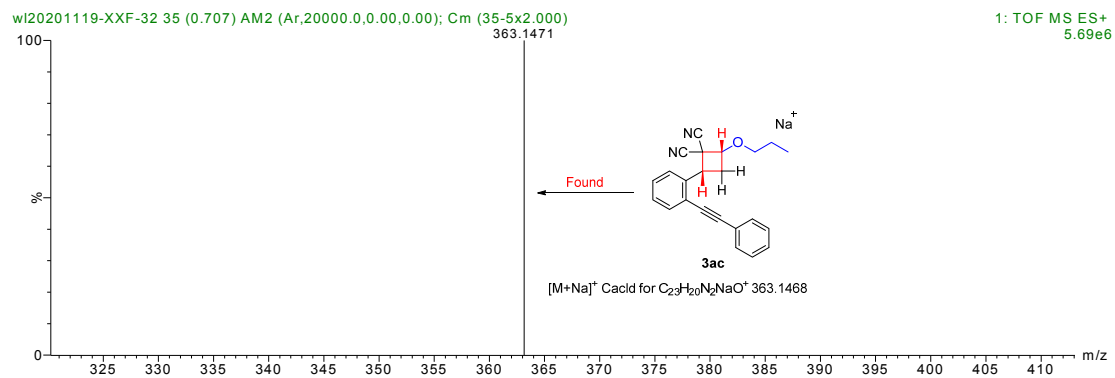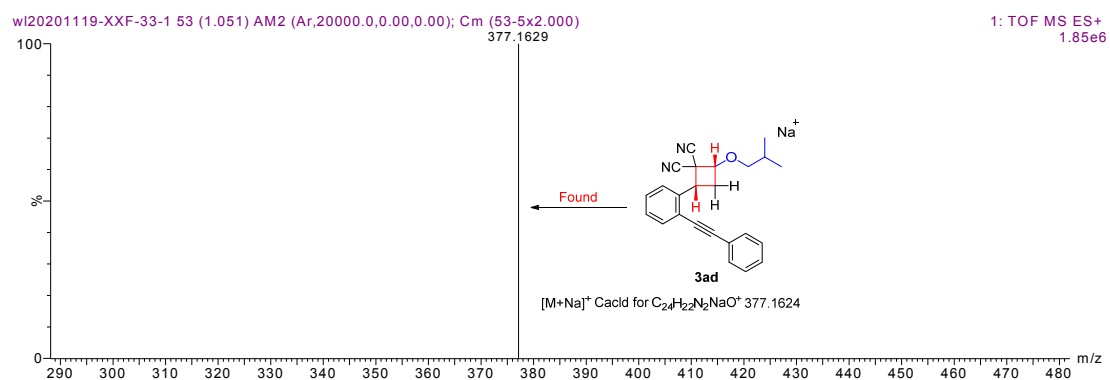

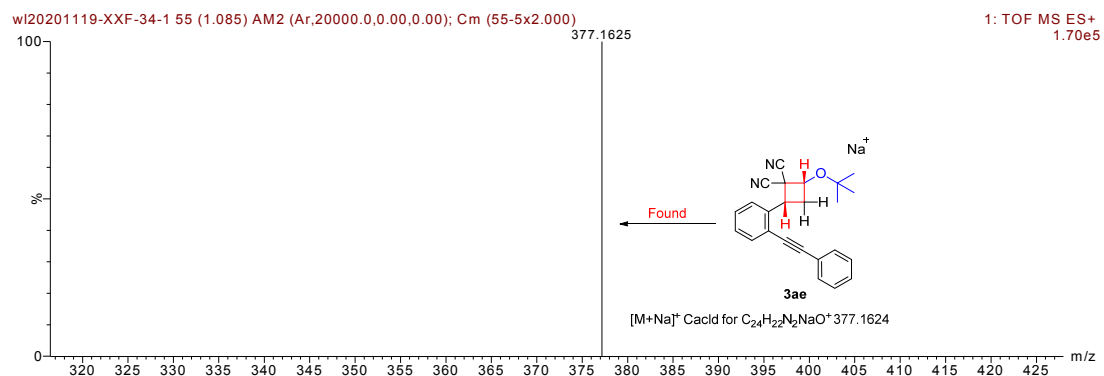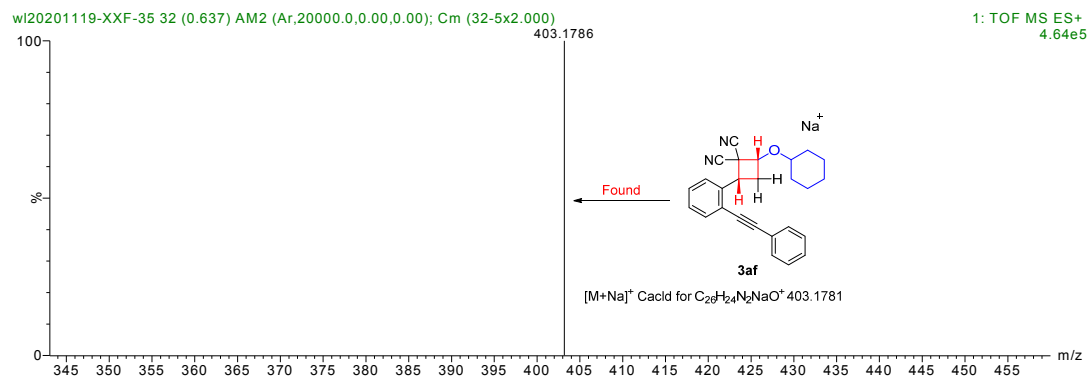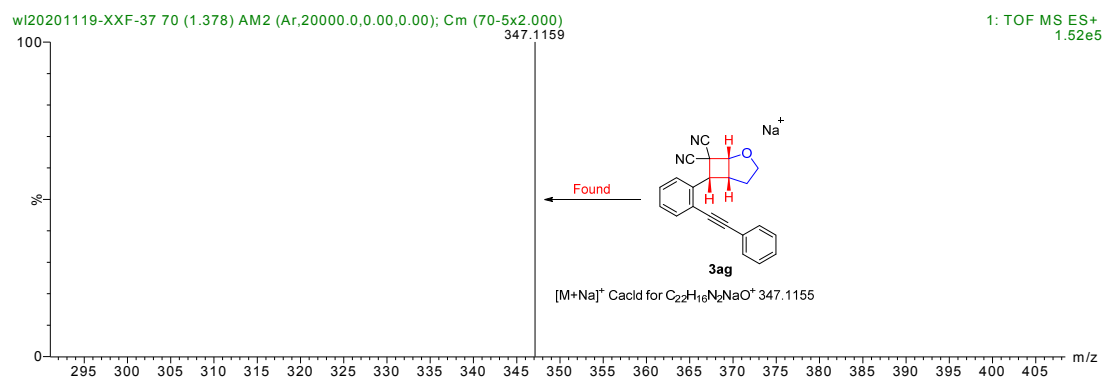

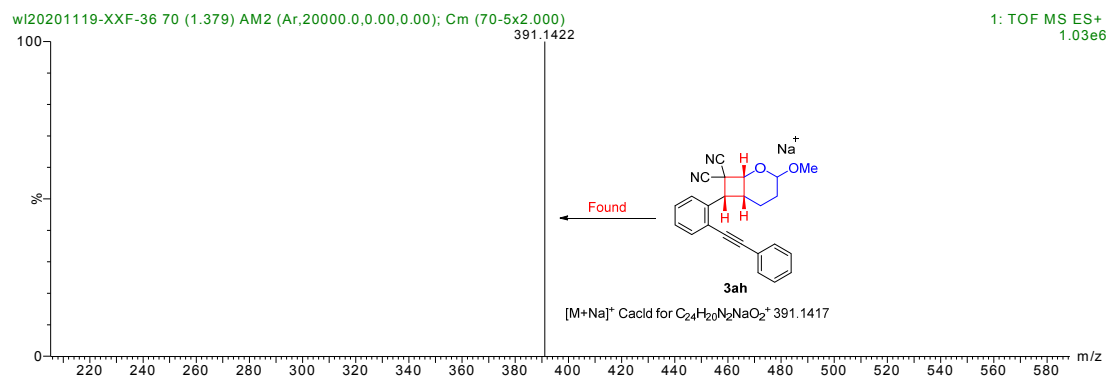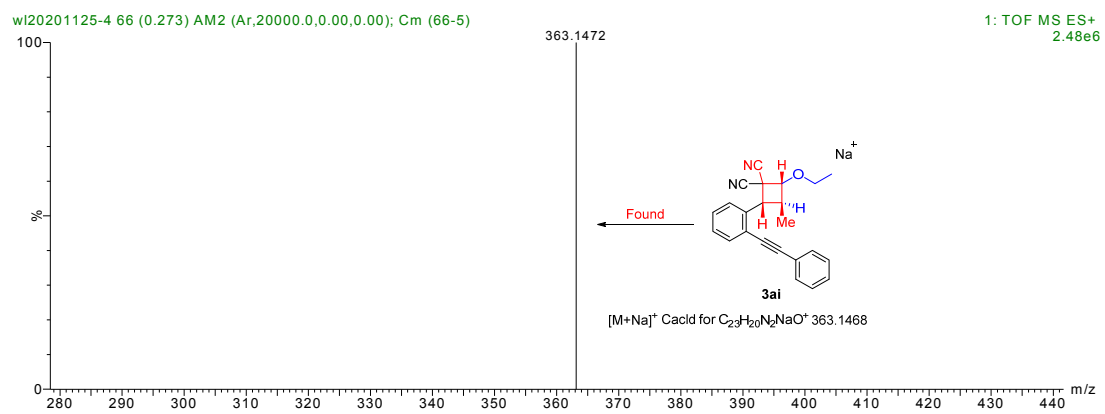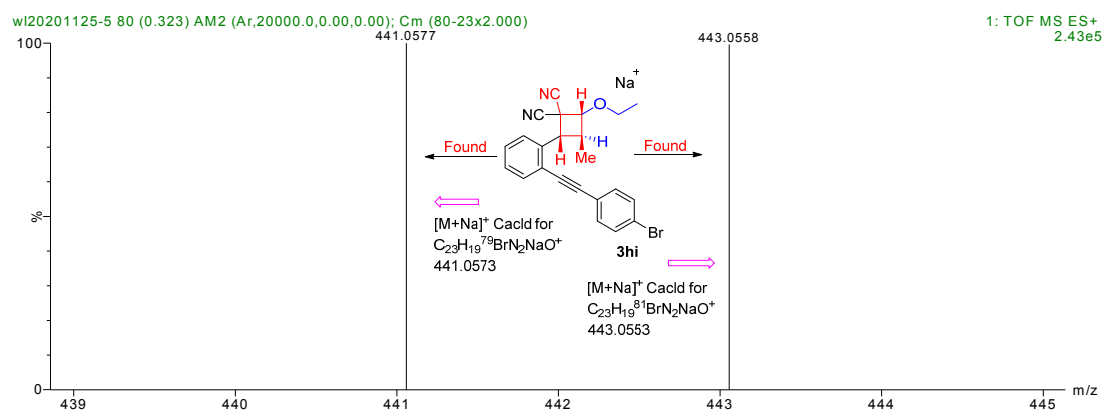

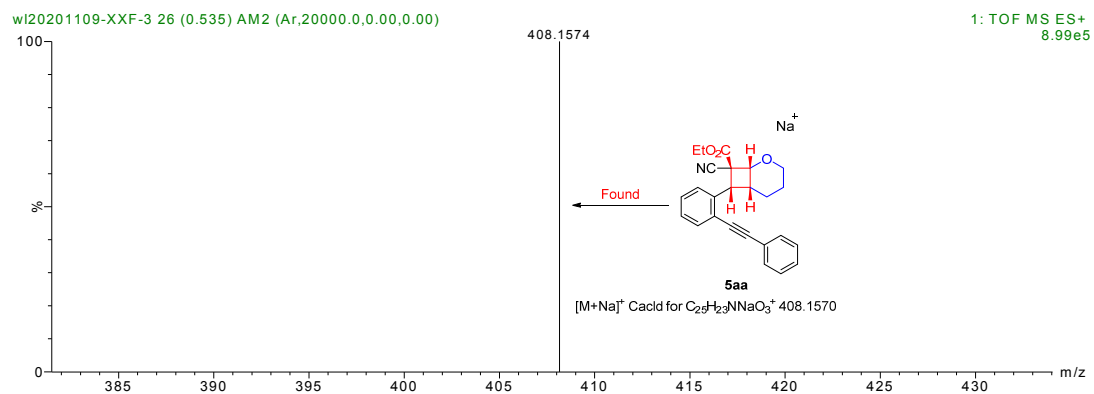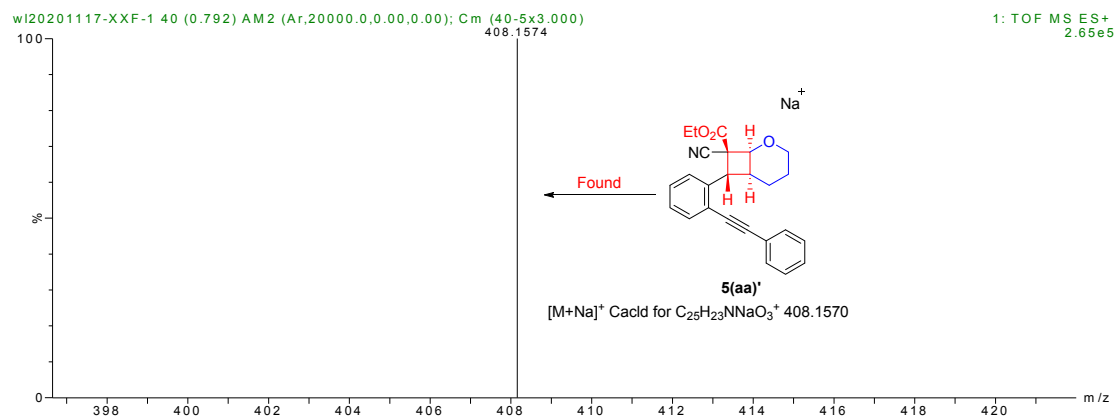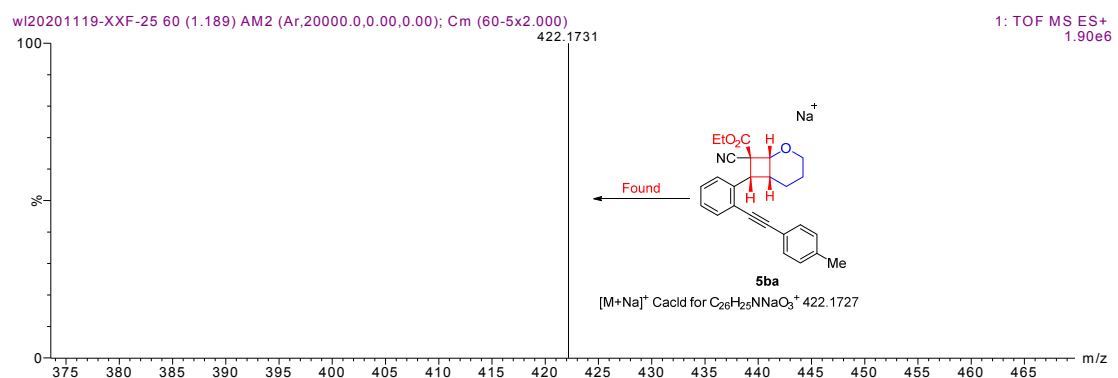



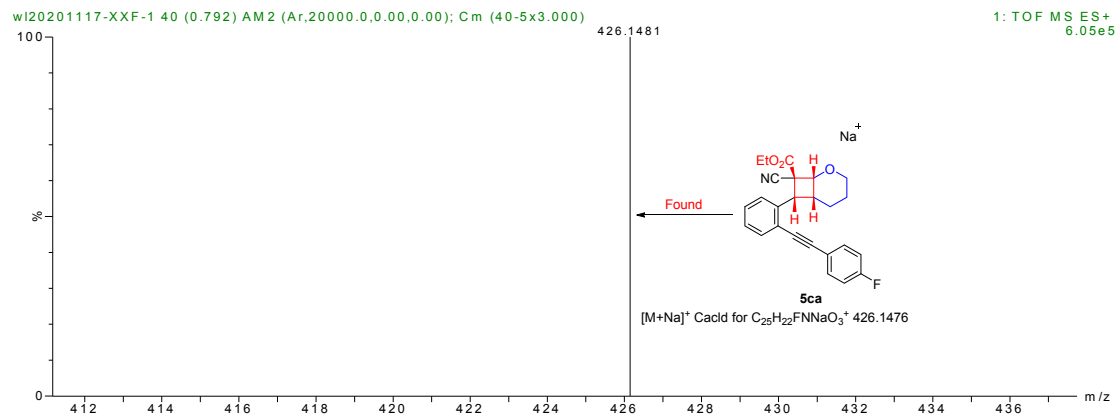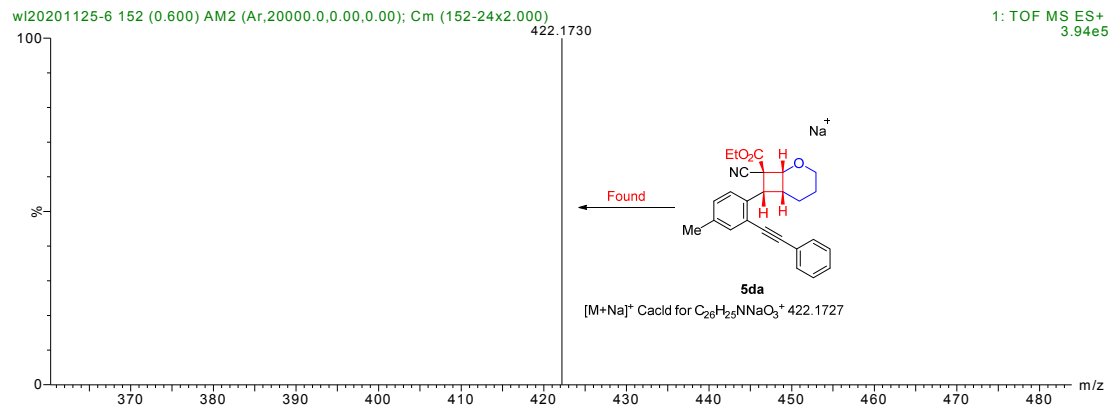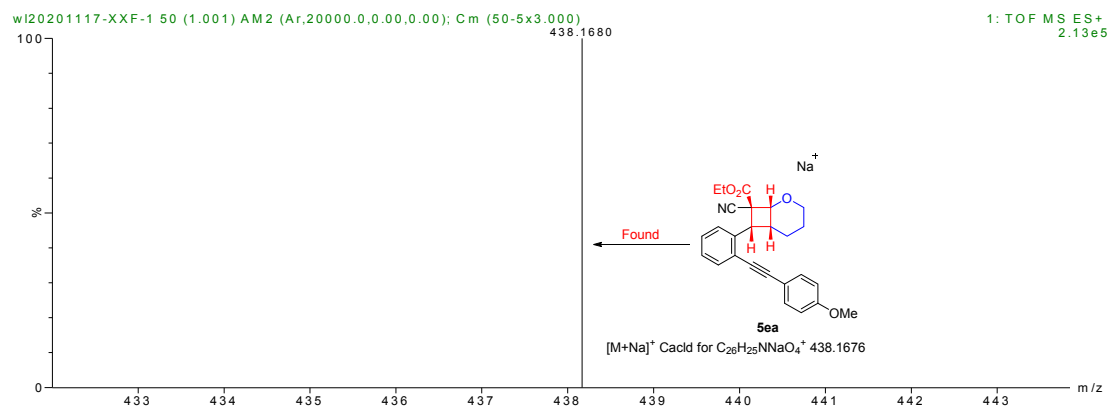

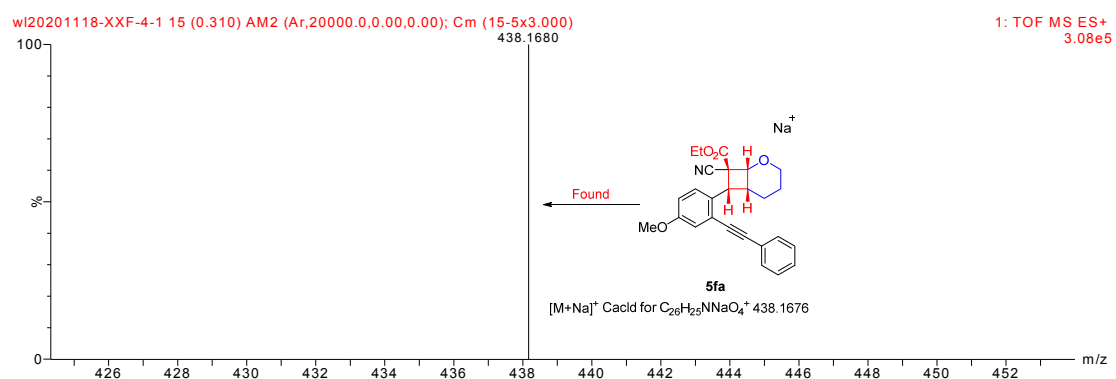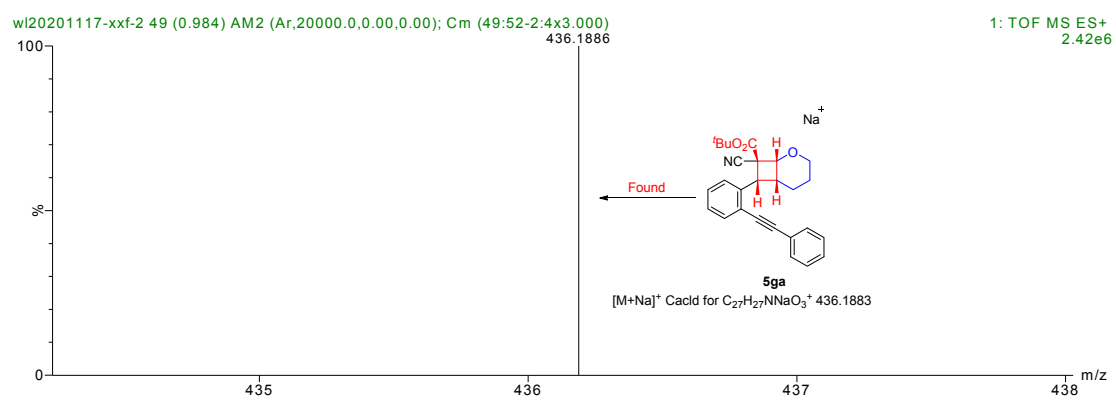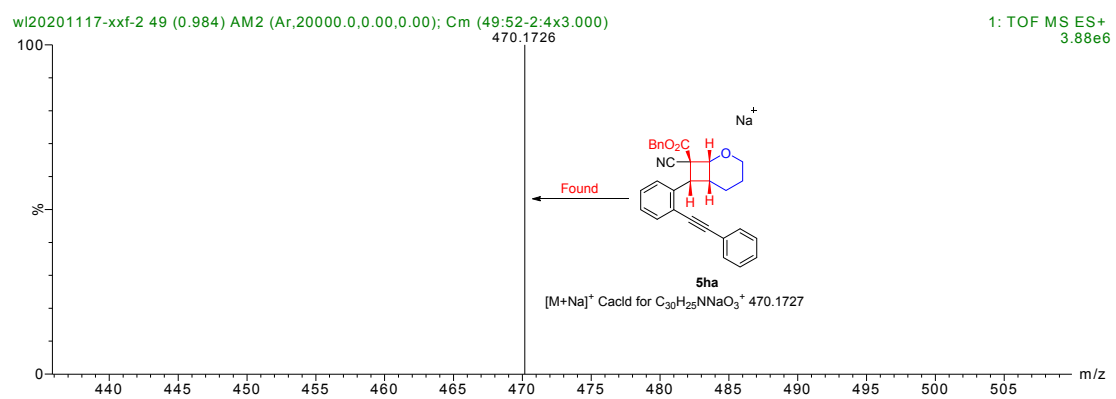

wI20201117-xxf-1-1 45 (0.896) AM2 (Ar,20000.0,0.00,0.00); Cm (45:47-3:5x3.000)

1: TOF MS ES+  
2.31e6

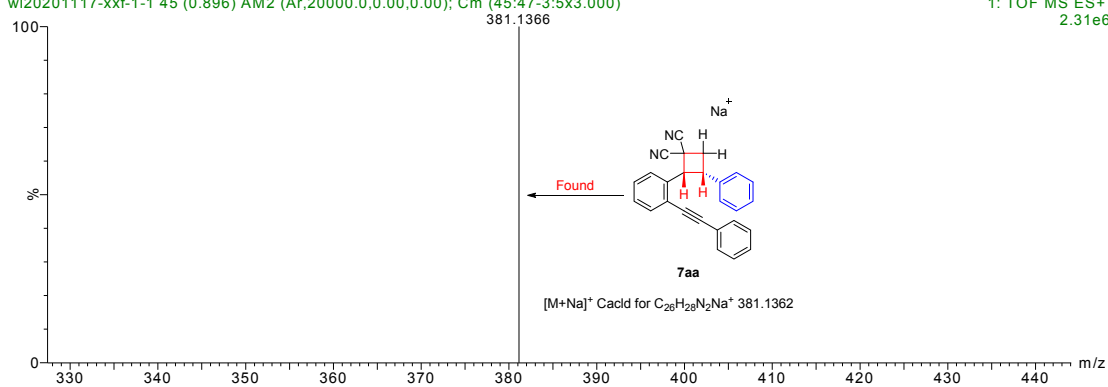

wI20201119-XXF-26 75 (1.483) AM2 (Ar,20000.0,0.00,0.00); Cm (75-5x2.000)

1: TOF MS ES+  
2.27e5

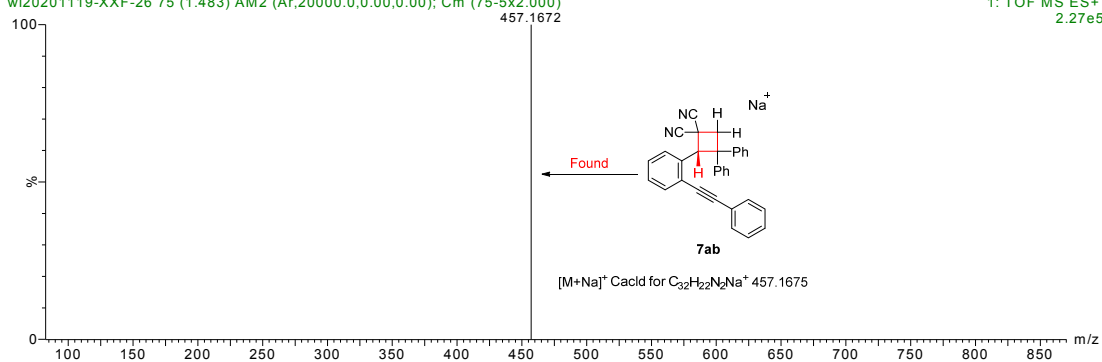

wI20201119-XXF-2 25 (0.519) AM2 (Ar,20000.0,0.00,0.00); Cm (25-5x2.000)

1: TOF MS ES+  
1.08e7

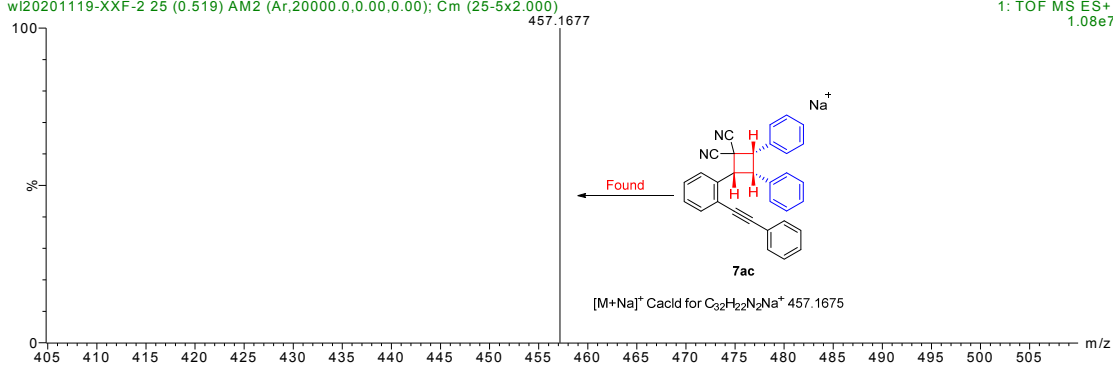

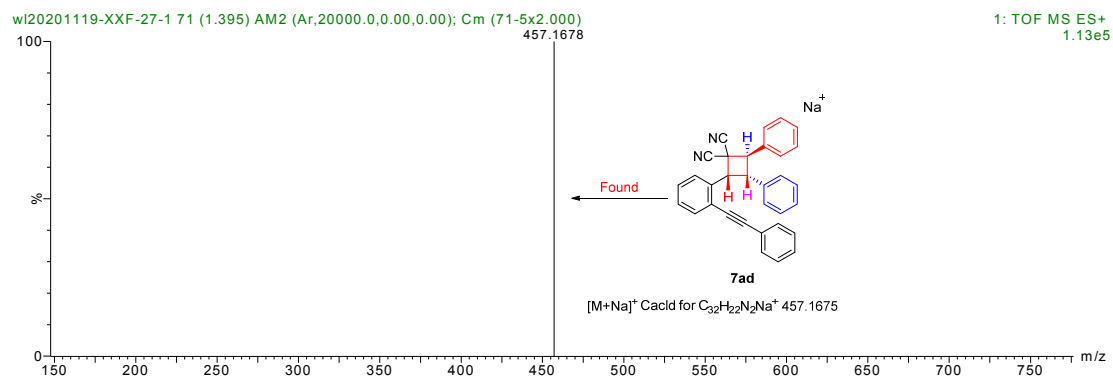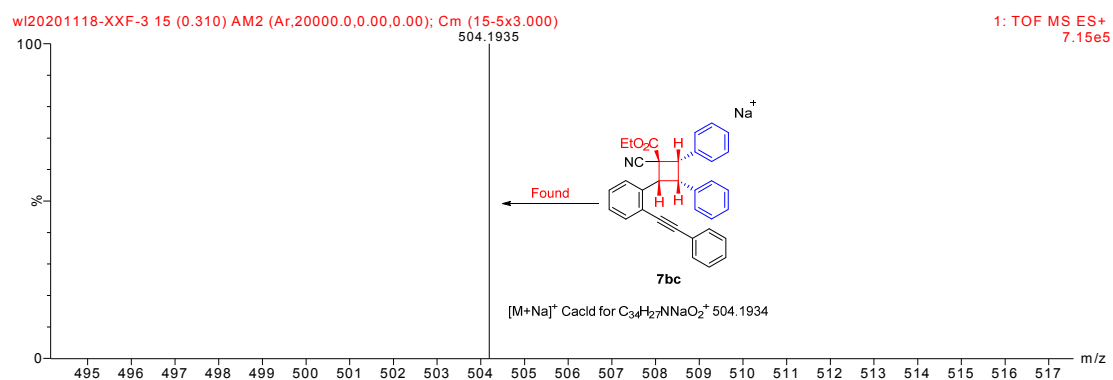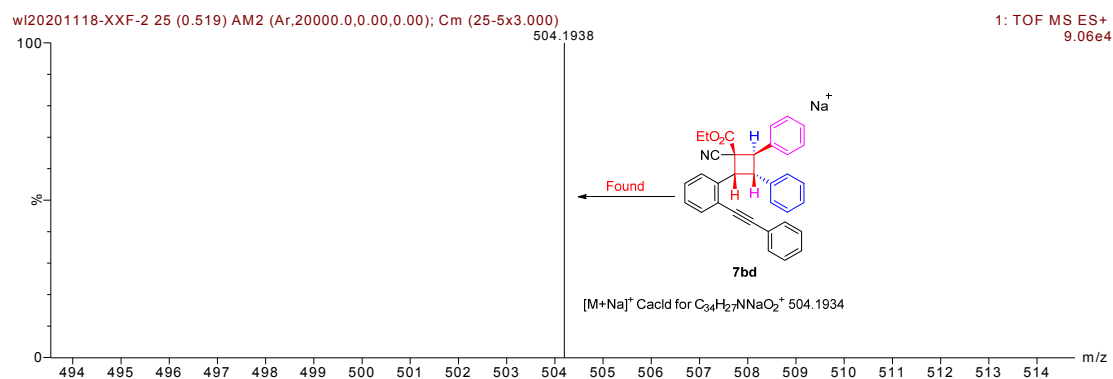

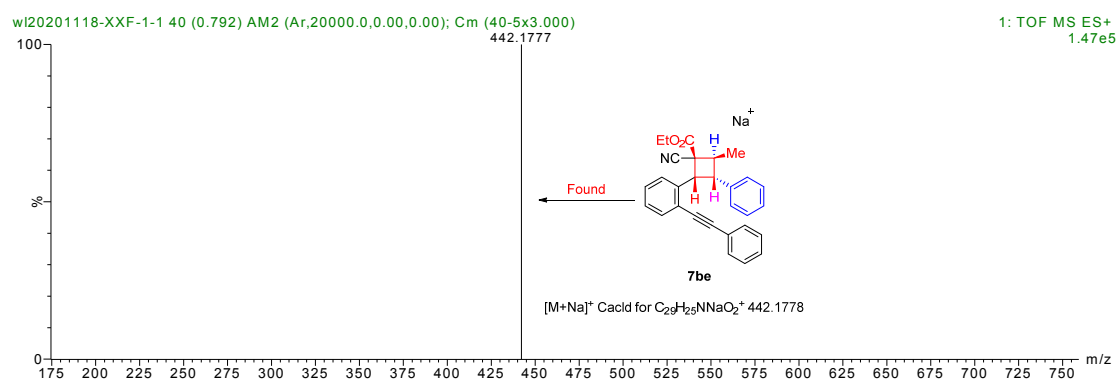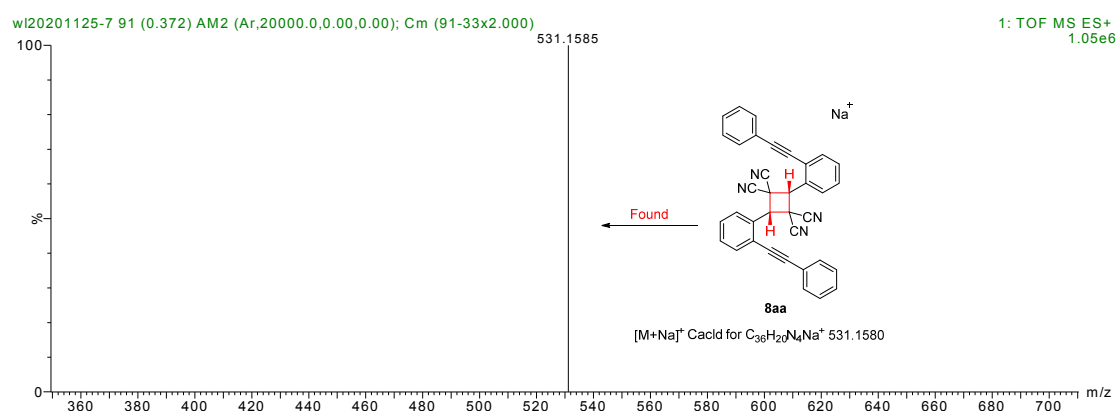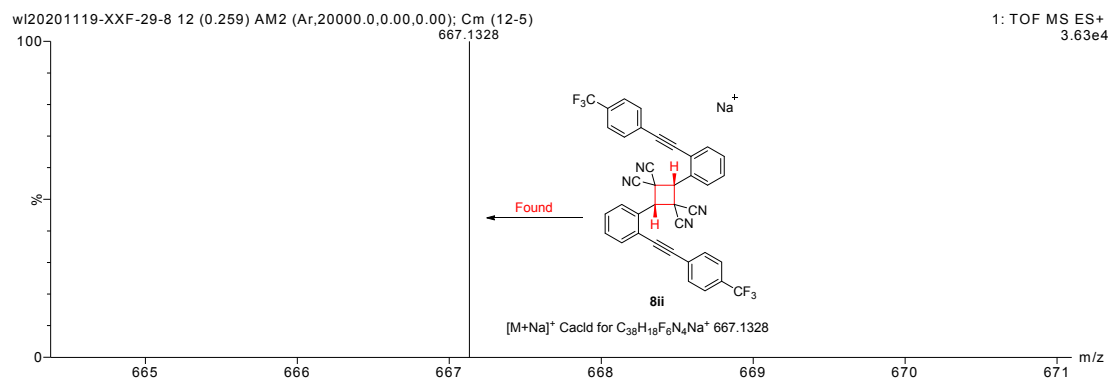

wi20201016-1-1 9 (0.209) AM2 (Ar,20000.0,0.00,0.00); Cm (9-5x3.000)

1: TOF MS ES+  
8.05e5

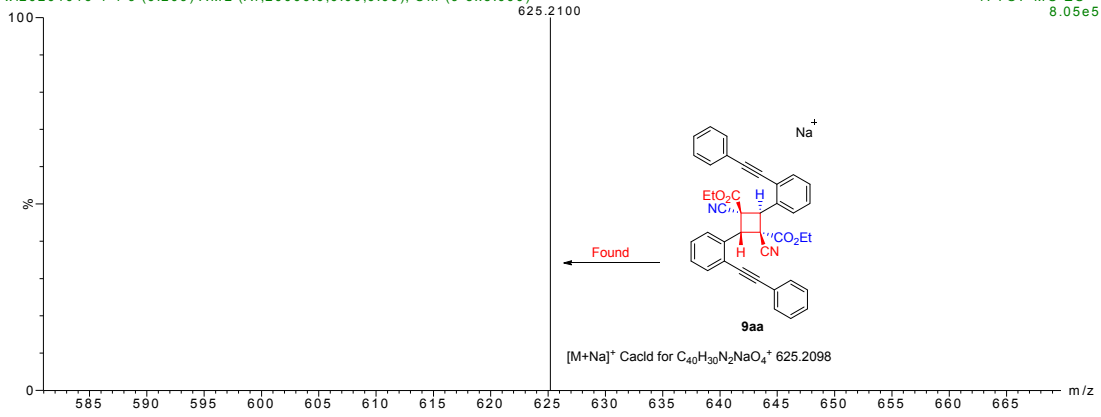

wi20201119-XXF-30 50 (1.001) AM2 (Ar,20000.0,0.00,0.00); Cm (50-5x2.000)

1: TOF MS ES+  
1.23e6

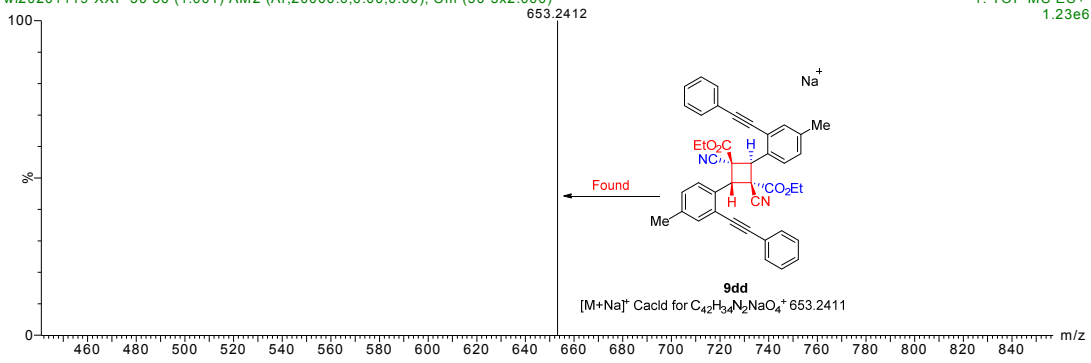

wi20201119-XXF-31 50 (1.001) AM2 (Ar,20000.0,0.00,0.00); Cm (50-5x2.000)

1: TOF MS ES+  
6.48e5

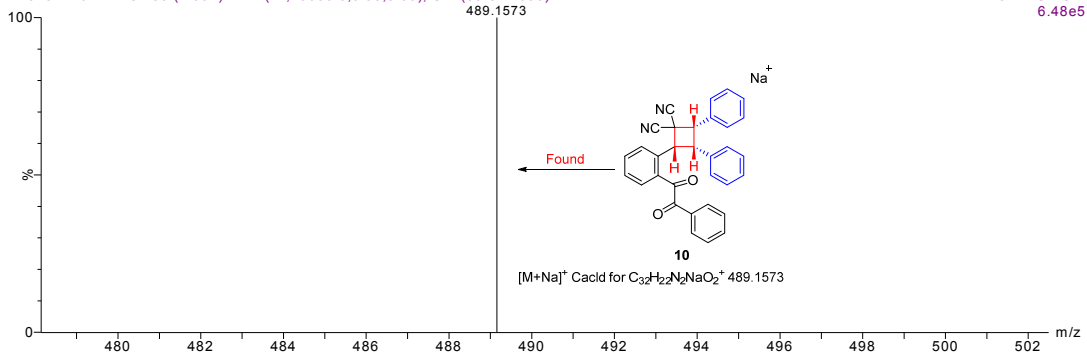

wi20200814-2 50 (1.001) AM2 (Ar,20000.0,0.00,0.00); Cm (50-5x2.000)

1: TOF MS ES+  
1.66e6

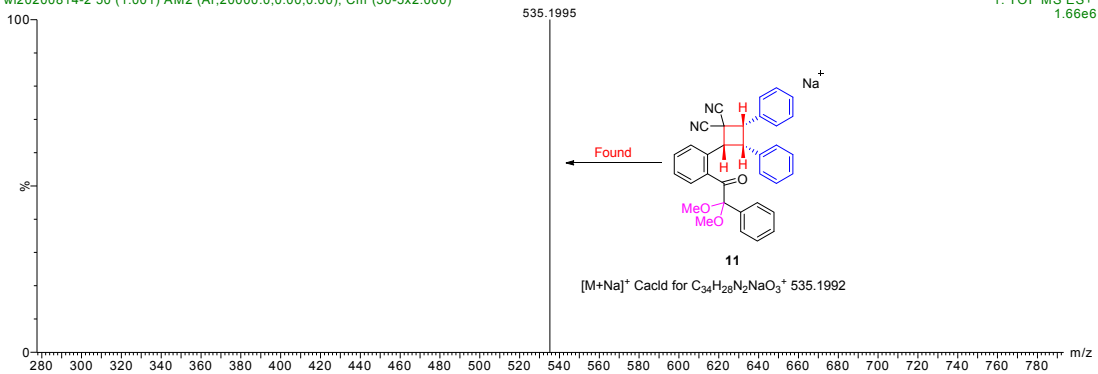

Supplement: d1qo01017d1.pdf [file d1qo01017d1.pdf]
